# Supplementary material for: Organocatalytic atroposelective synthesis of axially chiral N,N′-pyrrolylindoles via de novo indole formation
Source: PubMed Central journal article supplement — Chem Sci. 2023 Oct 11;14(43):12091–7. doi: 10.1039/d3sc03686c (PMC10631393; doi:10.1039/d3sc03686c), 2023-10-11
Supplement: SC-014-D3SC03686C-s001.pdf [file SC-014-D3SC03686C-s001.pdf]

Electronic Supplementary Information

**Organocatalytic Atroposelective Synthesis of Axially Chiral  $N, N'$ -  
Pyrrolylindoles by *De Novo* Indole Formation**

Cong-Shuai Wang,<sup>1,2,4</sup> Qi Xiong,<sup>1,4</sup> Hui Xu,<sup>3,4</sup> Hao-Ran Yang,<sup>1</sup> Yanfeng Dang,<sup>3\*</sup> Xiu-Qin Dong,<sup>1\*</sup> and Chun-Jiang Wang<sup>1,2\*</sup>

<sup>1</sup>College of Chemistry and Molecular Sciences, Wuhan University, Wuhan 430072, China;

<sup>2</sup>State Key Laboratory of Elemento-organic Chemistry, Nankai University, Tianjin, 300071, China;

<sup>3</sup>Tianjin Key Laboratory of Molecular Optoelectronic Sciences, Department of Chemistry, Tianjin University, Tianjin 300072, China;

<sup>4</sup>These two authors contributed equally.

E-mail: yanfeng.dang@tju.edu.cn; xiuqindong@whu.edu.cn; cjwang@whu.edu.cn

**Table of Contents**

|                                                                                     |      |
|-------------------------------------------------------------------------------------|------|
| 1. General remarks .....                                                            | S1   |
| 2. General procedure for synthesis of 2-alkynylanilines <b>1</b> .....              | S1   |
| 3. Procedure for the synthesis of products <b>2</b> and characterization data ..... | S16  |
| 4. Procedure for one-mmol-scale reaction and synthesis of compound <b>3</b> .....   | S39  |
| 5. Non-linear effect study .....                                                    | S40  |
| 6. Absolute configuration determination.....                                        | S41  |
| 7. Reference .....                                                                  | S42  |
| 8. NMR spectra .....                                                                | S43  |
| 9. Computational Details.....                                                       | S101 |

## 1. General remarks

$^1\text{H}$  NMR spectra were recorded on a Bruker 400 MHz spectrometer in  $\text{CDCl}_3$ . Chemical shifts are reported in ppm with the internal TMS signal at 0.0 ppm as a standard.  $^{13}\text{C}$  NMR spectra were recorded on a Bruker 100 MHz spectrometer in  $\text{CDCl}_3$ . Chemical shifts are reported in ppm with the internal chloroform signal at 77.0 ppm as a standard.  $^{19}\text{F}$  NMR spectra were recorded on a Bruker 376 MHz spectrometer in  $\text{CDCl}_3$ . Chemical shifts are reported in ppm with the internal  $\text{CF}_3\text{COOH}$  signal at -76.55 ppm. The data are reported as follows: (s = single, d = double, t = triple, q = quartet, m = multiple or unresolved, brs = broad single, coupling constant(s) in Hz, integration). High resolution mass spectra (HR-MS) were recorded on a LTQ-Orbitrap Elite mass spectrometer with MeOH as solvent mixture for the measurements. Commercially obtained reagents were used without further purification. Solvents were purified prior to use according to the standard methods. Enantiomeric ratios were determined by chiral-phase HPLC analysis in comparison with authentic racemic materials. Optical rotations were measured on an Rudolph Research Analytical Autopol VI polarimeter with  $[\alpha]_D$  values reported in degrees; concentration (c) is in g/100 mL. UV-Vis absorption spectra were recorded on a Shimadzu UV-2501 recording spectrophotometer with the baseline correction.

## 2. General procedure for synthesis of 2-alkynylanilines **1**

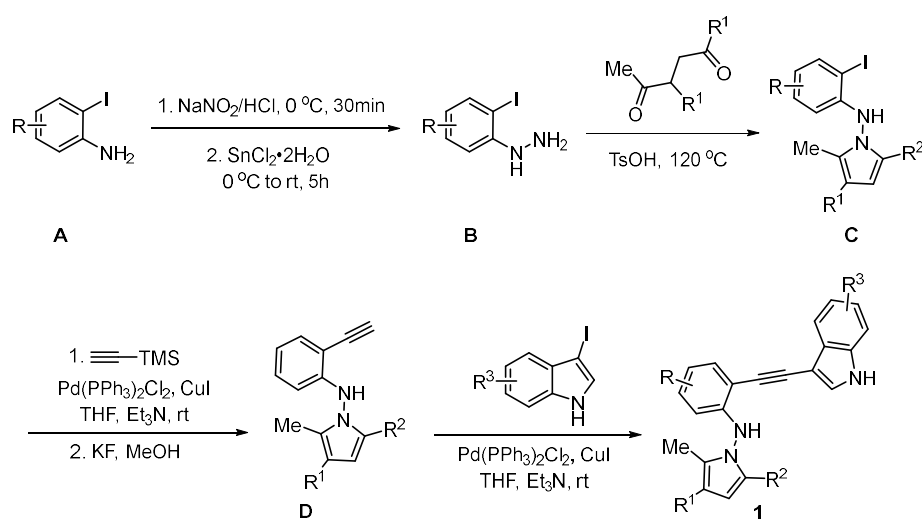

General procedure for synthesis of **B**:<sup>[1]</sup> To a stirred solution of 2-Iodoaniline **A** (17.4 mmol) in concentrated aq. HCl (34 mL) at  $0\text{ }^\circ\text{C}$  a solution of sodium nitrite (1.20 g, 17.4 mmol) in

H<sub>2</sub>O (12 mL) was added over a period of 30 minutes. The reaction mixture was stirred for a further 30 minutes then added dropwise to a solution of tin chloride hydrate (5.90 g, 26.1 mmol) in concentrated aq. HCl (30 mL) at 0 °C. After the addition is complete, the reaction was stirred at room temperature for 5 hours. Then the reaction was basified with 40% aqueous NaOH at 0 °C until the pH was 13. The mixture was then extracted with DCM (100 mL × 3) and water (100 mL). The organic phase was separated and dried over Na<sub>2</sub>SO<sub>4</sub> and concentrated in vacuo. The crude product was further purified by column chromatography to afford the compounds **B**.

General procedure for synthesis of **C**:<sup>[2]</sup> To a solution of 1, 4-diketone (15 mmol) in toluene (80 mL) was added the (2-iodophenyl)hydrazine **B** (15 mmol) and *p*-toluenesulfonic acid (TsOH, 5 mol%). The resulting mixture was heated at 120 °C for 12 h. The solvent was evaporated under reduced pressure and the residue purified by silica gel column chromatography to afford the compounds **C**.

General procedure for synthesis of **D**:<sup>[3]</sup> To a solution of (Ph<sub>3</sub>P)<sub>2</sub>PdCl<sub>2</sub> (0.36 g, 0.5 mmol) and CuI (0.19 g, 1.0 mmol) in Et<sub>3</sub>N (30 mL) were added *N*-(2-iodophenyl)-1H-pyrrol-1-amine **C** (10 mmol) and trimethylsilylacetylene (1.41 mL, 10 mmol) at room temperature. After stirring for 12 h at room temperature, the mixture was poured into saturated NH<sub>4</sub>Cl aq. and extracted with AcOEt. The AcOEt extracts were washed with brine, dried over MgSO<sub>4</sub>, then concentrated under reduced pressure to afford crude product. The crude product is dissolved in MeOH (50 mL), KF·2H<sub>2</sub>O (1.13 g, 12 mmol) was added and mixture was stirred for 12 h at room temperature. After the completion of the reaction which was indicated by TLC, the solvent was evaporated and the residue was diluted with Et<sub>2</sub>O and brine. The organic layer was separated, dried over Na<sub>2</sub>SO<sub>4</sub>, and concentrated under reduced pressure to give a crude product, which was purified by column chromatography to afford the compounds **D**.

General procedure for synthesis of **1**:<sup>[3]</sup> To a solution of (Ph<sub>3</sub>P)<sub>2</sub>PdCl<sub>2</sub> (70 mg, 0.1 mmol) and CuI (38 mg, 0.2 mmol) in Et<sub>3</sub>N (102 mL) were added 3-iodoindole<sup>[4]</sup> (5.0 mmol) and *N*-(2-ethynylphenyl)-1H-pyrrol-1-amine **D** (5.0 mmol) at room temperature. After being stirred for 12 h at room temperature, the mixture was poured into saturated NH<sub>4</sub>Cl aq. and extracted with AcOEt. The AcOEt extracts were washed with brine, dried over Na<sub>2</sub>SO<sub>4</sub>, then concentrated under reduced pressure to afford product **1**.

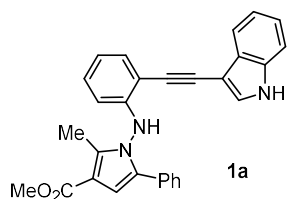

**methyl 1-((2-((1*H*-indol-3-yl)ethynyl)phenyl)amino)-2-methyl-5-phenyl-1*H*-pyrrole-3-carboxylate (1a):** 50% yield (1.11 g); Brown solid; m.p. 183-185 °C.

**<sup>1</sup>H NMR** (400 MHz, CDCl<sub>3</sub>) δ 8.34 (s, 1H), 7.58 (d, *J* = 7.9 Hz, 1H), 7.43 – 7.29 (m, 6H), 7.25 – 7.18 (m, 3H), 7.17 – 7.10 (m, 2H), 7.10 – 7.01 (m, 1H), 6.86 – 6.75 (m, 1H), 6.71 (s, 1H), 6.11 (d, *J* = 8.2 Hz, 1H), 3.78 (s, 3H), 2.43 (s, 3H).

**<sup>13</sup>C NMR** (101 MHz, CDCl<sub>3</sub>) δ 165.7, 146.9, 138.5, 135.2, 133.3, 132.0, 130.9, 129.6, 128.4, 128.2, 128.0, 127.7, 127.3, 123.3, 121.0, 120.6, 119.7, 111.5, 111.4, 110.6, 108.3, 107.7, 98.1, 90.0, 85.4, 51.0, 10.8.

**HRMS** (ESI<sup>+</sup>) Calcd. For C<sub>29</sub>H<sub>24</sub>N<sub>3</sub>O<sub>2</sub><sup>+</sup> ([M+H]<sup>+</sup>): 446.1863, found: 446.1867.

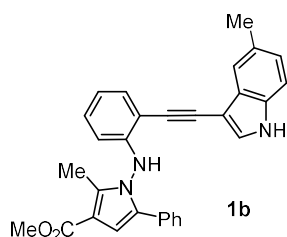

**methyl 2-methyl-1-((2-((5-methyl-1*H*-indol-3-yl)ethynyl)phenyl)amino)-5-phenyl-1*H*-pyrrole-3-carboxylate (1b):** 53% yield (1.21 g); Brown solid; m.p. 189-191 °C.

**<sup>1</sup>H NMR** (400 MHz, CDCl<sub>3</sub>) δ 8.29 (s, 1H), 7.56 – 7.37 (m, 6H), 7.34 – 7.26 (m, 3H), 7.24 – 7.18 (m, 1H), 7.17 – 7.06 (m, 2H), 6.87 (t, *J* = 7.5 Hz, 1H), 6.79 (s, 1H), 6.17 (d, *J* = 8.2 Hz, 1H), 3.85 (s, 3H), 2.50 (s, 3H), 2.45 (s, 3H).

**<sup>13</sup>C NMR** (101 MHz, CDCl<sub>3</sub>) δ 165.6, 146.9, 138.5, 133.5, 133.3, 132.0, 130.9, 130.5, 129.5, 128.5, 128.4, 128.1, 127.6, 127.3, 125.0, 120.6, 119.3, 111.3, 111.2, 110.6, 108.4, 107.7, 97.5, 90.3, 85.3, 51.0, 21.5, 10.8.

**HRMS** (ESI<sup>+</sup>) Calcd. For C<sub>30</sub>H<sub>26</sub>N<sub>3</sub>O<sub>2</sub><sup>+</sup> ([M+H]<sup>+</sup>): 460.2019, found: 460.2016.

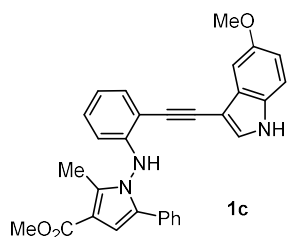

**methyl 1-((2-((5-methoxy-1*H*-indol-3-yl)ethynyl)phenyl)amino)-2-methyl-5-phenyl-1*H*-pyrrole-3-carboxylate (1c)**: 47% yield (1.12 g); Brown solid; m.p. 168-170 °C.

**<sup>1</sup>H NMR** (400 MHz, CDCl<sub>3</sub>) δ 8.29 (s, 1H), 7.44 – 7.33 (m, 5H), 7.25 – 7.18 (m, 3H), 7.16 – 7.12 (m, 1H), 7.09 – 7.02 (m, 2H), 6.86 – 6.76 (m, 2H), 6.71 (s, 1H), 3.77 (s, 3H), 3.71 (s, 3H), 2.41 (s, 3H).

**<sup>13</sup>C NMR** (101 MHz, CDCl<sub>3</sub>) δ 165.6, 155.2, 146.9, 138.4, 133.3, 132.0, 130.9, 130.2, 129.6, 128.9, 128.5, 128.4, 127.6, 127.2, 120.6, 113.8, 112.4, 111.4, 110.7, 108.4, 107.7, 101.0, 97.7, 90.2, 85.5, 55.7, 51.0, 10.7.

**HRMS** (ESI+) Calcd. For C<sub>30</sub>H<sub>26</sub>N<sub>3</sub>O<sub>3</sub><sup>+</sup> ([M+H]<sup>+</sup>): 476.1968, found: 476.1969.

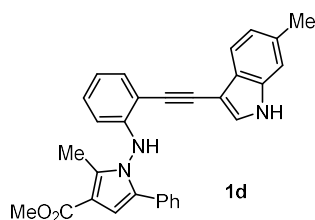

**methyl 2-methyl-1-((2-((6-methyl-1*H*-indol-3-yl)ethynyl)phenyl)amino)-5-phenyl-1*H*-pyrrole-3-carboxylate (1d)**: 50% yield (1.15 g); Brown solid; m.p. 189-191 °C.

**<sup>1</sup>H NMR** (400 MHz, CDCl<sub>3</sub>) δ 8.29 (s, 1H), 7.52 (d, *J* = 8.1 Hz, 1H), 7.49 – 7.37 (m, 5H), 7.33 – 7.26 (m, 2H), 7.24 – 7.19 (m, 1H), 7.17 (s, 1H), 7.15 – 7.08 (m, 1H), 7.06 – 6.99 (m, 1H), 6.89 – 6.82 (m, 1H), 6.78 (s, 1H), 3.85 (s, 3H), 2.50 (s, 3H), 2.46 (s, 3H).

**<sup>13</sup>C NMR** (101 MHz, CDCl<sub>3</sub>) δ 165.7, 146.9, 138.5, 135.6, 133.29, 133.27, 131.9, 130.8, 129.5, 129.4, 127.7, 127.5, 127.3, 126.1, 122.8, 120.6, 119.3, 111.4, 111.3, 110.6, 108.4, 107.7, 97.8, 90.3, 85.2, 51.0, 21.7, 10.8.

**HRMS** (ESI+) Calcd. For C<sub>30</sub>H<sub>26</sub>N<sub>3</sub>O<sub>2</sub><sup>+</sup> ([M+H]<sup>+</sup>): 460.2019, found: 460.2018.

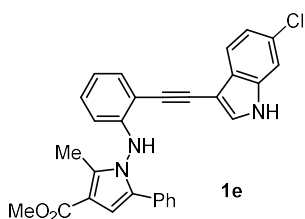

**methyl 1-((2-((6-chloro-1H-indol-3-yl)ethynyl)phenyl)amino)-2-methyl-5-phenyl-1H-pyrrole-3-carboxylate (1e):** 52% yield (1.25 g); Brown solid; m.p. 193-195 °C.

**<sup>1</sup>H NMR** (400 MHz, CDCl<sub>3</sub>) δ 8.44 (s, 1H), 7.52 (d, *J* = 8.4 Hz, 1H), 7.47 – 7.42 (m, 4H), 7.41 – 7.35 (m, 2H), 7.33 – 7.27 (m, 2H), 7.25 – 7.21 (m, 1H), 7.19 – 7.11 (m, 2H), 6.93 – 6.83 (m, 1H), 6.78 (s, 1H), 3.85 (s, 3H), 2.50 (s, 3H).

**<sup>13</sup>C NMR** (101 MHz, CDCl<sub>3</sub>) δ 165.6, 147.0, 138.4, 135.5, 133.3, 132.1, 130.9, 129.8, 129.3, 128.6, 128.5, 127.7, 127.4, 126.8, 121.8, 120.7, 120.6, 111.5, 111.4, 110.7, 108.0, 107.8, 98.4, 89.3, 85.8, 51.0, 10.8.

**HRMS** (ESI+) Calcd. For C<sub>29</sub>H<sub>22</sub>N<sub>3</sub>O<sub>2</sub>ClNa<sup>+</sup> ([M+Na]<sup>+</sup>): 502.1299, found: 502.1295.

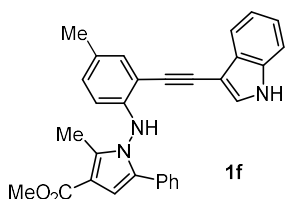

**methyl 1-((2-((1H-indol-3-yl)ethynyl)-4-methylphenyl)amino)-2-methyl-5-phenyl-1H-pyrrole-3-carboxylate (1f):** 49% yield (1.12 g); Brown solid; m.p. 137-139 °C.

**<sup>1</sup>H NMR** (400 MHz, CDCl<sub>3</sub>) δ 8.42 (s, 1H), 7.65 (d, *J* = 7.8 Hz, 1H), 7.52 – 7.43 (m, 3H), 7.39 (d, *J* = 8.1 Hz, 1H), 7.34 – 7.25 (m, 5H), 7.22 – 7.16 (m, 2H), 6.97 – 6.90 (m, 1H), 6.78 (s, 1H), 6.10 (d, *J* = 8.3 Hz, 1H), 3.85 (s, 3H), 2.49 (s, 3H), 2.25 (s, 3H).

**<sup>13</sup>C NMR** (101 MHz, CDCl<sub>3</sub>) δ 165.7, 144.7, 138.5, 135.2, 133.3, 132.3, 131.0, 130.3, 130.0, 128.4, 128.3, 128.0, 127.7, 127.3, 123.3, 121.0, 119.7, 111.5, 110.5, 108.2, 107.6, 98.1, 89.7, 85.6, 51.0, 20.4, 10.8.

**HRMS** (ESI+) Calcd. For C<sub>30</sub>H<sub>26</sub>N<sub>3</sub>O<sub>2</sub><sup>+</sup> ([M+H]<sup>+</sup>): 460.2019, found: 460.2018.

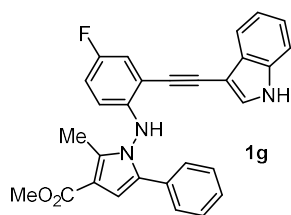

**methyl 1-((2-((1*H*-indol-3-yl)ethynyl)-4-fluorophenyl)amino)-2-methyl-5-phenyl-1*H*-pyrrole-3-carboxylate (1g):** 55% yield (1.27 g); Brown solid; m.p. 123-125 °C.

**<sup>1</sup>H NMR** (400 MHz, CDCl<sub>3</sub>) δ 8.40 (s, 1H), 7.57 (dd, *J* = 7.7, 1.2 Hz, 1H), 7.42 (d, *J* = 2.7 Hz, 1H), 7.39 – 7.31 (m, 3H), 7.26 – 7.19 (m, 4H), 7.16 – 7.12 (m, 2H), 7.07 (dd, *J* = 8.8, 2.9 Hz, 1H), 6.81 – 6.72 (m, 1H), 6.70 (s, 1H), 6.01 (dd, *J* = 9.0, 4.7 Hz, 1H), 3.78 (s, 3H), 2.43 (s, 3H).

**<sup>13</sup>C NMR** (101 MHz, CDCl<sub>3</sub>) δ 165.6, 156.8 (d, *J* = 239.5 Hz), 143.4, 138.3, 135.2, 133.2, 130.8, 128.5, 128.4, 128.2, 127.7, 127.4, 123.4, 121.2, 119.6, 118.1 (d, *J* = 24.1 Hz), 116.5 (d, *J* = 22.8 Hz), 112.7, 111.6, 110.7, 109.4 (d, *J* = 9.5 Hz), 107.8, 97.6, 91.1, 84.6, 51.0, 10.8.

**<sup>19</sup>F NMR** (376 MHz, CDCl<sub>3</sub>) δ -123.4 – -123.5 (m, 1F).

**HRMS** (ESI+) Calcd. For C<sub>29</sub>H<sub>22</sub>N<sub>3</sub>O<sub>2</sub>FNa<sup>+</sup> ([M+Na]<sup>+</sup>): 486.1588, found: 486.1592.

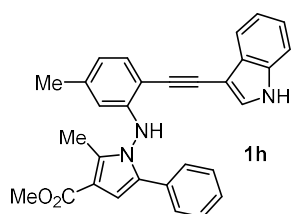

**methyl 1-((2-((1*H*-indol-3-yl)ethynyl)-5-methylphenyl)amino)-2-methyl-5-phenyl-1*H*-pyrrole-3-carboxylate (1h):** 50% yield (1.15 g); Brown solid; m.p. 143-145 °C.

**<sup>1</sup>H NMR** (400 MHz, CDCl<sub>3</sub>) δ 8.36 (s, 1H), 7.57 – 7.52 (m, 1H), 7.43 – 7.38 (m, 2H), 7.36 (d, *J* = 2.7 Hz, 1H), 7.32 – 7.28 (m, 1H), 7.26 – 7.19 (m, 3H), 7.19 – 7.13 (m, 3H), 7.12 – 7.07 (m, 1H), 6.71 (s, 1H), 6.64 – 6.58 (m, 1H), 5.96 – 5.90 (m, 1H), 3.78 (s, 3H), 2.42 (s, 3H), 2.13 (s, 3H).

**<sup>13</sup>C NMR** (101 MHz, CDCl<sub>3</sub>) δ 165.6, 146.9, 138.4, 134.8, 133.3, 131.9, 130.9, 129.5, 128.4, 127.9, 127.7, 127.3, 123.9, 121.2, 120.8, 120.6, 117.3, 111.3, 110.6, 108.4, 107.7, 98.5, 90.2, 85.4, 51.0, 16.5, 10.8.

**HRMS** (ESI+) Calcd. For C<sub>30</sub>H<sub>26</sub>N<sub>3</sub>O<sub>2</sub><sup>+</sup> ([M+H]<sup>+</sup>): 460.2019, found: 460.2016.

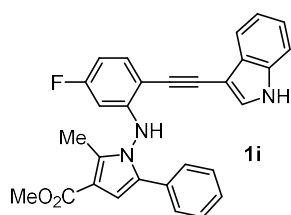

**methyl 1-((2-((1*H*-indol-3-yl)ethynyl)-5-fluorophenyl)amino)-2-methyl-5-phenyl-1*H*-pyrrole-3-carboxylate (1i):** 47% yield (1.09 g); Brown solid; m.p. 121-123 °C.

**<sup>1</sup>H NMR** (400 MHz, CDCl<sub>3</sub>) δ 8.37 (s, 1H), 7.56 (dd, *J* = 7.9, 1.2 Hz, 1H), 7.41 – 7.35 (m, 4H), 7.35 – 7.30 (m, 2H), 7.23 – 7.21 (m, 1H), 7.20 – 7.16 (m, 3H), 7.16 – 7.10 (m, 1H), 6.71 (s, 1H), 6.52 – 6.45 (m, 1H), 5.79 (dd, *J* = 10.3, 2.5 Hz, 1H), 3.78 (s, 3H), 2.43 (s, 3H).

**<sup>13</sup>C NMR** (101 MHz, CDCl<sub>3</sub>) δ 165.5, 163.7 (d, *J* = 248.7 Hz), 148.8 (d, *J* = 10.5 Hz), 138.1, 135.2, 133.6 (d, *J* = 9.7 Hz), 133.1, 130.7, 128.5, 128.1, 127.7, 127.5, 123.4, 121.1, 119.6, 111.6, 110.9, 108.0, 107.7 (d, *J* = 22.3 Hz), 104.2 (d, *J* = 2.9 Hz), 99.1 (d, *J* = 27.5 Hz), 97.9, 89.6, 84.4, 51.1, 10.7.

**<sup>19</sup>F NMR** (376 MHz, CDCl<sub>3</sub>) δ -108.1 – -108.3 (m, 1F).

**HRMS** (ESI<sup>+</sup>) Calcd. For C<sub>29</sub>H<sub>22</sub>N<sub>3</sub>O<sub>2</sub>FN<sup>+</sup> ([M+Na]<sup>+</sup>): 486.1588, found: 486.1590.

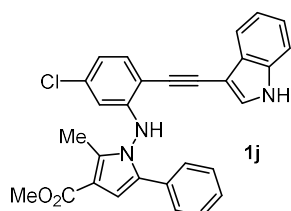

**methyl 1-((2-((1*H*-indol-3-yl)ethynyl)-5-chlorophenyl)amino)-2-methyl-5-phenyl-1*H*-pyrrole-3-carboxylate (1j):** 43% yield (1.03 g); Brown solid; m.p. 172-174 °C.

**<sup>1</sup>H NMR** (400 MHz, CDCl<sub>3</sub>) δ 8.37 (s, 1H), 7.59 – 7.52 (m, 1H), 7.40 (d, *J* = 2.7 Hz, 1H), 7.39 – 7.31 (m, 4H), 7.28 (d, *J* = 8.2 Hz, 1H), 7.24 – 7.21 (m, 1H), 7.20 – 7.10 (m, 4H), 6.76 (dd, *J* = 8.2, 2.0 Hz, 1H), 6.71 (s, 1H), 6.07 (d, *J* = 2.1 Hz, 1H), 3.79 (s, 3H), 2.43 (s, 3H).

**<sup>13</sup>C NMR** (101 MHz, CDCl<sub>3</sub>) δ 165.6, 147.8, 138.1, 135.5, 135.2, 133.0, 132.9, 130.6, 128.5, 128.20, 128.16, 127.7, 127.5, 123.4, 121.1, 120.9, 119.6, 111.6, 111.3, 110.9, 108.0, 106.8, 97.8, 91.0, 84.5, 51.1, 10.8.



**HRMS** (ESI+) Calcd. For  $C_{29}H_{22}N_3O_2ClNa^+$  ( $[M+Na]^+$ ): 502.1292, found: 502.1295.

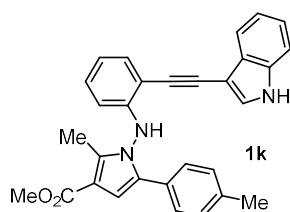

**methyl 1-((2-((1H-indol-3-yl)ethynyl)phenyl)amino)-2-methyl-5-(p-tolyl)-1H-pyrrole-3-carboxylate (1k)**: 50% yield (1.15 g); Brown solid; m.p. 113-115 °C.

**$^1H$  NMR** (400 MHz,  $CDCl_3$ )  $\delta$  8.46 (s, 1H), 7.64 (d,  $J = 7.9$  Hz, 1H), 7.48 – 7.43 (m, 2H), 7.41 – 7.33 (m, 4H), 7.29 – 7.25 (m, 1H), 7.22 – 7.17 (m, 1H), 7.15 – 7.08 (m, 3H), 6.91 – 6.82 (m, 1H), 6.74 (s, 1H), 6.25 – 6.11 (m, 1H), 3.85 (s, 3H), 2.49 (s, 3H), 2.29 (s, 3H).

**$^{13}C$  NMR** (101 MHz,  $CDCl_3$ )  $\delta$  165.7, 147.0, 138.2, 137.1, 135.2, 133.4, 131.9, 129.6, 129.2, 128.3, 128.03, 128.00, 127.6, 123.3, 121.0, 120.6, 119.7, 111.5, 111.3, 110.5, 108.2, 107.2, 98.1, 90.0, 85.5, 51.0, 21.1, 10.8.

**HRMS** (ESI+) Calcd. For  $C_{30}H_{26}N_3O_2^+$  ( $[M+H]^+$ ): 460.2019, found: 460.2020.

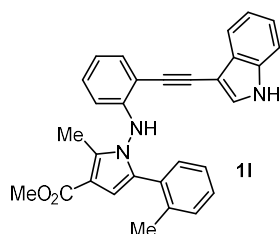

**methyl 1-((2-((1H-indol-3-yl)ethynyl)phenyl)amino)-2-methyl-5-(o-tolyl)-1H-pyrrole-3-carboxylate (1l)**: 51% yield (1.17 g); Brown solid; m.p. 103-105 °C.

**$^1H$  NMR** (400 MHz,  $CDCl_3$ )  $\delta$  8.37 (s, 1H), 7.69 – 7.56 (m, 1H), 7.39 (d,  $J = 2.7$  Hz, 1H), 7.36 – 7.32 (m, 1H), 7.21 – 7.16 (m, 4H), 7.11 – 6.92 (m, 5H), 6.76 – 6.68 (m, 1H), 6.52 (s, 1H), 6.03 – 5.97 (m, 1H), 3.78 (s, 3H), 2.50 (s, 3H), 2.13 (s, 3H).

**$^{13}C$  NMR** (101 MHz,  $CDCl_3$ )  $\delta$  165.9, 147.2, 137.6, 135.2, 132.0, 131.5, 130.8, 130.2, 130.0, 129.1, 128.3, 128.2, 127.9, 125.4, 123.3, 120.9, 120.6, 119.7, 111.6, 109.8, 108.8, 108.4, 98.2, 89.6, 85.2, 51.0, 20.2, 10.9.

**HRMS** (ESI+) Calcd. For  $C_{30}H_{26}N_3O_2^+$  ( $[M+H]^+$ ): 460.2019, found: 460.2017.

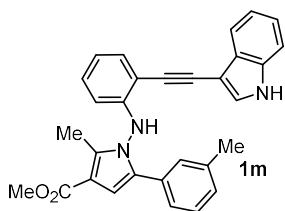

**methyl 1-((2-((1*H*-indol-3-yl)ethynyl)phenyl)amino)-2-methyl-5-(*m*-tolyl)-1*H*-pyrrole-3-carboxylate (1m):** 52% yield (1.19 g); Brown solid; m.p. 117-119 °C.

**<sup>1</sup>H NMR** (400 MHz, CDCl<sub>3</sub>) δ 8.45 (s, 1H), 7.66 – 7.59 (m, 1H), 7.49 – 7.35 (m, 4H), 7.26 – 7.23 (m, 3H), 7.22 – 7.16 (m, 2H), 7.16 – 7.09 (m, 1H), 7.03 (d, *J* = 7.5 Hz, 1H), 6.91 – 6.81 (m, 1H), 6.77 (s, 1H), 6.19 – 6.13 (m, 1H), 3.85 (s, 3H), 2.52 (s, 3H), 2.25 (s, 3H).

**<sup>13</sup>C NMR** (101 MHz, CDCl<sub>3</sub>) δ 165.7, 147.0, 138.5, 138.0, 135.2, 133.3, 131.9, 130.7, 129.5, 128.5, 128.3, 128.2, 128.1, 128.0, 124.8, 123.3, 121.0, 120.6, 119.7, 111.5, 111.4, 110.4, 108.3, 107.7, 98.1, 90.0, 85.4, 51.0, 21.4, 10.8.

**HRMS** (ESI+) Calcd. For C<sub>30</sub>H<sub>26</sub>N<sub>3</sub>O<sub>2</sub><sup>+</sup> ([M+H]<sup>+</sup>): 460.2019, found: 460.2022.

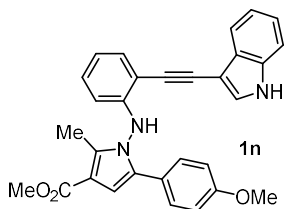

**methyl 1-((2-((1*H*-indol-3-yl)ethynyl)phenyl)amino)-5-(4-methoxyphenyl)-2-methyl-1*H*-pyrrole-3-carboxylate (1n):** 57% yield (1.35 g); Brown solid; m.p. 114-116 °C.

**<sup>1</sup>H NMR** (400 MHz, CDCl<sub>3</sub>) δ 8.45 (s, 1H), 7.67 – 7.61 (m, 1H), 7.48 – 7.43 (m, 2H), 7.42 – 7.34 (m, 4H), 7.30 – 7.25 (m, 1H), 7.23 – 7.17 (m, 1H), 7.17 – 7.10 (m, 1H), 6.92 – 6.79 (m, 3H), 6.69 (s, 1H), 6.18 (d, *J* = 8.1 Hz, 1H), 3.85 (s, 3H), 3.74 (s, 3H), 2.49 (s, 3H).

**<sup>13</sup>C NMR** (101 MHz, CDCl<sub>3</sub>) δ 165.6, 159.0, 147.0, 137.9, 135.2, 133.2, 132.0, 129.6, 129.1, 128.3, 128.0, 123.5, 123.3, 121.0, 120.6, 119.7, 113.9, 111.5, 111.3, 110.4, 108.3, 106.8, 98.1, 90.0, 85.5, 55.2, 51.0, 10.8.

**HRMS** (ESI+) Calcd. For C<sub>30</sub>H<sub>26</sub>N<sub>3</sub>O<sub>3</sub><sup>+</sup> ([M+H]<sup>+</sup>): 476.1968, found: 476.1970.

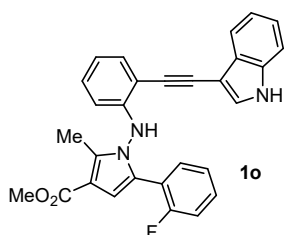

**methyl 1-((2-((1*H*-indol-3-yl)ethynyl)phenyl)amino)-5-(2-fluorophenyl)-2-methyl-1*H*-pyrrole-3-carboxylate (1o)**: 49% yield (1.13 g); Brown solid; m.p. 123-125 °C.

**<sup>1</sup>H NMR** (400 MHz, CDCl<sub>3</sub>) δ 8.45 (s, 1H), 7.84 – 7.77 (m, 1H), 7.60 (d, *J* = 4.2 Hz, 1H), 7.54 (d, *J* = 2.6 Hz, 1H), 7.47 – 7.40 (m, 1H), 7.33 – 7.27 (m, 3H), 7.25 – 7.16 (m, 2H), 7.08 – 6.96 (m, 3H), 6.79 – 6.71 (m, 2H), 5.93 (dd, *J* = 8.3, 1.1 Hz, 1H), 3.86 (s, 3H), 2.57 (s, 3H).

**<sup>13</sup>C NMR** (101 MHz, CDCl<sub>3</sub>) δ 165.6, 159.8 (d, *J* = 245.7 Hz), 146.9, 139.2, 135.3, 131.5, 131.3 (d, *J* = 3.0 Hz), 129.7 (d, *J* = 8.6 Hz), 129.1, 128.2, 128.1, 127.6, 124.3 (d, *J* = 3.5 Hz), 123.3, 121.0, 120.4, 119.9, 119.0 (d, *J* = 14.0 Hz), 115.7 (d, *J* = 22.7 Hz), 111.5, 110.9, 110.5, 109.6, 108.2, 98.3, 89.8, 85.2, 51.0, 10.9.

**<sup>19</sup>F NMR** (376 MHz, CDCl<sub>3</sub>) δ -113.8 – -114.0 (m, 1F).

**HRMS** (ESI+) Calcd. For C<sub>29</sub>H<sub>22</sub>N<sub>3</sub>O<sub>2</sub>FNa<sup>+</sup> ([M+Na]<sup>+</sup>): 486.1588, found: 486.1591.

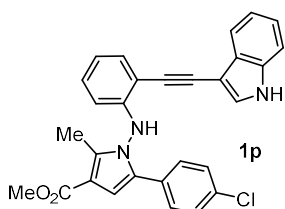

**methyl 1-((2-((1*H*-indol-3-yl)ethynyl)phenyl)amino)-5-(4-chlorophenyl)-2-methyl-1*H*-pyrrole-3-carboxylate (1p)**: 45% yield (1.08 g); Brown solid; m.p. 123-125 °C.

**<sup>1</sup>H NMR** (400 MHz, CDCl<sub>3</sub>) δ 8.44 (s, 1H), 7.67 (d, *J* = 7.7 Hz, 1H), 7.52 – 7.45 (m, 2H), 7.44 – 7.36 (m, 4H), 7.27 – 7.19 (m, 4H), 7.17 – 7.07 (m, 1H), 6.93 – 6.84 (m, 1H), 6.77 (s, 1H), 6.20 – 6.10 (m, 1H), 3.85 (s, 3H), 2.49 (s, 3H).

**<sup>13</sup>C NMR** (101 MHz, CDCl<sub>3</sub>) δ 165.5, 146.7, 138.7, 135.2, 133.2, 132.13, 132.10, 129.6, 129.4, 128.8, 128.6, 128.2, 128.1, 123.4, 121.1, 120.8, 119.6, 111.6, 111.3, 110.8, 108.4, 107.9, 98.0, 90.2, 85.3, 51.1, 10.8.

**HRMS** (ESI+) Calcd. For C<sub>29</sub>H<sub>23</sub>N<sub>3</sub>O<sub>2</sub><sup>+</sup> ([M+H]<sup>+</sup>): 481.1551, found: 484.1554.

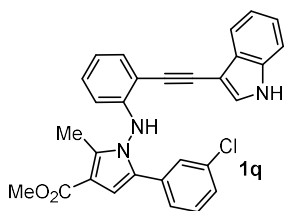

**methyl 1-((2-((1*H*-indol-3-yl)ethynyl)phenyl)amino)-5-(3-chlorophenyl)-2-methyl-1*H*-pyrrole-3-carboxylate (1q)**: 42% yield (1.01 g); Brown solid; m.p. 119-121 °C.

**<sup>1</sup>H NMR** (400 MHz, CDCl<sub>3</sub>) δ 8.42 (s, 1H), 7.73 – 7.64 (m, 1H), 7.50 (d, *J* = 2.6 Hz, 2H), 7.47 (dd, *J* = 7.6, 1.5 Hz, 1H), 7.43 – 7.34 (m, 3H), 7.30 – 7.27 (m, 1H), 7.24 – 7.17 (m, 3H), 7.16 – 7.11 (m, 1H), 6.94 – 6.85 (m, 1H), 6.80 (s, 1H), 6.19 – 6.06 (m, 1H), 3.85 (s, 3H), 2.49 (s, 3H).

**<sup>13</sup>C NMR** (101 MHz, CDCl<sub>3</sub>) δ 165.4, 146.7, 139.0, 135.2, 134.2, 132.6, 132.1, 131.8, 129.7, 129.6, 128.2, 128.1, 127.6, 127.3, 125.5, 123.4, 121.1, 120.9, 119.7, 111.5, 111.3, 110.9, 108.5, 108.4, 98.0, 90.2, 85.3, 51.1, 10.8.

**HRMS** (ESI+) Calcd. For C<sub>29</sub>H<sub>22</sub>N<sub>3</sub>O<sub>2</sub>ClNa<sup>+</sup> ([M+Na]<sup>+</sup>): 502.1292, found: 502.1290.

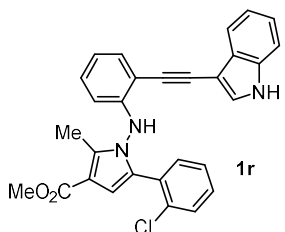

**methyl 1-((2-((1*H*-indol-3-yl)ethynyl)phenyl)amino)-5-(2-chlorophenyl)-2-methyl-1*H*-pyrrole-3-carboxylate (1r)**: 40% yield (0.96 g); Brown solid; m.p. 107-109 °C.

**<sup>1</sup>H NMR** (400 MHz, CDCl<sub>3</sub>) δ 8.52 (s, 1H), 7.78 (dd, *J* = 7.0, 1.9 Hz, 1H), 7.64 - 7.47 (m, 2H), 7.44 - 7.38 (m, 1H), 7.35 - 7.25 (m, 4H), 7.20 - 7.12 (m, 2H), 7.10 - 6.98 (m, 2H), 6.75 (t, *J* = 7.5 Hz, 1H), 6.69 (s, 1H), 5.96 (d, *J* = 8.2 Hz, 1H), 3.86 (s, 3H), 2.59 (s, 3H).

**<sup>13</sup>C NMR** (101 MHz, CDCl<sub>3</sub>) δ 165.7, 147.1, 138.7, 135.2, 134.0, 132.6, 131.5, 130.5, 130.2, 129.7, 129.4, 129.0, 128.2, 128.1, 126.6, 123.2, 120.9, 120.4, 119.9, 111.5, 111.1, 110.0, 109.3, 108.4, 98.3, 89.8, 85.1, 51.0, 10.9.

**HRMS** (ESI+) Calcd. For C<sub>29</sub>H<sub>22</sub>N<sub>3</sub>O<sub>2</sub>ClNa<sup>+</sup> ([M+Na]<sup>+</sup>): 502.1292, found: 502.1294.

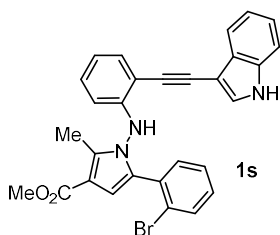

**methyl 1-((2-((1*H*-indol-3-yl)ethynyl)phenyl)amino)-5-(2-bromophenyl)-2-methyl-1*H*-pyrrole-3-carboxylate (1s):** 43% yield (1.12 g); Brown solid; m.p. 129-131 °C.

**<sup>1</sup>H NMR** (400 MHz, CDCl<sub>3</sub>) δ 8.41 (s, 1H), 7.81 - 7.67 (m, 1H), 7.51 (s, 1H), 7.48 (d, *J* = 2.7 Hz, 1H), 7.45 - 7.40 (m, 1H), 7.37 - 7.32 (m, 1H), 7.24 - 7.19 (m, 1H), 7.18 - 7.15 (m, 2H), 7.07 - 6.92 (m, 4H), 6.72 - 6.65 (m, 1H), 6.59 (s, 1H), 5.93 - 5.88 (m, 1H), 3.79 (s, 3H), 2.52 (s, 3H).

**<sup>13</sup>C NMR** (101 MHz, CDCl<sub>3</sub>) δ 165.7, 147.1, 138.5, 135.2, 132.8, 132.4, 132.2, 131.9, 131.5, 129.9, 129.0, 128.2, 128.1, 127.1, 124.7, 123.2, 120.8, 120.4, 119.9, 111.5, 111.3, 109.8, 109.1, 108.3, 98.3, 89.8, 85.1, 51.0, 10.9.

**HRMS** (ESI<sup>+</sup>) Calcd. For C<sub>29</sub>H<sub>22</sub>N<sub>3</sub>O<sub>2</sub>BrNa<sup>+</sup> ([M+Na]<sup>+</sup>): 546.0787, found: 546.0791.

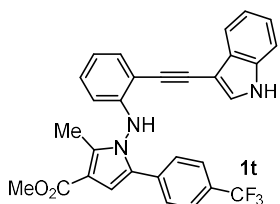

**Methyl 1-((2-((1*H*-indol-3-yl)ethynyl)phenyl)amino)-2-methyl-5-(4-(trifluoromethyl)phenyl)-1*H*-pyrrole-3-carboxylate (1t):** 90% yield (1.53 g); Brown solid; m.p. 112-114 °C.

**<sup>1</sup>H NMR** (400 MHz, CDCl<sub>3</sub>) δ 8.41 (s, 1H), 7.68 (d, *J* = 7.7 Hz, 1H), 7.64 - 7.62 (m, 2H), 7.57 - 7.54 (m, 2H), 7.51 - 7.49 (m, 2H), 7.43 - 7.41 (m, 2H), 7.30 - 7.28 (m, 1H), 7.24 - 7.20 (m, 1H), 7.17 - 7.13 (m, 1H), 6.93 - 6.89 (m, 2H), 6.17 (d, *J* = 8.2 Hz, 1H), 3.86 (s, 3H), 2.50 (s, 3H).

**<sup>13</sup>C NMR** (101 MHz, CDCl<sub>3</sub>) δ 165.3, 146.5, 139.3, 135.2, 132.2, 130.0 (q, *J* = 253.0 Hz), 129.7, 128.1, 127.4, 125.4 (q, *J* = 4.0 Hz), 123.4, 121.1, 121.0, 119.6, 111.6, 111.3, 108.9, 108.5, 98.0, 90.3, 85.2, 51.1, 10.8.

**<sup>19</sup>F NMR** (377 MHz, CDCl<sub>3</sub>) δ -62.5.

**HRMS** (ESI<sup>+</sup>) Calcd. For C<sub>30</sub>H<sub>22</sub>F<sub>3</sub>N<sub>3</sub>O<sub>2</sub>Na<sup>+</sup> ([M+Na]<sup>+</sup>): 535.1484, found: 535.1490.

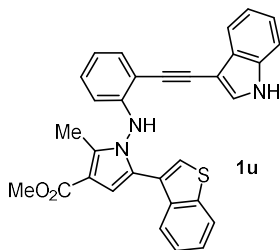

**methyl 1-((2-((1*H*-indol-3-yl)ethynyl)phenyl)amino)-5-(benzo[*b*]thiophen-3-yl)-2-methyl-1*H*-pyrrole-3-carboxylate (1u):** 60% yield (1.50 g); Brown solid; m.p. 125-127 °C.

**<sup>1</sup>H NMR** (400 MHz, CDCl<sub>3</sub>) δ 8.36 (s, 1H), 7.83 – 7.64 (m, 1H), 7.62 – 7.58 (m, 1H), 7.56 – 7.52 (m, 1H), 7.45 (dd, *J* = 7.7, 1.5 Hz, 1H), 7.43 (s, 1H), 7.40 (d, *J* = 2.7 Hz, 1H), 7.35 (s, 1H), 7.30 – 7.26 (m, 1H), 7.20 – 7.14 (m, 2H), 7.14 – 7.08 (m, 2H), 7.06 – 7.00 (m, 1H), 6.92 (s, 1H), 6.86 – 6.76 (m, 1H), 6.17 – 6.03 (m, 1H), 3.76 (s, 3H), 2.38 (s, 3H).

**<sup>13</sup>C NMR** (101 MHz, CDCl<sub>3</sub>) δ 165.3, 146.2, 139.9, 139.1, 138.9, 135.2, 132.3, 132.1, 129.7, 128.2, 127.3, 124.3, 124.1, 123.3, 121.8, 121.04, 121.01, 119.7, 119.4, 111.6, 111.4, 111.2, 108.7, 108.2, 97.9, 90.5, 85.5, 51.1, 10.6.

**HRMS** (ESI<sup>+</sup>) Calcd. For C<sub>31</sub>H<sub>23</sub>N<sub>3</sub>O<sub>2</sub>SNa<sup>+</sup> ([M+Na]<sup>+</sup>): 524.1403, found: 524.1407.

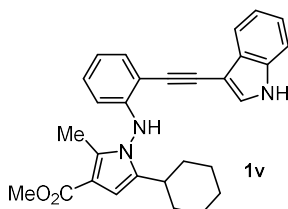

**methyl 1-((2-((1*H*-indol-3-yl)ethynyl)phenyl)amino)-5-cyclohexyl-2-methyl-1*H*-pyrrole-3-carboxylate (1v):** 57% yield (1.29 g); Brown solid; m.p. 126-128 °C.

**<sup>1</sup>H NMR** (400 MHz, CDCl<sub>3</sub>) δ 8.54 (s, 1H), 7.78 (d, *J* = 7.7 Hz, 1H), 7.51 (dd, *J* = 8.9, 2.1 Hz, 2H), 7.45 – 7.38 (m, 1H), 7.31 – 7.25 (m, 1H), 7.24 (m, 2H), 7.18 – 7.07 (m, 1H), 6.90 (td, *J* = 7.5, 1.2 Hz, 1H), 6.32 (s, 1H), 6.04 (d, *J* = 8.2 Hz, 1H), 3.82 (s, 3H), 2.57 – 2.45 (m, 1H), 2.41 (s, 3H), 2.09 – 1.95 (m, 1H), 1.73 (d, *J* = 11.8 Hz, 3H), 1.45 – 1.10 (m, 6H).

**<sup>13</sup>C NMR** (101 MHz, CDCl<sub>3</sub>) δ 166.0, 147.2, 139.3, 136.2, 135.2, 131.9, 129.6, 128.3, 128.1, 123.3, 121.0, 120.6, 119.6, 111.6, 111.3, 109.5, 108.2, 103.0, 98.0, 90.1, 85.4, 50.8, 34.6, 26.4, 26.0, 10.6.

**HRMS** (ESI<sup>+</sup>) Calcd. For C<sub>29</sub>H<sub>29</sub>N<sub>3</sub>O<sub>2</sub>Na<sup>+</sup> ([M+Na]<sup>+</sup>): 474.2151, found: 474.2154.

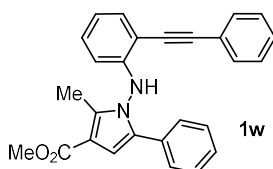

**methyl 2-methyl-5-phenyl-1-((2-(phenylethynyl)phenyl)amino)-1H-pyrrole-3-carboxylate (1w):** 90% yield (1.82 g); Brown solid; m.p. 117-119 °C.

**<sup>1</sup>H NMR** (400 MHz, CDCl<sub>3</sub>) δ 7.55 – 7.48 (m, 2H), 7.47 – 7.39 (m, 3H), 7.39 – 7.35 (m, 3H), 7.33 – 7.26 (m, 3H), 7.25 – 7.19 (m, 1H), 7.17 – 7.09 (m, 1H), 6.93 – 6.82 (m, 1H), 6.78 (s, 1H), 6.20 – 6.13 (m, 1H), 3.85 (s, 3H), 2.49 (s, 3H).

**<sup>13</sup>C NMR** (101 MHz, CDCl<sub>3</sub>) δ 165.5, 147.2, 138.4, 133.2, 132.2, 131.5, 130.8, 130.2, 128.8, 128.5, 128.4, 127.7, 127.3, 122.5, 120.7, 111.5, 110.7, 107.8, 107.3, 96.2, 83.9, 51.0, 10.7.

**HRMS** (ESI<sup>+</sup>) Calcd. For C<sub>27</sub>H<sub>23</sub>N<sub>2</sub>O<sub>2</sub><sup>+</sup> ([M+H]<sup>+</sup>): 407.1754, found: 407.1750.

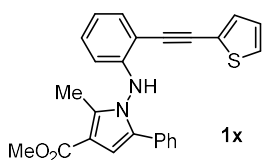

**Methyl 2-methyl-5-phenyl-1-((2-(thiophen-2-ylethynyl)phenyl)amino)-1H-pyrrole-3-carboxylate (1x):** 78% yield (980 mg); yellow solid; m.p. 134-136 °C.

**<sup>1</sup>H NMR** (400 MHz, CDCl<sub>3</sub>) δ 7.44 (d, *J* = 7.1 Hz, 2H), 7.38 (d, *J* = 7.7 Hz, 1H), 7.34 (d, *J* = 5.2 Hz, 1H), 7.31 – 7.21 (m, 5H), 7.17 – 7.13 (m, 1H), 7.05 – 7.03 (m, 1H), 6.87 – 6.84 (m, 1H), 6.78 (s, 1H), 6.15 (d, *J* = 8.2 Hz, 1H), 3.83 (s, 3H), 2.46 (s, 3H).

**<sup>13</sup>C NMR** (101 MHz, CDCl<sub>3</sub>) δ 165.5, 147.1, 138.3, 133.2, 132.3, 132.2, 130.8, 130.4, 128.4, 127.9, 127.6, 127.3, 127.2, 122.4, 120.7, 111.6, 110.7, 107.8, 107.0, 89.2, 87.5, 51.01, 10.8.

**HRMS** (ESI<sup>+</sup>) Calcd. For C<sub>25</sub>H<sub>20</sub>N<sub>2</sub>O<sub>2</sub>SN<sup>+</sup> ([M+Na]<sup>+</sup>): 434.1065, found: 434.1069.

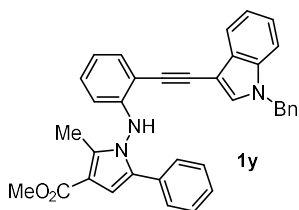

**N-(2-((1H-indol-3-yl)ethynyl)phenyl)-2-methyl-5-phenyl-1H-pyrrol-1-amine (1y):** 59% yi

eld (1.58 g); Brown solid; m.p. 130-132 °C.

**<sup>1</sup>H NMR** (400 MHz, CDCl<sub>3</sub>) δ 7.60 – 7.55 (m, 1H), 7.43 – 7.34 (m, 3H), 7.32 – 7.31 (m, 2H), 7.27 – 7.18 (m, 7H), 7.16 – 7.01 (m, 5H), 6.82 – 6.75 (m, 1H), 6.70 (s, 1H), 6.14 – 6.05 (m, 1H), 5.23 (s, 2H), 3.77 (s, 3H), 2.42 (s, 3H).

**<sup>13</sup>C NMR** (101 MHz, CDCl<sub>3</sub>) δ 165.6, 146.9, 138.4, 136.3, 135.8, 133.3, 131.9, 131.7, 130.9, 129.5, 129.1, 128.9, 128.4, 128.0, 127.7, 127.3, 127.0, 123.1, 120.9, 120.6, 119.9, 111.3, 110.6, 110.2, 108.4, 107.7, 97.0, 90.1, 85.6, 51.0, 50.4, 10.8.

**HRMS** (ESI+) Calcd. For C<sub>36</sub>H<sub>29</sub>N<sub>3</sub>O<sub>2</sub>Na<sup>+</sup> ([M+Na]<sup>+</sup>): 558.2151, found: 558.2154.

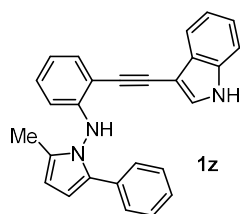

**N-(2-((1H-indol-3-yl)ethynyl)phenyl)-2-methyl-5-phenyl-1H-pyrrol-1-amine (1z)**: 50% yield (0.97 g); Brown solid; m.p. 99-101 °C.

**<sup>1</sup>H NMR** (400 MHz, CDCl<sub>3</sub>) δ 8.20 (s, 1H), 7.70 – 7.57 (m, 1H), 7.47 – 7.42 (m, 2H), 7.41 – 7.38 (m, 1H), 7.37 (d, *J* = 1.5 Hz, 1H), 7.34 – 7.32 (m, 0H), 7.32 – 7.28 (m, 2H), 7.22 – 7.17 (m, 4H), 7.15 – 7.03 (m, 3H), 6.78 - 6.74 (m, 1H), 6.26 (d, *J* = 3.9 Hz, 1H), 6.18 – 6.10 (m, 1H), 5.96 (dd, *J* = 3.9, 1.0 Hz, 1H), 2.11 (s, 1H).

**<sup>13</sup>C NMR** (101 MHz, CDCl<sub>3</sub>) δ 147.9, 135.2, 133.1, 132.1, 131.8, 131.2, 129.6, 128.32, 128.26, 127.9, 127.2, 126.4, 123.3, 121.0, 120.0, 119.8, 111.5, 107.9, 106.2, 105.5, 98.3, 89.6, 85.8, 11.4.

**HRMS** (ESI+) Calcd. For C<sub>27</sub>H<sub>22</sub>N<sub>3</sub><sup>+</sup> ([M+H]<sup>+</sup>): 388.1808, found: 388.1809.



### 3. Procedure for the synthesis of products 2 and characterization data

#### General Procedure for the Synthesis of Products 2:

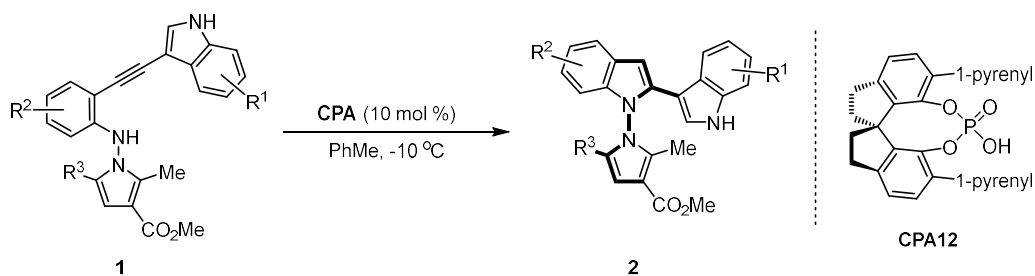

Following the general procedure, *o*-alkynylanilines **1** (0.2mmol), chiral phosphoric acid (*S*)-CPA **12** (14.4 mg, 0.02 mmol) were added to a dried tube. Then, toluene (2 mL) was added to the reaction mixture, which was stirred at -10 °C for 12 h. After the completion of the reaction indicated by TLC, the reaction mixture was further purified through flash chromatography (petroleum ether/EtOAc) to afford pure product **2**.

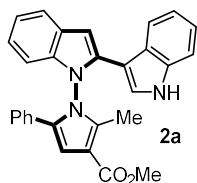

#### methyl (*S*)-1-(1*H*,1'*H*-[2,3'-biindol]-1-yl)-2-methyl-5-phenyl-1*H*-pyrrole-3-carboxylate (**2a**):

Flash column chromatography eluent (petroleum ether/ ethyl acetate = 20/1); 90% yield (80.1 mg); white solid; m.p. = 119-121 °C;  $[\alpha]_D^{30} = -26.0$  (*c* 1.22, acetone); The product was analyzed by HPLC to determine the enantiomeric excess: 95:5 er (Chiralcel OD-H, *i*-propanol/hexane = 95/5, flow rate 1.0 mL/min, T = 20 °C,  $\lambda = 254$  nm);  $t_R = 23.5$  min (minor),  $t_R = 27.6$  min (major).

**<sup>1</sup>H NMR** (400 MHz, CDCl<sub>3</sub>)  $\delta$  8.16 (s, 1H), 8.06 – 7.97 (m, 1H), 7.71 – 7.62 (m, 1H), 7.43 – 7.34 (m, 1H), 7.29 – 7.26 (m, 1H), 7.24 (d, *J* = 2.3 Hz, 1H), 7.21 – 7.12 (m, 2H), 7.10 – 7.01 (m, 6H), 6.99 (s, 1H), 6.96 – 6.88 (m, 1H), 6.35 (d, *J* = 2.7 Hz, 1H), 3.86 (s, 3H), 2.04 (s, 3H).  
**<sup>13</sup>C NMR** (101 MHz, CDCl<sub>3</sub>)  $\delta$  165.4, 138.8, 136.6, 135.9, 134.4, 133.4, 129.9, 128.6, 127.4, 126.5, 126.2, 125.8, 123.04, 122.95, 121.6, 121.5, 120.9, 120.4, 120.0, 111.6, 111.4, 108.6,

108.0, 106.2, 100.1, 51.2, 10.1.

**HRMS** (ESI-TOF) Calcd. For  $C_{29}H_{24}N_3O_2^+$  ( $[M+H]^+$ ): 446.1863, found: 446.1867;

### HPLC chromatogram of compound 2a

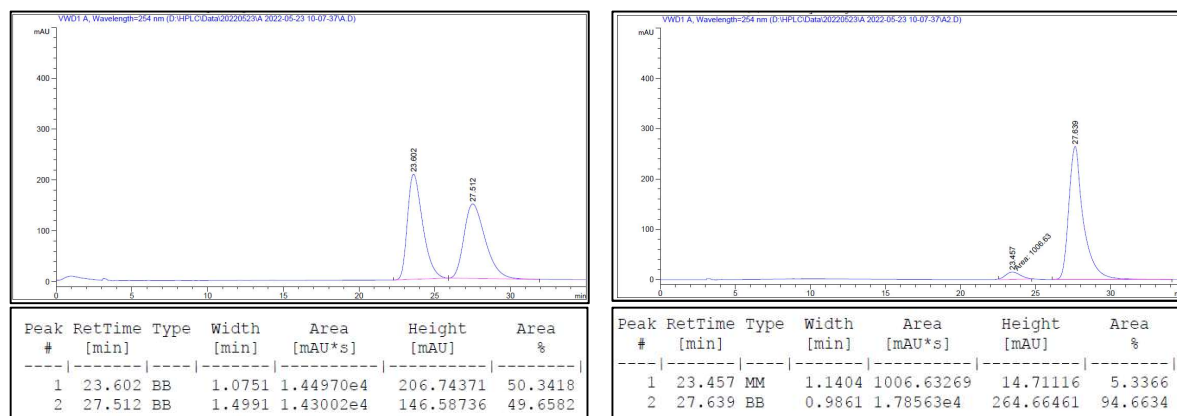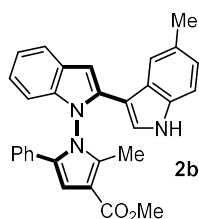

### methyl (*S*)-2-methyl-1-(5'-methyl-1*H*,1'*H*-[2,3'-biindol]-1-yl)-5-phenyl-1*H*-pyrrole-3-carboxylate (**2b**):

Flash column chromatography eluent (petroleum ether/ ethyl acetate = 20/1); 87% yield (79.9 mg); white solid; m.p. = 114-126 °C;  $[\alpha]_D^{30} = -18.7$  (*c* 0.85, acetone); The product was analyzed by HPLC to determine the enantiomeric excess: 95:5 er (Chiralcel OD-H, *i*-propanol/hexane = 95/5, flow rate 1.0 mL/min, T = 20 °C,  $\lambda = 254$  nm);  $t_R = 21.6$  min (minor),  $t_R = 28.2$  min (major).

**<sup>1</sup>H NMR** (400 MHz, CDCl<sub>3</sub>)  $\delta$  8.07 (s, 1H), 7.78 (s, 1H), 7.71 – 7.65 (m, 1H), 7.29 – 7.25 (m, 1H), 7.22 – 7.12 (m, 2H), 7.12 – 7.02 (m, 7H), 6.98 (s, 1H), 6.95 – 6.90 (m, 1H), 6.33 (d, *J* = 2.8 Hz, 1H), 3.86 (s, 3H), 2.52 (s, 3H), 2.04 (s, 3H).

**<sup>13</sup>C NMR** (101 MHz, CDCl<sub>3</sub>)  $\delta$  165.3, 138.9, 136.6, 134.7, 134.2, 133.4, 130.3, 129.9, 128.6, 127.4, 126.5, 126.3, 126.0, 124.5, 123.0, 121.6, 120.4, 119.7, 111.6, 111.0, 108.5, 108.0, 105.7, 100.0, 51.2, 21.7, 10.1.

**HRMS** (ESI-TOF) Calcd. For  $C_{30}H_{26}N_3O_2^+$  ( $[M+H]^+$ ): 460.2019, found: 460.2014.

## HPLC chromatogram of compound 2b

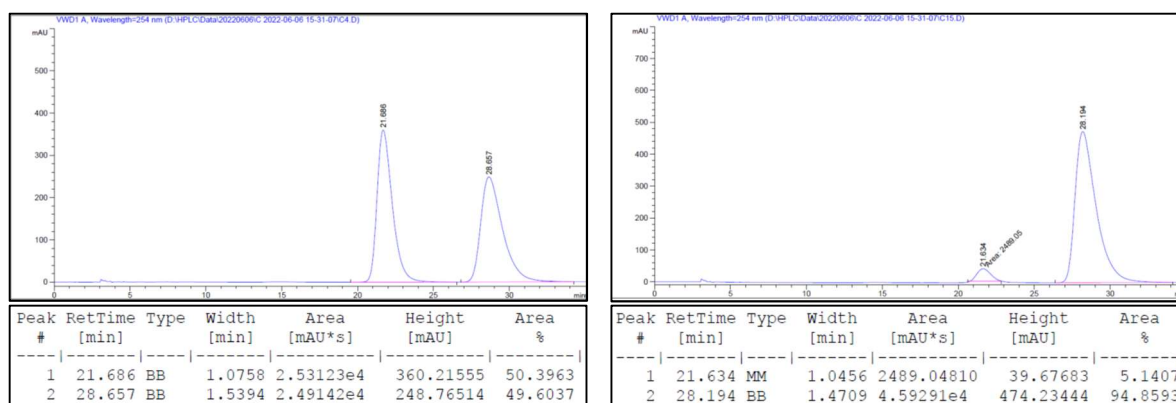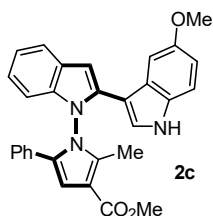

## methyl (*S*)-1-(5'-methoxy-1*H*,1'*H*-[2,3'-biindol]-1-yl)-2-methyl-5-phenyl-1*H*-pyrrole-3-carboxylate (**2c**):

Flash column chromatography eluent (petroleum ether/ ethyl acetate = 20/1); 97% yield (90.3 mg); white solid; m.p. = 103-105 °C;  $[\alpha]_D^{30} = -18.5$  (*c* 1.25, acetone); The product was analyzed by HPLC to determine the enantiomeric excess: 93:7 er (Chiralcel OD-H, *i*-propanol/hexane = 95/5, flow rate 1.0 mL/min, T = 20 °C,  $\lambda = 254$  nm);  $t_R = 34.5$  min (minor),  $t_R = 40.5$  min (major).

**<sup>1</sup>H NMR** (400 MHz, CDCl<sub>3</sub>)  $\delta$  8.12 (s, 1H), 7.75 – 7.61 (m, 1H), 7.40 (d, *J* = 2.4 Hz, 1H), 7.25 – 7.22 (m, 1H), 7.22 – 7.11 (m, 2H), 7.09 – 6.98 (m, 6H), 6.96 (s, 1H), 6.95 – 6.88 (m, 2H), 6.34 (d, *J* = 2.9 Hz, 1H), 3.91 (s, 3H), 3.85 (s, 3H), 2.05 (s, 3H).

**<sup>13</sup>C NMR** (101 MHz, CDCl<sub>3</sub>)  $\delta$  165.4, 155.0, 138.8, 136.6, 134.6, 133.4, 130.9, 129.9, 128.5, 127.4, 126.5, 126.3, 126.2, 123.0, 122.2, 121.6, 120.4, 113.0, 112.0, 111.5, 108.6, 107.9, 105.8, 102.0, 99.8, 56.0, 51.2, 10.1.

**HRMS** (ESI-TOF) Calcd. For C<sub>30</sub>H<sub>26</sub>N<sub>3</sub>O<sub>3</sub><sup>+</sup> ([M+H]<sup>+</sup>): 476.1968, found: 476.1960.

## HPLC chromatogram of compound 2c

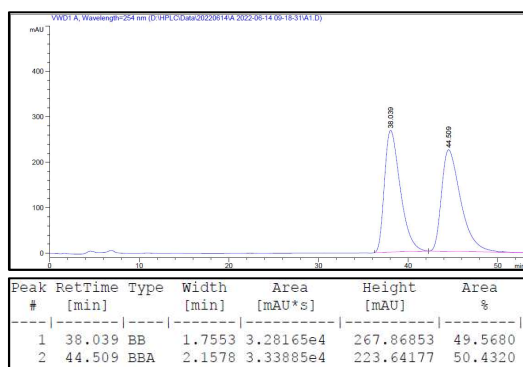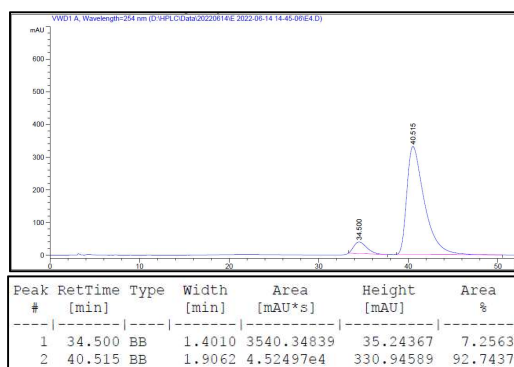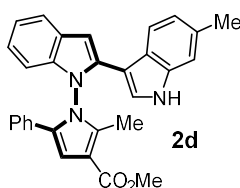

**methyl (*S*)-2-methyl-1-(6'-methyl-1*H*,1'*H*-[2,3'-biindol]-1-yl)-5-phenyl-1*H*-pyrrole-3-carboxylate (**2d**):**

Flash column chromatography eluent (petroleum ether/ ethyl acetate = 20/1); 90% yield (82.6 mg); white solid; m.p. = 107-109 °C;  $[\alpha]_D^{30} = -18.5$  (*c* 1.25, acetone); The product was analyzed by HPLC to determine the enantiomeric excess: 91:9 er (Chiralcel OD-H, *i*-propanol/hexane = 95/5, flow rate 1.0 mL/min, T = 20 °C,  $\lambda = 254$  nm);  $t_R = 7.8$  min (minor),  $t_R = 16.1$  min (major).

**<sup>1</sup>H NMR** (400 MHz, CDCl<sub>3</sub>)  $\delta$  8.01 (m, 1H), 7.90 (d, *J* = 8.2 Hz, 1H), 7.73 – 7.61 (m, 1H), 7.21 – 7.11 (m, 3H), 7.11 – 7.06 (m, 4H), 7.05 – 7.01 (m, 3H), 6.99 (s, 1H), 6.94 – 6.88 (m, 1H), 6.28 (d, *J* = 2.7 Hz, 1H), 3.86 (s, 3H), 2.47 (s, 3H), 2.03 (s, 3H).

**<sup>13</sup>C NMR** (101 MHz, CDCl<sub>3</sub>)  $\delta$  165.4, 138.9, 136.6, 136.4, 134.7, 133.4, 132.9, 130.0, 128.6, 127.4, 126.6, 126.3, 123.6, 123.0, 122.7, 121.6, 120.9, 120.4, 119.7, 111.6, 111.3, 108.5, 108.0, 106.1, 100.1, 51.2, 21.6, 10.1.

**HRMS** (ESI-TOF) Calcd. For C<sub>30</sub>H<sub>26</sub>N<sub>3</sub>O<sub>2</sub><sup>+</sup> ([M+H]<sup>+</sup>): 460.2019, found: 460.2015;

**HPLC chromatogram of compound 2d**

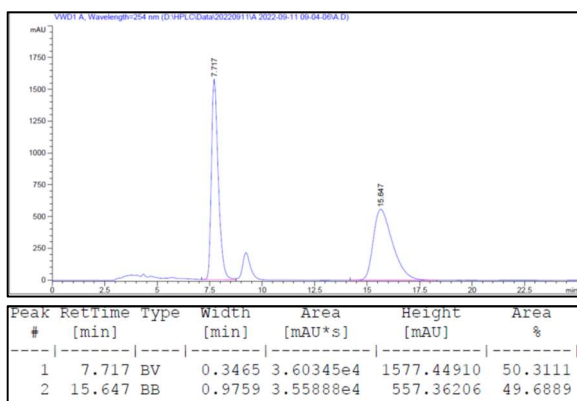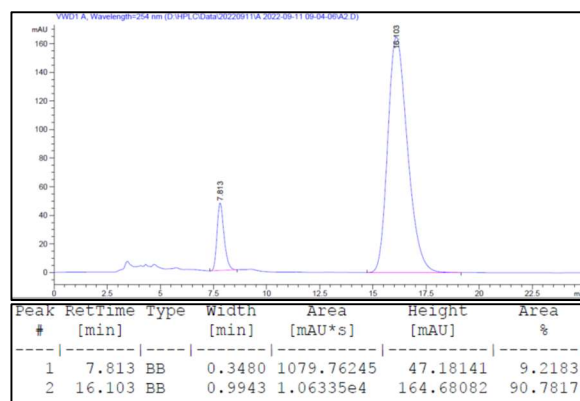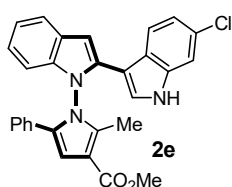

**methyl (*S*)-1-(6'-chloro-1*H*,1'*H*-[2,3'-biindol]-1-yl)-2-methyl-5-phenyl-1*H*-pyrrole-3-carboxylate (**2e**):**

Flash column chromatography eluent (petroleum ether/ ethyl acetate = 20/1); 95% yield (91.0 mg); white solid; m.p. = 100-102 °C;  $[\alpha]_D^{30} = -29.17$  (*c* 0.79, acetone); The product was analyzed by HPLC to determine the enantiomeric excess: 93:7 er (Chiralcel OD-H, *i*-propanol/hexane = 95/5, flow rate 1.0 mL/min, *T* = 20 °C,  $\lambda$  = 254 nm);  $t_R$  = 22.4 min (minor),  $t_R$  = 33.9 min (major).

**<sup>1</sup>H NMR** (400 MHz, CDCl<sub>3</sub>)  $\delta$  8.34 – 8.14 (m, 1H), 7.84 (d, *J* = 8.6 Hz, 1H), 7.72 – 7.62 (m, 1H), 7.34 (d, *J* = 1.8 Hz, 1H), 7.22 – 7.13 (m, 3H), 7.08 – 7.00 (m, 6H), 6.98 – 6.88 (m, 2H), 6.32 (d, *J* = 2.7 Hz, 1H), 3.86 (s, 3H), 2.05 (s, 3H).

**<sup>13</sup>C NMR** (101 MHz, CDCl<sub>3</sub>)  $\delta$  165.4, 138.7, 136.7, 136.2, 133.8, 133.5, 129.8, 128.8, 128.6, 127.5, 126.3, 126.2, 124.4, 123.3, 122.0, 121.8, 121.5, 120.8, 120.6, 111.6, 111.3, 108.6, 108.0, 106.3, 100.4, 51.3, 10.1.

**HRMS** (ESI-TOF) Calcd. For C<sub>29</sub>H<sub>23</sub>N<sub>3</sub>O<sub>2</sub>Cl<sup>+</sup> ([*M*+*H*]<sup>+</sup>): 481.1551, found: 481.1560.

**HPLC chromatogram of compound 2e**

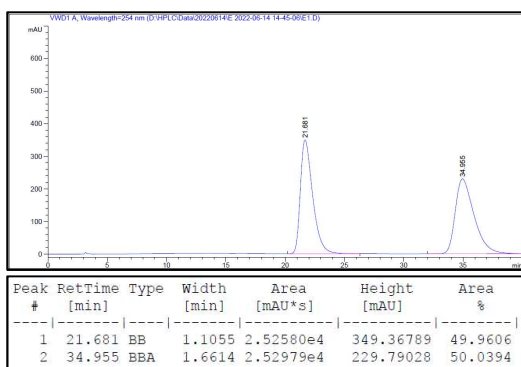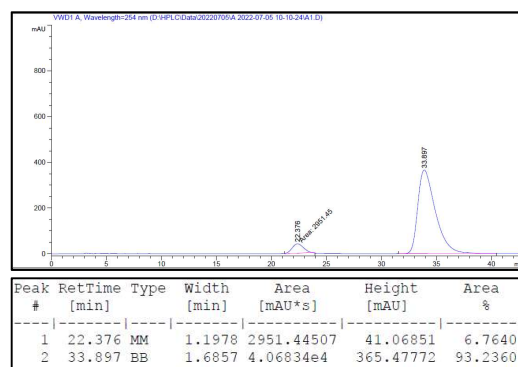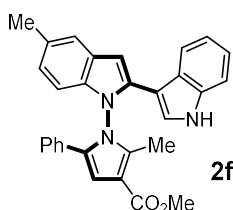

**methyl (*S*)-2-methyl-1-(5-methyl-1*H*,1'*H*-[2,3'-biindol]-1-yl)-5-phenyl-1*H*-pyrrole-3-carboxylate (**2f**):**

Flash column chromatography eluent (petroleum ether/ ethyl acetate = 20/1); 88% yield (80.8 mg); white solid; m.p. = 103-105 °C;  $[\alpha]_D^{30} = -26.44$  (*c* 1.18, acetone); The product was analyzed by HPLC to determine the enantiomeric excess: 91:9 er (Chiralcel AD-H, *i*-propanol/hexane =70/30, flow rate 1.0 mL/min, T = 20 °C,  $\lambda = 254$  nm);  $t_R = 10.5$  min (minor),  $t_R = 7.9$  min (major).

**<sup>1</sup>H NMR** (400 MHz, CDCl<sub>3</sub>)  $\delta$  8.07 (s, 1H), 7.96 – 7.90 (m, 1H), 7.43 – 7.35 (m, 1H), 7.32 – 7.25 (m, 1H), 7.21 – 7.18 (m, 1H), 7.17 – 7.13 (m, 1H), 7.05 – 6.87 (m, 8H), 6.75 (d, *J* = 8.2 Hz, 1H), 6.26 (d, *J* = 2.8 Hz, 1H), 3.78 (s, 3H), 2.38 (s, 3H), 1.95 (s, 3H).

**<sup>13</sup>C NMR** (101 MHz, CDCl<sub>3</sub>)  $\delta$  165.4, 138.9, 135.9, 135.0, 134.5, 133.4, 131.0, 130.0, 128.6, 127.4, 126.8, 126.2, 125.8, 124.5, 122.9, 121.4, 120.8, 120.3, 120.0, 111.5, 111.3, 108.3, 107.9, 106.3, 99.8, 51.2, 21.5, 10.1.

**HRMS** (ESI-TOF) Calcd. For C<sub>30</sub>H<sub>26</sub>N<sub>3</sub>O<sub>2</sub><sup>+</sup> ([M+H]<sup>+</sup>): 460.2019, found: 460.2016.

**HPLC chromatogram of compound 2f**

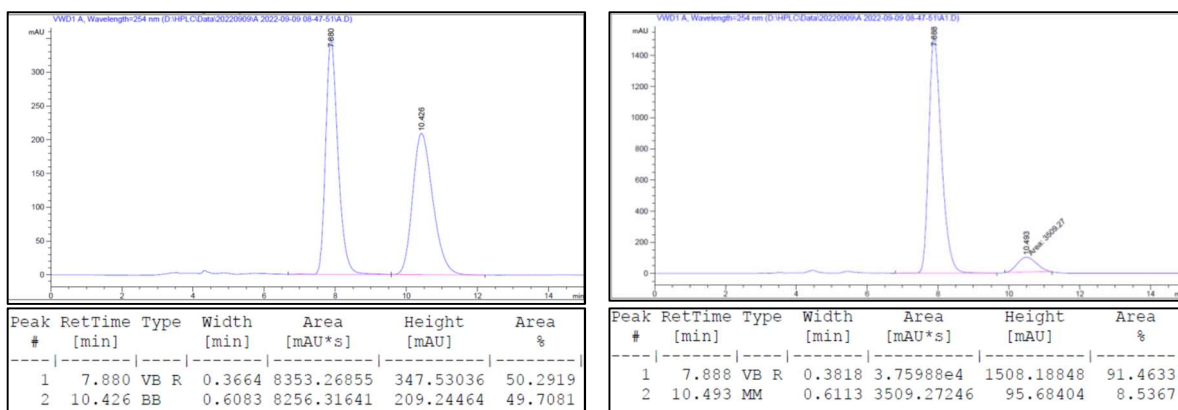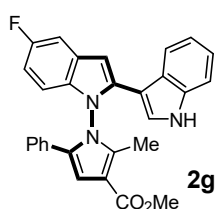

**methyl (*S*)-1-(5-fluoro-1*H*,1'*H*-[2,3'-biindol]-1-yl)-2-methyl-5-phenyl-1*H*-pyrrole-3-carboxylate (**2g**):**

Flash column chromatography eluent (petroleum ether/ ethyl acetate = 20/1); 90% yield (83.3 mg); white solid; m.p. = 107-109 °C;  $[\alpha]_D^{30} = -43.6$  (*c* 1.05, acetone); The product was analyzed by HPLC to determine the enantiomeric excess: 91:9 er (Chiralcel AD-H, *i*-propanol/hexane = 70/30, flow rate 1.0 mL/min, T = 20 °C,  $\lambda = 254$  nm);  $t_R = 6.1$  min (minor),  $t_R = 8.7$  min (major).

**<sup>1</sup>H NMR** (400 MHz, CDCl<sub>3</sub>)  $\delta$  8.14 (s, 1H), 7.95 – 7.89 (m, 1H), 7.35 – 7.28 (m, 1H), 7.27 – 7.21 (m, 1H), 7.21 – 7.18 (m, 1H), 7.17 (d, *J* = 5.3 Hz, 1H), 7.00 – 6.94 (m, 6H), 6.91 (s, 1H), 6.85 – 6.71 (m, 2H), 6.28 (d, *J* = 2.8 Hz, 1H), 3.79 (s, 3H), 1.97 (s, 3H).

**<sup>13</sup>C NMR** (101 MHz, CDCl<sub>3</sub>)  $\delta$  165.3, 159.0 (d, *J* = 237.0 Hz), 138.6, 136.0 (d, *J* = 33.2 Hz), 133.2 (d, *J* = 26.7 Hz), 129.8, 128.6, 127.5, 127.0 (d, *J* = 10.6 Hz), 126.2, 125.6, 123.1, 121.7, 121.0, 120.0, 111.8, 111.4, 111.1 (d, *J* = 26.4 Hz), 109.2 (d, *J* = 9.7 Hz), 108.1, 106.0, 105.7 (d, *J* = 24.3 Hz), 99.9 (d, *J* = 4.4 Hz), 51.2, 10.1.

**<sup>19</sup>F NMR** (376 MHz, CDCl<sub>3</sub>)  $\delta$  -119.99 – -125.38 (m, 1F).

**HRMS** (ESI-TOF) Calcd. For C<sub>29</sub>H<sub>22</sub>N<sub>3</sub>O<sub>2</sub>FNa<sup>+</sup> ([M+Na]<sup>+</sup>): 486.1588, found: 486.1582.

**HPLC chromatogram of compound 2g**

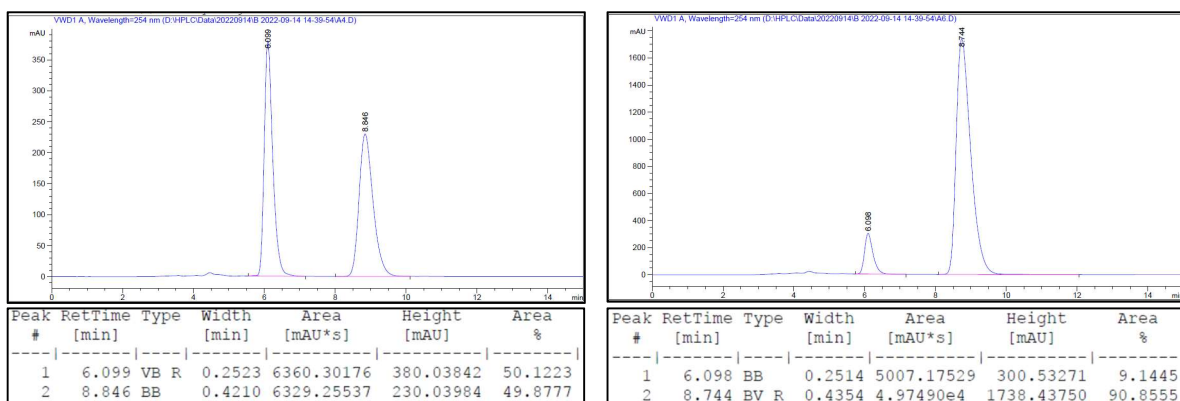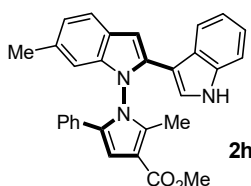

**methyl (*S*)-2-methyl-1-(6-methyl-1*H*,1'*H*-[2,3'-biindol]-1-yl)-5-phenyl-1*H*-pyrrole-3-carboxylate (**2h**):**

Flash column chromatography eluent (petroleum ether/ ethyl acetate = 20/1); 96% yield (88.1 mg); white solid; m.p. = 170-172 °C;  $[\alpha]_D^{30} = -28.4$  (*c* 1.07, acetone); The product was analyzed by HPLC to determine the enantiomeric excess: 95:5 er (Chiralcel AD-H, *i*-propanol/hexane = 70/30, flow rate 1.0 mL/min, T = 20 °C,  $\lambda = 254$  nm);  $t_R = 4.5$  min (minor),  $t_R = 6.1$  min (major).

**<sup>1</sup>H NMR** (400 MHz, CDCl<sub>3</sub>)  $\delta$  8.15 (s, 1H), 8.03 – 7.92 (m, 1H), 7.55 (d, *J* = 8.0 Hz, 1H), 7.37 – 7.33 (m, 1H), 7.25 – 7.19 (m, 2H), 7.12 – 7.06 (m, 2H), 7.06 – 7.01 (m, 5H), 7.00 (d, *J* = 4.4 Hz, 1H), 6.71 (dd, *J* = 1.6, 0.9 Hz, 1H), 6.32 (d, *J* = 2.7 Hz, 1H), 3.86 (s, 3H), 2.38 (s, 3H), 2.04 (s, 3H).

**<sup>13</sup>C NMR** (101 MHz, CDCl<sub>3</sub>)  $\delta$  165.4, 139.0, 137.1, 135.8, 133.8, 133.3, 133.2, 129.9, 128.6, 127.3, 126.2, 125.8, 124.3, 123.4, 122.9, 121.2, 120.8, 120.1, 120.0, 111.5, 111.3, 108.5, 107.9, 106.3, 100.1, 51.2, 21.8, 10.1.

**HRMS** (ESI-TOF) Calcd. For C<sub>30</sub>H<sub>26</sub>N<sub>3</sub>O<sub>2</sub><sup>+</sup> ([M+H]<sup>+</sup>): 460.2019, found: 460.2020.

**HPLC chromatogram of compound 2h**



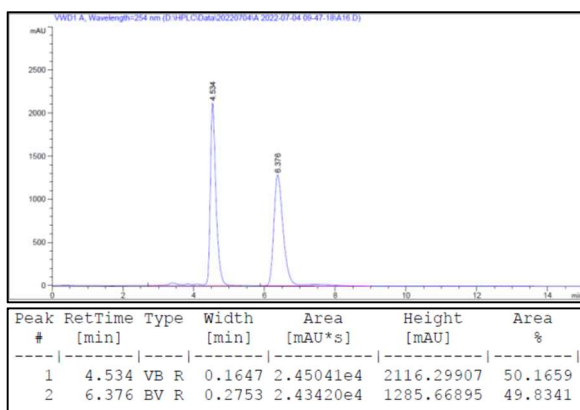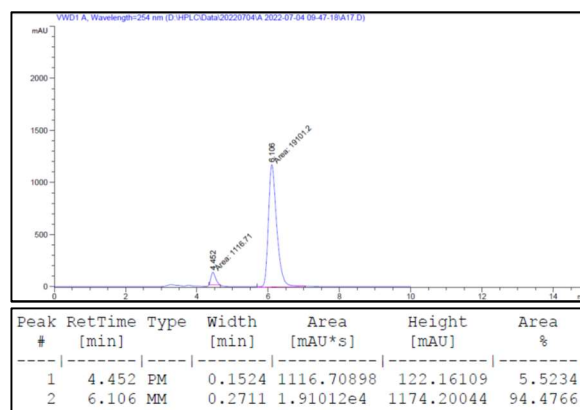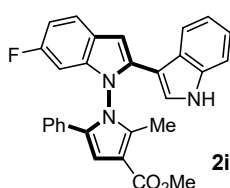

**methyl (S)-1-(6-fluoro-1H,1'H-[2,3'-biindol]-1-yl)-2-methyl-5-phenyl-1H-pyrrole-3-carboxylate (2i):**

Flash column chromatography eluent (petroleum ether/ ethyl acetate = 20/1); 97% yield (89.8 mg); white solid; m.p. = 100-102 °C;  $[\alpha]_D^{30} = -33.8$  (*c* 1.03, acetone); The product was analyzed by HPLC to determine the enantiomeric excess: 95:5 er (Chiralcel AD-H, *i*-propanol/hexane =70/30, flow rate 1.0 mL/min, T = 20 °C,  $\lambda = 254$  nm);  $t_R = 4.8$  min (minor),  $t_R = 5.7$  min (major).

**$^1\text{H NMR}$**  (400 MHz,  $\text{CDCl}_3$ )  $\delta$  8.27 – 8.12 (m, 1H), 8.07 – 7.94 (m, 1H), 7.57 (dd,  $J = 8.6, 5.0$  Hz, 1H), 7.41 – 7.34 (m, 1H), 7.30 – 7.25 (m, 2H), 7.10 – 7.02 (m, 6H), 6.98 (s, 1H), 6.96 – 6.88 (m, 1H), 6.61 (dd,  $J = 8.9, 2.3$  Hz, 1H), 6.35 (d,  $J = 2.8$  Hz, 1H), 3.87 (s, 3H), 2.06 (s, 3H).

**$^{13}\text{C NMR}$**  (101 MHz,  $\text{CDCl}_3$ )  $\delta$  165.3, 160.4 (d,  $J = 240.8$  Hz), 138.5, 136.8 (d,  $J = 12.2$  Hz), 135.9, 135.2, 133.2, 129.7, 128.6, 127.5, 126.3, 125.6, 123.0, 122.8, 121.4, 121.3, 121.0, 119.9, 111.8, 111.4, 110.2 (d,  $J = 24.2$  Hz), 108.2, 106.0, 99.9, 95.5 (d,  $J = 27.4$  Hz), 51.3, 10.1.

**$^{19}\text{F NMR}$**  (376 MHz,  $\text{CDCl}_3$ )  $\delta$  -111.82 – -125.10 (m, 1F).

**HRMS** (ESI-TOF) Calcd. For  $\text{C}_{29}\text{H}_{22}\text{N}_3\text{O}_2\text{FNa}^+$  ( $[\text{M}+\text{Na}]^+$ ): 486.1588, found: 486.1592.

**HPLC chromatogram of compound 2i**

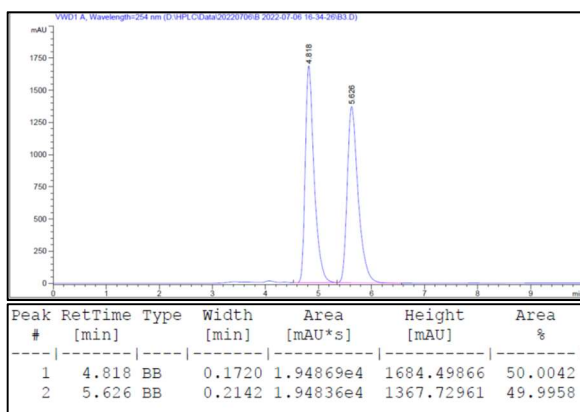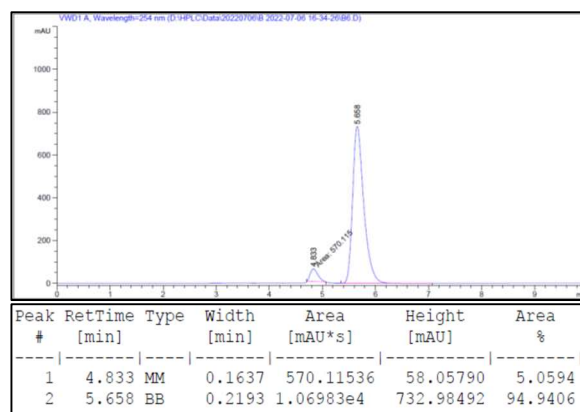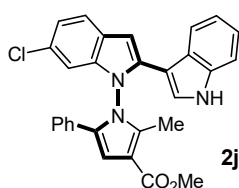

**methyl (S)-1-(6-chloro-1H,1'H-[2,3'-biindol]-1-yl)-2-methyl-5-phenyl-1H-pyrrole-3-carboxylate (2j):**

Flash column chromatography eluent (petroleum ether/ ethyl acetate = 20/1); 81% yield (77.6 mg); white solid; m.p. = 167-167 °C;  $[\alpha]_D^{30} = -29.7$  (*c* 1.17, acetone); The product was analyzed by HPLC to determine the enantiomeric excess: 95:5 er (Chiralcel AD-H, *i*-propanol/hexane = 95/5, flow rate 1.0 mL/min, T = 20 °C,  $\lambda = 254$  nm);  $t_R = 27.7$  min (minor),  $t_R = 35.6$  min (major).

**<sup>1</sup>H NMR** (400 MHz, CDCl<sub>3</sub>)  $\delta$  8.14 (s, 1H), 7.98 – 7.83 (m, 1H), 7.50 (d, *J* = 8.4 Hz, 1H), 7.36 – 7.27 (m, 2H), 7.23 – 7.19 (m, 1H), 7.08 (dd, *J* = 8.4, 1.8 Hz, 1H), 7.01 – 6.96 (m, 6H), 6.92 (s, 1H), 6.83 (d, *J* = 1.8 Hz, 1H), 6.28 (d, *J* = 2.8 Hz, 1H), 3.80 (s, 3H), 1.99 (s, 3H).

**<sup>13</sup>C NMR** (101 MHz, CDCl<sub>3</sub>)  $\delta$  165.2, 138.5, 137.0, 135.9, 135.4, 133.2, 129.7, 128.9, 128.6, 127.6, 126.2, 125.6, 125.0, 123.1, 122.5, 121.6, 121.4, 121.0, 119.9, 111.9, 111.4, 108.5, 108.2, 105.8, 99.9, 51.3, 10.1.

**HRMS** (ESI-TOF) Calcd. For C<sub>29</sub>H<sub>23</sub>N<sub>3</sub>O<sub>2</sub>Cl<sup>+</sup> ([M+H]<sup>+</sup>): 481.1551, found: 481.1547.

**HPLC chromatogram of compound 2j**

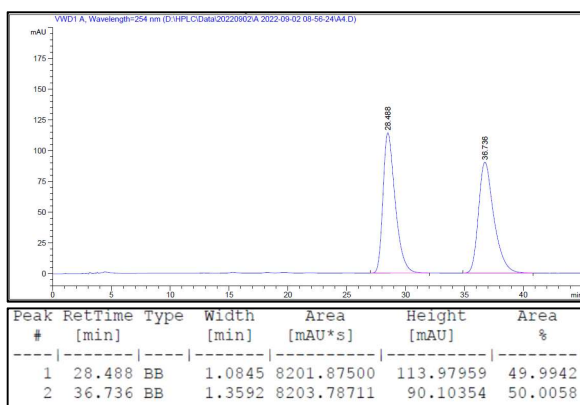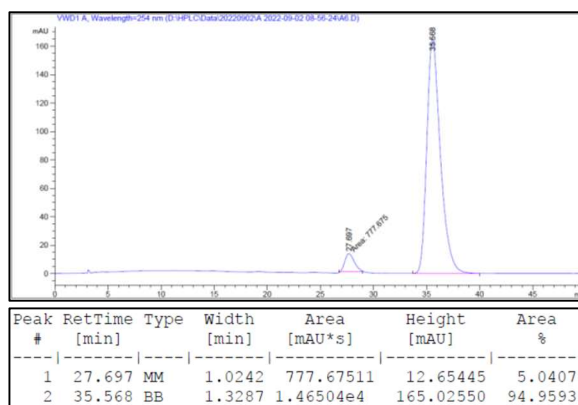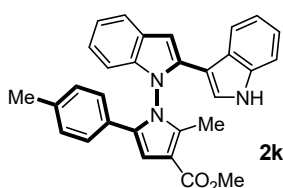

**methyl (*S*)-1-(1*H*,1'*H*-[2,3'-biindol]-1-yl)-2-methyl-5-(*p*-tolyl)-1*H*-pyrrole-3-carboxylate (**2k**):**

Flash column chromatography eluent (petroleum ether/ ethyl acetate = 20/1); 95% yield (87.2 mg); white solid; m.p. = 106-108 °C;  $[\alpha]_D^{30} = -44.5$  (*c* 1.16, acetone); The product was analyzed by HPLC to determine the enantiomeric excess: 94:6 er (Chiralcel AD-H, *i*-propanol/hexane =70/30, flow rate 1.0 mL/min, T = 20 °C,  $\lambda = 254$  nm);  $t_R = 6.2$  min (minor),  $t_R = 8.7$  min (major).

**<sup>1</sup>H NMR** (400 MHz, CDCl<sub>3</sub>)  $\delta$  8.19 (s, 1H), 8.09 – 7.96 (m, 1H), 7.75 – 7.63 (m, 1H), 7.40 – 7.32 (m, 1H), 7.29 – 7.26 (m, 1H), 7.25 – 7.22 (m, 1H), 7.21 – 7.11 (m, 2H), 7.08 (d, *J* = 0.9 Hz, 1H), 7.00 – 6.89 (m, 4H), 6.87 – 6.80 (m, 2H), 6.35 (d, *J* = 2.7 Hz, 1H), 3.85 (s, 3H), 2.13 (s, 3H), 2.02 (s, 3H).

**<sup>13</sup>C NMR** (101 MHz, CDCl<sub>3</sub>)  $\delta$  165.4, 138.6, 137.2, 136.6, 135.9, 134.5, 133.5, 129.3, 127.0, 126.5, 126.1, 125.8, 123.0, 122.9, 121.6, 121.5, 120.8, 120.4, 120.0, 111.5, 111.4, 108.6, 107.5, 106.2, 100.0, 51.2, 21.0, 10.1.

**HRMS** (ESI-TOF) Calcd. For C<sub>30</sub>H<sub>26</sub>N<sub>3</sub>O<sub>2</sub><sup>+</sup> ([M+H]<sup>+</sup>): 460.2019, found: 460.2020.

**HPLC chromatogram of compound 2k**

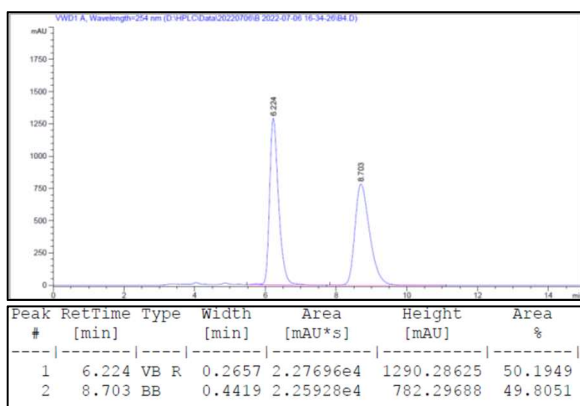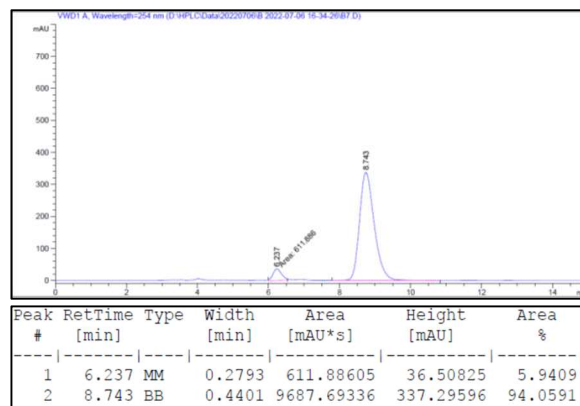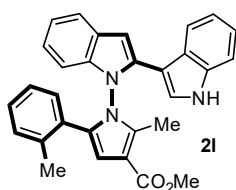

**methyl (S)-1-(1H,1'H-[2,3'-biindol]-1-yl)-2-methyl-5-(o-tolyl)-1H-pyrrole-3-carboxylate (2l):**

Flash column chromatography eluent (petroleum ether/ ethyl acetate = 20/1); 92% yield (84.5 mg); white solid; m.p. = 173-175 °C;  $[\alpha]_D^{30} = -33.8$  (*c* 1.02, acetone); The product was analyzed by HPLC to determine the enantiomeric excess: 91:9 er (Chiralcel AD-H, *i*-propanol/hexane =90/10, flow rate 1.0 mL/min, T = 20 °C,  $\lambda = 254$  nm);  $t_R = 16.2$  min (minor),  $t_R = 14.2$  min (major).

**$^1\text{H NMR}$**  (400 MHz,  $\text{CDCl}_3$ )  $\delta$  6.98 (s, 1H), 6.51 – 6.42 (m, 1H), 6.36 – 6.29 (m, 1H), 6.20 – 6.08 (m, 1H), 6.06 – 6.00 (m, 1H), 5.97 – 5.84 (m, 3H), 5.80 – 5.73 (m, 1H), 5.69 – 5.60 (m, 1H), 5.60 – 5.55 (m, 2H), 5.40 (s, 1H), 5.34 – 5.28 (m, 2H), 5.11 (d,  $J = 2.7$  Hz, 1H), 2.64 (s, 3H), 1.06 (s, 3H), 0.62 (s, 3H).

**$^{13}\text{C NMR}$**  (101 MHz,  $\text{CDCl}_3$ )  $\delta$  165.7, 137.32, 137.30, 137.1, 135.8, 134.4, 131.9, 130.0, 129.4, 128.7, 127.9, 126.4, 125.9, 124.9, 122.9, 122.7, 121.4, 121.3, 120.8, 120.5, 120.1, 111.2, 110.8, 109.9, 108.5, 106.7, 100.2, 51.2, 19.9, 10.7.

**HRMS** (ESI-TOF) Calcd. For  $\text{C}_{30}\text{H}_{26}\text{N}_3\text{O}_2^+$  ( $[\text{M}+\text{H}]^+$ ): 460.2019, found: 460.2015.

**HPLC chromatogram of compound 2l**

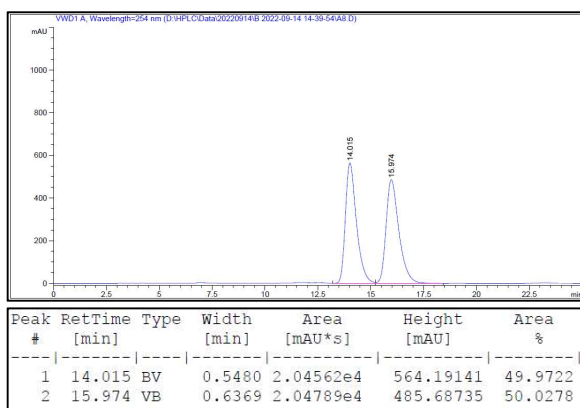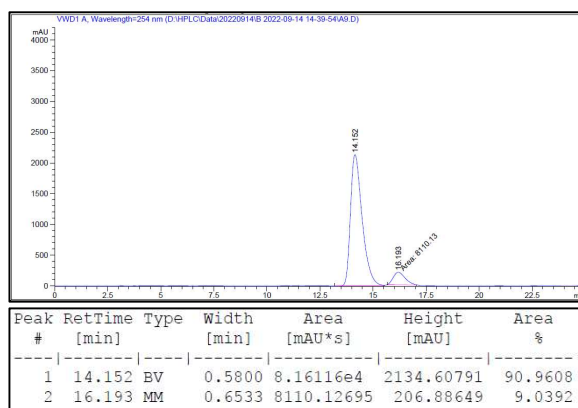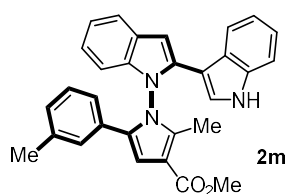

**methyl (*S*)-1-(1*H*,1'*H*-[2,3'-biindol]-1-yl)-2-methyl-5-(*m*-tolyl)-1*H*-pyrrole-3-carboxylate (**2m**):**

Flash column chromatography eluent (petroleum ether/ ethyl acetate = 20/1); 93% yield (85.4 mg); white solid; m.p. = 176-178 °C;  $[\alpha]_D^{30} = -32.1$  (*c* 1.17, acetone); The product was analyzed by HPLC to determine the enantiomeric excess: 95:5 er (Chiralcel AD-H, *i*-propanol/hexane = 70/30, flow rate 1.0 mL/min, T = 20 °C,  $\lambda = 254$  nm);  $t_R = 4.8$  min (minor),  $t_R = 6.8$  min (major).

**<sup>1</sup>H NMR** (400 MHz, CDCl<sub>3</sub>)  $\delta$  8.19 (s, 1H), 8.05 – 7.95 (m, 1H), 7.75 – 7.62 (m, 1H), 7.42 – 7.32 (m, 1H), 7.28 – 7.25 (m, 1H), 7.24 – 7.20 (m, 1H), 7.19 – 7.12 (m, 2H), 7.07 (s, 1H), 6.96 (s, 1H), 6.95 – 6.91 (m, 1H), 6.90 – 6.82 (m, 3H), 6.81 – 6.77 (m, 1H), 6.36 (d, *J* = 2.8 Hz, 1H), 3.86 (s, 3H), 2.07 (s, 3H), 2.02 (s, 3H).

**<sup>13</sup>C NMR** (101 MHz, CDCl<sub>3</sub>)  $\delta$  165.4, 138.7, 138.0, 136.7, 135.9, 134.5, 133.6, 129.7, 128.4, 128.2, 127.3, 126.5, 125.8, 123.1, 123.0, 122.9, 121.6, 121.5, 120.8, 120.4, 120.0, 111.5, 111.3, 108.6, 107.8, 106.2, 100.1, 51.2, 21.2, 10.1.

**HRMS** (ESI-TOF) Calcd. For C<sub>30</sub>H<sub>26</sub>N<sub>3</sub>O<sub>2</sub><sup>+</sup> ([M+H]<sup>+</sup>): 460.2019, found: 460.2016.

**HPLC chromatogram of compound 2m**

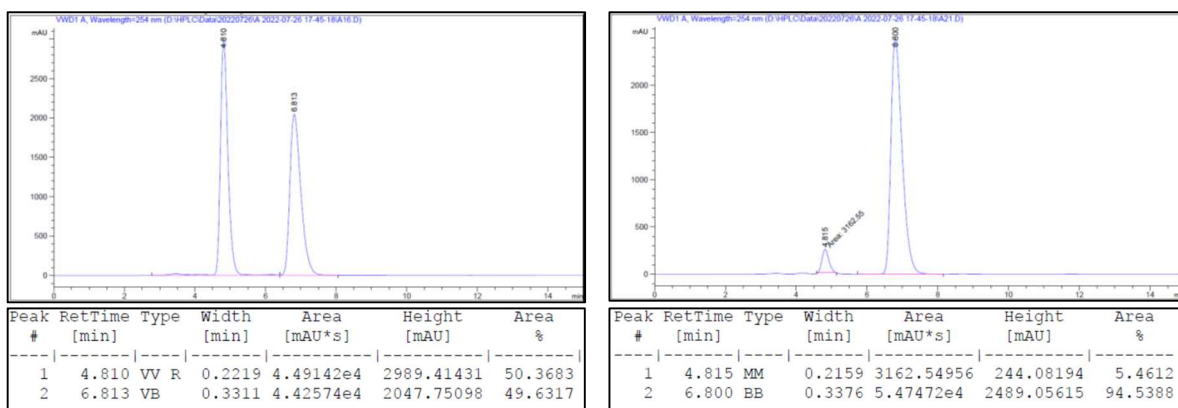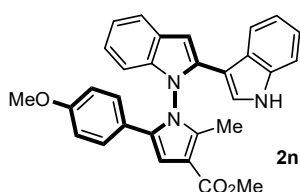

**methyl (S)-1-(1H,1'H-[2,3'-biindol]-1-yl)-5-(4-methoxyphenyl)-2-methyl-1H-pyrrole-3-carboxylate (2n):**

Flash column chromatography eluent (petroleum ether/ ethyl acetate = 20/1); 96% yield (91.2 mg); white solid; m.p. = 100-102 °C;  $[\alpha]_D^{30} = -37.5$  (*c* 1.26, acetone); The product was analyzed by HPLC to determine the enantiomeric excess: 95:5 er (Chiralcel AD-H, *i*-propanol/hexane =70/30, flow rate 1.0 mL/min, T = 20 °C,  $\lambda = 254$  nm);  $t_R = 7.0$  min (minor),  $t_R = 12.9$  min (major).

**<sup>1</sup>H NMR** (400 MHz, CDCl<sub>3</sub>)  $\delta$  8.20 (s, 1H), 8.07 – 7.98 (m, 1H), 7.72 – 7.61 (m, 1H), 7.42 – 7.32 (m, 1H), 7.30 – 7.25 (m, 2H), 7.23 – 7.13 (m, 2H), 7.10 – 7.05 (m, 1H), 7.00 – 6.91 (m, 3H), 6.88 (s, 1H), 6.58 – 6.49 (m, 2H), 6.34 (d, *J* = 2.7 Hz, 1H), 3.86 (s, 3H), 3.61 (s, 3H), 2.04 (s, 3H).

**<sup>13</sup>C NMR** (101 MHz, CDCl<sub>3</sub>)  $\delta$  165.5, 158.9, 138.2, 136.6, 135.9, 134.5, 133.4, 127.7, 126.5, 125.7, 123.0, 122.9, 122.5, 121.6, 121.5, 120.9, 120.4, 120.0, 114.0, 111.39, 111.36, 108.6, 107.0, 106.2, 100.0, 55.0, 51.2, 10.1.

**HRMS** (ESI-TOF) Calcd. For C<sub>30</sub>H<sub>26</sub>N<sub>3</sub>O<sub>3</sub><sup>+</sup> ([M+H]<sup>+</sup>): 476.1968, found: 476.1960.

**HPLC chromatogram of compound 2n**

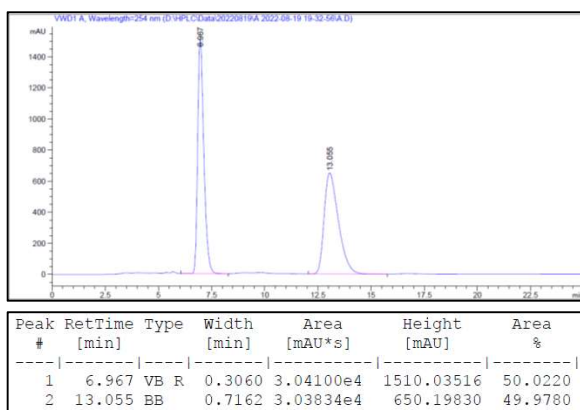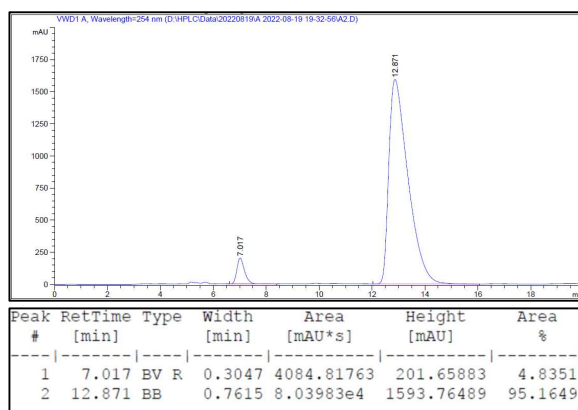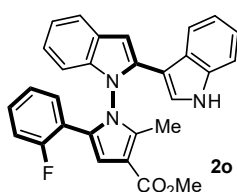

**methyl (*S*)-1-(1*H*,1'*H*-[2,3'-biindol]-1-yl)-5-(2-fluorophenyl)-2-methyl-1*H*-pyrrole-3-carboxylate (**2o**):**

Flash column chromatography eluent (petroleum ether/ ethyl acetate = 20/1); 87% yield (80.6 mg); white solid; m.p. = 137-139 °C;  $[\alpha]_D^{30} = -31.6$  (*c* 0.68, acetone); The product was analyzed by HPLC to determine the enantiomeric excess: 92:8 er (Chiralcel AD-H, *i*-propanol/hexane =95/5, flow rate 1.0 mL/min, T = 20 °C,  $\lambda = 254$  nm);  $t_R = 52.2$  min (minor),  $t_R = 44.8$  min (major).

**<sup>1</sup>H NMR** (400 MHz, CDCl<sub>3</sub>)  $\delta$  8.15 (s, 1H), 7.84 (d, *J* = 7.7, 1.1 Hz, 1H), 7.64 – 7.51 (m, 1H), 7.40 – 7.25 (m, 1H), 7.19 – 7.15 (m, 1H), 7.15 – 7.08 (m, 3H), 6.96 (d, *J* = 2.7 Hz, 1H), 6.95 – 6.88 (m, 3H), 6.81 – 6.72 (m, 1H), 6.66 – 6.58 (m, 1H), 6.57 – 6.51 (m, 1H), 6.25 (d, *J* = 2.8 Hz, 1H), 3.80 (s, 3H), 2.05 (s, 3H).

**<sup>13</sup>C NMR** (101 MHz, CDCl<sub>3</sub>)  $\delta$  165.3, 159.6 (d, *J* = 249.1 Hz), 138.7, 136.8, 135.9, 134.5, 129.2 (d, *J* = 8.4 Hz), 128.9, 126.4, 126.1, 125.7, 123.9 (d, *J* = 3.8 Hz), 123.0, 122.9, 121.6, 121.4, 120.8, 120.4, 120.0, 117.7 (d, *J* = 13.2 Hz), 115.6 (d, *J* = 22.7 Hz), 111.6, 111.4, 111.3, 108.5, 106.1, 100.1, 51.2, 10.2.

**<sup>19</sup>F NMR** (376 MHz, CDCl<sub>3</sub>)  $\delta$  -109.55 – -119.42 (m, 1F);

**HRMS** (ESI-TOF) Calcd. For C<sub>29</sub>H<sub>22</sub>N<sub>3</sub>O<sub>2</sub>FNa<sup>+</sup> ([M+Na]<sup>+</sup>): 486.1588, found: 486.1591.

**HPLC chromatogram of compound 2o**

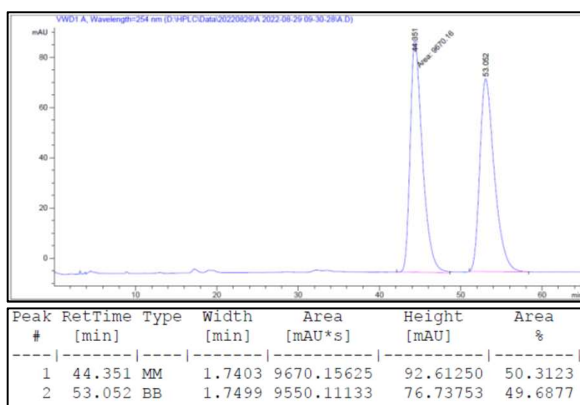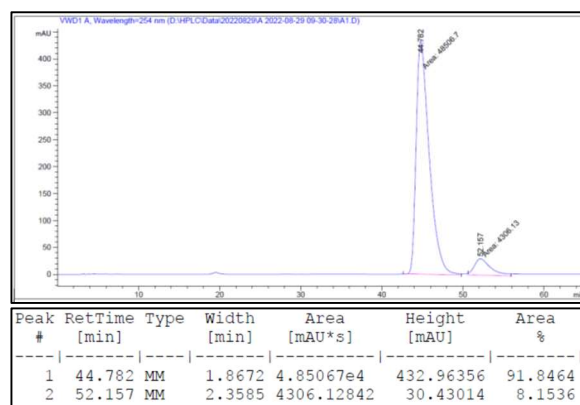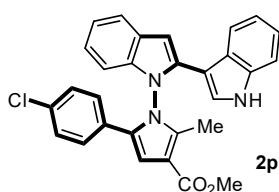

**methyl (*S*)-1-(1*H*,1'*H*-[2,3'-biindol]-1-yl)-5-(4-chlorophenyl)-2-methyl-1*H*-pyrrole-3-carboxylate (**2p**):**

Flash column chromatography eluent (petroleum ether/ ethyl acetate = 20/1); 95% yield (91.0 mg); white solid; m.p. = 100-102 °C;  $[\alpha]_D^{30} = -37.5$  (*c* 1.26, acetone); The product was analyzed by HPLC to determine the enantiomeric excess: 92:8 er (Chiralcel AD-H, *i*-propanol/hexane = 70/30, flow rate 1.0 mL/min, T = 20 °C,  $\lambda = 254$  nm);  $t_R = 5.4$  min (minor),  $t_R = 8.1$  min (major).

**<sup>1</sup>H NMR** (400 MHz, CDCl<sub>3</sub>)  $\delta$  8.20 (s, 1H), 8.03 – 7.94 (m, 1H), 7.71 – 7.63 (m, 1H), 7.43 – 7.32 (m, 1H), 7.30 – 7.26 (m, 1H), 7.25 – 7.22 (m, 1H), 7.21 – 7.16 (m, 2H), 7.08 (d, *J* = 0.8 Hz, 1H), 7.00 – 6.87 (m, 6H), 6.31 (d, *J* = 2.8 Hz, 1H), 3.86 (s, 3H), 2.08 (s, 3H).

**<sup>13</sup>C NMR** (101 MHz, CDCl<sub>3</sub>)  $\delta$  165.2, 139.1, 136.5, 135.9, 134.3, 133.3, 132.2, 128.8, 128.3, 127.4, 126.5, 125.7, 123.2, 123.1, 121.8, 121.2, 121.0, 120.6, 120.0, 111.7, 111.4, 108.4, 108.2, 106.1, 100.4, 51.3, 10.1.

**HRMS** (ESI-TOF) Calcd. For C<sub>29</sub>H<sub>22</sub>N<sub>3</sub>O<sub>2</sub>ClNa<sup>+</sup> ([M+Na]<sup>+</sup>): 486.1588, found: 486.1592.

**HPLC chromatogram of compound 2p**



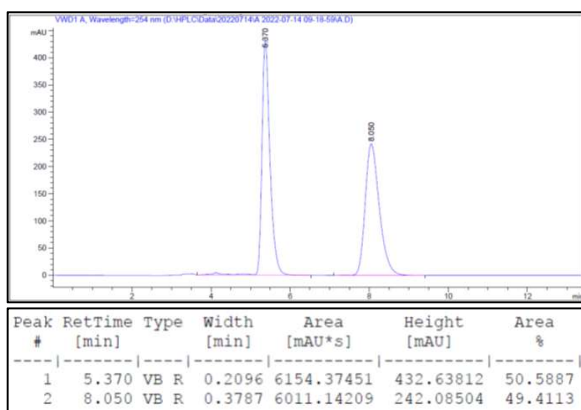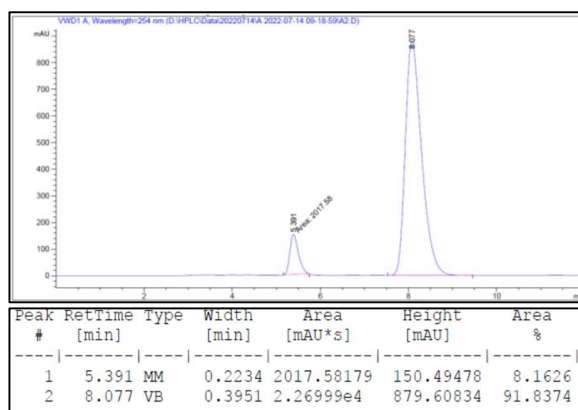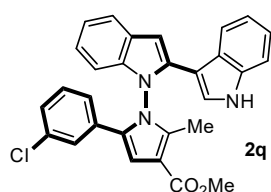

**methyl (*S*)-1-(1*H*,1'*H*-[2,3'-biindol]-1-yl)-5-(3-chlorophenyl)-2-methyl-1*H*-pyrrole-3-carboxylate (**2q**):**

Flash column chromatography eluent (petroleum ether/ ethyl acetate = 20/1); 93% yield (89.1 mg); white solid; m.p. = 100-102 °C;  $[\alpha]_D^{30} = -39.9$  (*c* 1.11, acetone); The product was analyzed by HPLC to determine the enantiomeric excess: 94:6 er (Chiralcel AD-H, *i*-propanol/hexane = 70/30, flow rate 1.0 mL/min, T = 20 °C,  $\lambda = 254$  nm);  $t_R = 5.0$  min (minor),  $t_R = 6.7$  min (major).

**<sup>1</sup>H NMR** (400 MHz, CDCl<sub>3</sub>)  $\delta$  8.19 (s, 1H), 8.05 – 7.94 (m, 1H), 7.73 – 7.64 (m, 1H), 7.41 – 7.34 (m, 1H), 7.29 – 7.26 (m, 1H), 7.24 – 7.14 (m, 3H), 7.10 – 7.07 (m, 2H), 7.03 – 6.97 (m, 2H), 6.94 – 6.85 (m, 2H), 6.80 – 6.75 (m, 1H), 6.32 (d, *J* = 2.8 Hz, 1H), 3.87 (s, 3H), 2.09 (s, 3H).

**<sup>13</sup>C NMR** (101 MHz, CDCl<sub>3</sub>)  $\delta$  165.2, 139.4, 136.5, 135.9, 134.33, 134.30, 132.0, 131.5, 129.8, 127.4, 126.54, 126.52, 125.7, 123.8, 123.2, 123.1, 121.8, 121.2, 121.0, 120.6, 120.0, 111.8, 111.4, 108.7, 108.4, 106.1, 100.5, 51.3, 10.1.

**HRMS** (ESI-TOF) Calcd. For C<sub>29</sub>H<sub>23</sub>N<sub>3</sub>O<sub>2</sub>Cl<sup>+</sup> ([M+H]<sup>+</sup>): 481.1551, found: 481.1547.

**HPLC chromatogram of compound 2q**

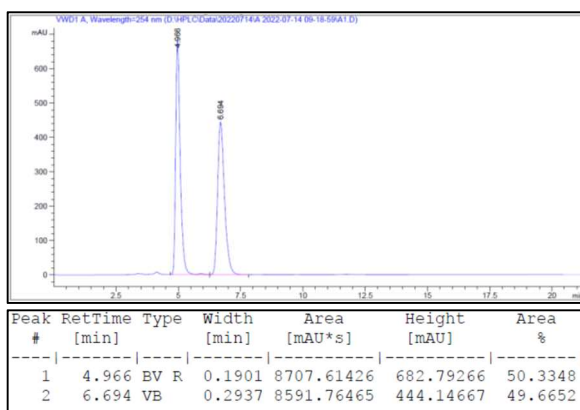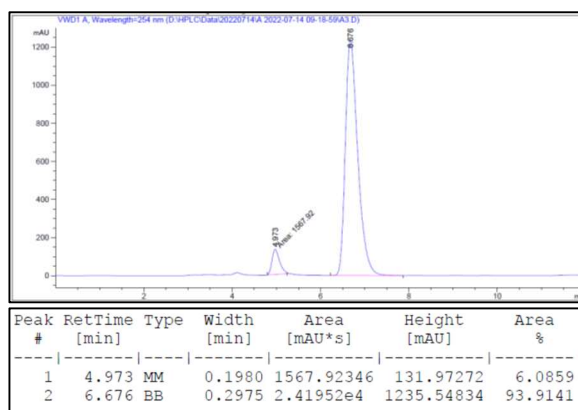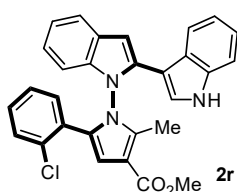

**methyl (S)-1-(1H,1'H-[2,3'-biindol]-1-yl)-5-(2-chlorophenyl)-2-methyl-1H-pyrrole-3-carboxylate (2r):**

Flash column chromatography eluent (petroleum ether/ ethyl acetate = 20/1); 95% yield (91.0 mg); white solid; m.p. = 115-117 °C;  $[\alpha]_D^{30} = -14.7$  (*c* 0.79, acetone); The product was analyzed by HPLC to determine the enantiomeric excess: 92:8 er (Chiralcel AD-H, *i*-propanol/hexane = 70/30, flow rate 1.0 mL/min, T = 20 °C,  $\lambda = 254$  nm);  $t_R = 6.3$  min (minor),  $t_R = 5.2$  min (major).

**<sup>1</sup>H NMR** (400 MHz, CDCl<sub>3</sub>)  $\delta$  8.24 (s, 1H), 7.93 – 7.80 (m, 1H), 7.67 – 7.55 (m, 1H), 7.47 – 7.35 (m, 1H), 7.31 – 7.27 (m, 1H), 7.24 – 7.15 (m, 3H), 7.13 – 7.09 (m, 1H), 7.08 – 7.04 (m, 1H), 6.98 – 6.90 (m, 3H), 6.73 – 6.64 (m, 2H), 6.36 (d, *J* = 2.8 Hz, 1H), 3.89 (s, 3H), 2.22 (s, 3H).

**<sup>13</sup>C NMR** (101 MHz, CDCl<sub>3</sub>)  $\delta$  165.4, 137.8, 137.0, 135.9, 134.5, 133.9, 130.7, 129.7, 129.3, 129.1, 128.2, 126.4, 126.1, 125.8, 122.94, 122.89, 121.53, 121.48, 120.8, 120.4, 120.0, 111.6, 111.3, 111.2, 108.6, 106.3, 100.1, 51.2, 10.5.

**HRMS** (ESI-TOF) Calcd. For C<sub>29</sub>H<sub>22</sub>N<sub>3</sub>O<sub>2</sub>ClNa<sup>+</sup> ([M+Na]<sup>+</sup>): 502.1292, found: 502.1299.

**HPLC chromatogram of compound 2r**

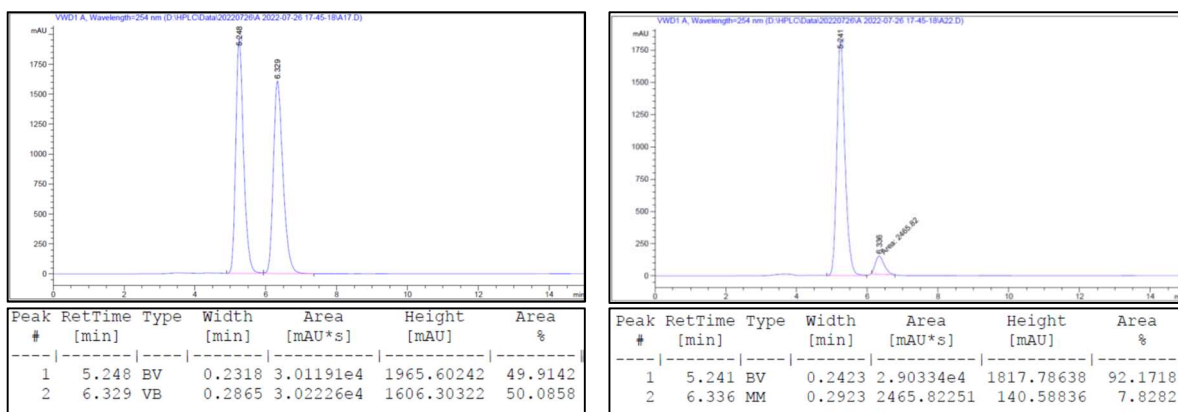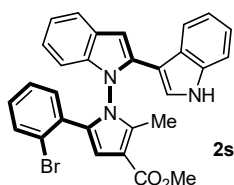

**methyl (S)-1-(1H,1'H-[2,3'-biindol]-1-yl)-5-(2-bromophenyl)-2-methyl-1H-pyrrole-3-carboxylate (2s):**

Flash column chromatography eluent (petroleum ether/ ethyl acetate = 20/1); 90% yield (94.1 mg); white solid; m.p. = 120-122 °C;  $[\alpha]_D^{30} = +12.07$  (*c* 1.06, acetone); The product was analyzed by HPLC to determine the enantiomeric excess: 93:7 er (Chiralcel AD-H, *i*-propanol/hexane =70/30, flow rate 1.0 mL/min, T = 20 °C,  $\lambda = 254$  nm);  $t_R = 6.7$  min (minor),  $t_R = 5.8$  min (major).

**<sup>1</sup>H NMR** (400 MHz, CDCl<sub>3</sub>)  $\delta$  8.20 (s, 1H), 7.83 – 7.75 (m, 1H), 7.56 – 7.49 (m, 1H), 7.37 – 7.31 (m, 1H), 7.27 – 7.19 (m, 2H), 7.17 – 7.07 (m, 3H), 7.05 – 6.99 (m, 1H), 6.89 (s, 1H), 6.85 (s, 1H), 6.82 – 6.75 (m, 1H), 6.66 – 6.60 (m, 2H), 6.29 (d, *J* = 2.8 Hz, 1H), 3.82 (s, 3H), 2.15 (s, 3H).

**<sup>13</sup>C NMR** (101 MHz, CDCl<sub>3</sub>)  $\delta$  165.5, 137.6, 136.9, 135.9, 134.5, 133.0, 131.0, 130.9, 130.1, 129.4, 126.7, 126.3, 125.7, 124.5, 122.95, 122.9, 121.52, 121.49, 120.8, 120.3, 120.0, 111.6, 111.4, 111.0, 108.7, 106.3, 100.0, 51.3, 10.5.

**HRMS** (ESI-TOF) Calcd. For C<sub>29</sub>H<sub>22</sub>N<sub>3</sub>O<sub>2</sub>BrNa<sup>+</sup> ([M+Na]<sup>+</sup>): 546.0787, found: 546.0785.

**HPLC chromatogram of compound 2s**

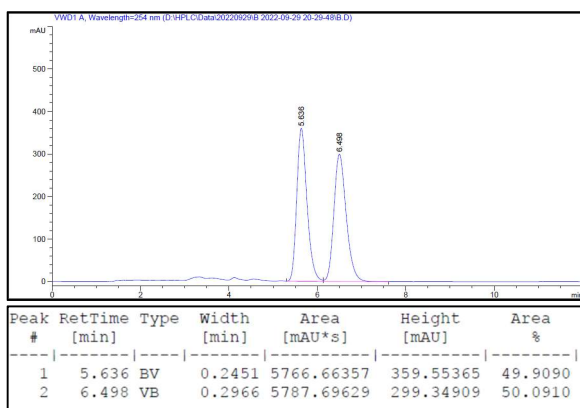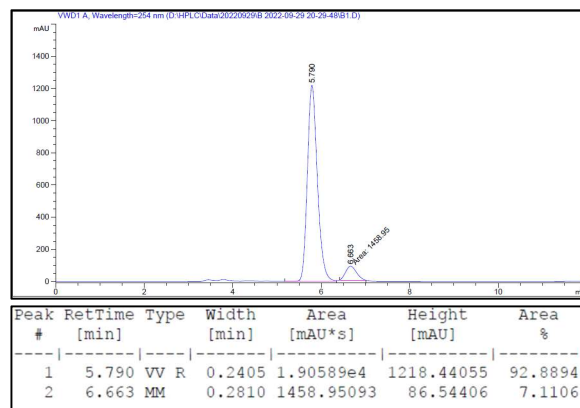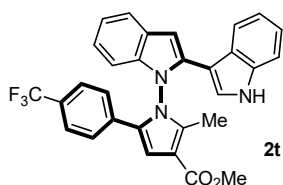

**Methyl (S)-1-(1H,1'H-[2,3'-biindol]-1-yl)-2-methyl-5-(4-(trifluoromethyl)phenyl)-1H-pyrrole-3-carboxylate (2t):**

Flash column chromatography eluent (petroleum ether/ ethyl acetate = 20/1); 90% yield (92.3 mg); white solid; m.p. = 99-101 °C;  $[\alpha]_D^{30} = -42.0$  (*c* 1.49, acetone); The product was analyzed by HPLC to determine the enantiomeric excess: 87:13 er (Chiralcel OD-H, *i*-propanol/hexane =95/5, flow rate 1.0 mL/min, T = 20 °C,  $\lambda = 254$  nm);  $t_R = 14.8$  min (minor),  $t_R = 20.7$  min (major).

$^1\text{H}$  NMR (400 MHz,  $\text{CDCl}_3$ )  $\delta$  8.17 (s, 1H), 7.94 (d,  $J = 7.6$  Hz, 1H), 7.71 (d,  $J = 7.6$  Hz, 1H), 7.38 (d,  $J = 7.7$  Hz, 1H), 7.27 – 7.17 (m, 6H), 7.14 – 7.02 (m, 4H), 6.94 (d,  $J = 7.8$  Hz, 1H), 6.33 (d,  $J = 2.7$  Hz, 1H), 3.88 (s, 3H), 2.12 (s, 3H).

$^{13}\text{C}$  NMR (101 MHz,  $\text{CDCl}_3$ )  $\delta$  165.1, 139.8, 136.5, 135.9, 134.3, 133.2, 131.9, 126.6, 126.0, 125.7, 125.6 (q,  $J = 4.0$  Hz), 123.4, 123.1, 122.0, 121.2, 121.1, 120.7, 119.9, 112.0, 111.4, 109.3, 108.4, 106.1, 100.6, 51.3, 10.2.

$^{19}\text{F}$  NMR (377 MHz,  $\text{CDCl}_3$ )  $\delta$  -62.8.

HRMS (ESI-TOF) Calcd. For  $\text{C}_{30}\text{H}_{21}\text{F}_3\text{N}_3\text{O}_2^+$  ( $[\text{M}+\text{H}]^+$ ): 514.1742, found: 514.1750.

**HPLC chromatogram of compound 2t**

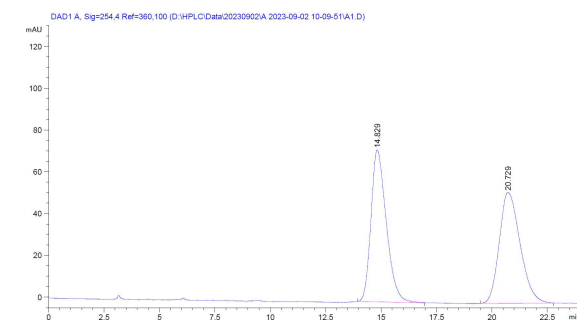

| Peak # | RetTime [min] | Type | Width [min] | Area [mAU*s] | Height [mAU] | Area %  |
|--------|---------------|------|-------------|--------------|--------------|---------|
| 1      | 14.829        | BB   | 0.6374      | 3477.49805   | 72.65866     | 50.1104 |
| 2      | 20.729        | BB   | 0.7787      | 3462.17969   | 52.96048     | 49.8896 |

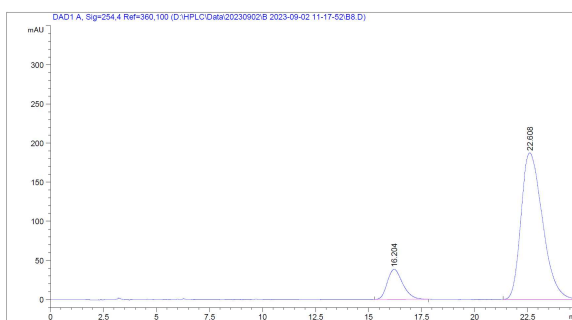

| Peak # | RetTime [min] | Type | Width [min] | Area [mAU*s] | Height [mAU] | Area %  |
|--------|---------------|------|-------------|--------------|--------------|---------|
| 1      | 16.204        | BB   | 0.6021      | 1953.58081   | 38.55811     | 12.8801 |
| 2      | 22.608        | BB   | 0.8460      | 1.32139e4    | 187.31456    | 87.1199 |

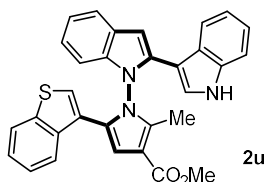

**methyl (S)-1-(1H,1'H-[2,3'-biindol]-1-yl)-5-(benzo[b]thiophen-3-yl)-2-methyl-1H-pyrrole-3-carboxylate (2u):**

Flash column chromatography eluent (petroleum ether/ ethyl acetate = 20/1); 90% yield (90.2 mg); white solid; m.p. = 109-111 °C;  $[\alpha]_D^{30} = -43.7$  (*c* 1.20, acetone); The product was analyzed by HPLC to determine the enantiomeric excess: 90:10 er (Chiralcel AD-H, *i*-propanol/hexane = 95/5, flow rate 1.0 mL/min, T = 20 °C,  $\lambda = 254$  nm);  $t_R = 21.5$  min (minor),  $t_R = 25.3$  min (major).

**<sup>1</sup>H NMR** (400 MHz, CDCl<sub>3</sub>)  $\delta$  8.07 (s, 1H), 8.04 – 7.95 (m, 1H), 7.72 – 7.62 (m, 1H), 7.54 – 7.47 (m, 1H), 7.36 – 7.31 (m, 1H), 7.30 – 7.25 (m, 1H), 7.21 – 7.18 (m, 1H), 7.17 – 7.14 (m, 2H), 7.12 – 7.04 (m, 5H), 6.91 – 6.85 (m, 1H), 6.58 (s, 1H), 6.38 (d, *J* = 2.8 Hz, 1H), 3.78 (s, 3H), 1.93 (s, 3H).

**<sup>13</sup>C NMR** (101 MHz, CDCl<sub>3</sub>)  $\delta$  164.9, 140.0, 139.7, 138.5, 136.5, 135.9, 134.4, 131.2, 127.7, 126.8, 125.8, 124.3, 123.5, 123.3, 123.0, 122.0, 121.7, 121.6, 121.0, 120.6, 119.9, 119.0, 112.0, 111.4, 108.8, 108.6, 105.9, 100.7, 51.3, 10.0.

**HRMS** (ESI-TOF) Calcd. For C<sub>31</sub>H<sub>23</sub>N<sub>3</sub>O<sub>2</sub>SNa<sup>+</sup> ([M+Na]<sup>+</sup>): 524.1403, found: 524.1410.

**HPLC chromatogram of compound 2u**

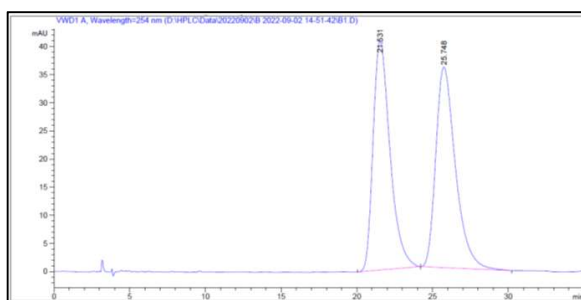

| Peak # | RetTime [min] | Type | Width [min] | Area [mAU*s] | Height [mAU] | Area %  |
|--------|---------------|------|-------------|--------------|--------------|---------|
| 1      | 21.531        | BB   | 1.1832      | 3168.24536   | 40.78875     | 49.5728 |
| 2      | 25.748        | BB   | 1.3517      | 3222.85010   | 35.68263     | 50.4272 |

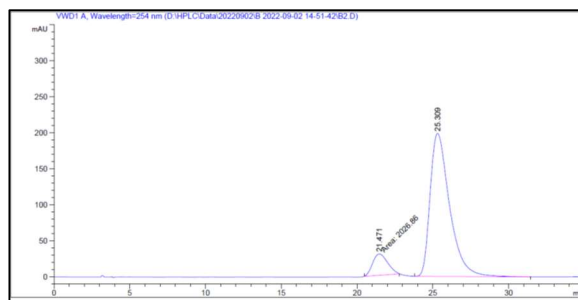

| Peak # | RetTime [min] | Type | Width [min] | Area [mAU*s] | Height [mAU] | Area %  |
|--------|---------------|------|-------------|--------------|--------------|---------|
| 1      | 21.471        | MM   | 1.1410      | 2026.85974   | 29.60553     | 10.2621 |
| 2      | 25.309        | BB   | 1.3558      | 1.77241e4    | 198.47865    | 89.7379 |

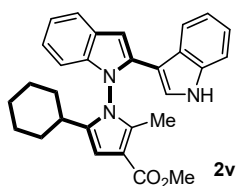

**methyl (S)-1-(1H,1'H-[2,3'-biindol]-1-yl)-5-cyclohexyl-2-methyl-1H-pyrrole-3-carboxylate (2v):**

Flash column chromatography eluent (petroleum ether/ ethyl acetate = 20/1); 97% yield (87.5 mg); white solid; m.p. = 103-105 °C;  $[\alpha]_D^{30} = +8.12$  (*c* 1.49, acetone); The product was analyzed by HPLC to determine the enantiomeric excess: 95:5 er (Chiralcel AD-H, *i*-propanol/hexane = 90/10, flow rate 1.0 mL/min, T = 20 °C,  $\lambda = 254$  nm);  $t_R = 6.3$  min (minor),  $t_R = 6.9$  min (major).

**$^1\text{H}$  NMR** (400 MHz,  $\text{CDCl}_3$ )  $\delta$  8.11 (s, 1H), 8.08 – 8.02 (m, 1H), 7.75 – 7.58 (m, 1H), 7.40 – 7.27 (m, 1H), 7.24 – 7.20 (m, 2H), 7.17 – 7.10 (m, 2H), 7.07 (s, 1H), 6.89 – 6.81 (m, 1H), 6.41 (s, 1H), 5.94 (d,  $J = 2.8$  Hz, 1H), 3.78 (s, 3H), 1.95 (s, 3H), 1.93 – 1.84 (m, 2H), 1.70 – 1.48 (m, 3H), 1.16 – 0.93 (m, 3H), 0.90 – 0.72 (m, 3H).

**$^{13}\text{C}$  NMR** (101 MHz,  $\text{CDCl}_3$ )  $\delta$  165.7, 139.9, 136.8, 136.1, 135.8, 134.6, 126.5, 125.7, 122.9, 122.8, 121.5, 121.4, 120.9, 120.4, 120.2, 111.4, 110.7, 108.4, 106.1, 104.2, 99.7, 51.1, 34.3, 34.0, 33.0, 26.1, 25.7, 10.0.

**HRMS** (ESI-TOF) Calcd. For  $\text{C}_{29}\text{H}_{30}\text{N}_2\text{O}_2^+$  ( $[\text{M}+\text{H}]^+$ ): 452.2332, found: 452.2330.

**HPLC chromatogram of compound 2v**

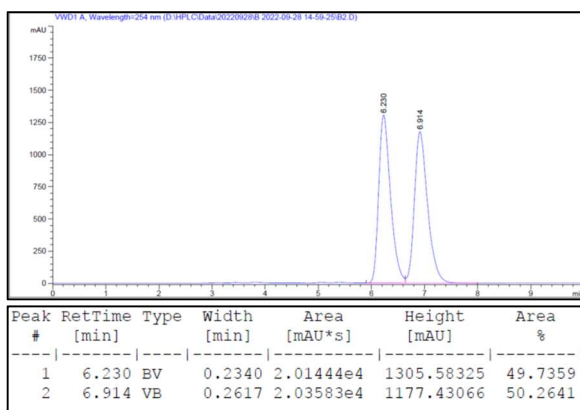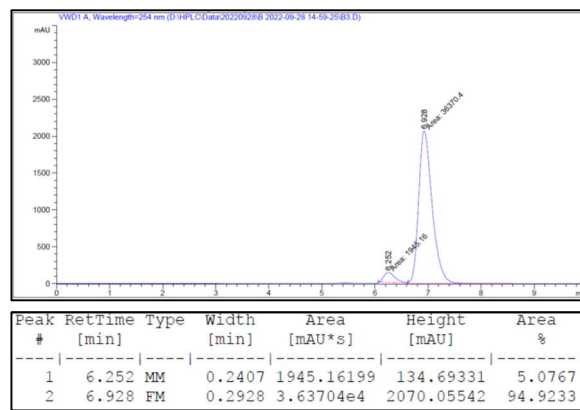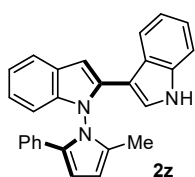

**(S)-1-(2-methyl-5-phenyl-1H-pyrrol-1-yl)-1H,1'H-2,3'-biindole (2z):**

Flash column chromatography eluent (petroleum ether/ ethyl acetate = 20/1); 79% yield (61.1 mg); white solid; m.p. = 95-97 °C;  $[\alpha]_D^{30} = -62.0$  (*c* 1.49, acetone); The product was analyzed by HPLC to determine the enantiomeric excess: 86:14 er (Chiralcel OD-H, *i*-propanol/hexane = 95/5, flow rate 1.0 mL/min, T = 20 °C,  $\lambda = 254$  nm);  $t_R = 13.4$  min (minor),  $t_R = 15.8$  min (major).

$^1\text{H}$  NMR (400 MHz,  $\text{CDCl}_3$ )  $\delta$  8.08 – 7.95 (m, 1H), 7.73 – 7.50 (m, 1H), 7.41 – 7.23 (m, 1H), 7.19 (d, *J* = 6.2 Hz, 4H), 7.14 – 6.86 (m, 8H), 6.47 (d, *J* = 4.0 Hz, 1H), 6.23 (d, *J* = 2.8 Hz, 1H), 6.11 – 5.98 (m, 1H), 1.77 – 1.63 (m, 3H).

$^{13}\text{C}$  NMR (101 MHz,  $\text{CDCl}_3$ )  $\delta$  137.0, 135.9, 134.9, 132.7, 131.9, 131.1, 128.5, 126.5, 126.4, 125.8, 125.7, 122.73, 122.66, 122.0, 121.2, 120.8, 120.2, 111.3, 108.8, 106.9, 106.5, 106.3, 99.4, 10.7.

HRMS (ESI-TOF) Calcd. For  $\text{C}_{27}\text{H}_{21}\text{N}_3^+$  ( $[\text{M}+\text{H}]^+$ ): 388.1808, found: 388.1806.

**HPLC chromatogram of compound 2z**

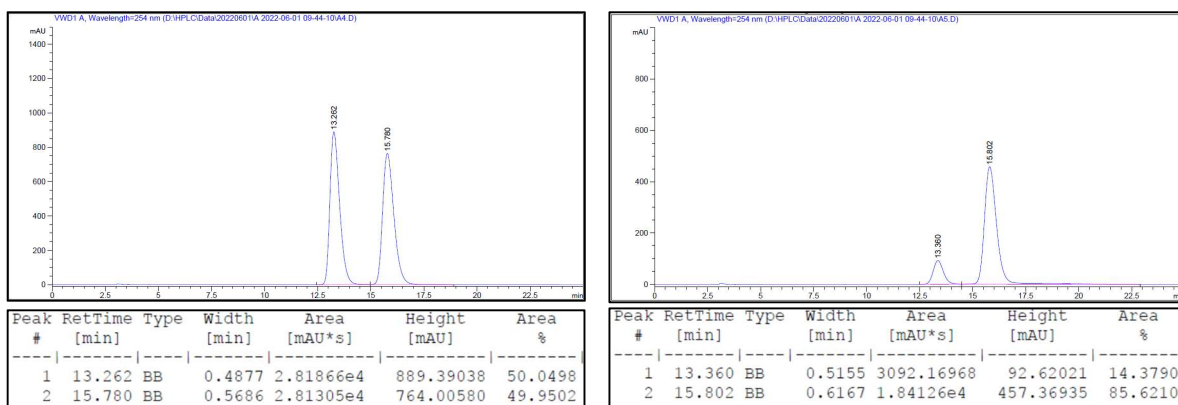

#### 4. Procedure for one-mmol-scale reaction and synthesis of compound 3

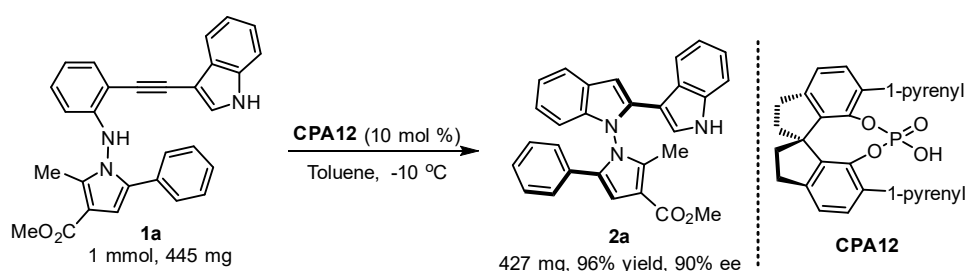

*o*-alkynylanilines **1** (445 mg, 1mmol), chiral phosphoric acid (*S*)-**CPA 12** (72 mg, 0.1 mmol) were added to a dried tube. Then, toluene (10 mL) was added to the reaction mixture, which was stirred at  $-10\text{ }^{\circ}\text{C}$  for 12 h. After the completion of the reaction which was indicated by TLC, the reaction mixture was further purified through preparative thin-layer chromatography on silica gel (petroleum ether/EtOAc = 8:1) to afford pure product **2a** in 96% yield (427 mg), 95:5 er.

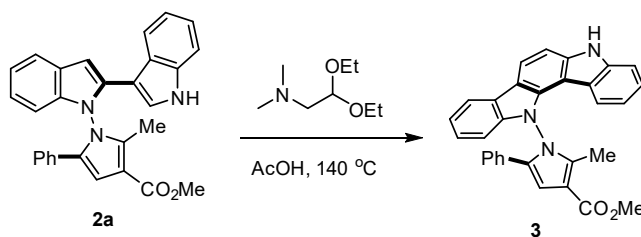

Following a reported procedure,<sup>[5]</sup> in a flame dried vial under nitrogen atmosphere, *N,N*-pyrrolylindole **2a** (89.0 mg, 0.2 mmol, 1.00 equiv.) was dissolved in AcOH (2mL, 0.1 M); commercially available 2,2-diethoxy-*N,N*-dimethylethanamine (40.0  $\mu\text{L}$ , 0.2 mmol, 1.00 equiv.) **3** was added under vigorous stirring. The reaction mixture was heated up to reflux ( $140\text{ }^{\circ}\text{C}$ ) and monitored via TLC (3:1 hexane/EtOAc). Upon complete consumption of the



starting material (12 hour), the reaction was cooled to room temperature and the solvent removed under reduced pressure. The crude product was purified via flash chromatography to afford pure product **3** in 80% yield (84.4 mg), 95:5 er.

**methyl (*S*)-1-(indolo[3,2-*a*]carbazol-12(*5H*)-yl)-2-methyl-5-phenyl-1*H*-pyrrole-3-carboxylate (**3**):**

Flash column chromatography eluent (gradient 8:1-3:1 hexane:EtOAc); 80% yield (84.4 mg); white solid; m.p. = 113-115 °C;  $[\alpha]_D^{30} = -12.8$  (*c* 0.75, acetone); The product was analyzed by HPLC to determine the enantiomeric excess: 95:5 er (Chiralcel OD-H, *i*-propanol/hexane = 90/10, flow rate 1.0 mL/min, T = 20 °C,  $\lambda = 254$  nm);  $t_R = 23.8$  min (minor),  $t_R = 33.5$  min (major).

**<sup>1</sup>H NMR** (400 MHz, CDCl<sub>3</sub>)  $\delta$  8.47 (s, 1H), 8.14 (d, *J* = 8.4 Hz, 1H), 8.07 – 7.99 (m, 1H), 7.51 – 7.42 (m, 2H), 7.37 – 7.25 (m, 5H), 7.13 (s, 1H), 7.04 – 6.90 (m, 4H), 6.87 – 6.79 (m, 1H), 6.49 – 6.34 (m, 1H), 3.90 (s, 3H), 2.00 (s, 3H);

**<sup>13</sup>C NMR** (101 MHz, CDCl<sub>3</sub>)  $\delta$  165.4, 140.4, 140.1, 139.3, 138.8, 135.6, 135.5, 130.2, 128.4, 127.4, 127.1, 125.10, 125.05, 122.6, 122.3, 121.6, 120.9, 120.8, 119.1, 118.7, 114.3, 111.7, 110.3, 108.6, 108.4, 107.2, 105.4, 51.3, 10.2;

**HRMS** (ESI-TOF) Calcd. For C<sub>31</sub>H<sub>24</sub>N<sub>3</sub>O<sub>2</sub><sup>+</sup> ([M+H]<sup>+</sup>): 470.1863, found: 470.1858.

**HPLC chromatogram of compound 3**

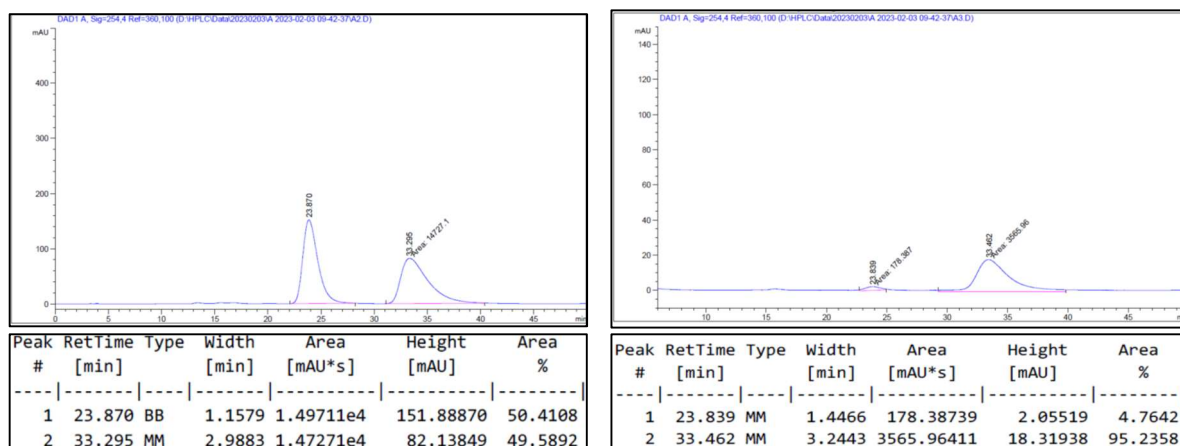

**5. Non-linear effect study**

The reactions were carried out following general procedure with **1a** (0.2 mmol), using CPA-

**12** of varying ee under standard conditions until complete consumption of starting material (detected by TLC). After filtration and evaporation, the residue was purified by a flash column chromatography, and analyzed by chiral HPLC.

| CPA12 (ee %) | 2a (ee %) <sup>a</sup> | CPA12 (ee %) | 2a (ee %) <sup>a</sup> |
|--------------|------------------------|--------------|------------------------|
| 21.74        | 25.44                  | 81.06        | 79.22                  |
| 41.08        | 42.80                  | 99.00        | 90.00                  |
| 62.34        | 65.08                  |              |                        |

<sup>a</sup>The ee was determined by HPLC (Chiralcel OD-H, *i*-propanol/hexane = 95/5, flow rate 1.0 mL/min, T = 20 °C, λ = 254 nm); t<sub>R</sub> = 23.457 min (minor), t<sub>R</sub> = 27.639 min (major).

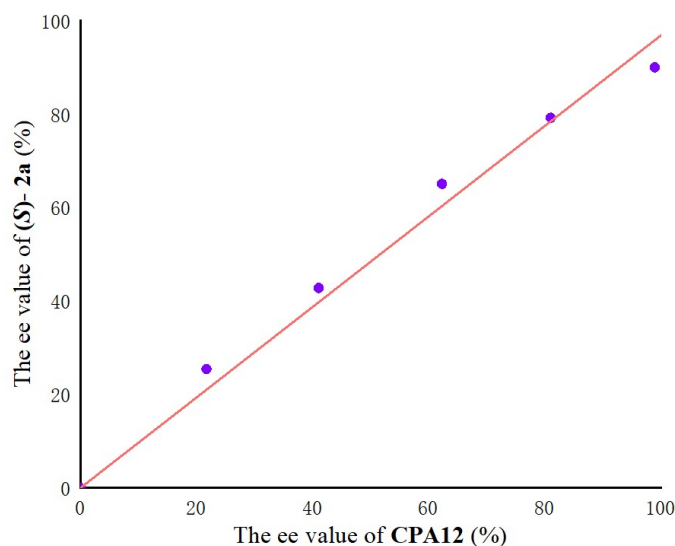

**Figure S1.** The study on the relationship between ee value of the phosphoric acid (*S*)-CPA12 and that of the product (*S*)-2a

## 6. Absolute configuration determination

To a 4 mL oven-dried glass sample bottle was added 30 mg pure **2b** with 3 mL ethyl ether to get clear solution. The mixture solution was sealed with filter paper to slowly grow crystals at room temperature. Crystal data for (*S*)-**2b**: C<sub>30</sub>H<sub>25</sub>N<sub>3</sub>O<sub>2</sub>, M<sub>r</sub> = 459.53, T = 293 K, orthorhombic, space group P 21 21 21, a = 7.3836(2), b = 17.6933(6), c = 18.4913(6) Å, V = 2415.71(13) Å<sup>3</sup>, Z = 4, 9959 unique reflections, final R<sub>1</sub> = 0.0317 for 3854 and wR<sub>2</sub> = 0.0924 for 4262 observed [*I* > 2σ(*I*)] reflections, Flack  $\chi$  = -0.04(10). CCDC 2279386 contains the supplementary crystallographic data for this paper. These data can be obtained free of charge

via [www.ccdc.cam.ac.uk/conts/retrieving.html](http://www.ccdc.cam.ac.uk/conts/retrieving.html) (or from the Cambridge Crystallographic Data Centre, 12, Union Road, Cambridge CB21EZ, UK; fax: (+44) 1223-336-033; or [deposit@ccdc.cam.ac.uk](mailto:deposit@ccdc.cam.ac.uk)).

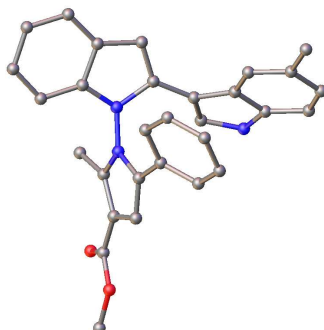

**Figure S2.** ORTEP representation of (*S*)-**2b** (CCDC 2279386).

## 7. Reference

- [1] N. Kim, J. T. Han, D. H. Ryu, J. Yun, *Org. Lett.* **2017**, *19*, 6144-6147.
- [2] Y. Gao, L.-Y. Wang, T. Zhang, B.-M. Yang, Y. Zhao, *Angew. Chem. Int. Ed.* **2022**, *61*, e202200371.
- [3] M. Hatano, K. Mikami, *J. Am. Chem. Soc.* **2003**, *125*, 4704-4705
- [4] J. S. Oakdale, D. L. Boger, *Org. Lett.* **2010**, *12*, 1132-1134.
- [5] J. Bergman, E. Desarbre, E. Koch, *Tetrahedron* **1999**, *55*, 2363-2370.

## 8. NMR spectra

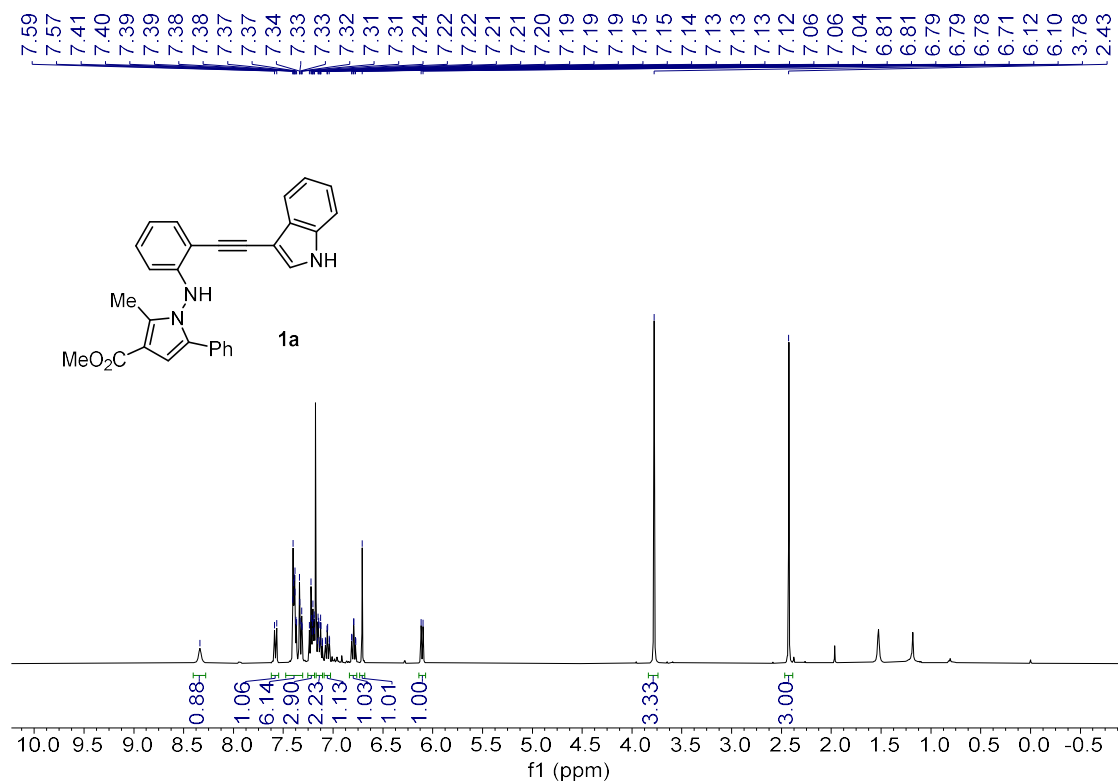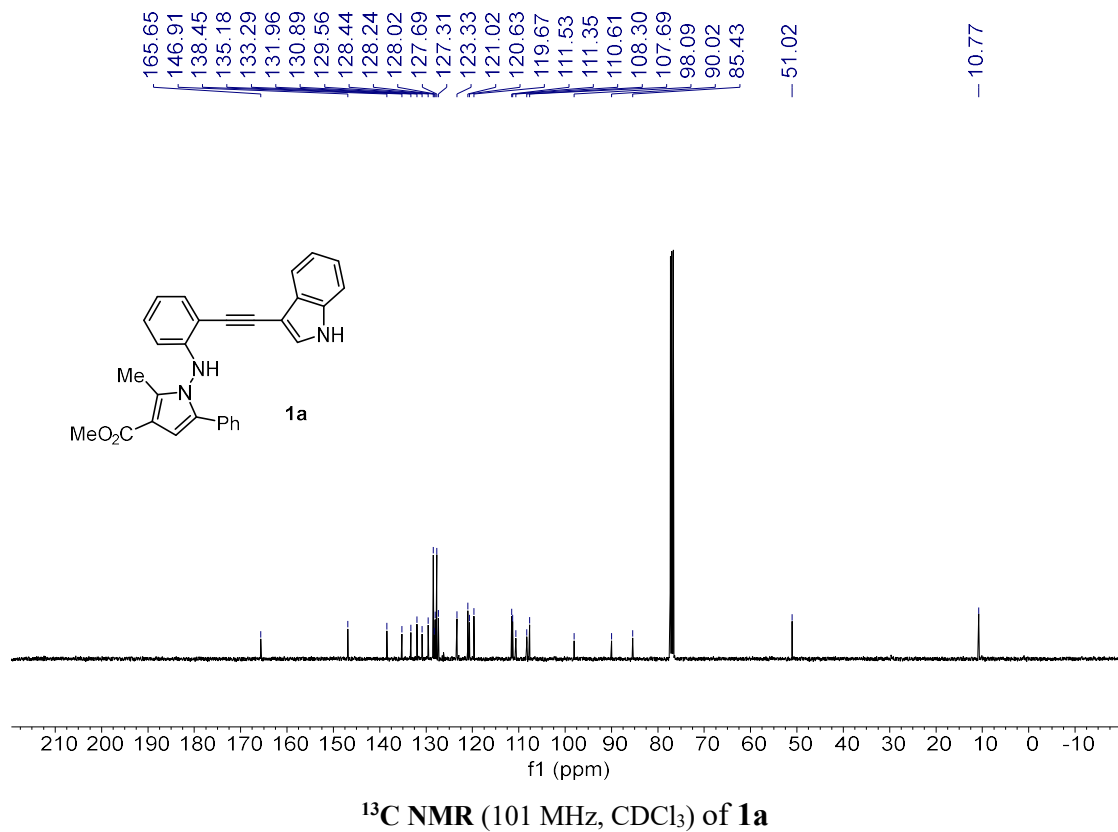

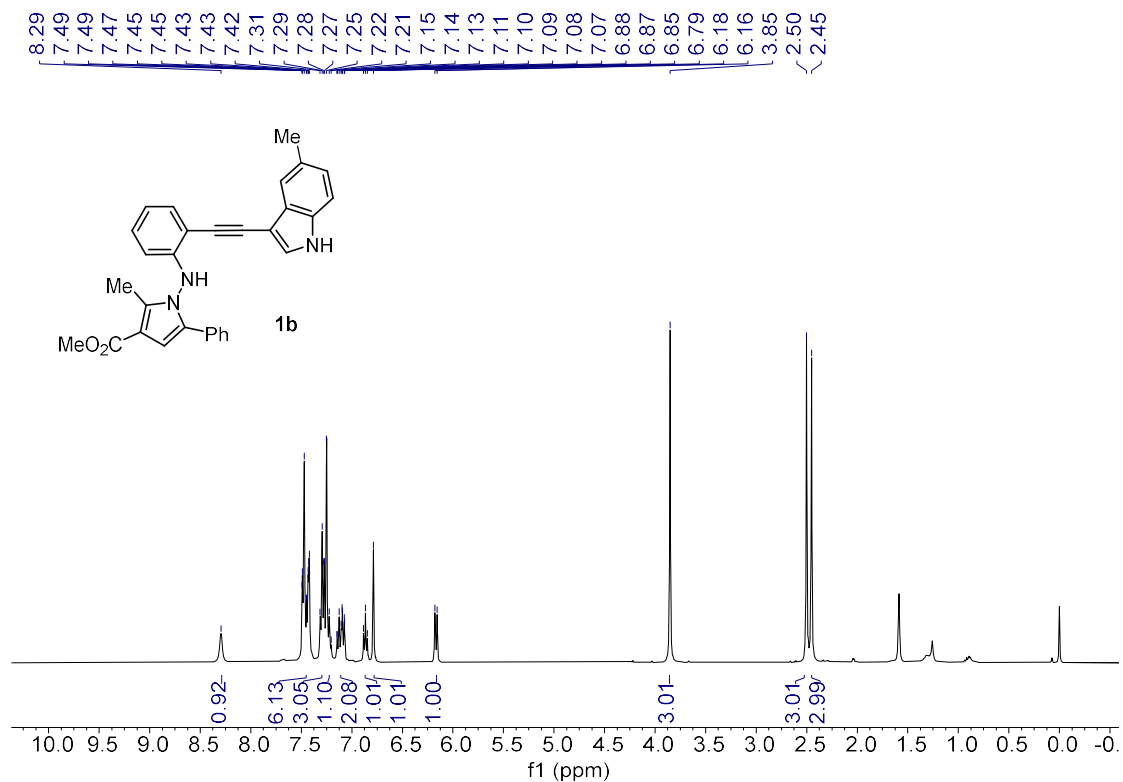

<sup>1</sup>H NMR (400 MHz, CDCl<sub>3</sub>) of **1b**

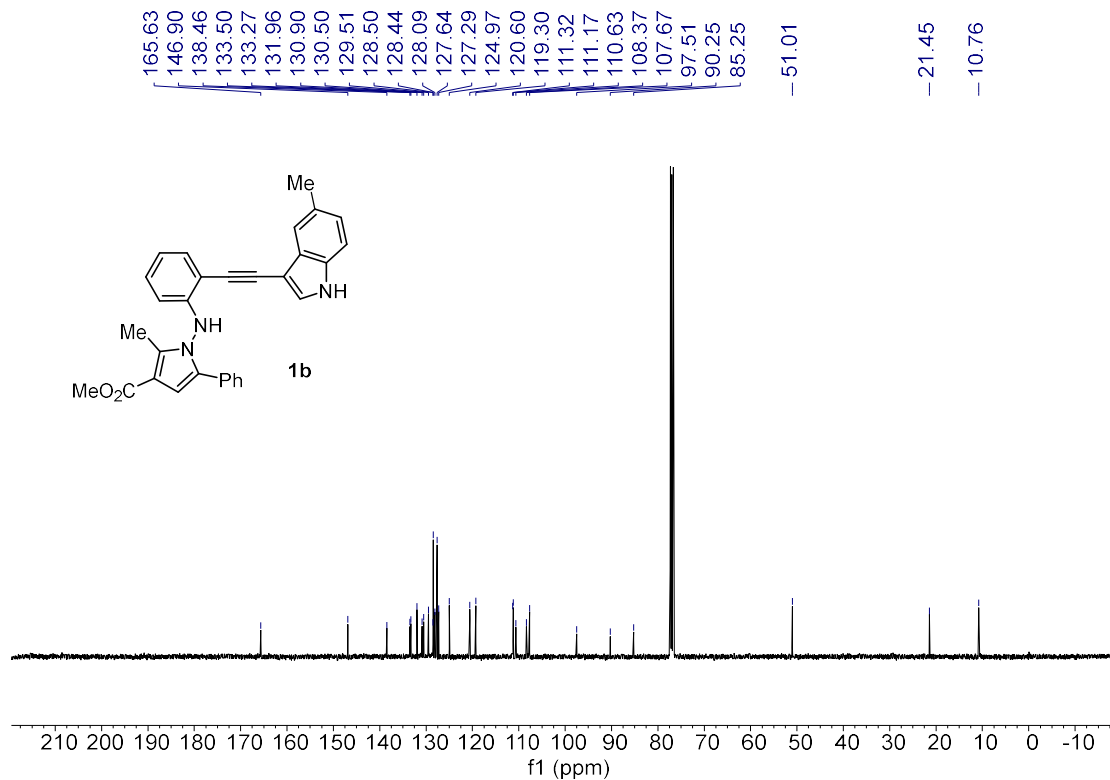

<sup>13</sup>C NMR (101 MHz, CDCl<sub>3</sub>) of **1b**

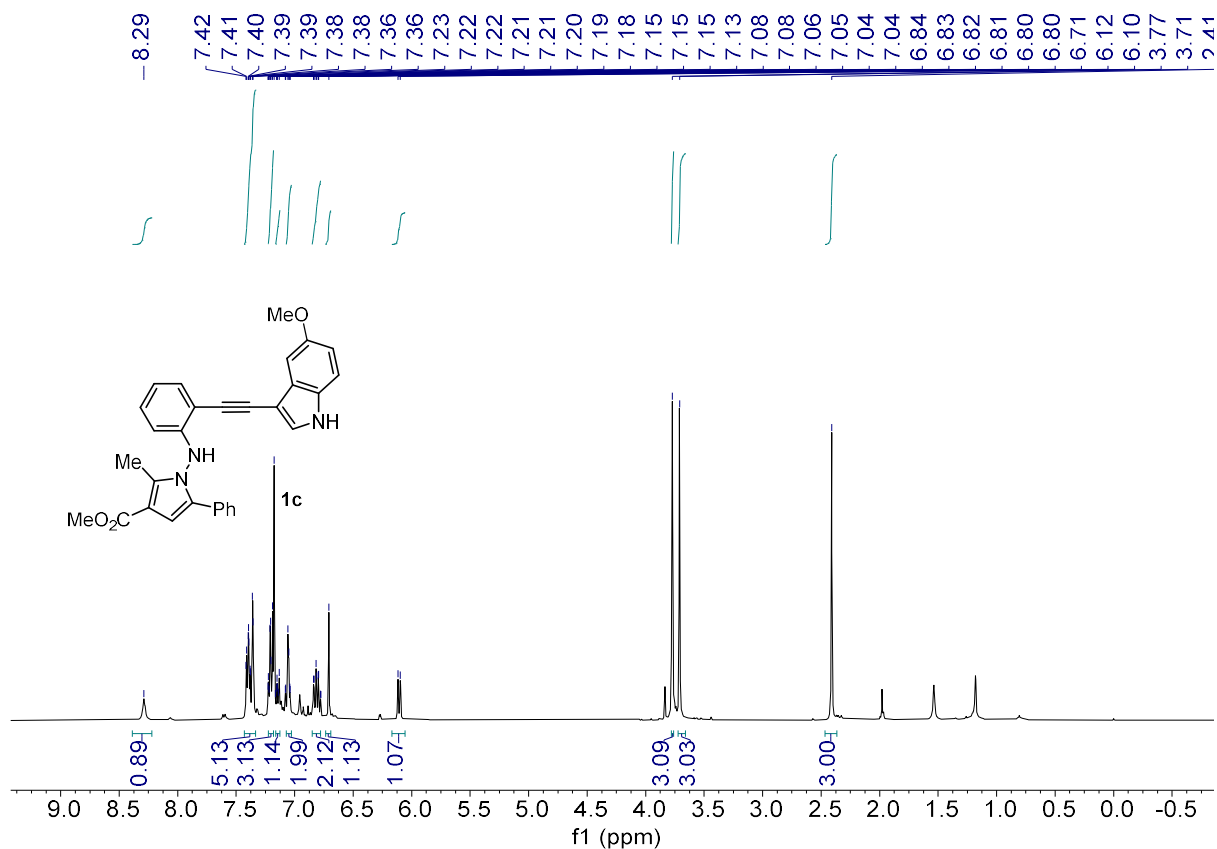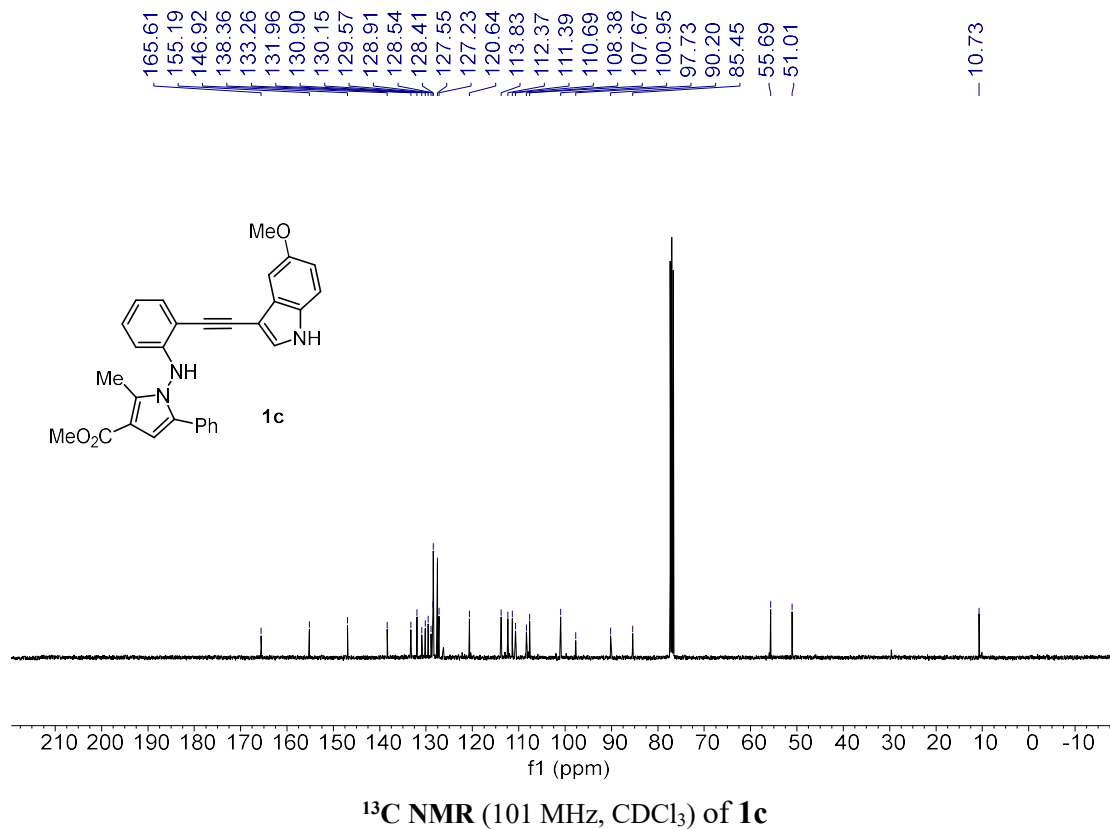

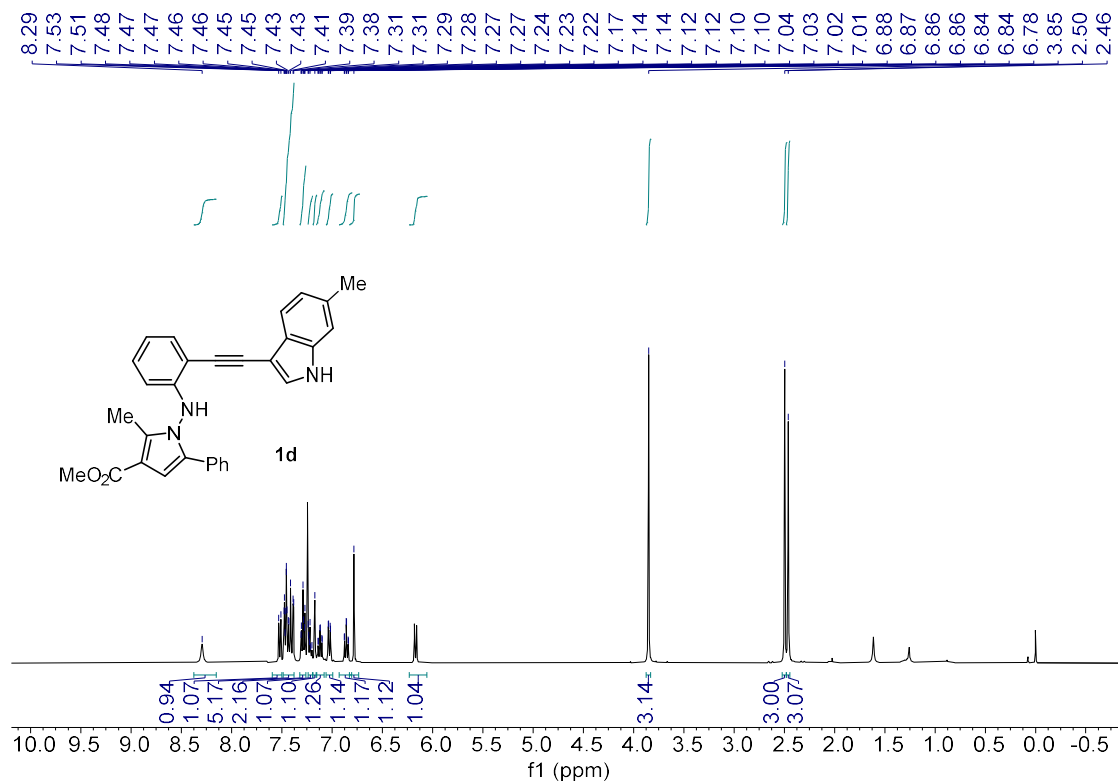

<sup>1</sup>H NMR (400 MHz, CDCl<sub>3</sub>) of **1d**

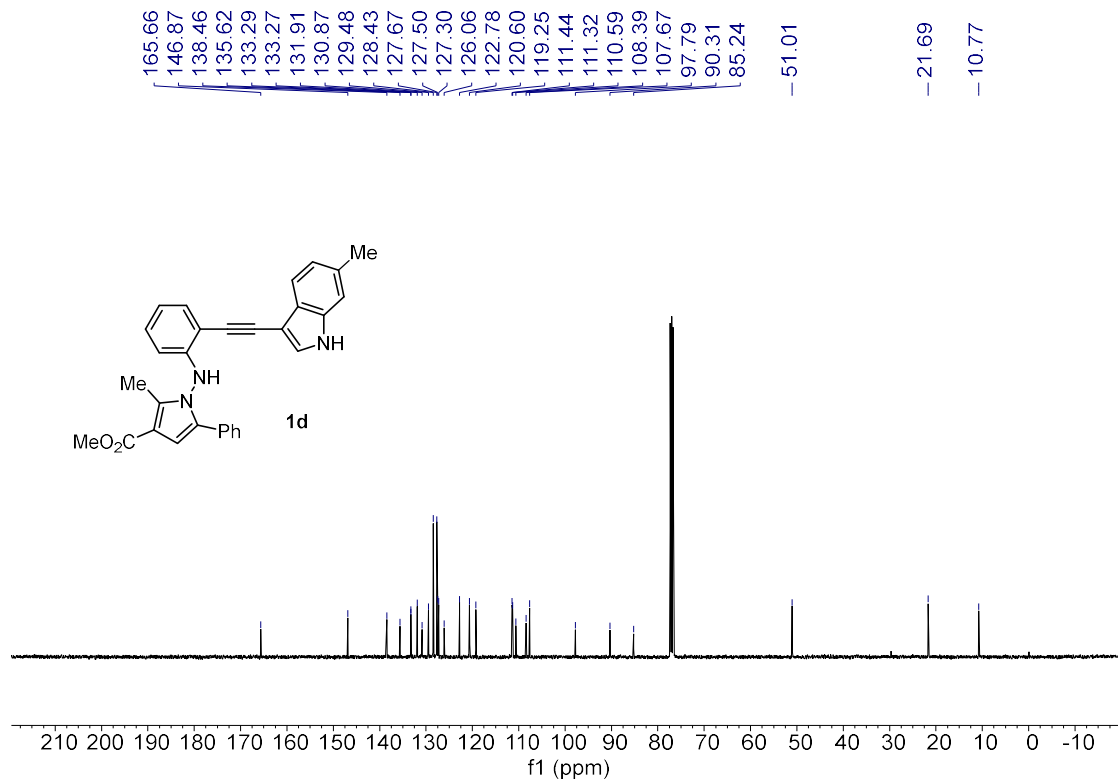

<sup>13</sup>C NMR (101 MHz, CDCl<sub>3</sub>) of **1d**

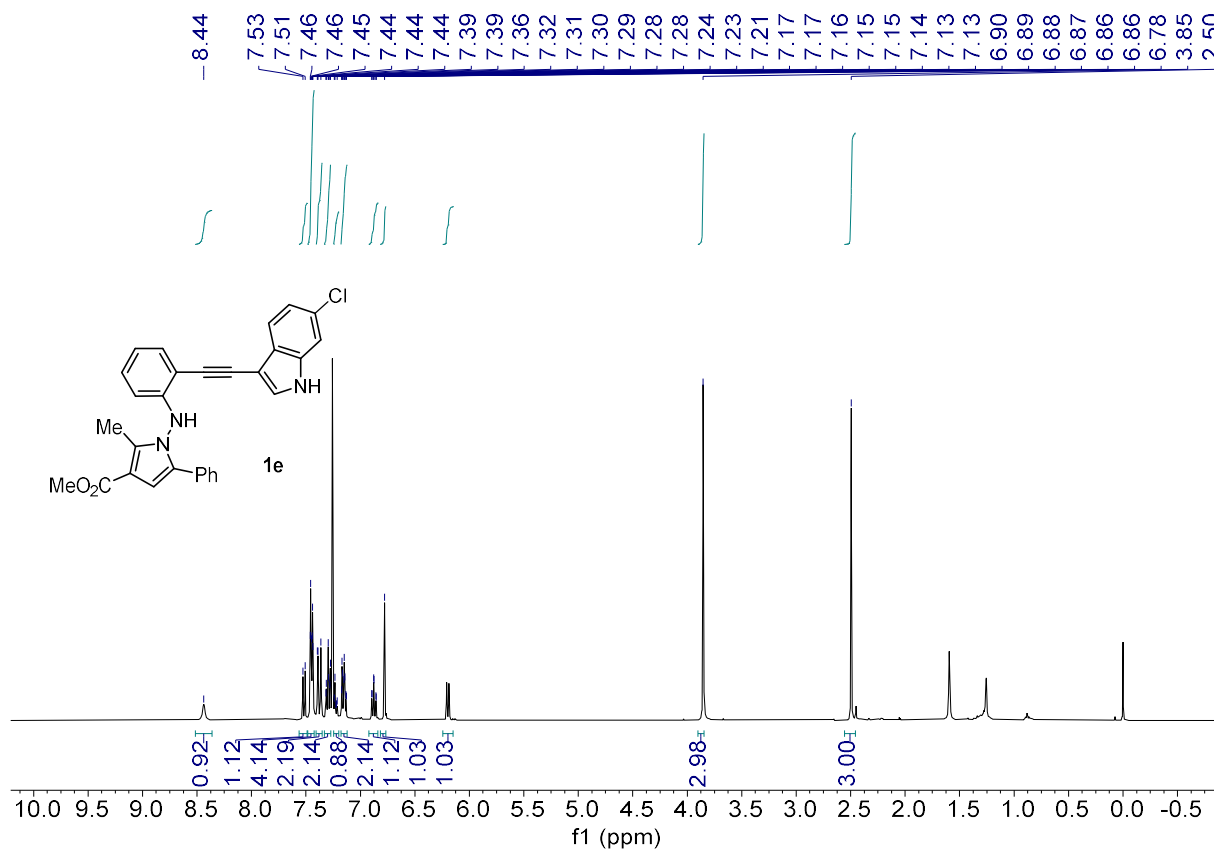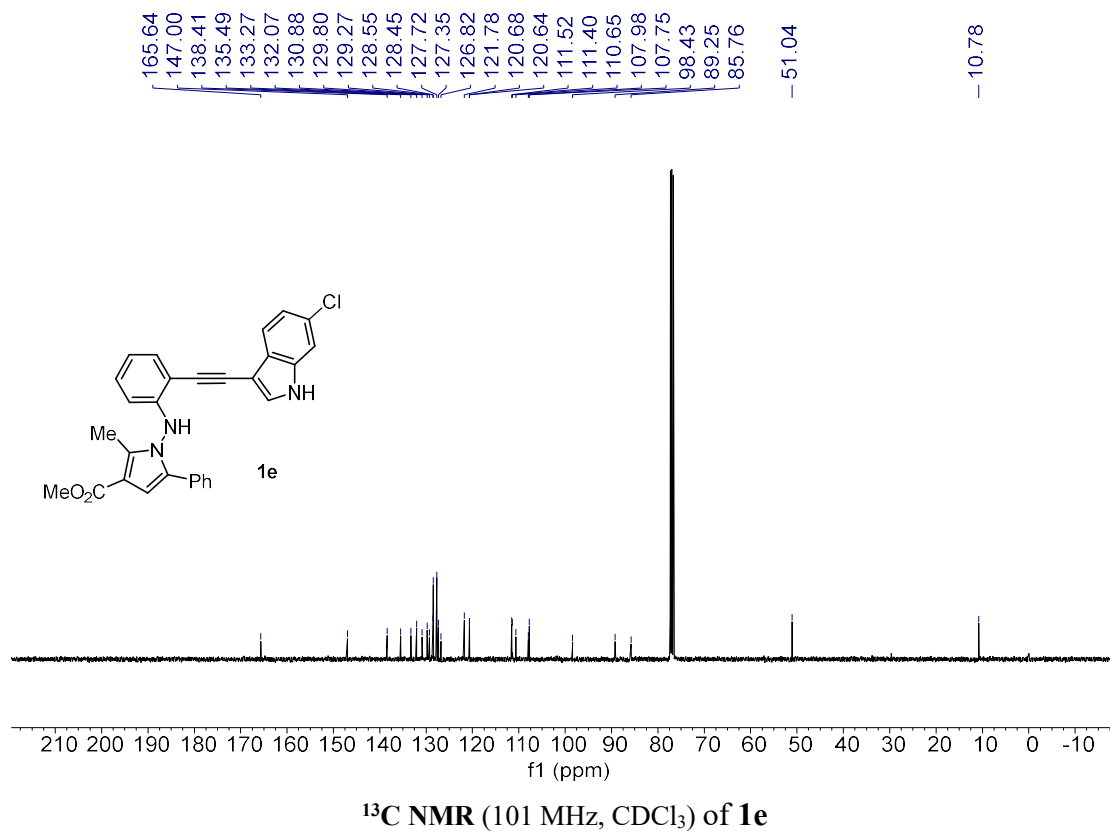



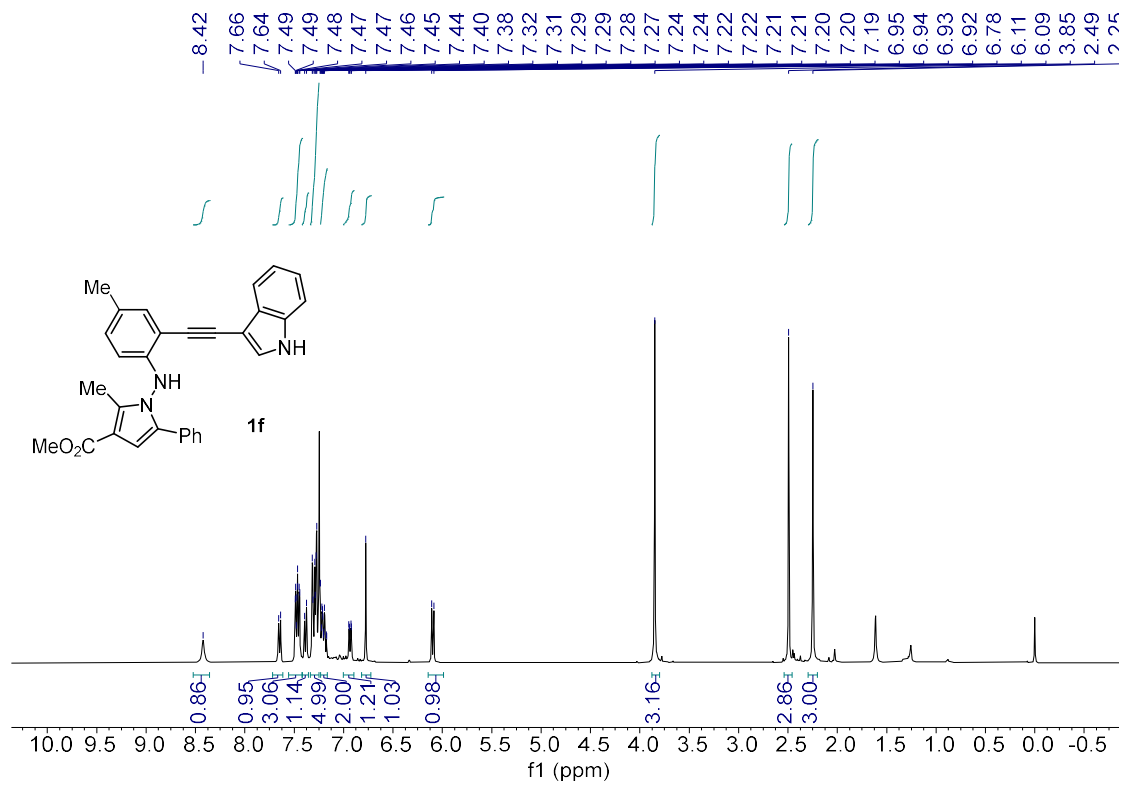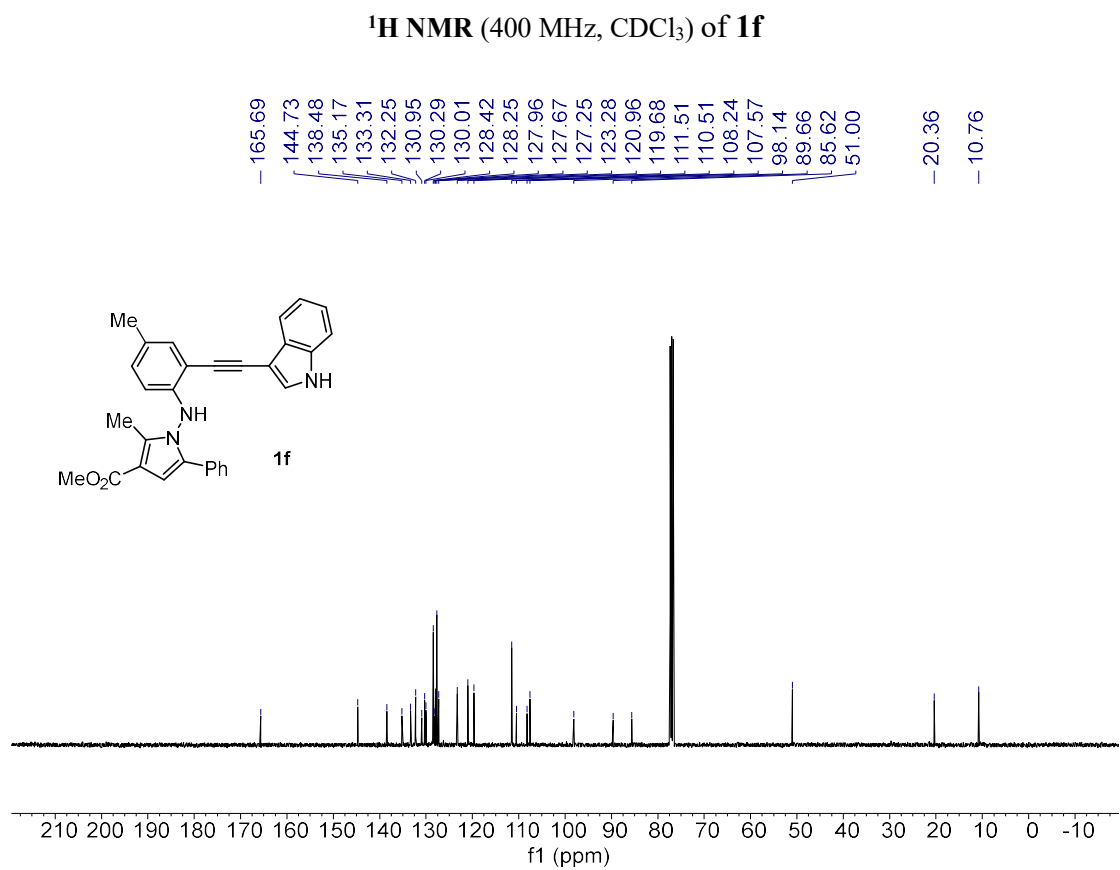

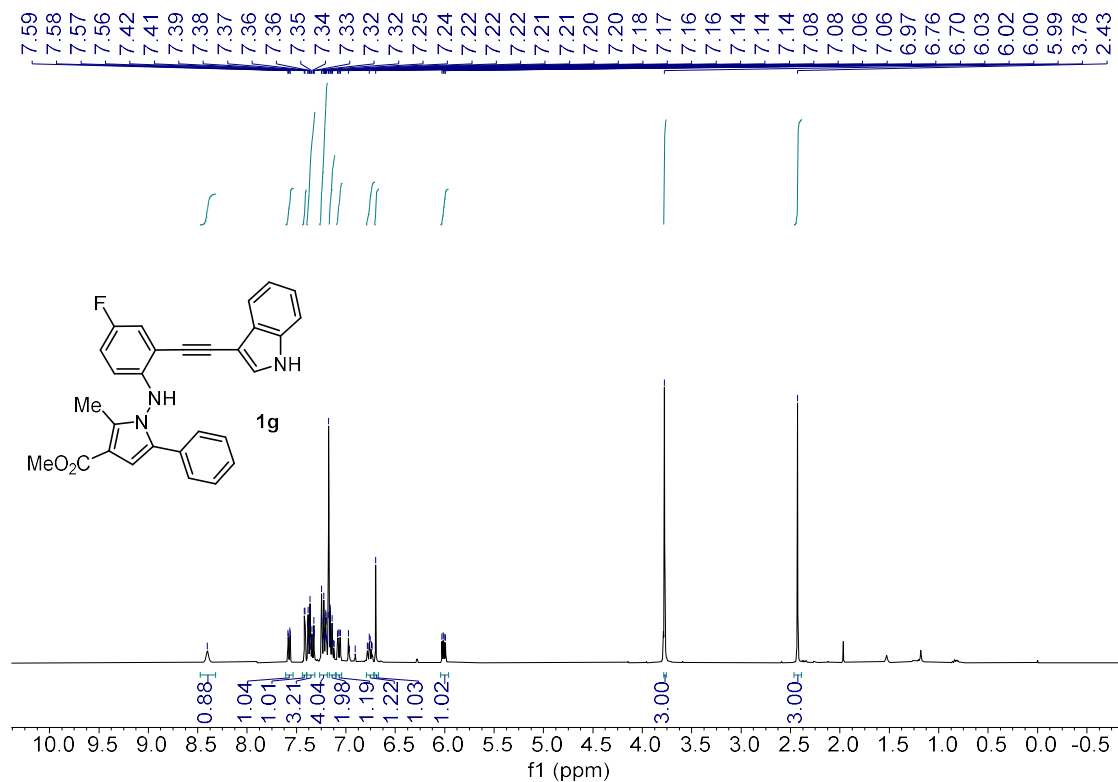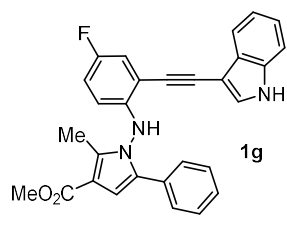

<sup>1</sup>H NMR (400 MHz, CDCl<sub>3</sub>) of **1g**

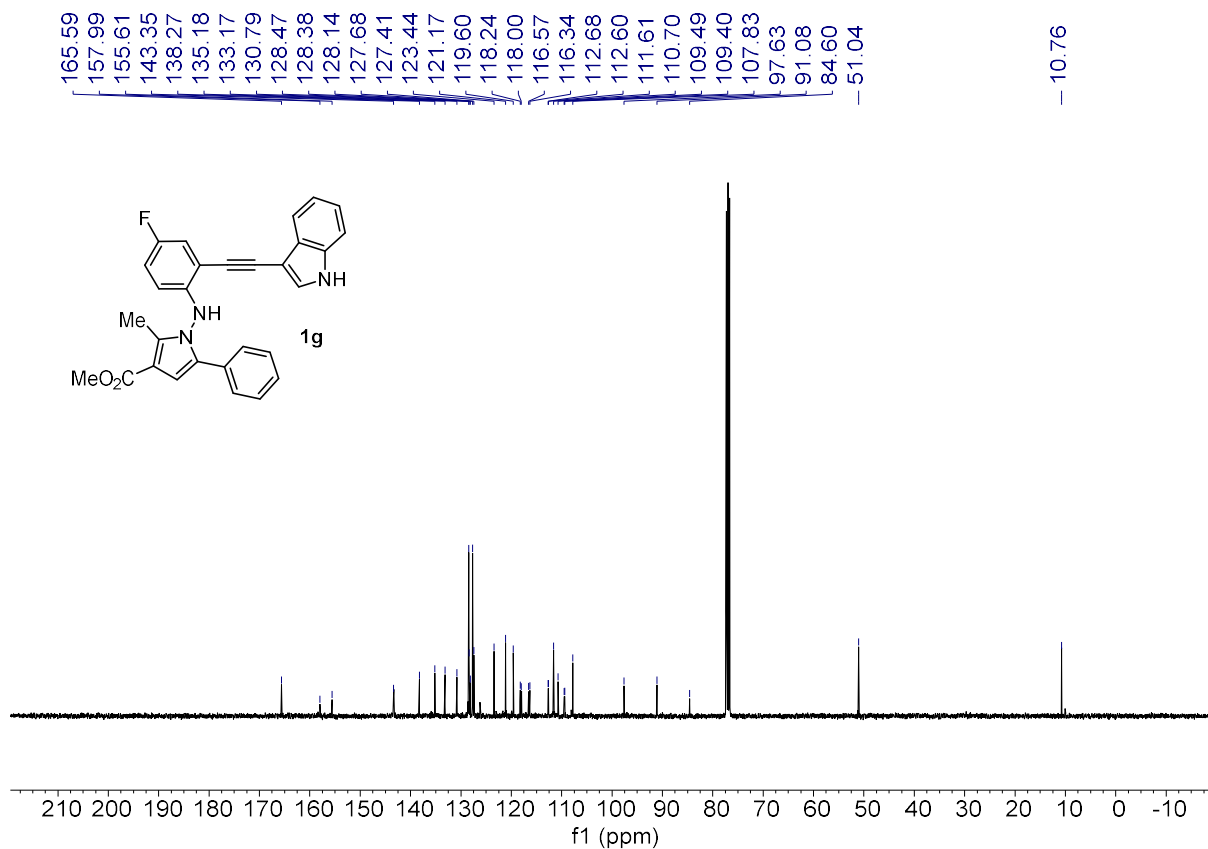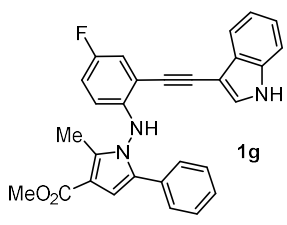

<sup>13</sup>C NMR (101 MHz, CDCl<sub>3</sub>) of **1g**

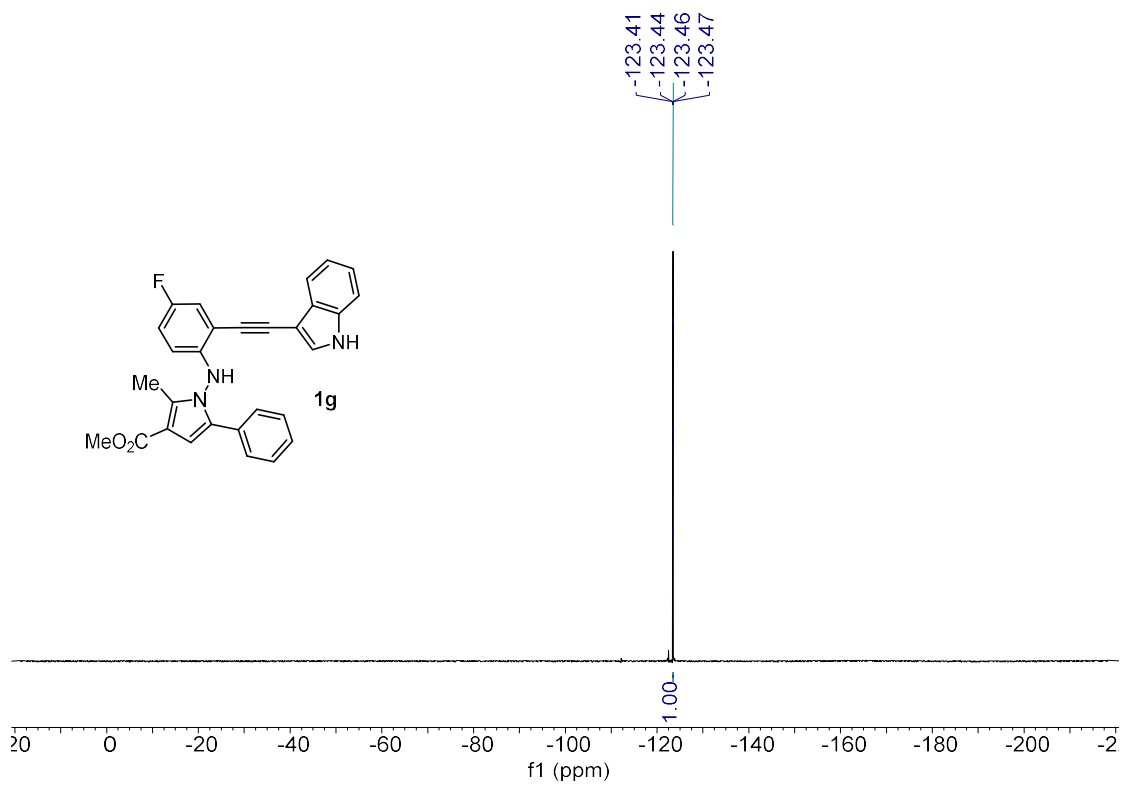

$^{19}\text{F}$  NMR (376 MHz,  $\text{CDCl}_3$ ) of **1g**

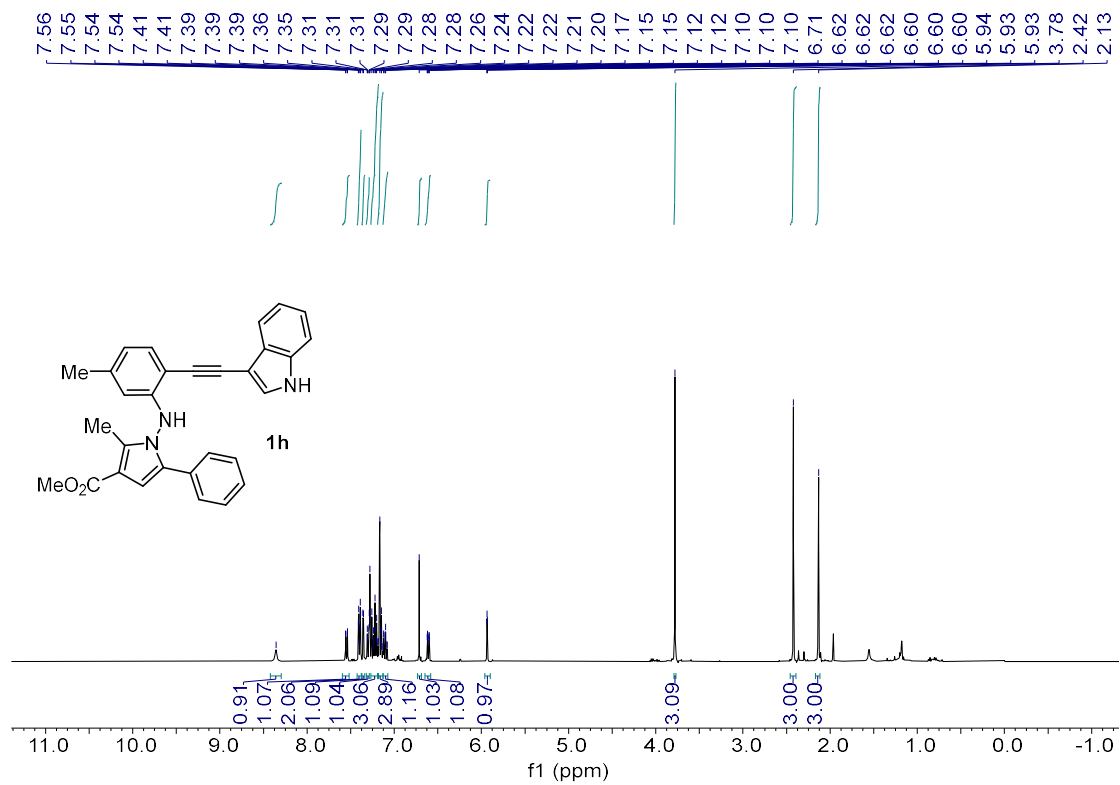

<sup>1</sup>H NMR (400 MHz, CDCl<sub>3</sub>) of **1h**

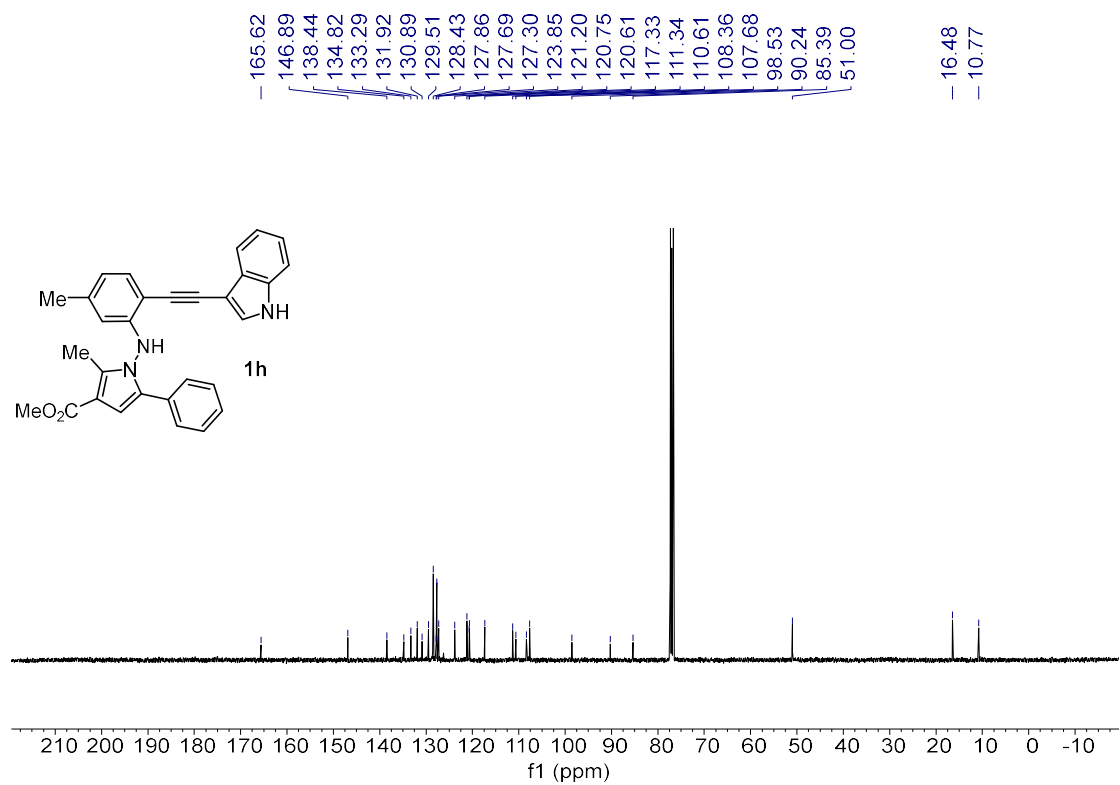

<sup>13</sup>C NMR (101 MHz, CDCl<sub>3</sub>) of **1h**

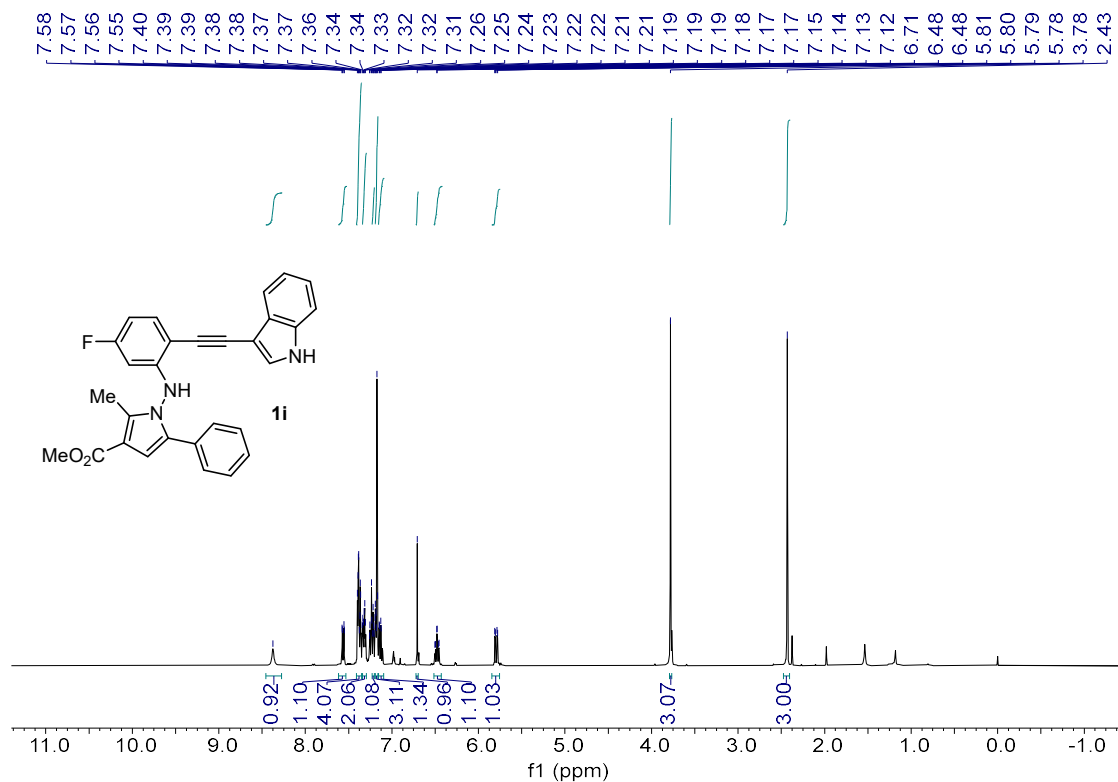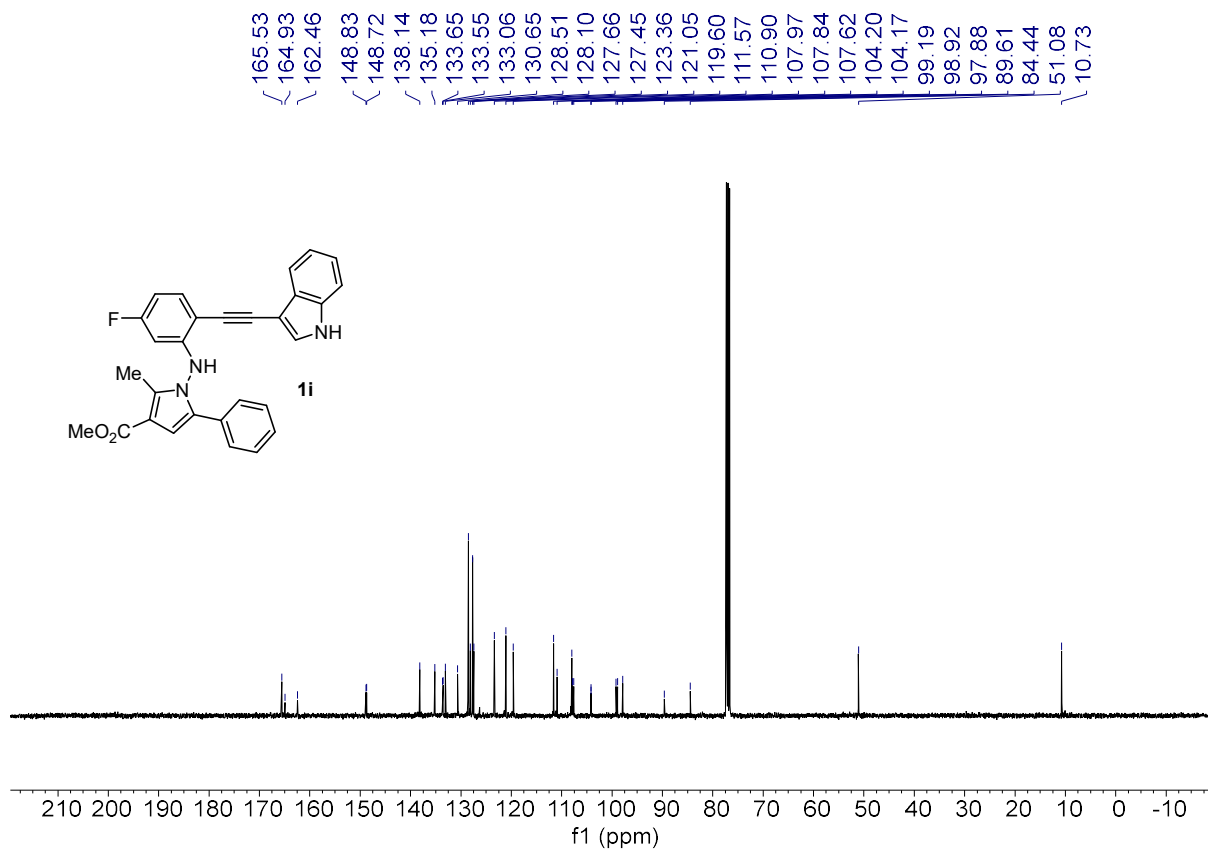

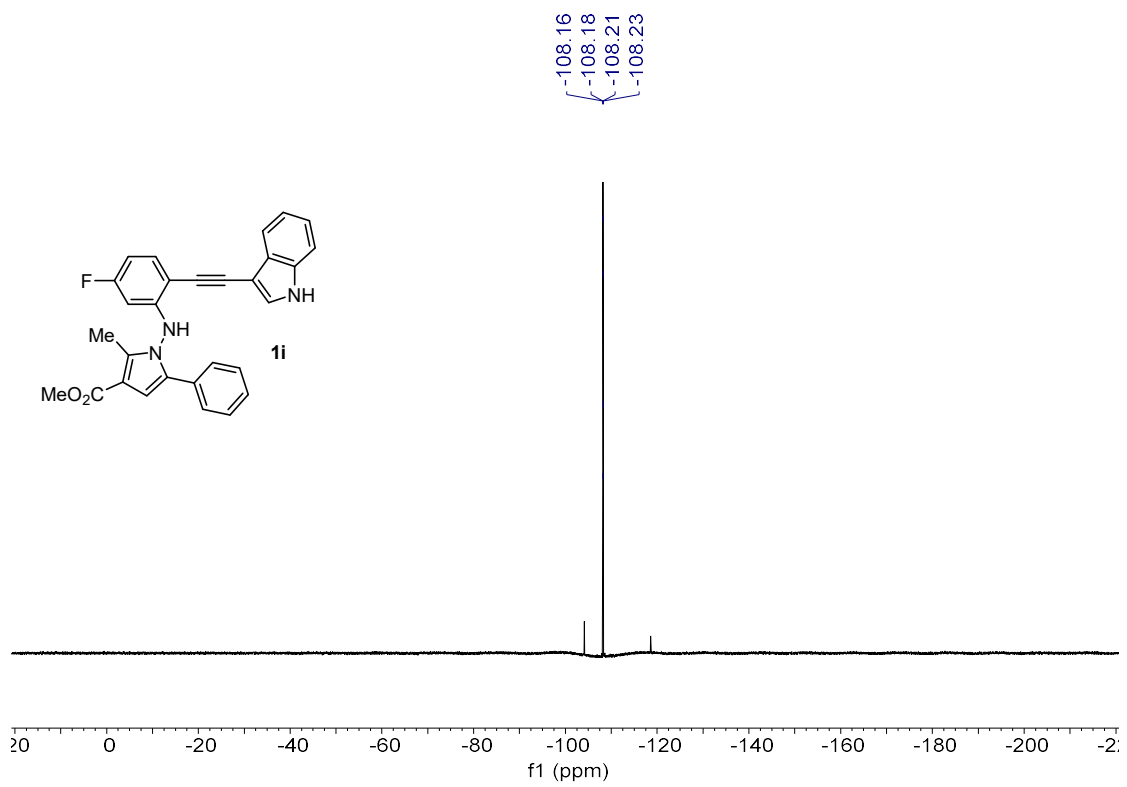

<sup>19</sup>F NMR (376 MHz, CDCl<sub>3</sub>) of **1i**

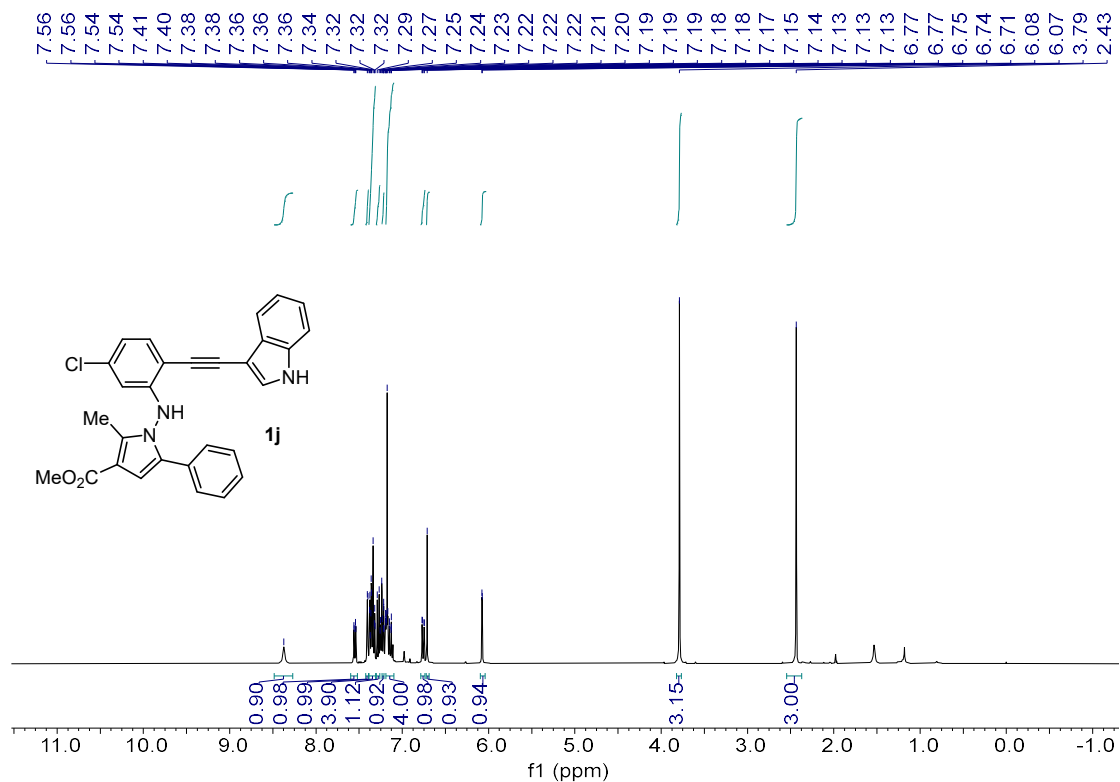

<sup>1</sup>H NMR (400 MHz, CDCl<sub>3</sub>) of **1j**

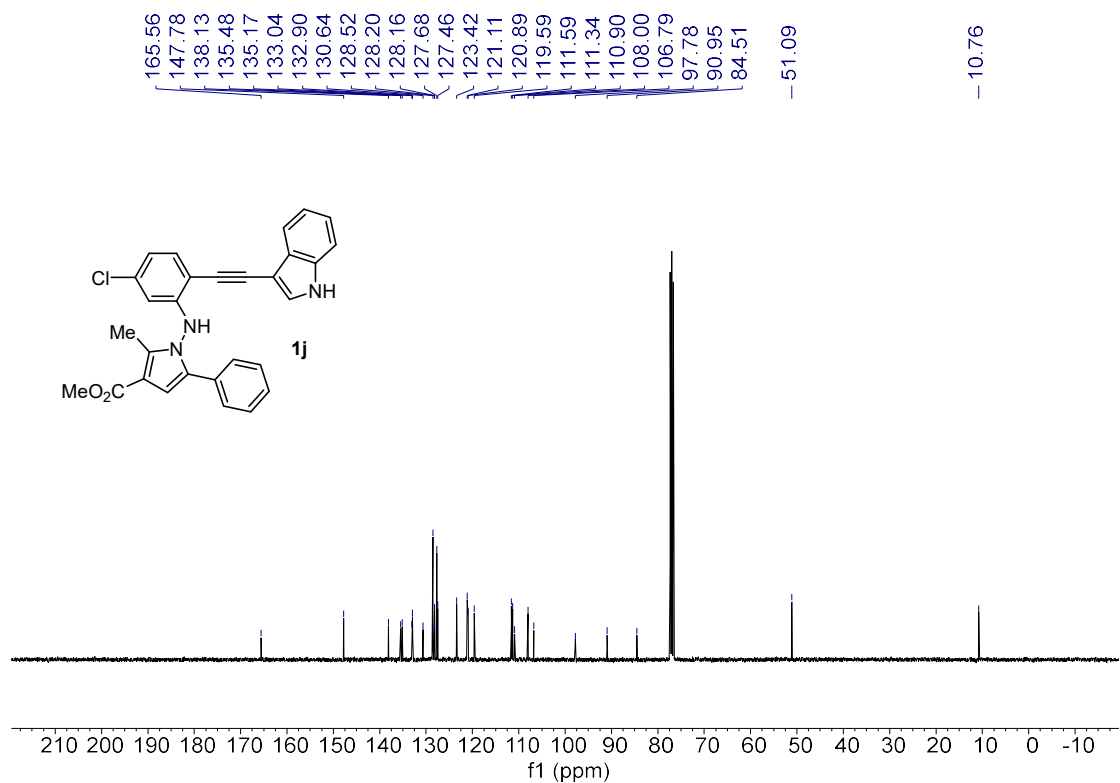

<sup>13</sup>C NMR (101 MHz, CDCl<sub>3</sub>) of **1j**

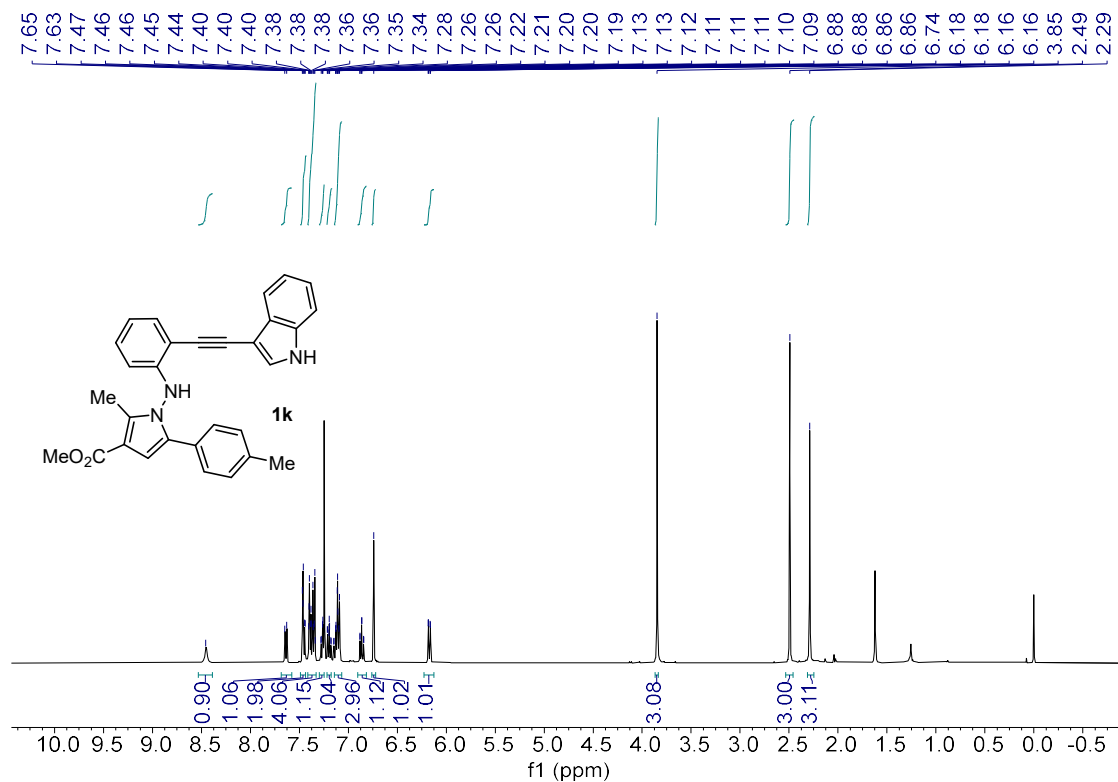

<sup>1</sup>H NMR (400 MHz, CDCl<sub>3</sub>) of **1k**

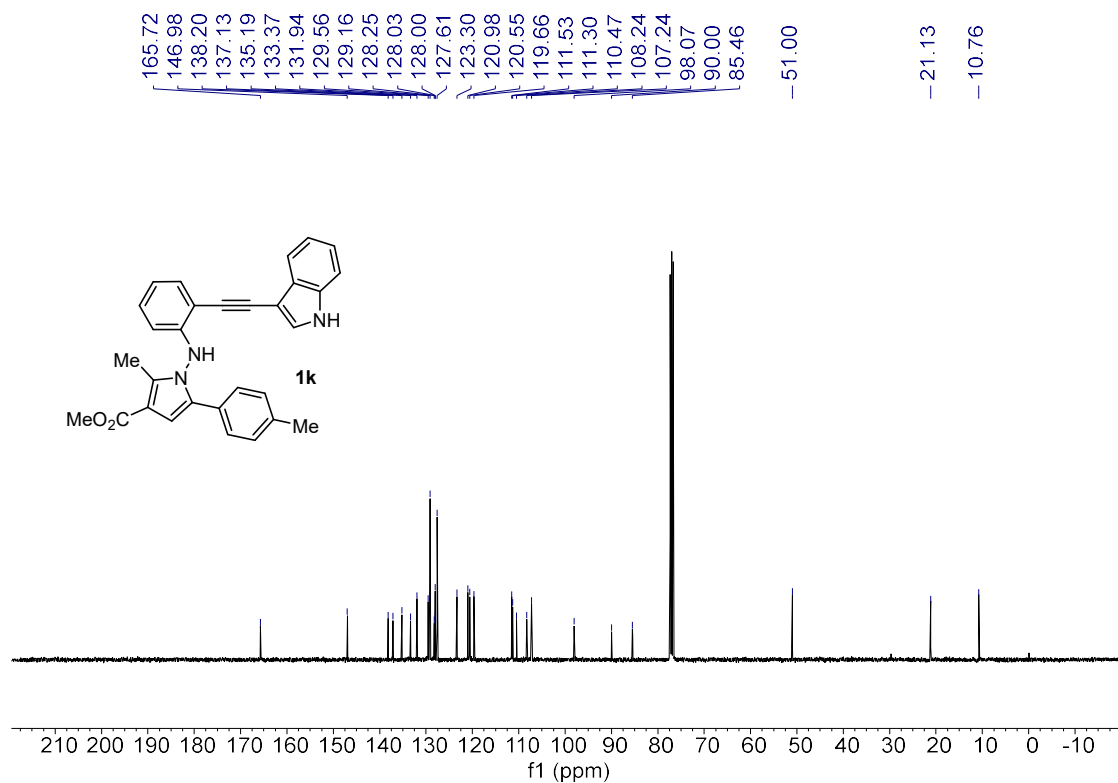

<sup>13</sup>C NMR (101 MHz, CDCl<sub>3</sub>) of **1k**



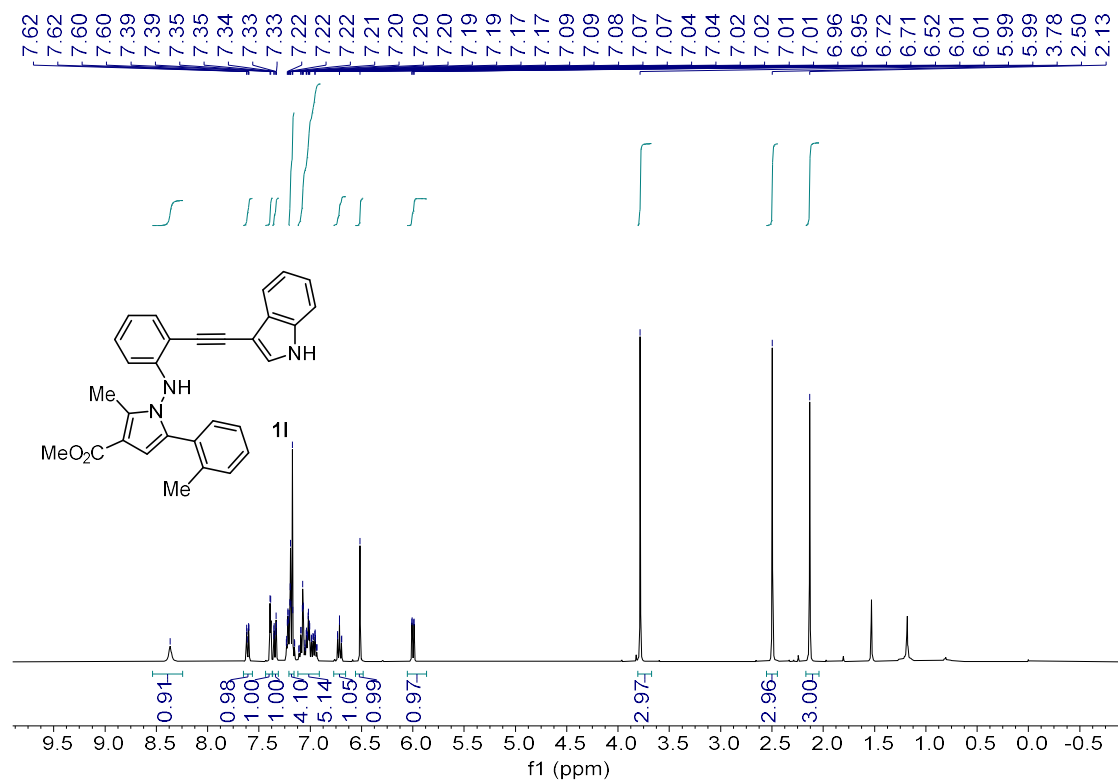

**<sup>1</sup>H NMR (400 MHz, CDCl<sub>3</sub>) of **11****

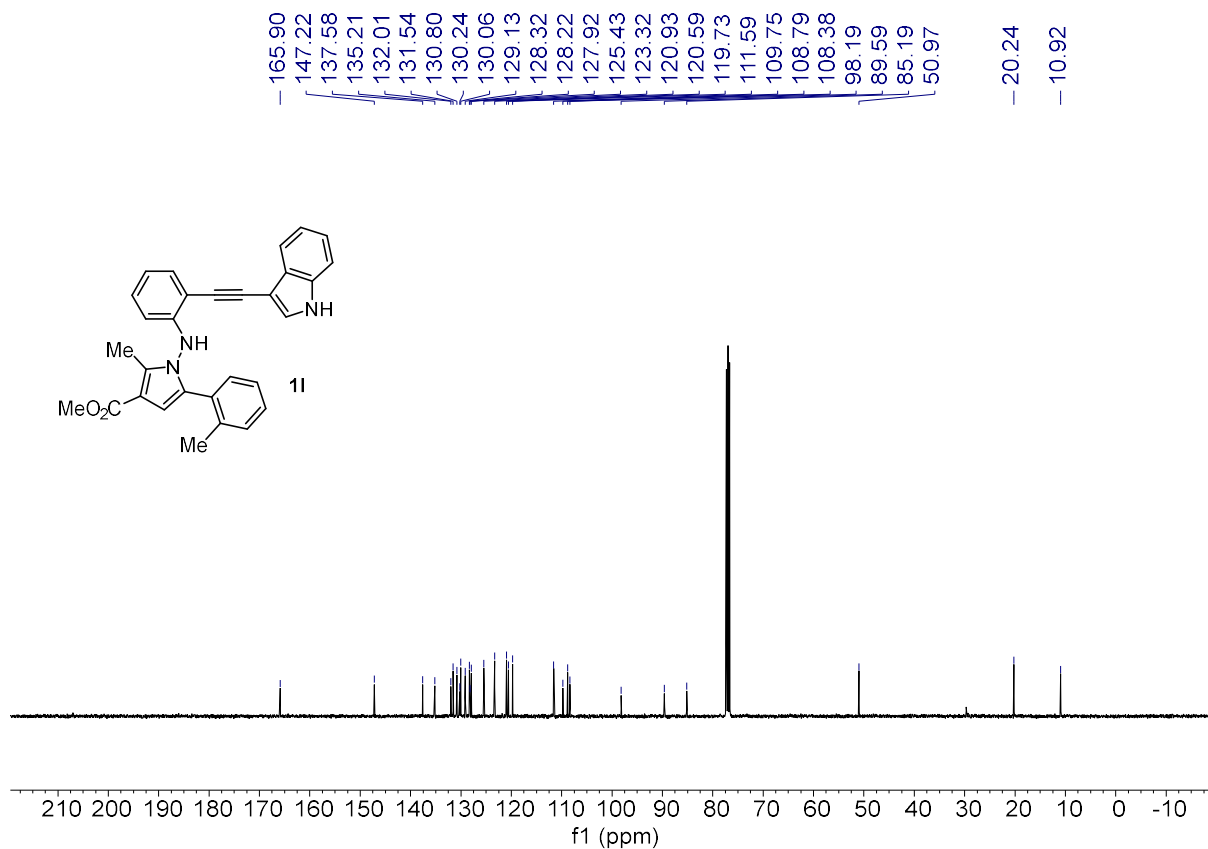

**<sup>13</sup>C NMR (101 MHz, CDCl<sub>3</sub>) of **11****

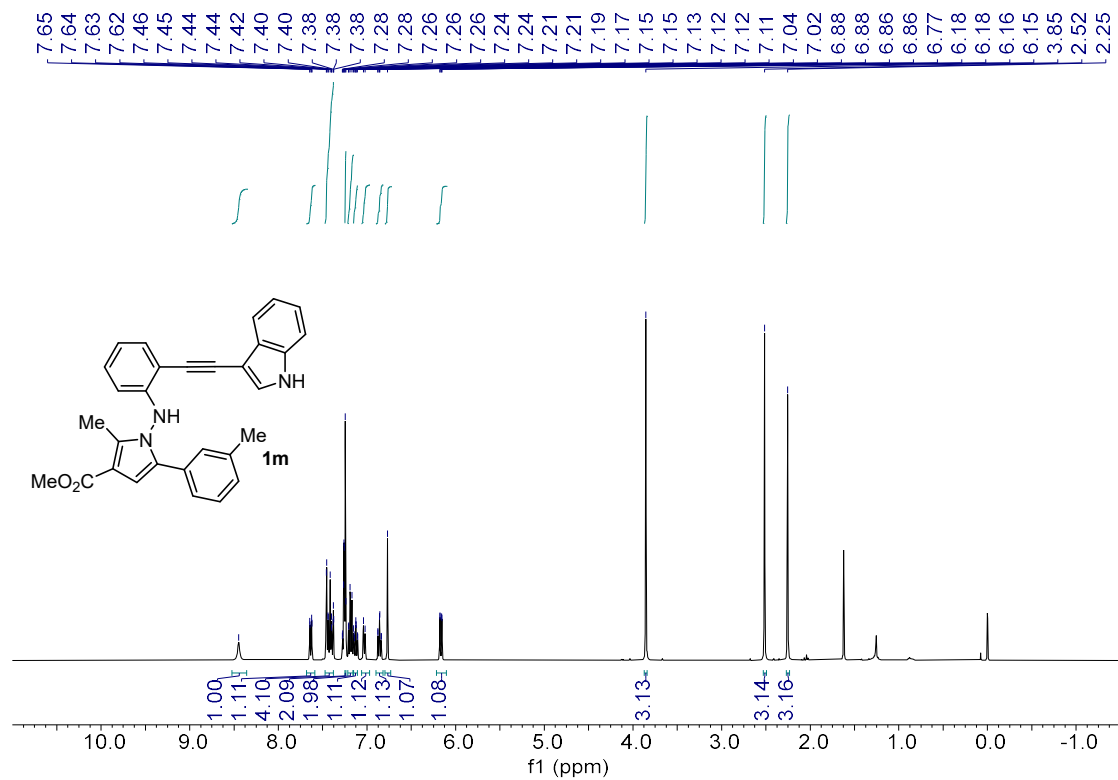

<sup>1</sup>H NMR (400 MHz, CDCl<sub>3</sub>) of **1m**

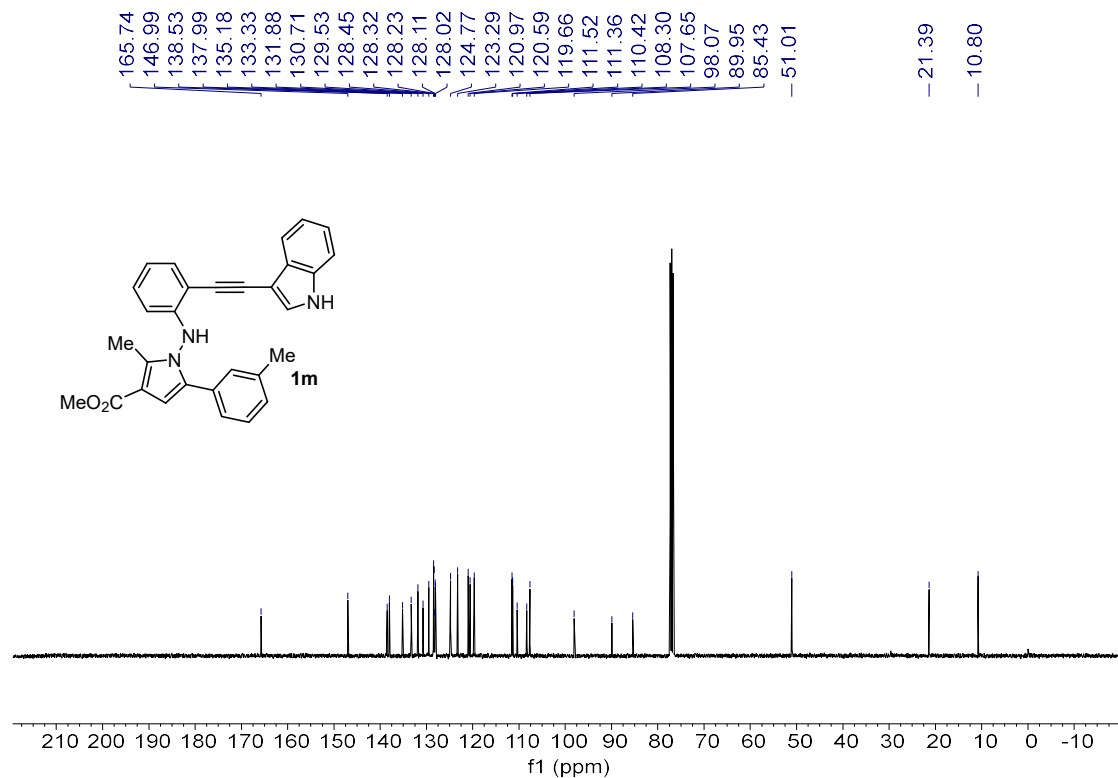

<sup>13</sup>C NMR (101 MHz, CDCl<sub>3</sub>) of **1m**

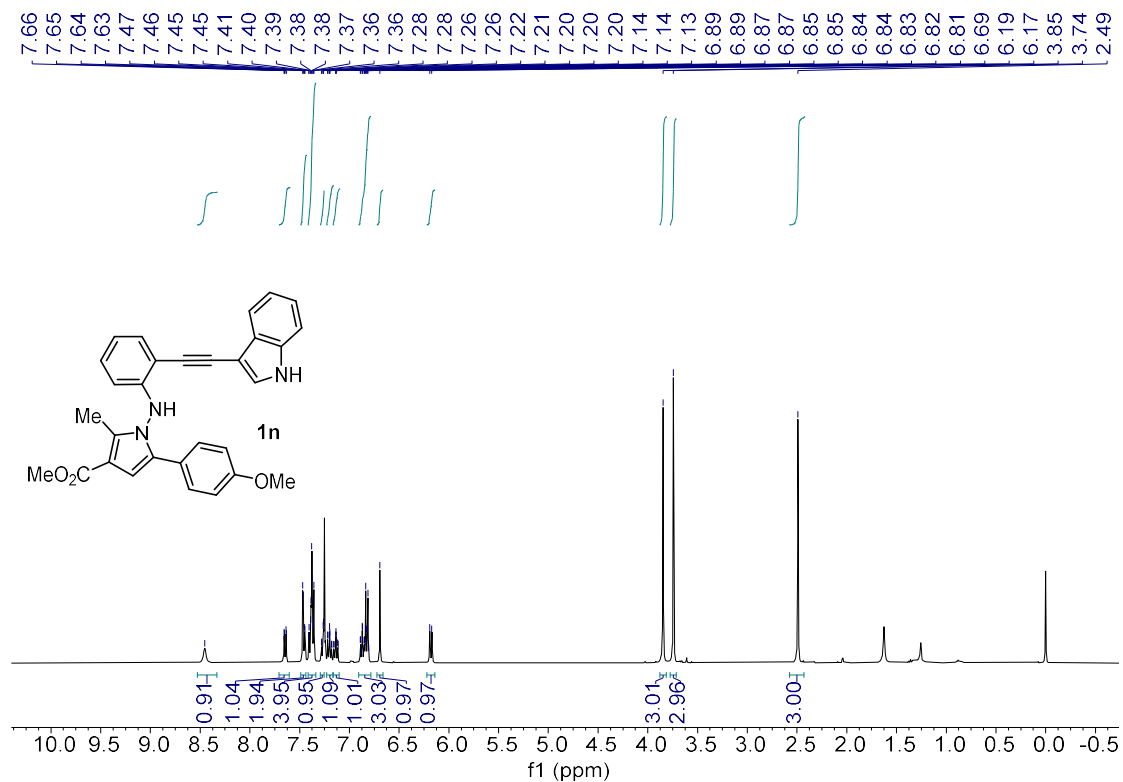

<sup>1</sup>H NMR (400 MHz, CDCl<sub>3</sub>) of **1n**

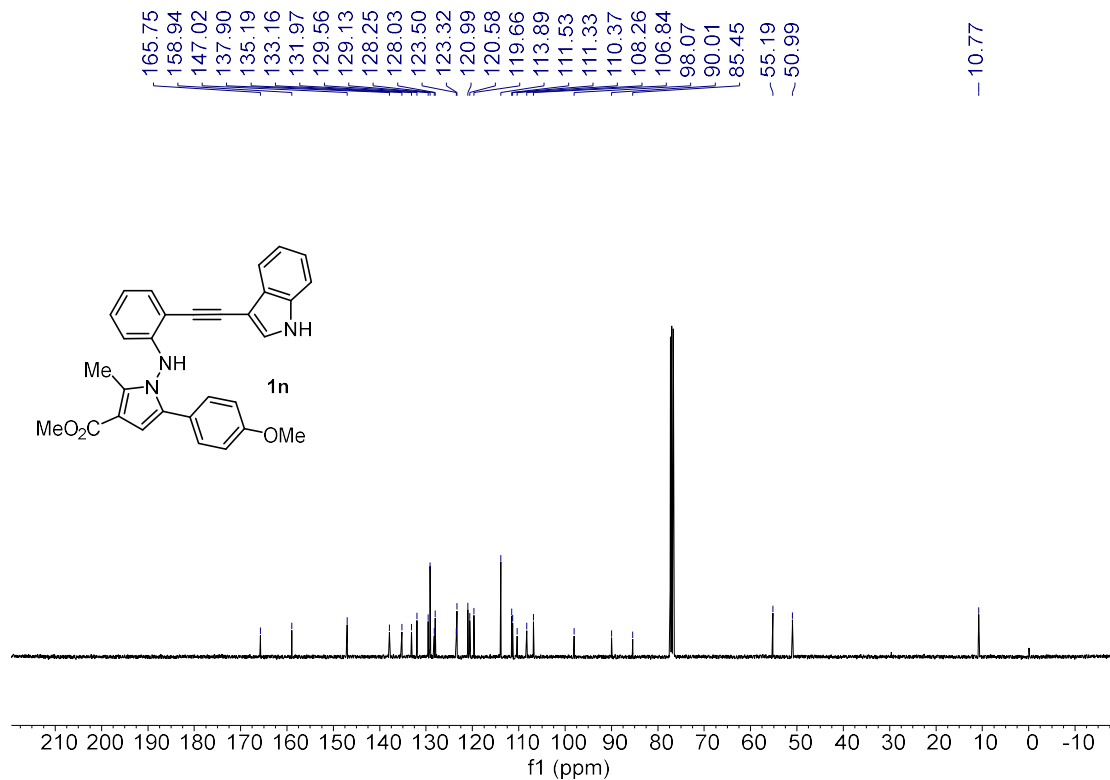

<sup>13</sup>C NMR (101 MHz, CDCl<sub>3</sub>) of **1n**

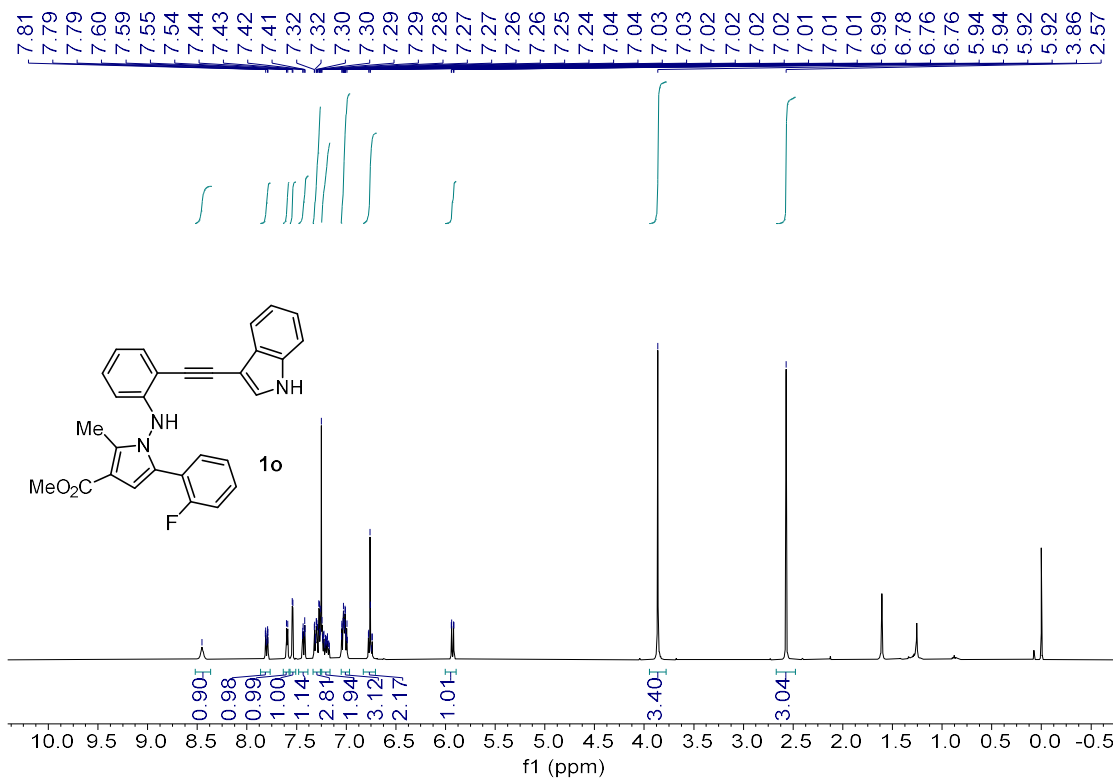

<sup>1</sup>H NMR (400 MHz, CDCl<sub>3</sub>) of **1o**

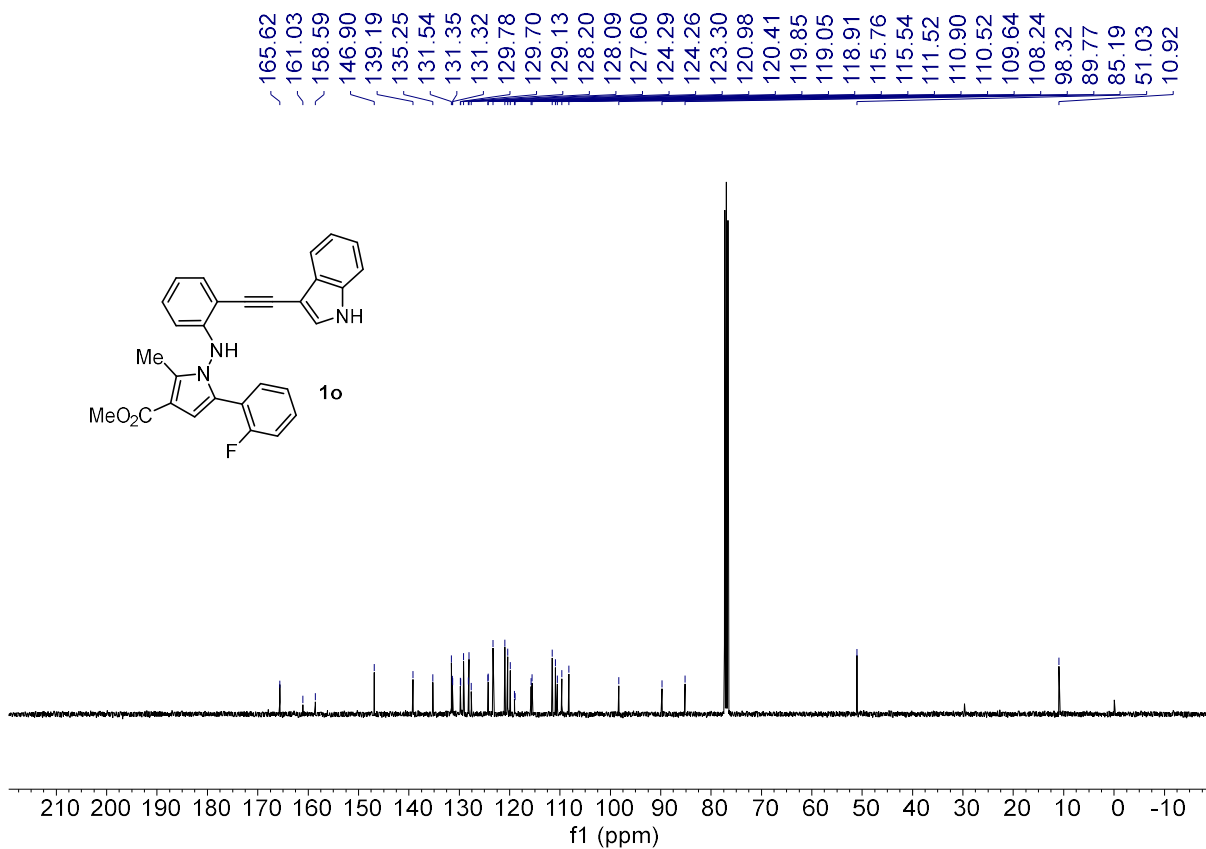

<sup>13</sup>C NMR (101 MHz, CDCl<sub>3</sub>) of **1o**

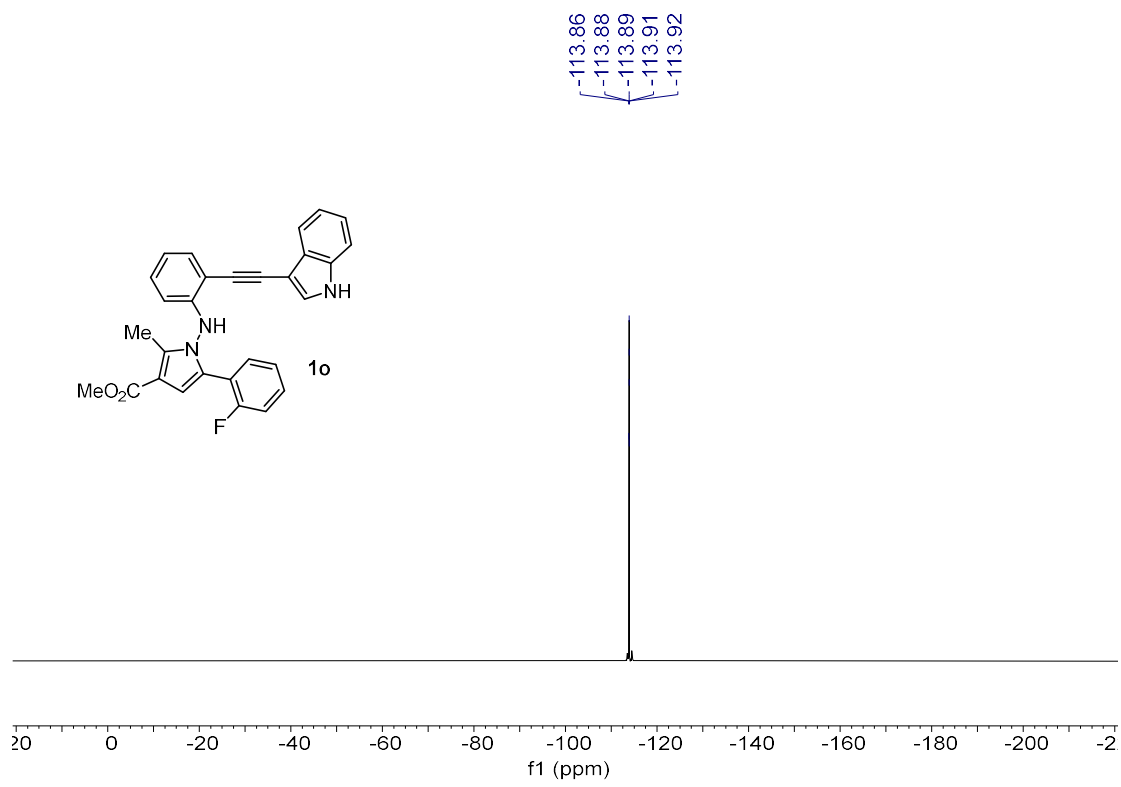

**<sup>19</sup>F NMR (376 MHz, CDCl<sub>3</sub>) of 1o**

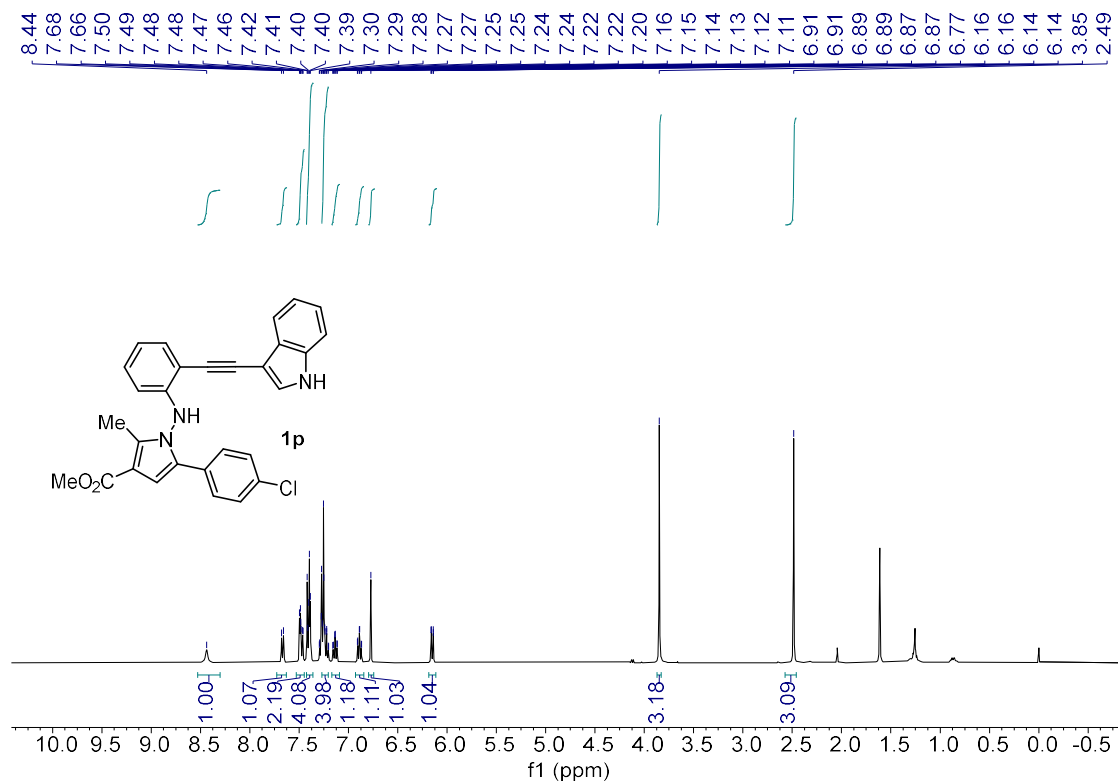

<sup>1</sup>H NMR (400 MHz, CDCl<sub>3</sub>) of **1p**

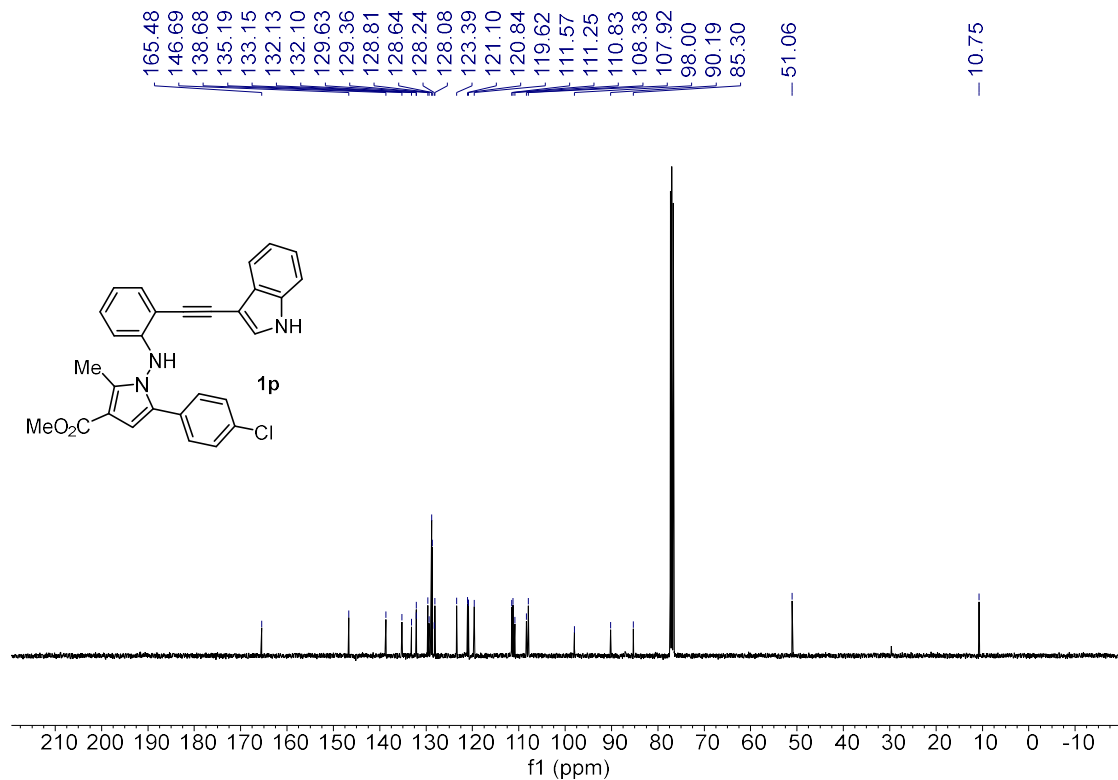

<sup>13</sup>C NMR (101 MHz, CDCl<sub>3</sub>) of **1p**

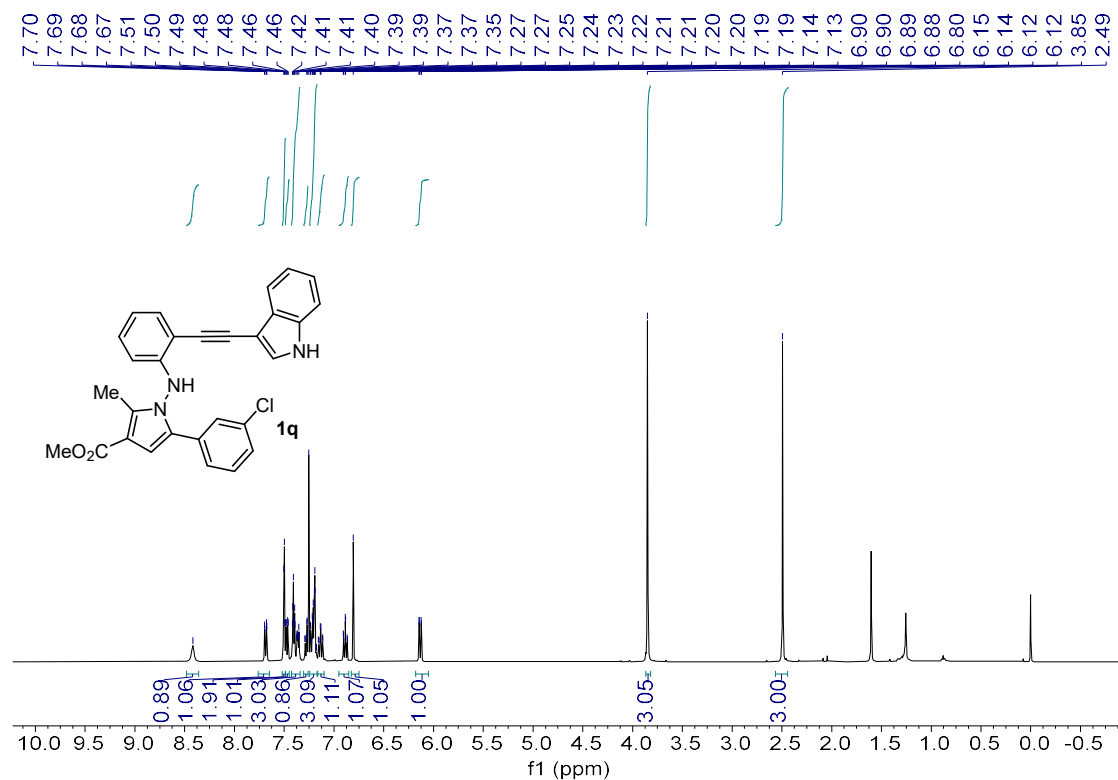

**<sup>1</sup>H NMR (400 MHz, CDCl<sub>3</sub>) of **1q****

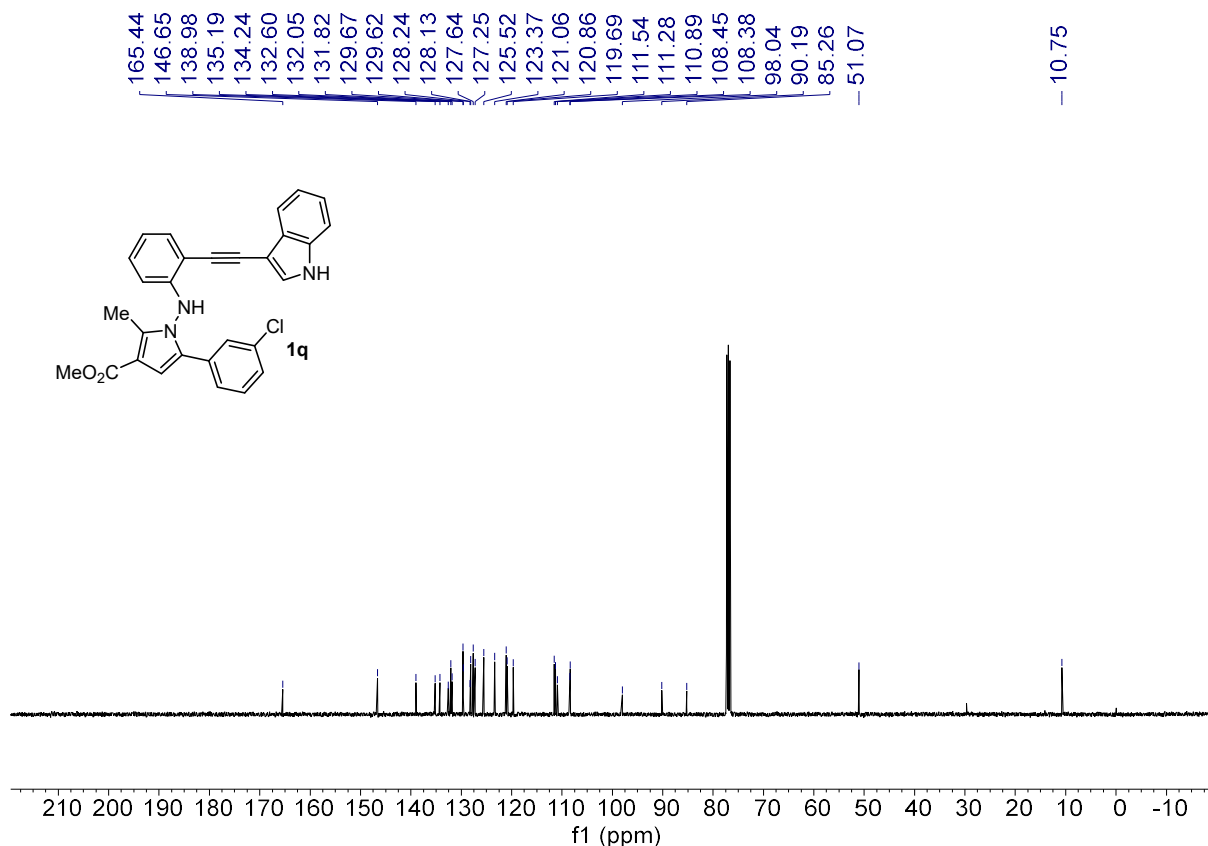

**<sup>13</sup>C NMR (101 MHz, CDCl<sub>3</sub>) of **1q****

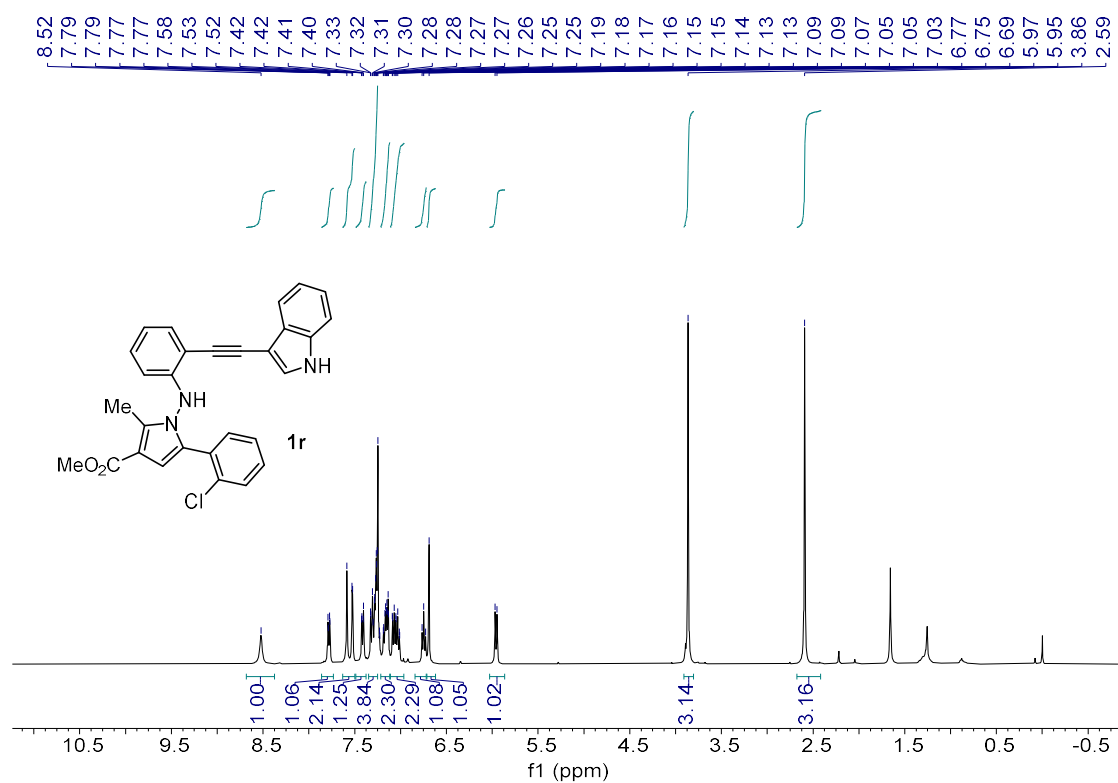

<sup>1</sup>H NMR (400 MHz, CDCl<sub>3</sub>) of **1r**

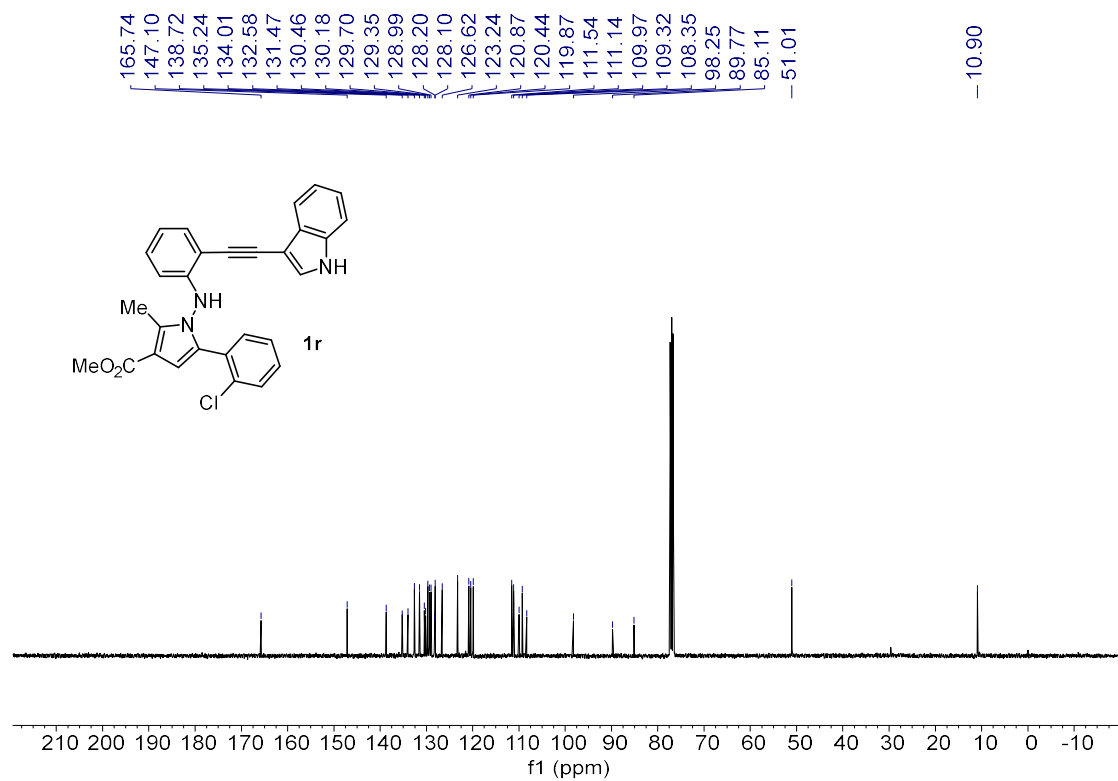

<sup>13</sup>C NMR (101 MHz, CDCl<sub>3</sub>) of **1r**



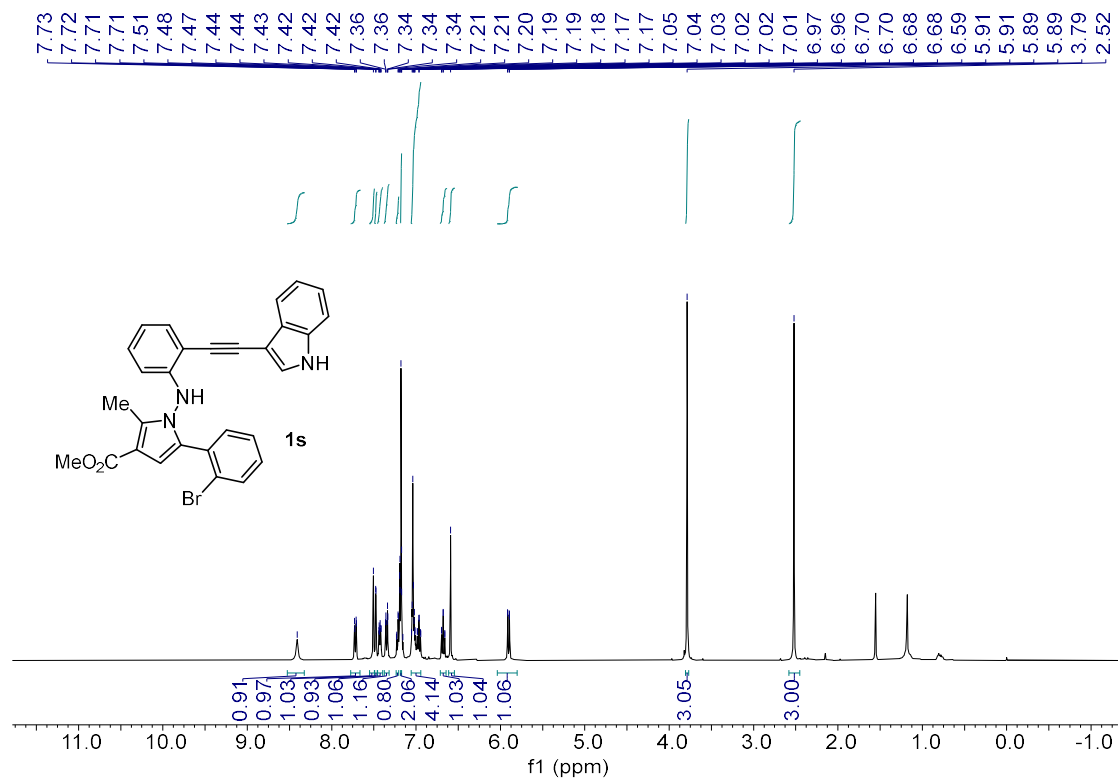

<sup>1</sup>H NMR (400 MHz, CDCl<sub>3</sub>) of **1s**

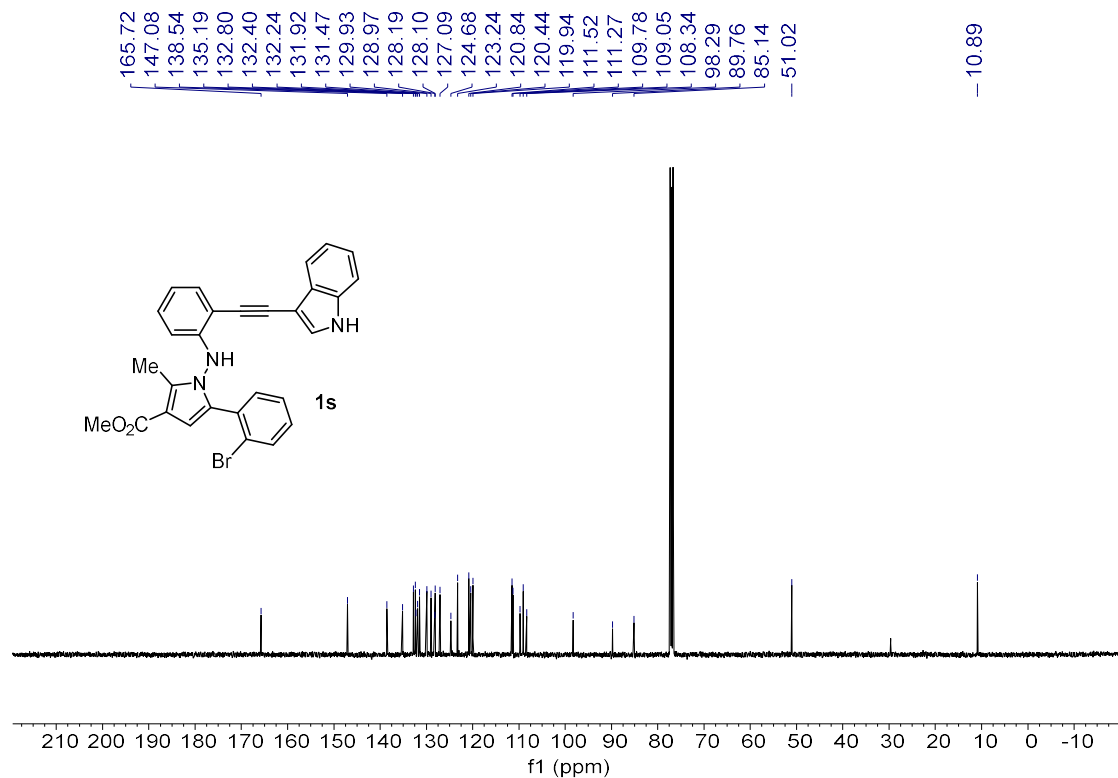

<sup>13</sup>C NMR (101 MHz, CDCl<sub>3</sub>) of **1s**

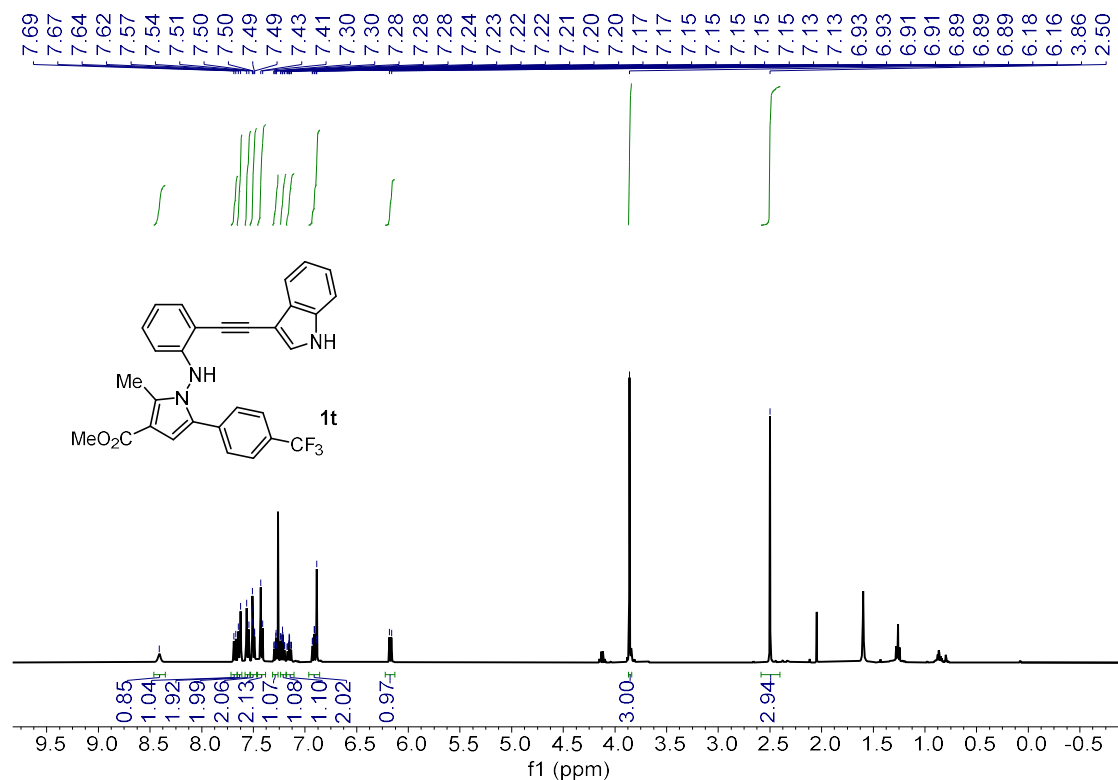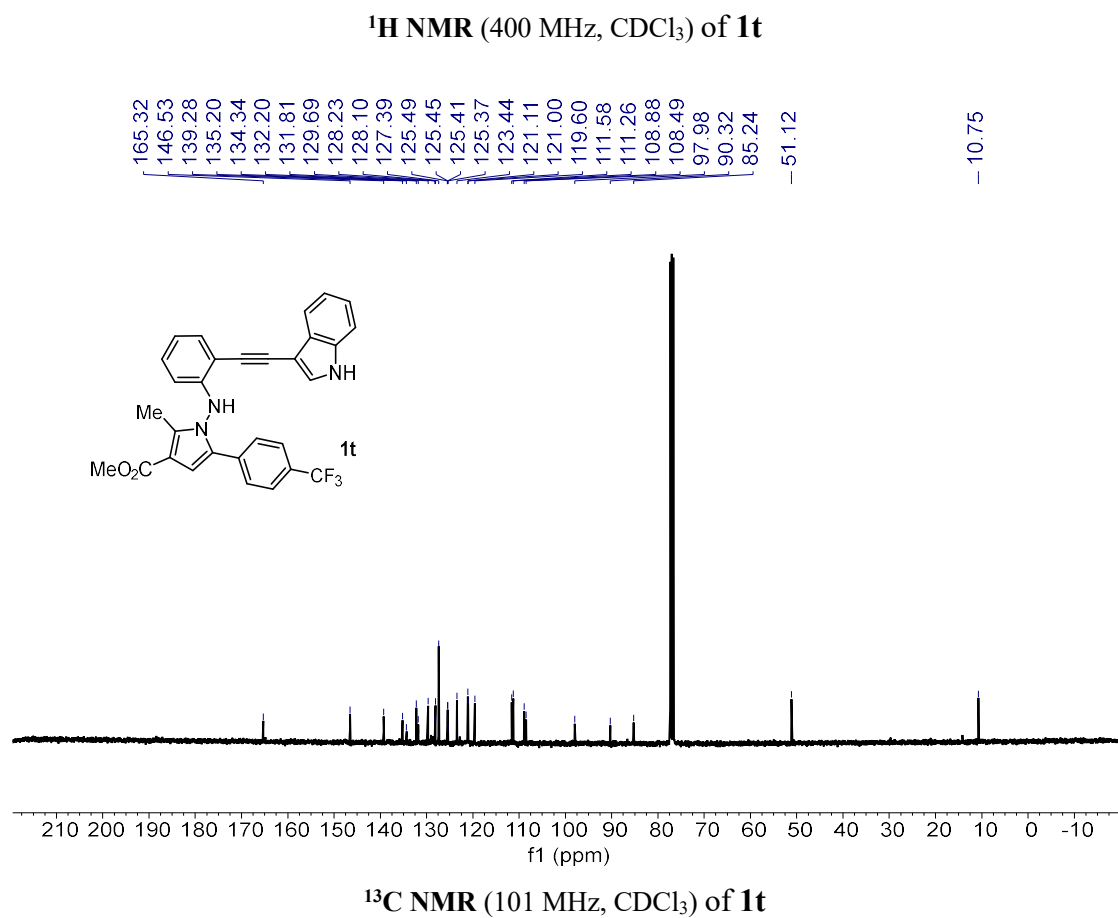

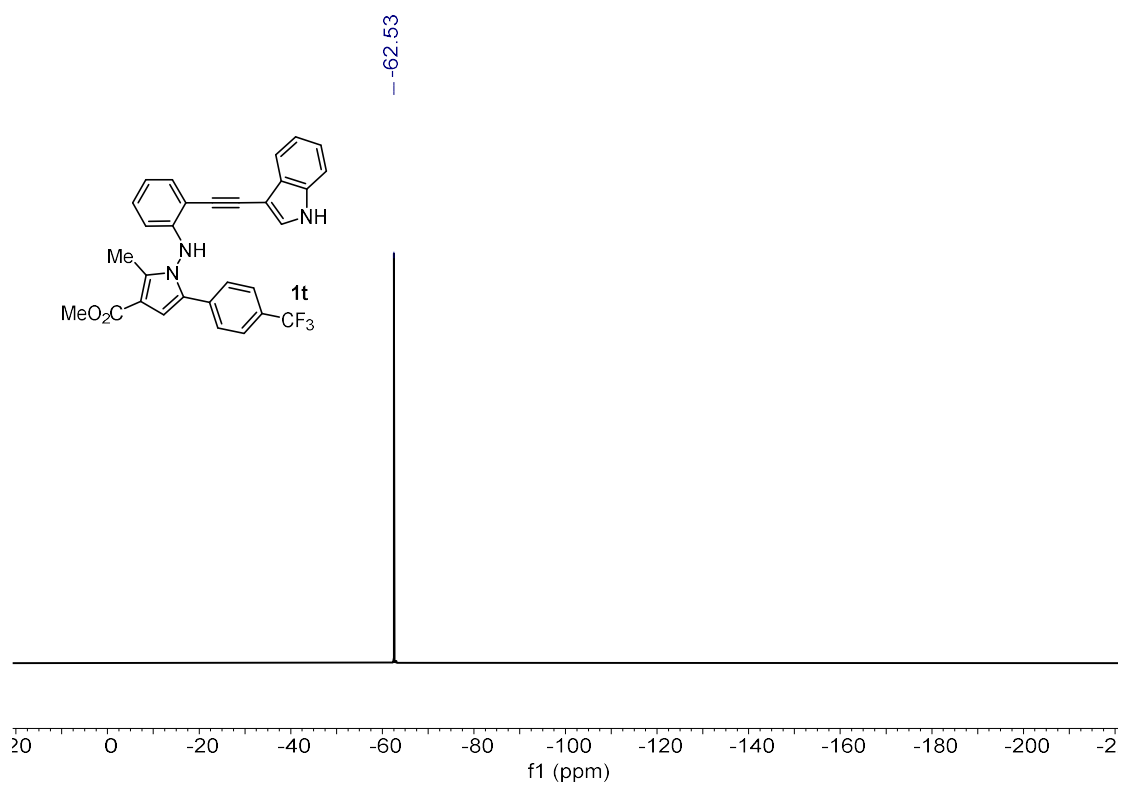

**<sup>19</sup>F NMR (376 MHz, CDCl<sub>3</sub>) of **1t****

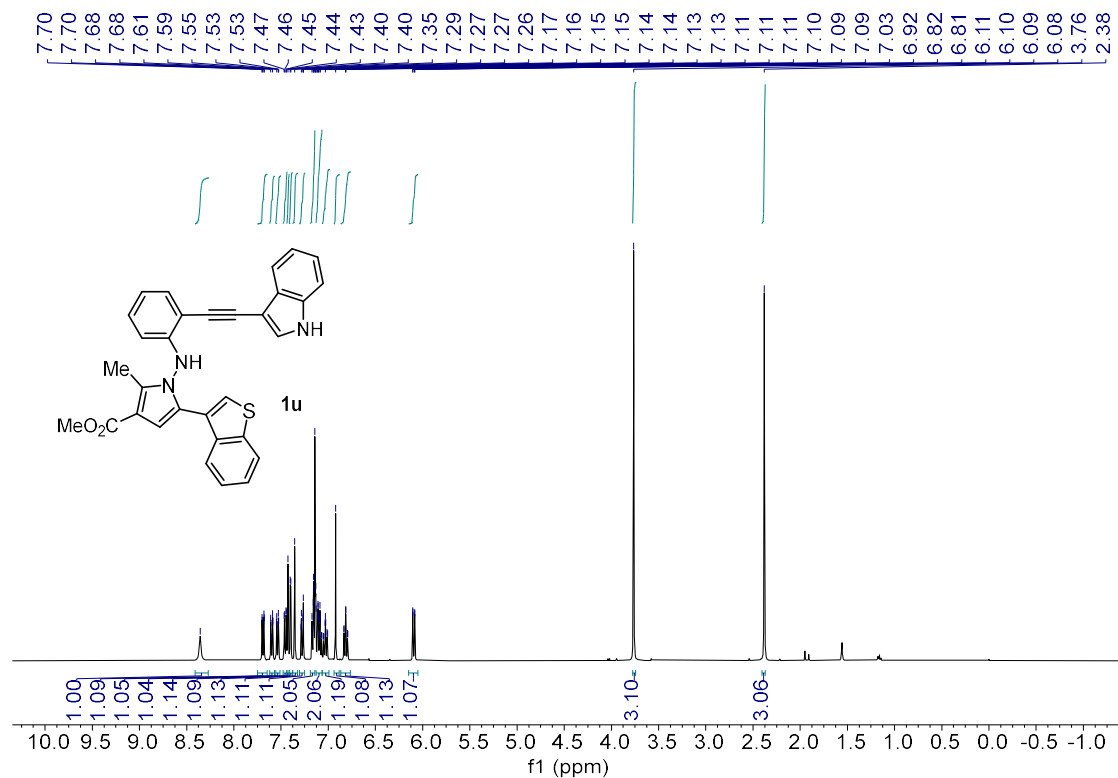

**<sup>1</sup>H NMR (400 MHz, CDCl<sub>3</sub>) of **1u****

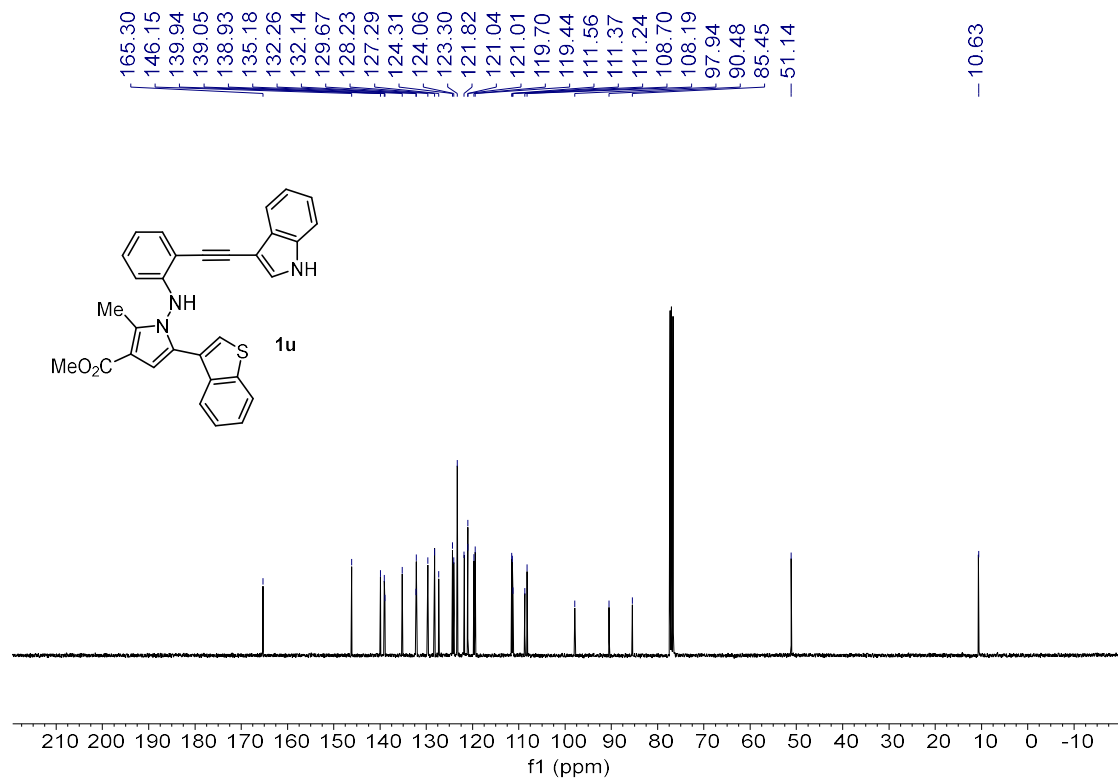

**<sup>13</sup>C NMR (101 MHz, CDCl<sub>3</sub>) of **1u****

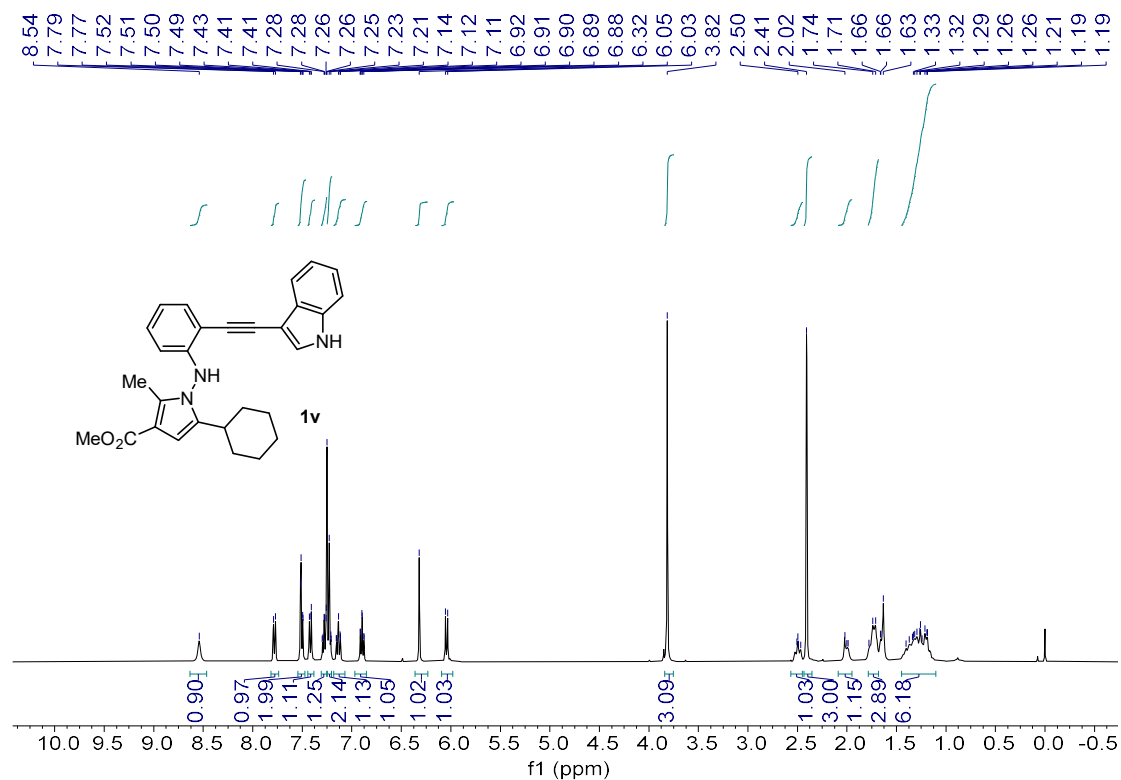

<sup>1</sup>H NMR (400 MHz, CDCl<sub>3</sub>) of **1v**

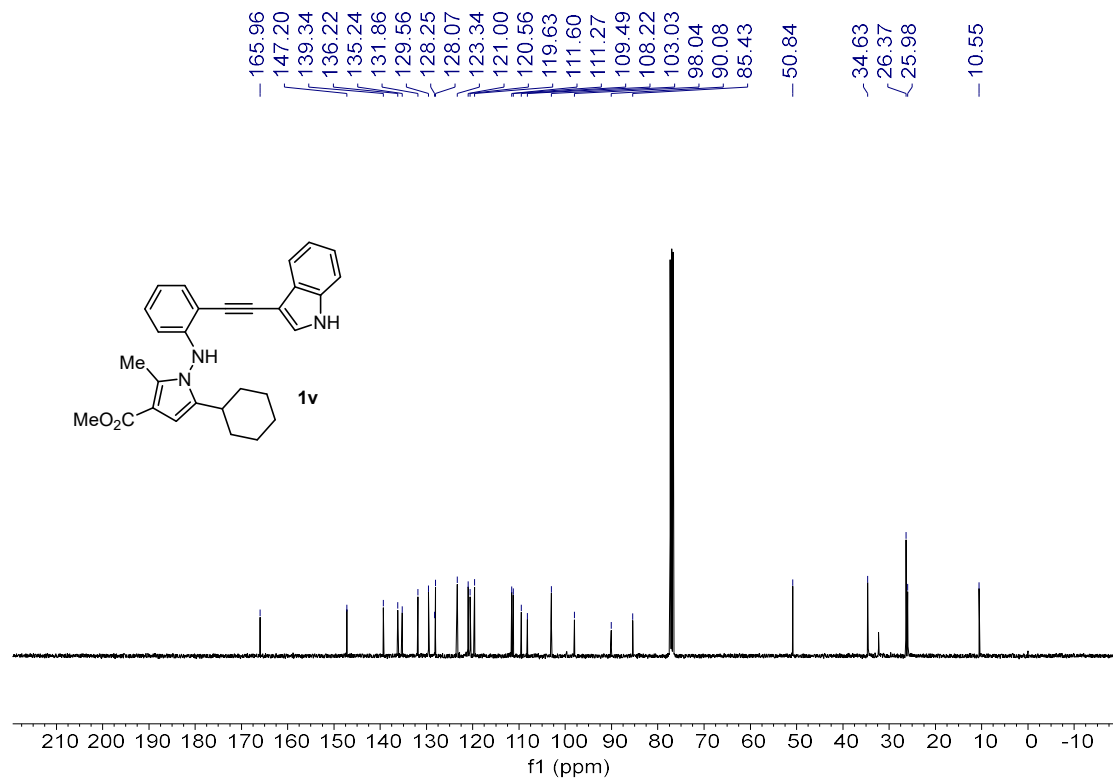

<sup>13</sup>C NMR (101 MHz, CDCl<sub>3</sub>) of **1v**

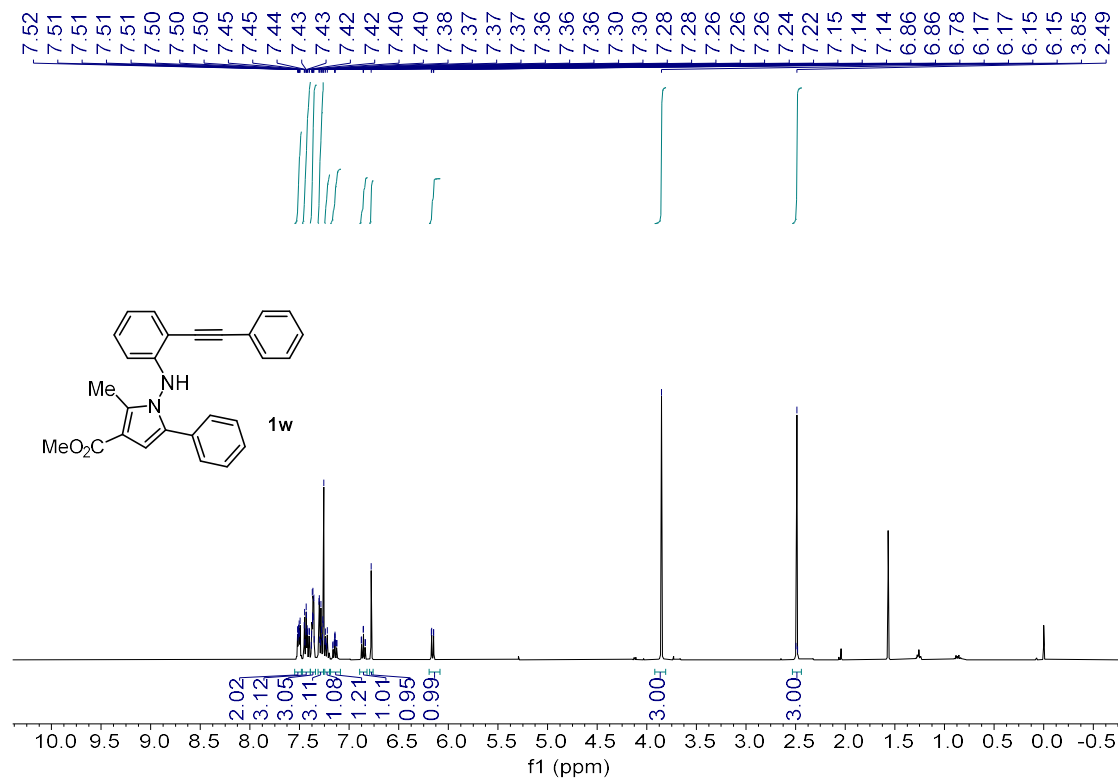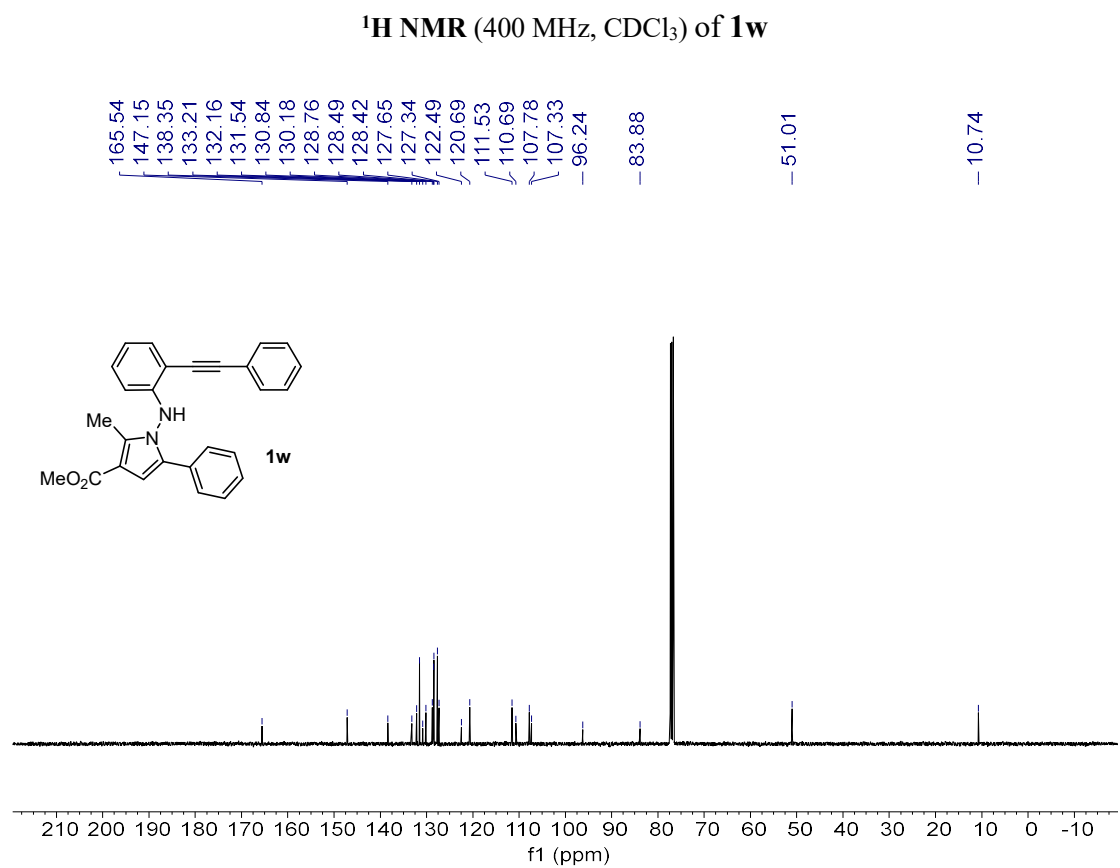

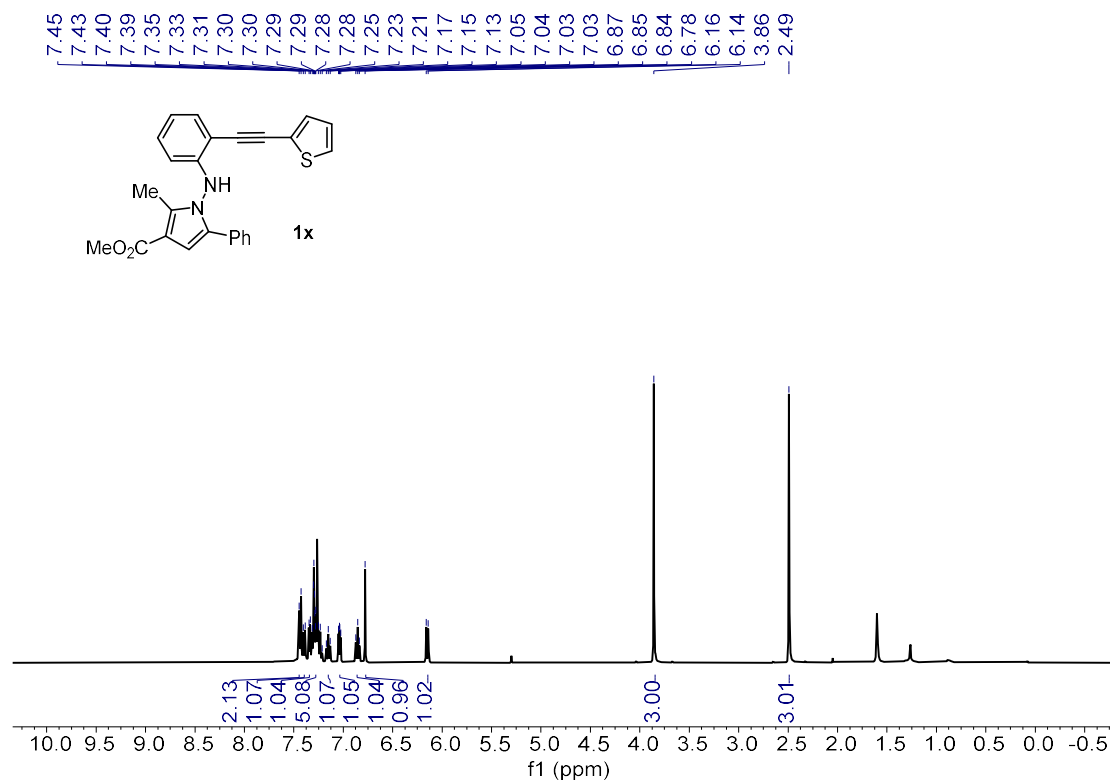

<sup>1</sup>H NMR (400 MHz, CDCl<sub>3</sub>) of **1x**

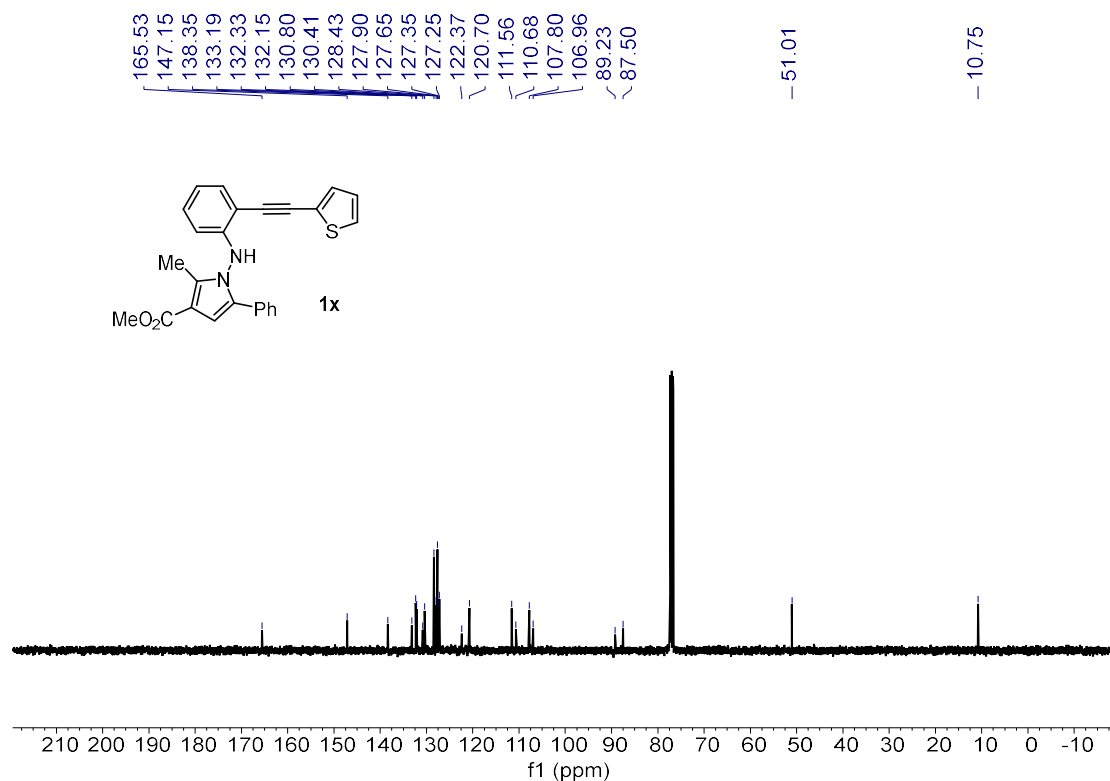

<sup>13</sup>C NMR (101 MHz, CDCl<sub>3</sub>) of **1x**

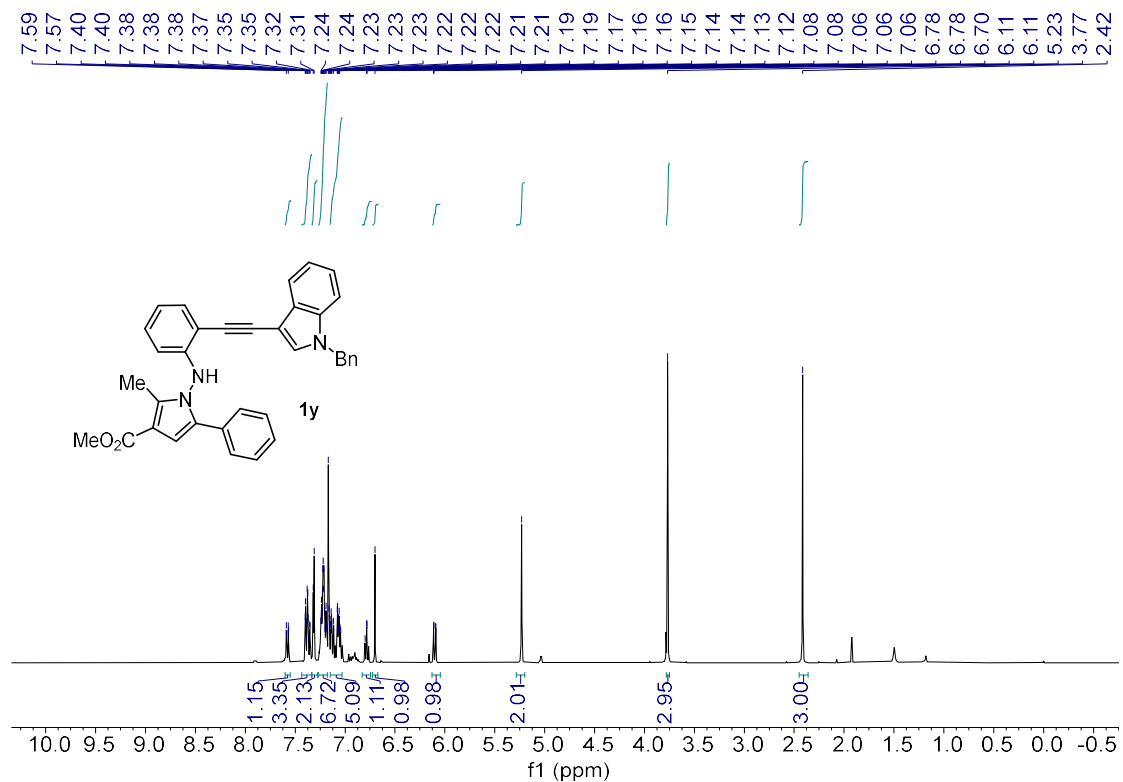

<sup>1</sup>H NMR (400 MHz, CDCl<sub>3</sub>) of **1y**

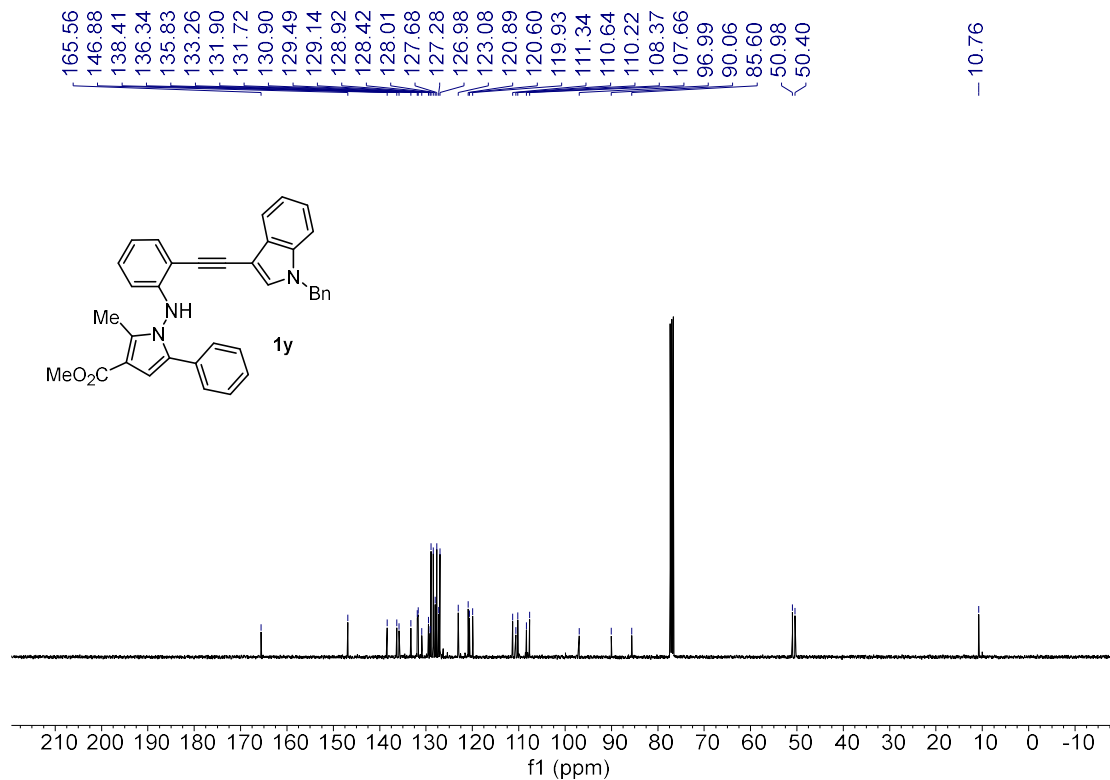

<sup>13</sup>C NMR (101 MHz, CDCl<sub>3</sub>) of **1y**



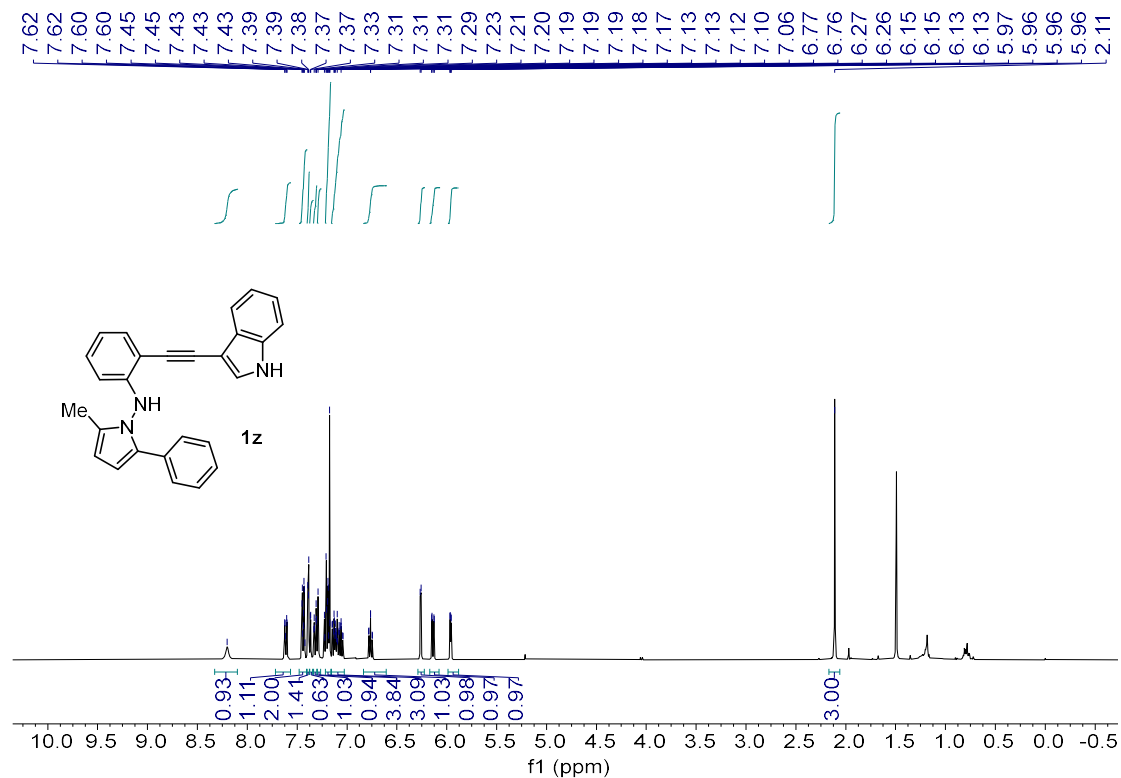

<sup>1</sup>H NMR (400 MHz, CDCl<sub>3</sub>) of **1z**

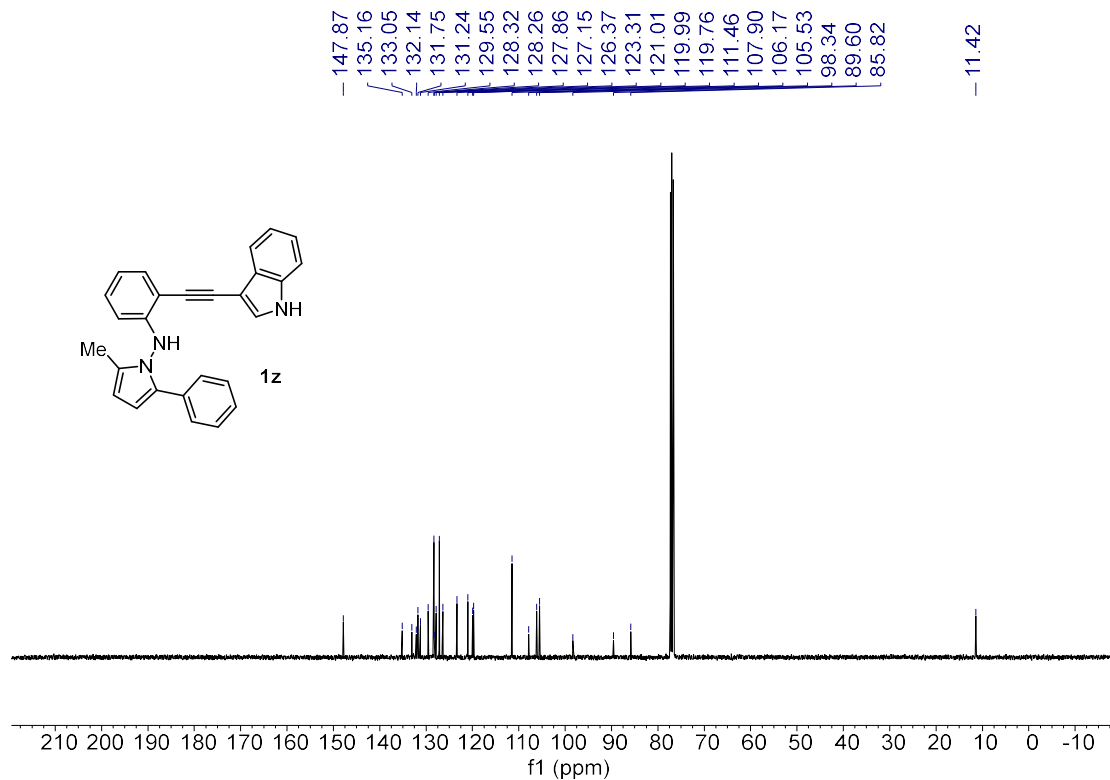

<sup>13</sup>C NMR (101 MHz, CDCl<sub>3</sub>) of **1z**

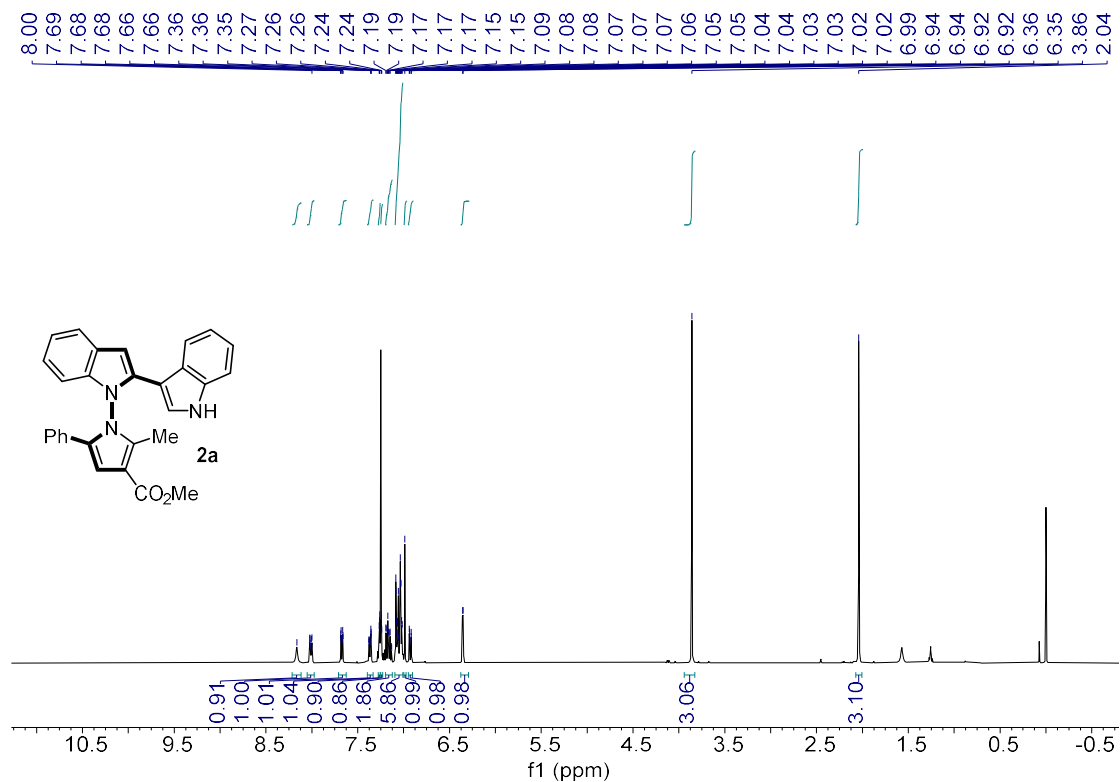

<sup>1</sup>H NMR (400 MHz, CDCl<sub>3</sub>) of **2a**

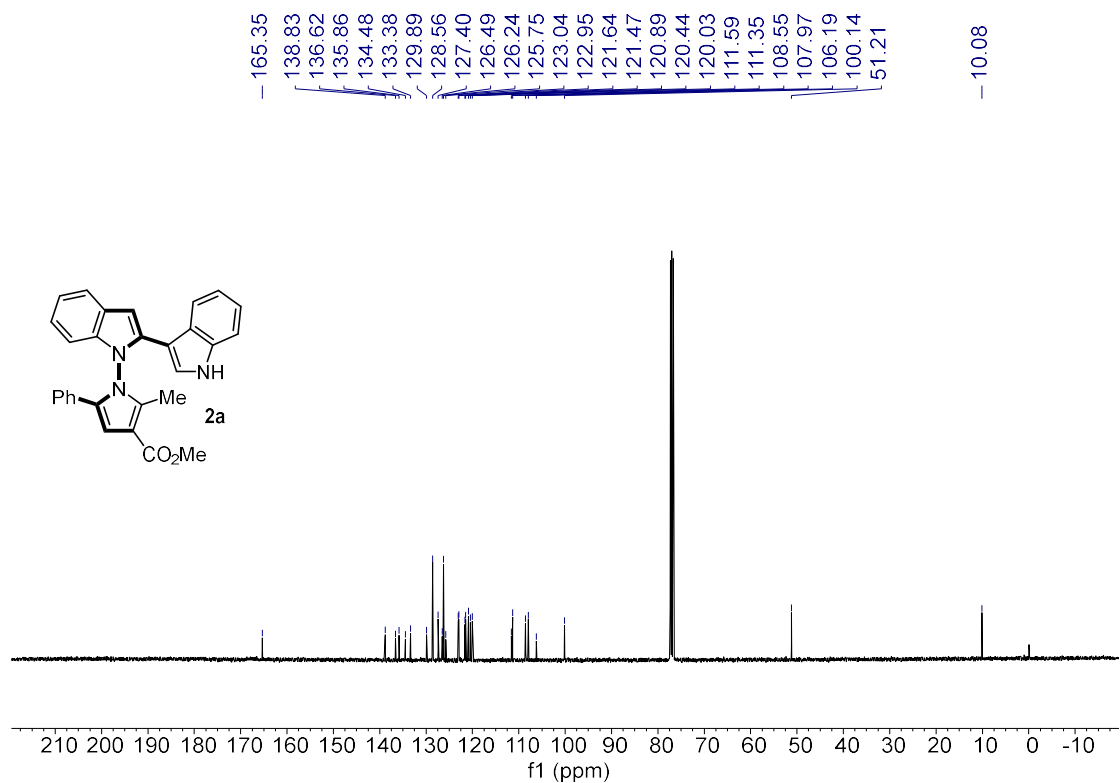

<sup>13</sup>C NMR (101 MHz, CDCl<sub>3</sub>) of **2a**

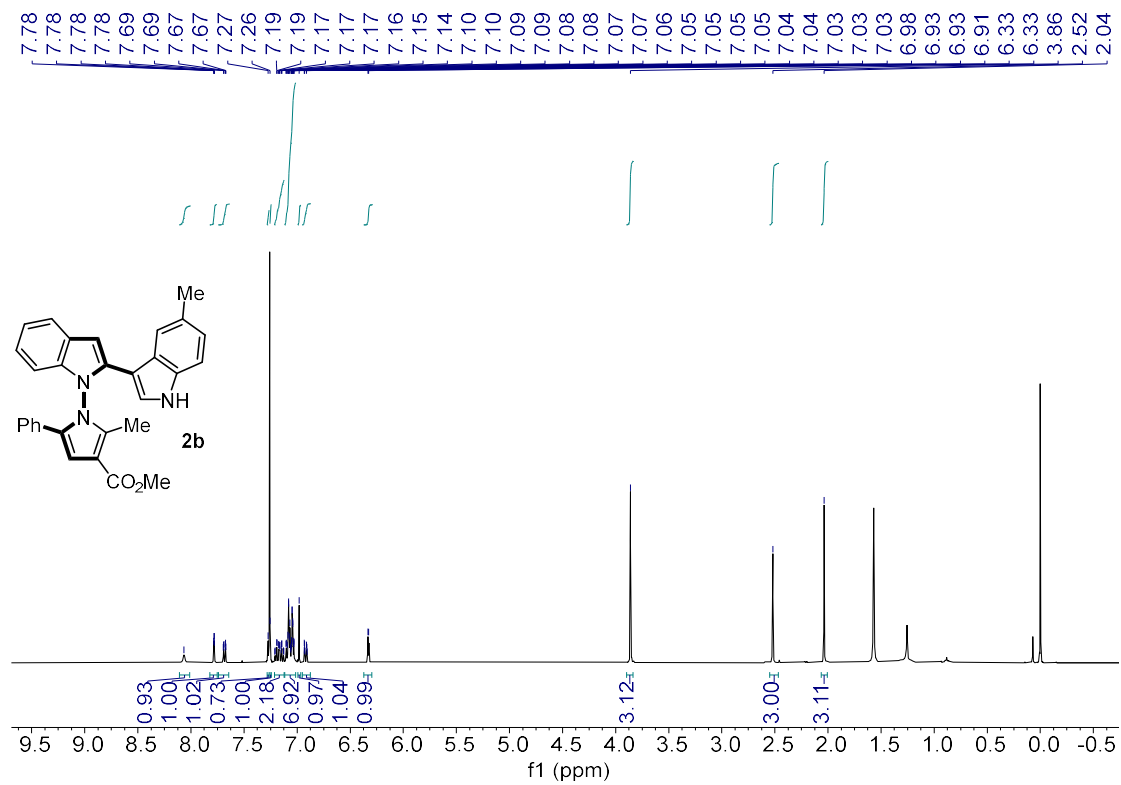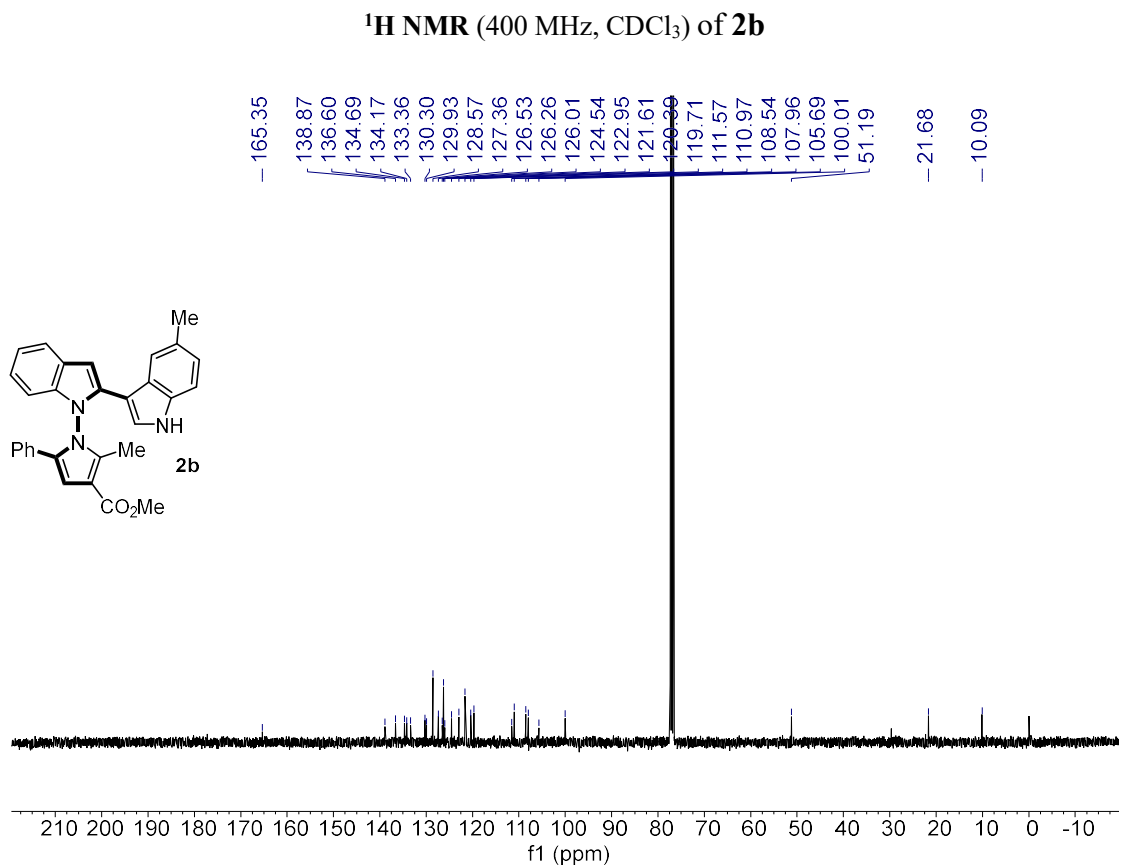

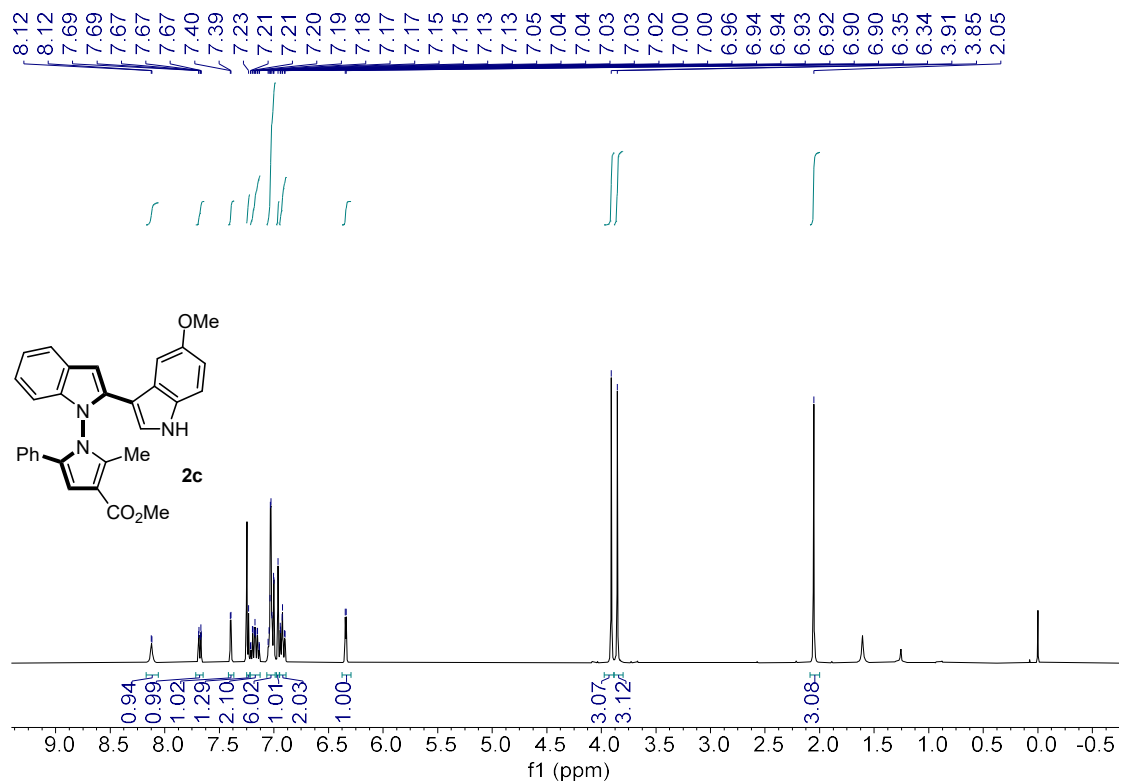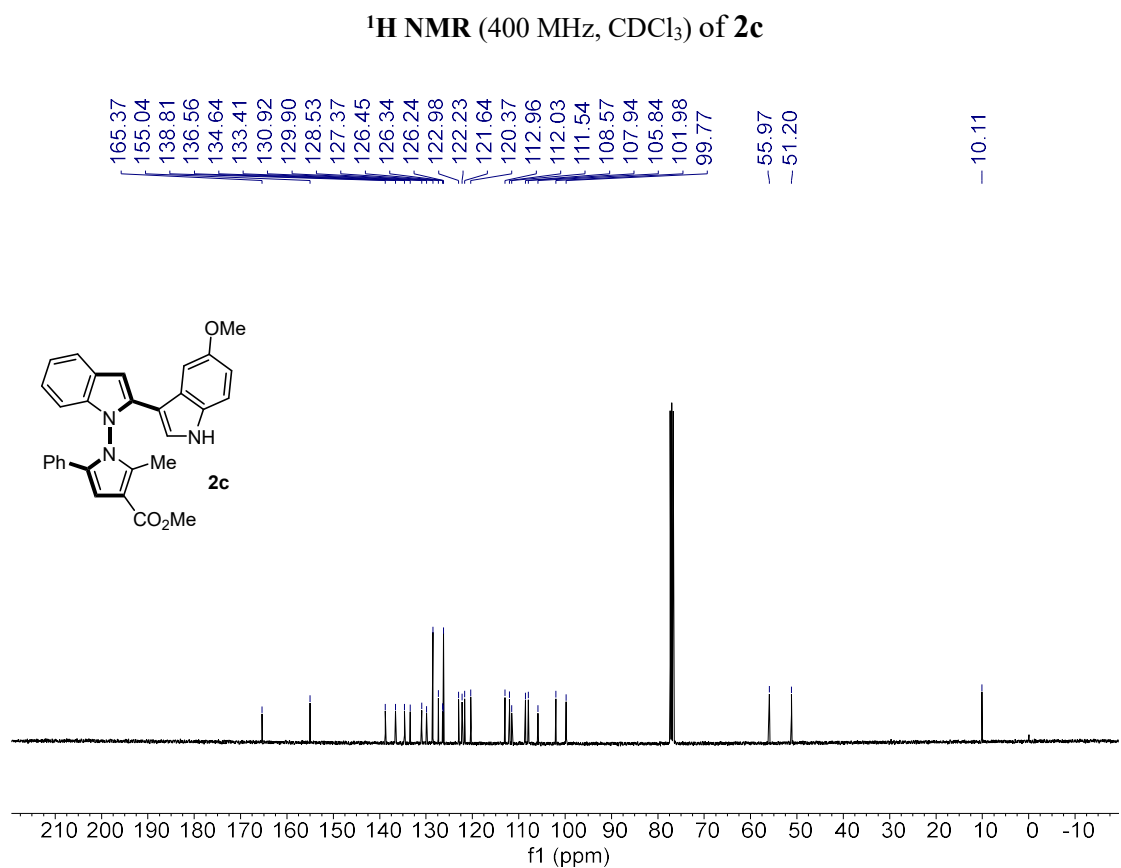

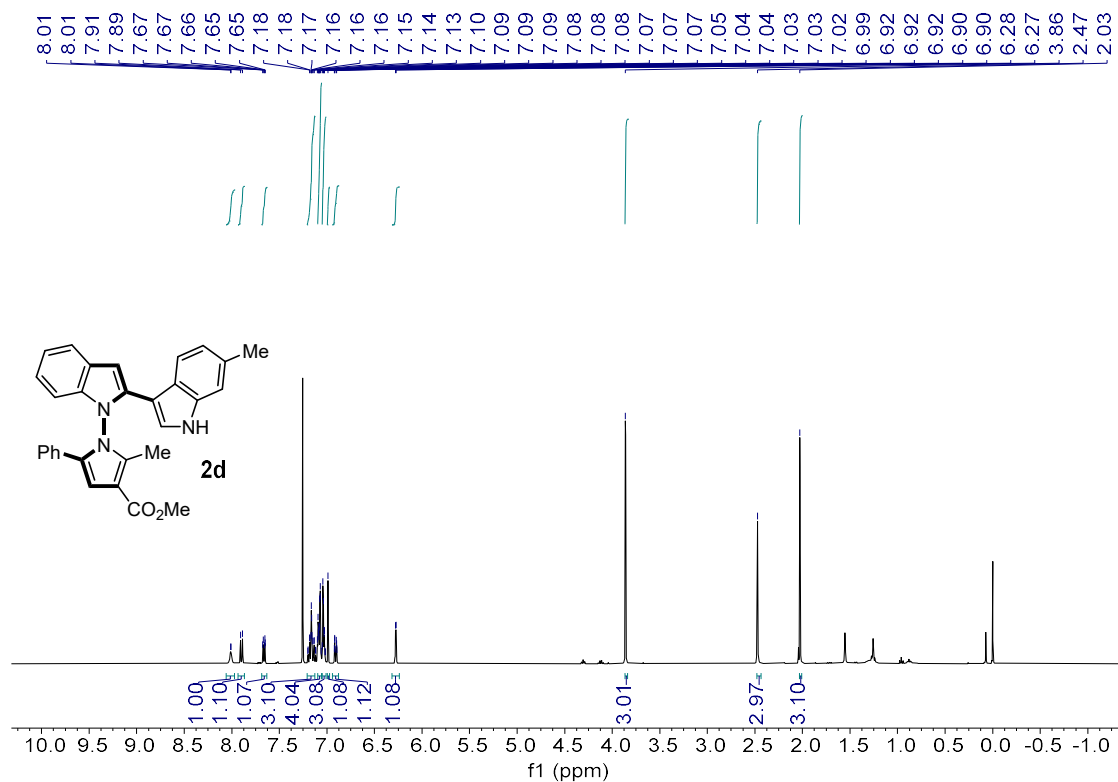

<sup>1</sup>H NMR (400 MHz, CDCl<sub>3</sub>) of **2d**

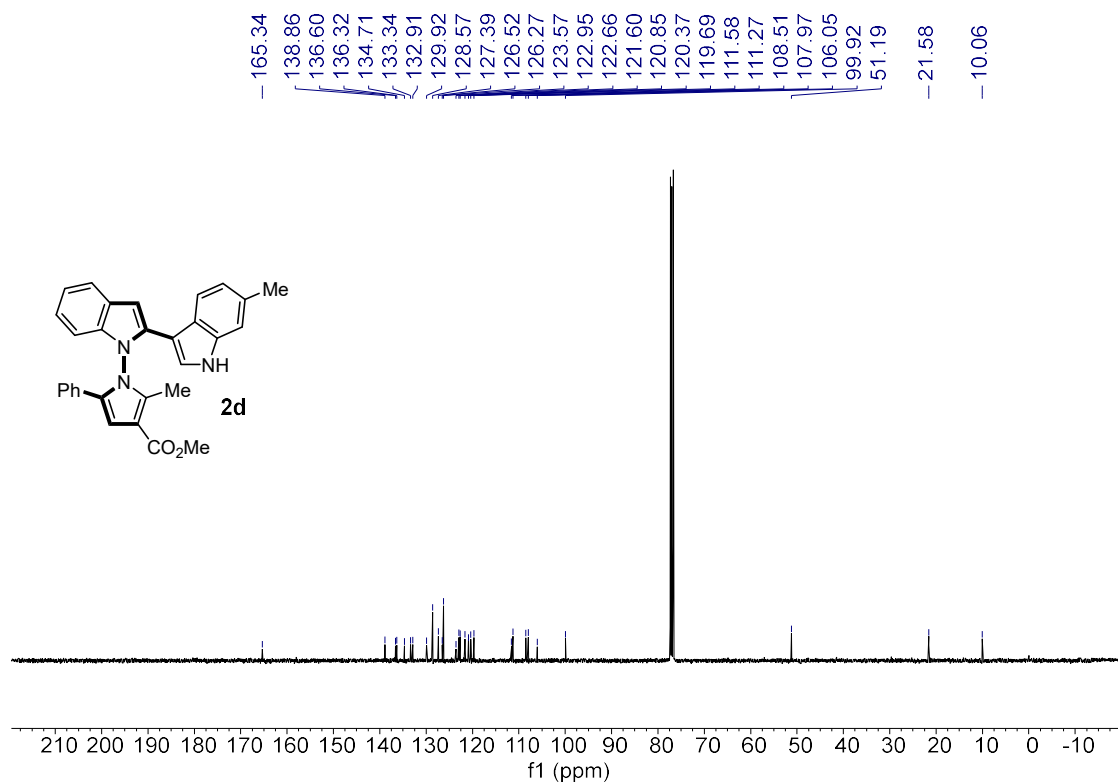

<sup>13</sup>C NMR (101 MHz, CDCl<sub>3</sub>) of **2d**

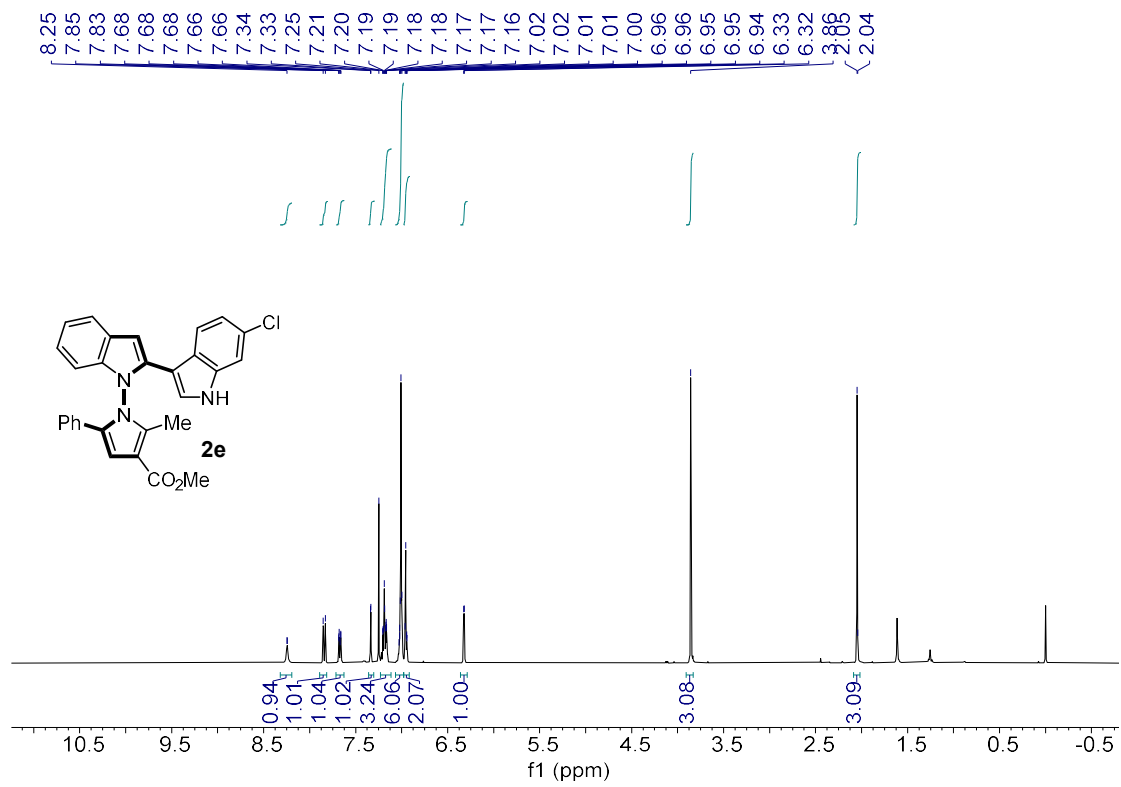

<sup>1</sup>H NMR (400 MHz, CDCl<sub>3</sub>) of **2e**

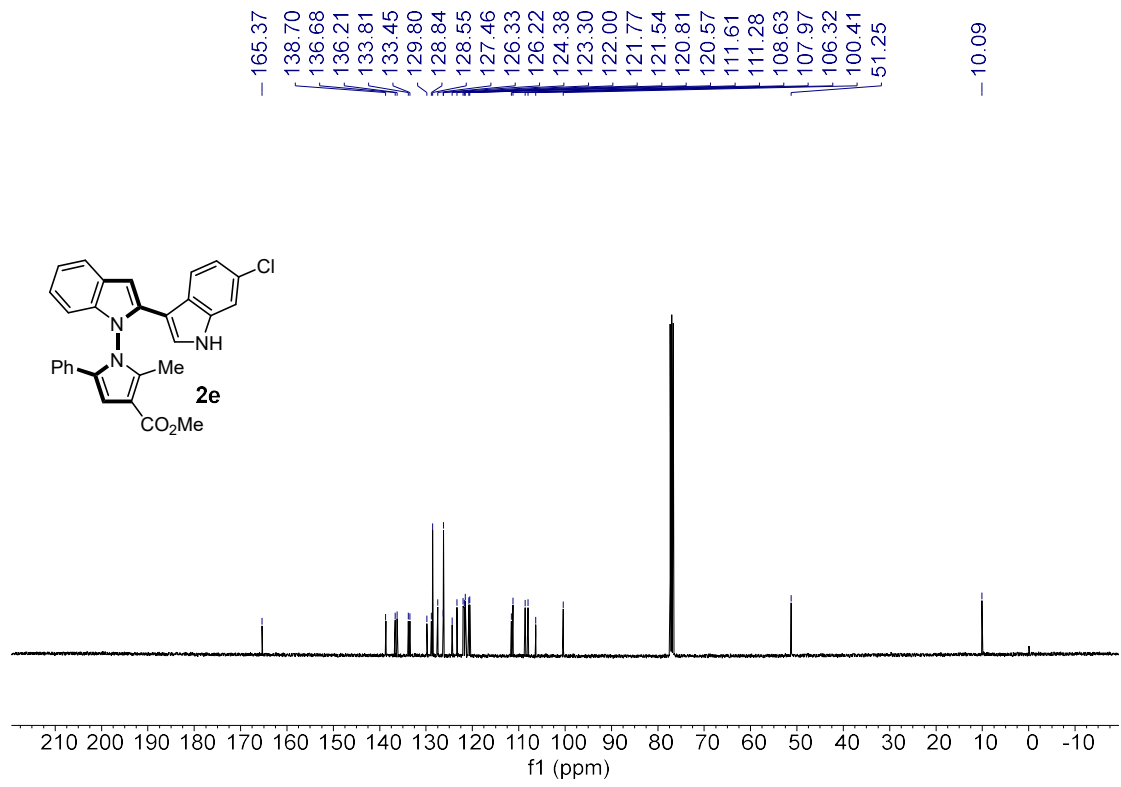

<sup>13</sup>C NMR (101 MHz, CDCl<sub>3</sub>) of **2e**

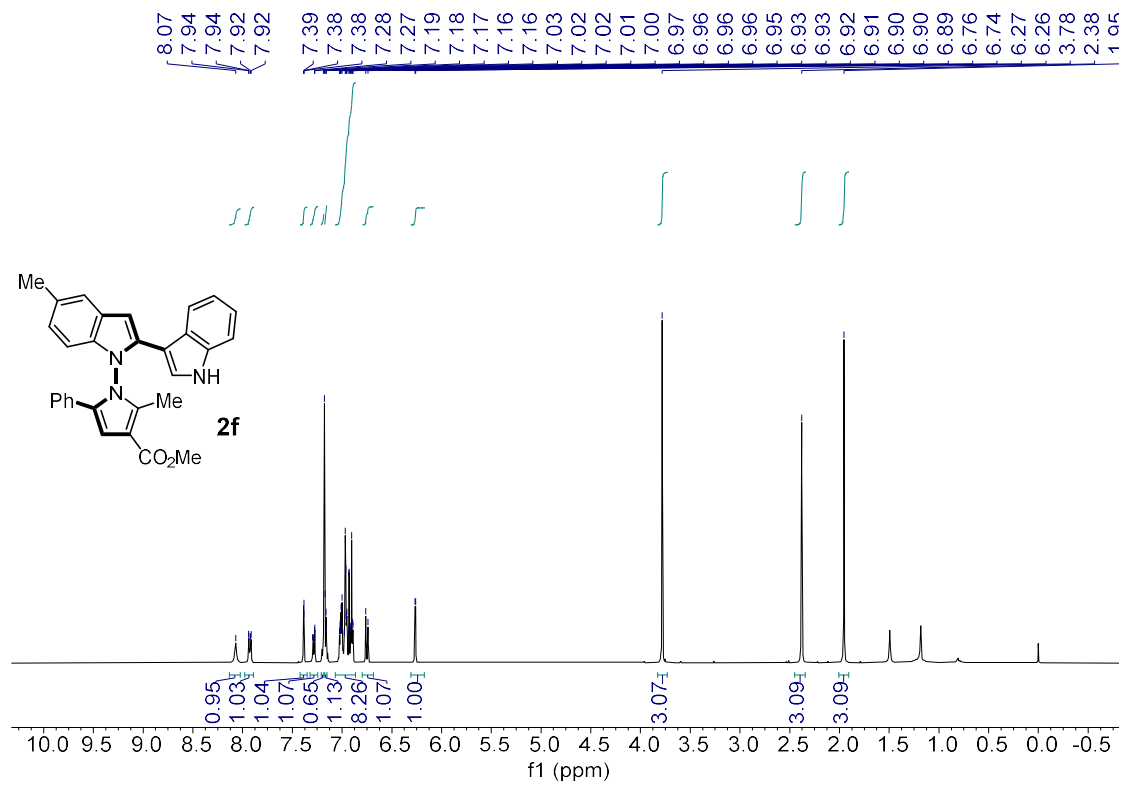

<sup>1</sup>H NMR (400 MHz, CDCl<sub>3</sub>) of **2f**

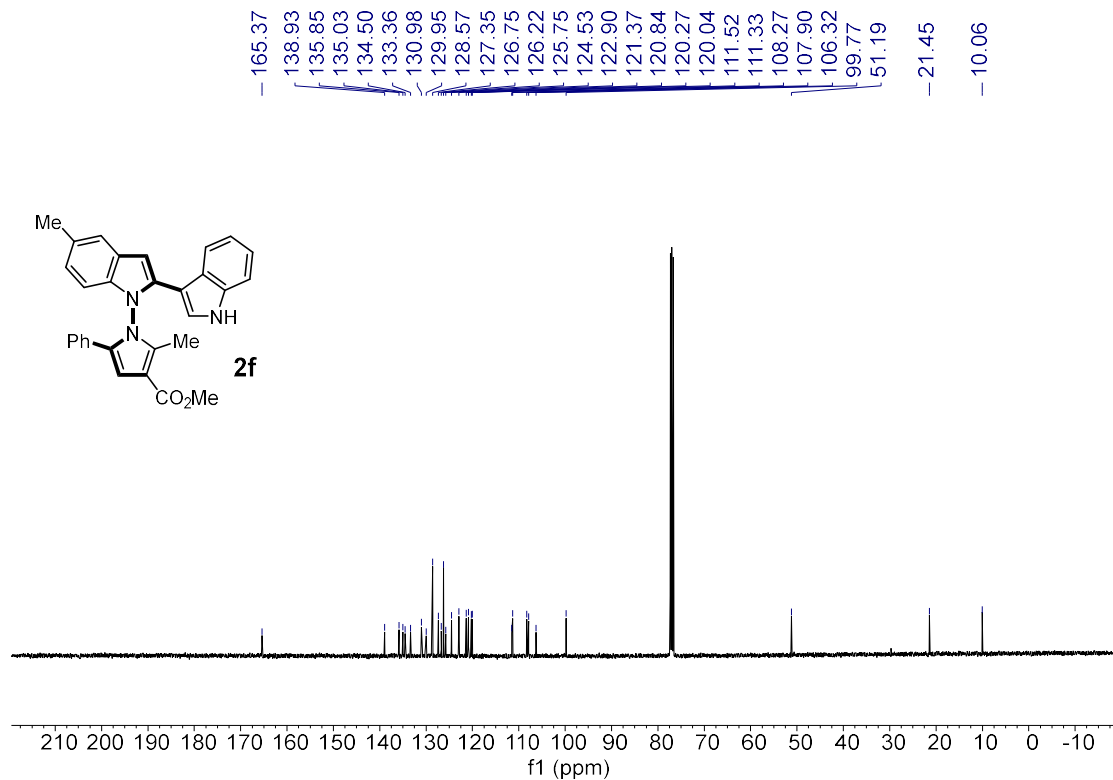

<sup>13</sup>C NMR (101 MHz, CDCl<sub>3</sub>) of **2f**

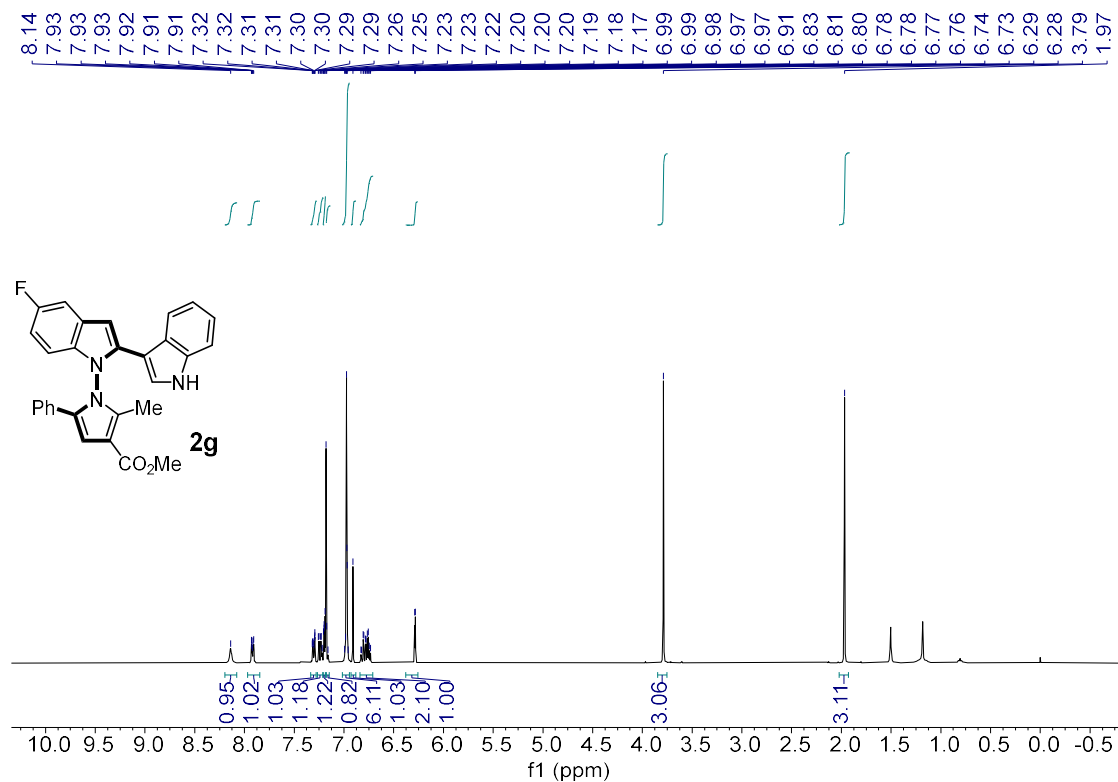

**<sup>1</sup>H NMR (400 MHz, CDCl<sub>3</sub>) of 2g**

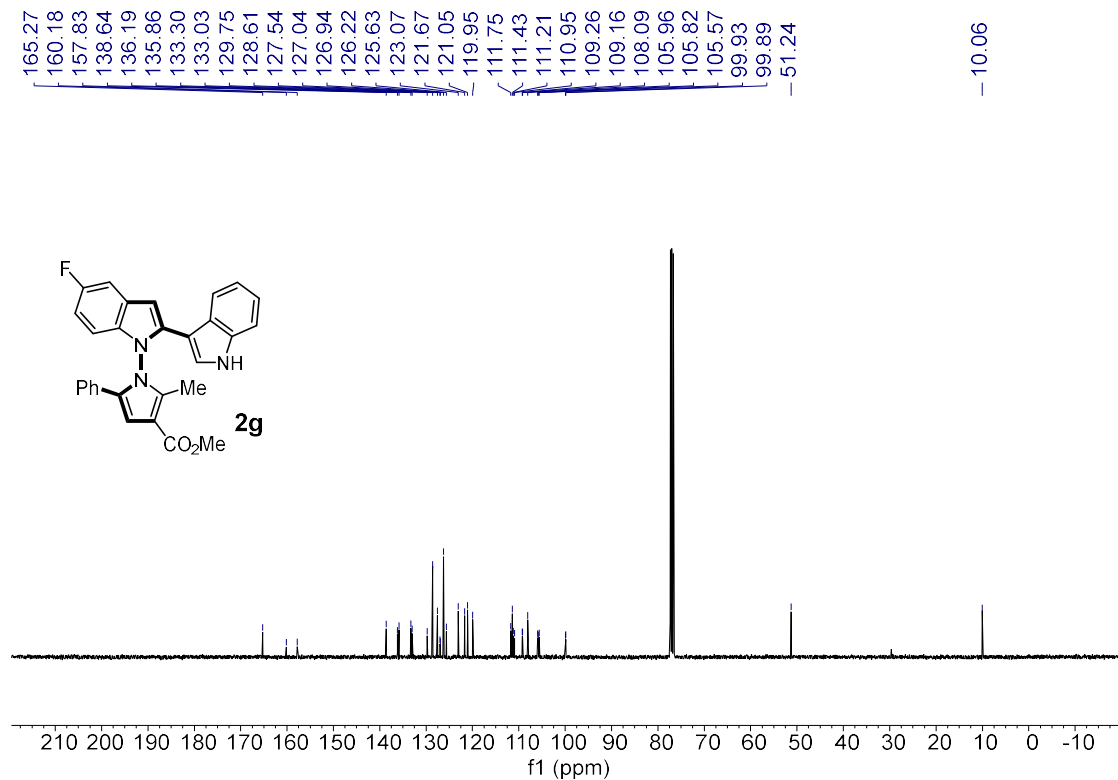

**<sup>13</sup>C NMR (101 MHz, CDCl<sub>3</sub>) of 2g**



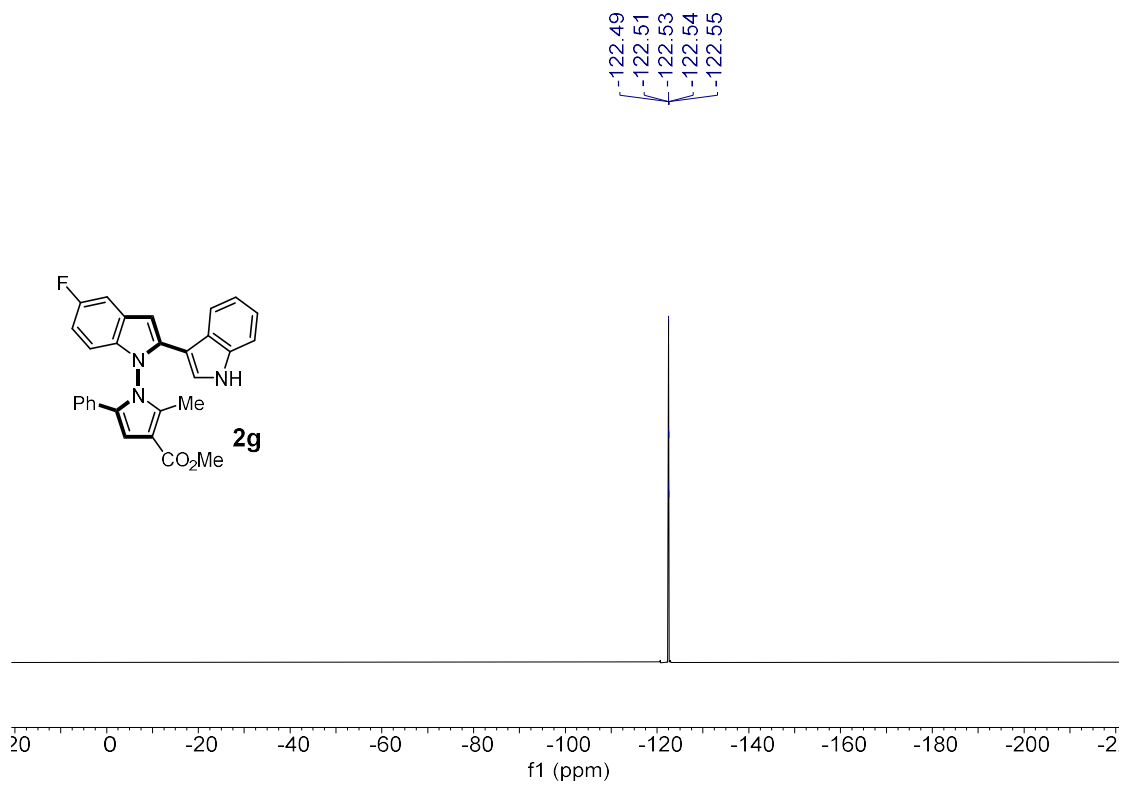

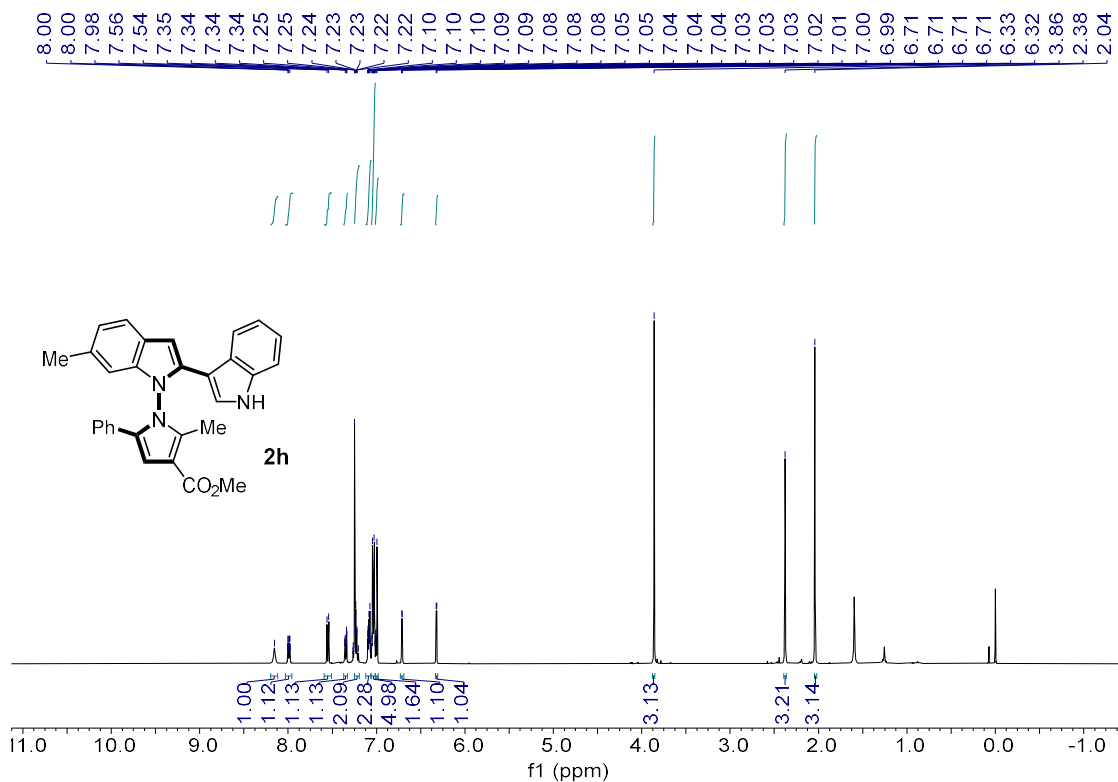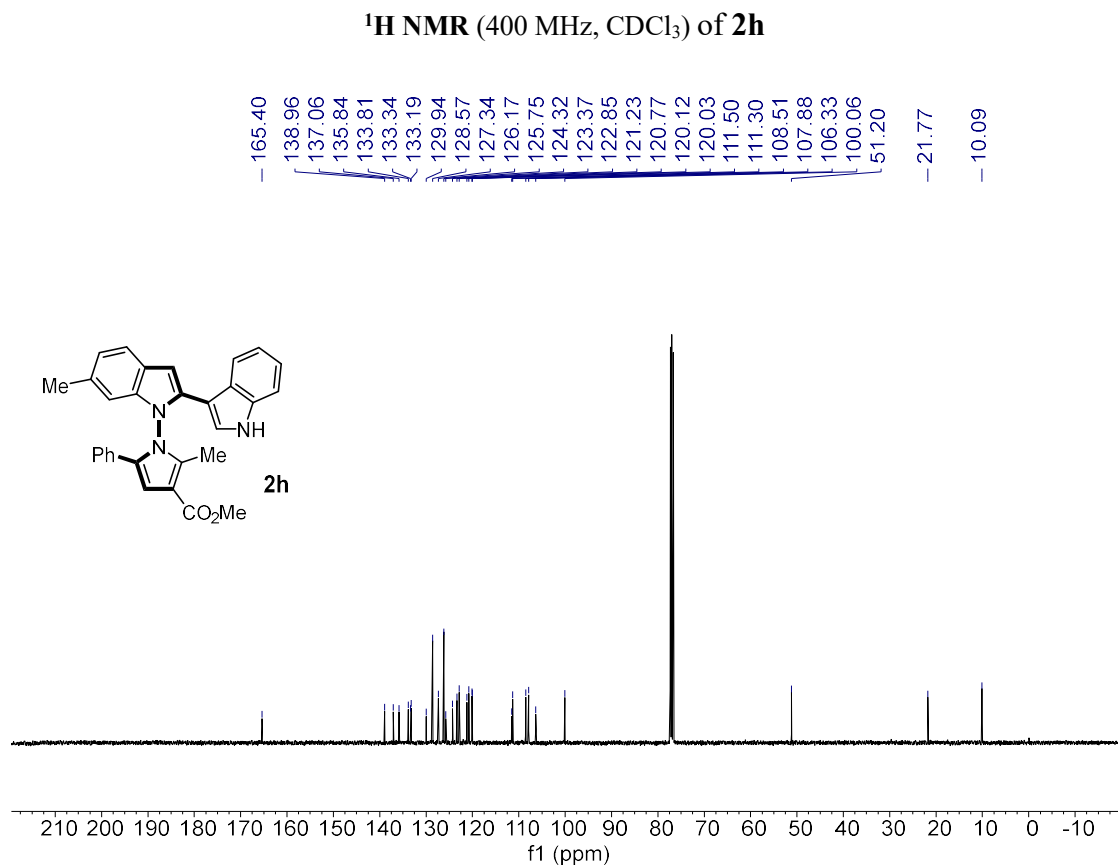

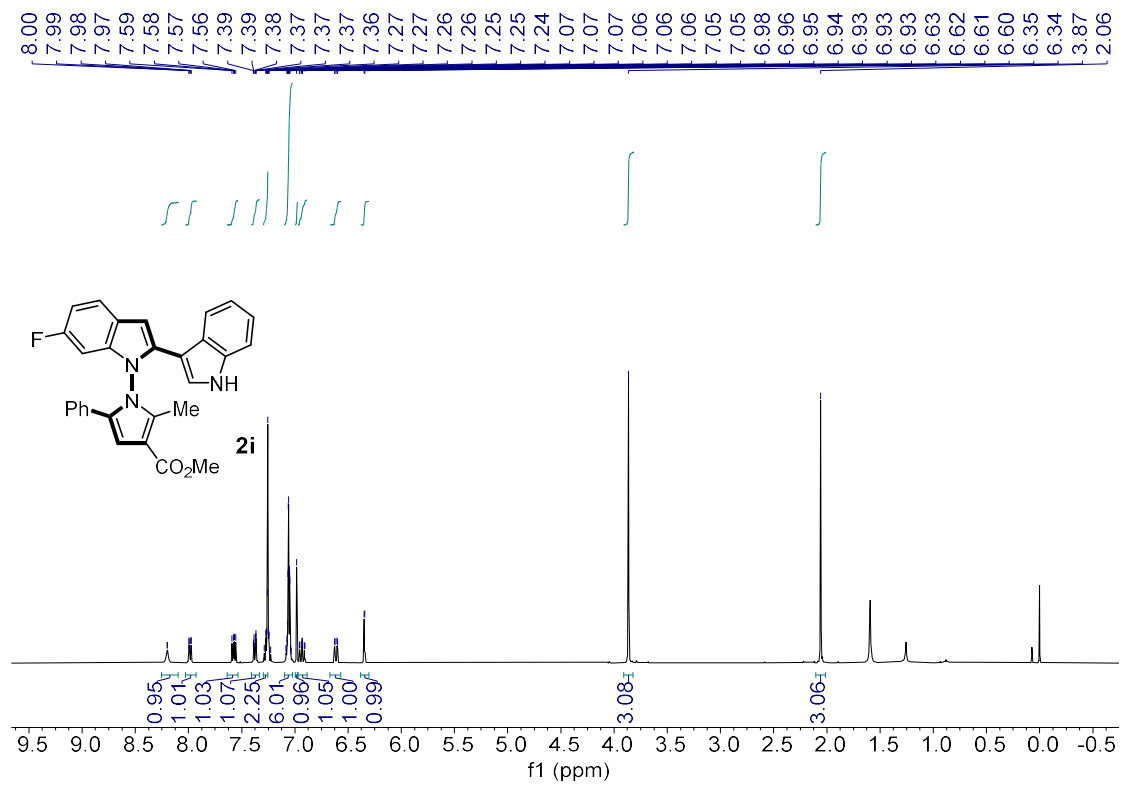

<sup>1</sup>H NMR (400 MHz, CDCl<sub>3</sub>) of **2i**

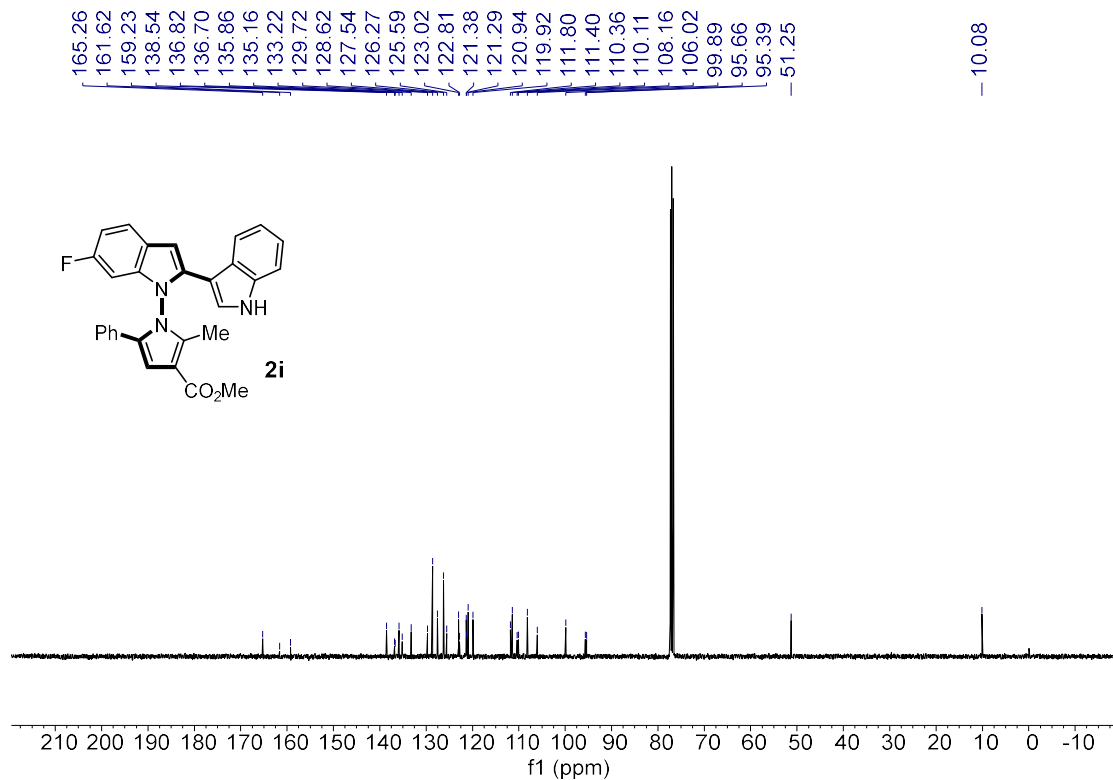

<sup>13</sup>C NMR (101 MHz, CDCl<sub>3</sub>) of **2i**

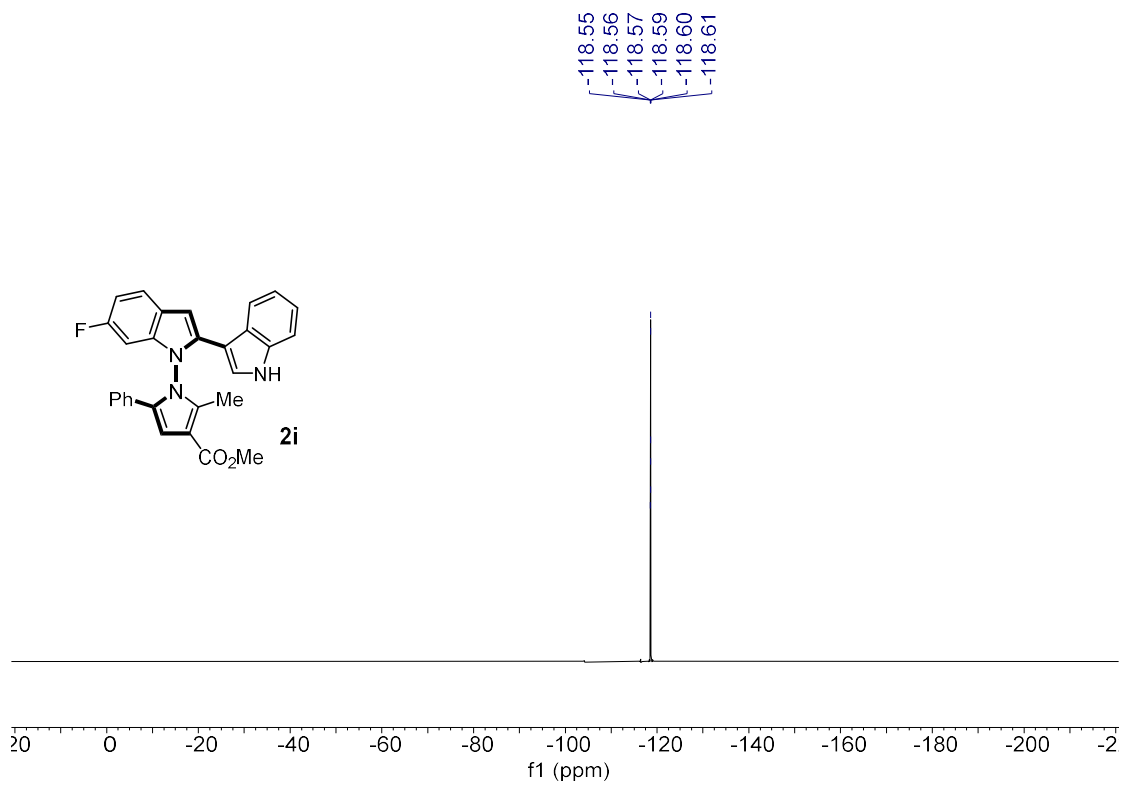

$^{19}\text{F}$  NMR (376 MHz,  $\text{CDCl}_3$ ) of **2i**

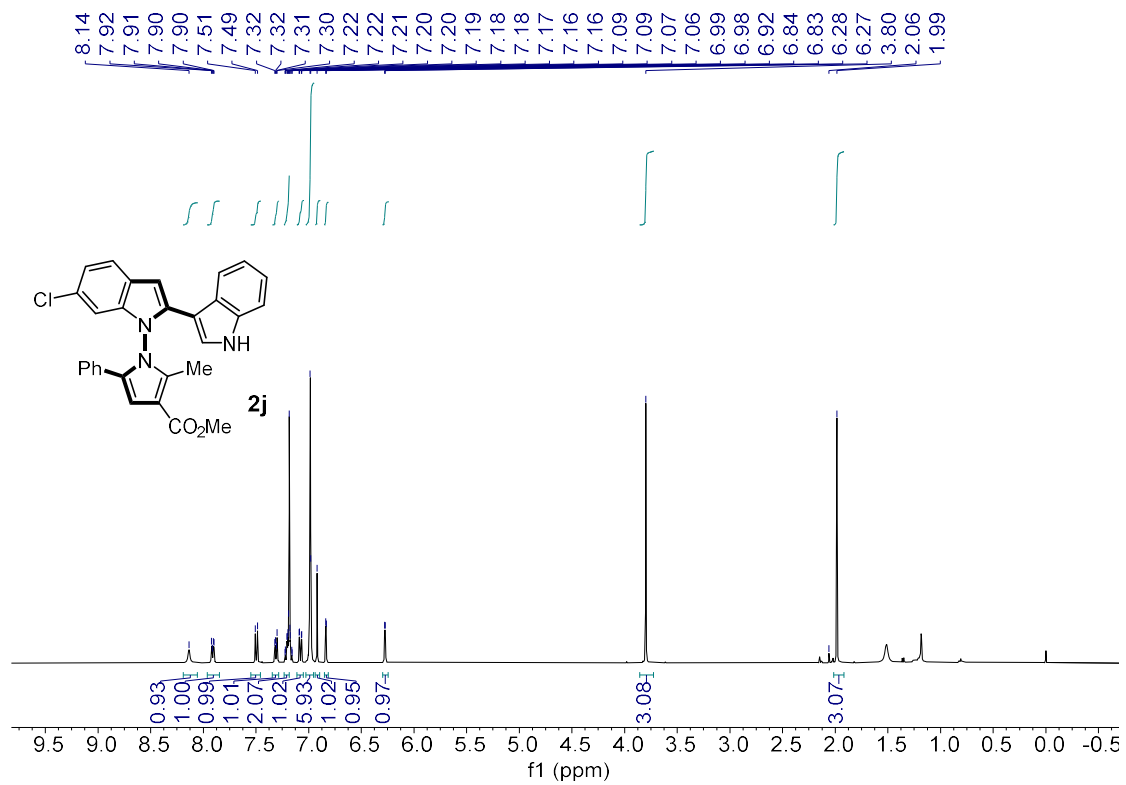

<sup>1</sup>H NMR (400 MHz, CDCl<sub>3</sub>) of **2j**

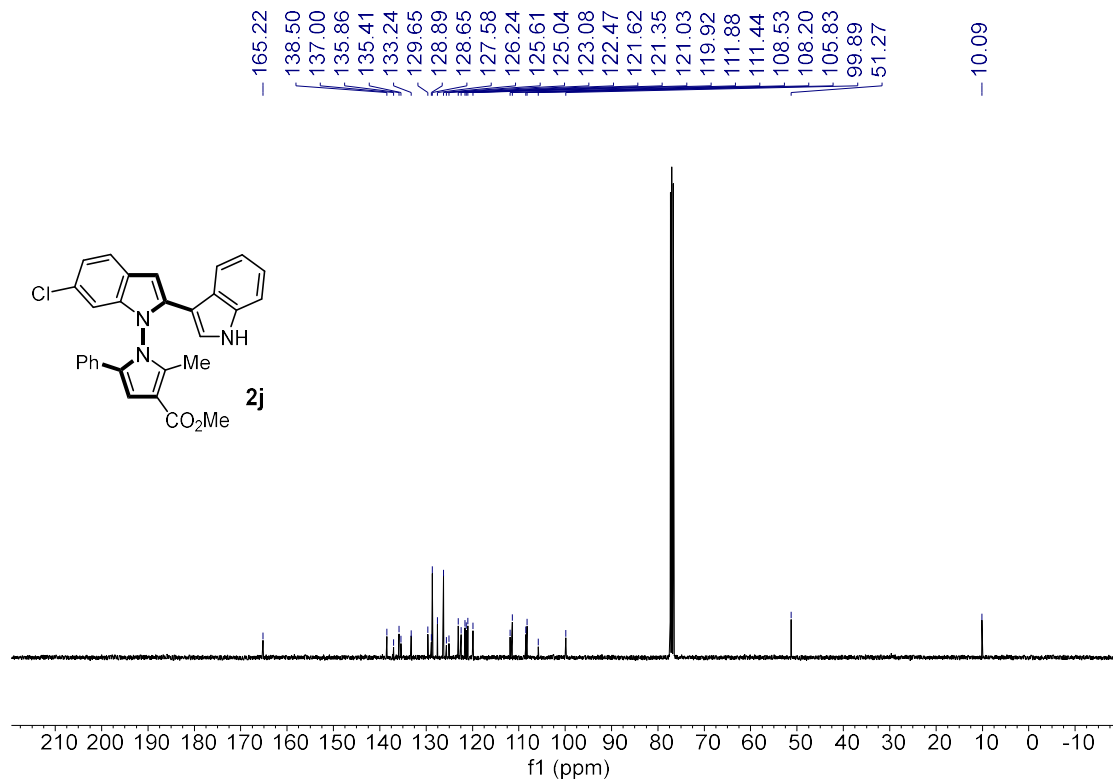

<sup>13</sup>C NMR (101 MHz, CDCl<sub>3</sub>) of **2j**

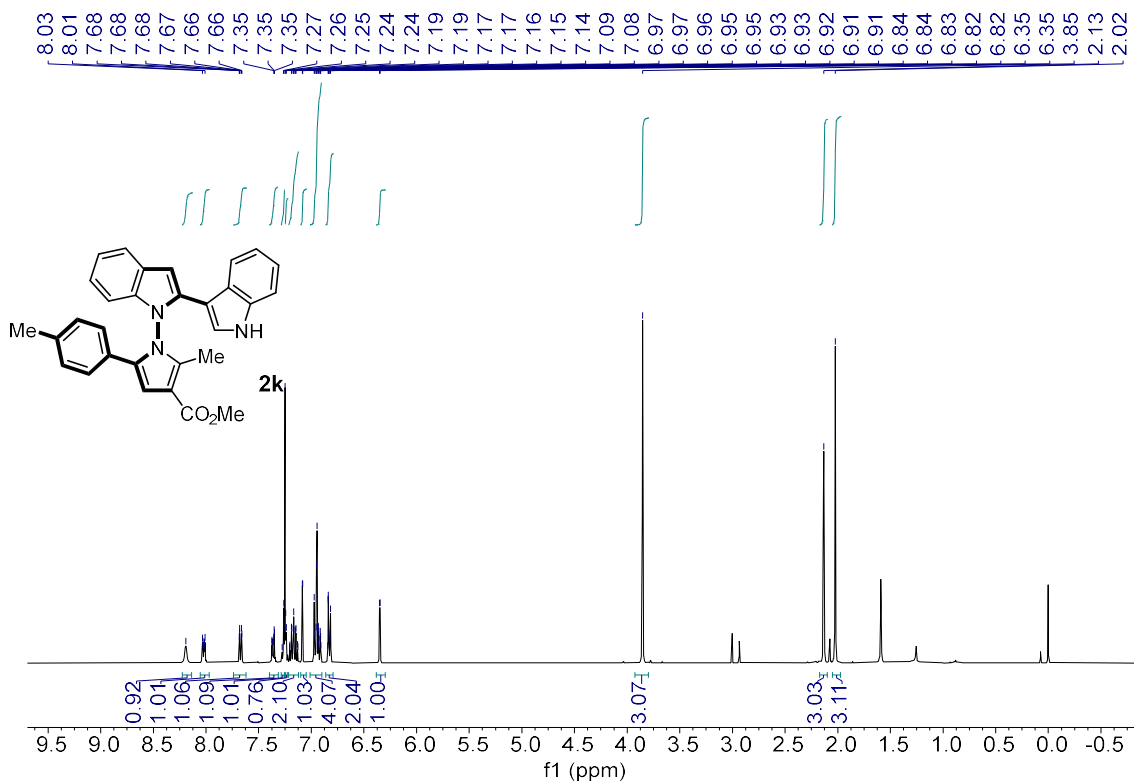

<sup>1</sup>H NMR (400 MHz, CDCl<sub>3</sub>) of **2k**

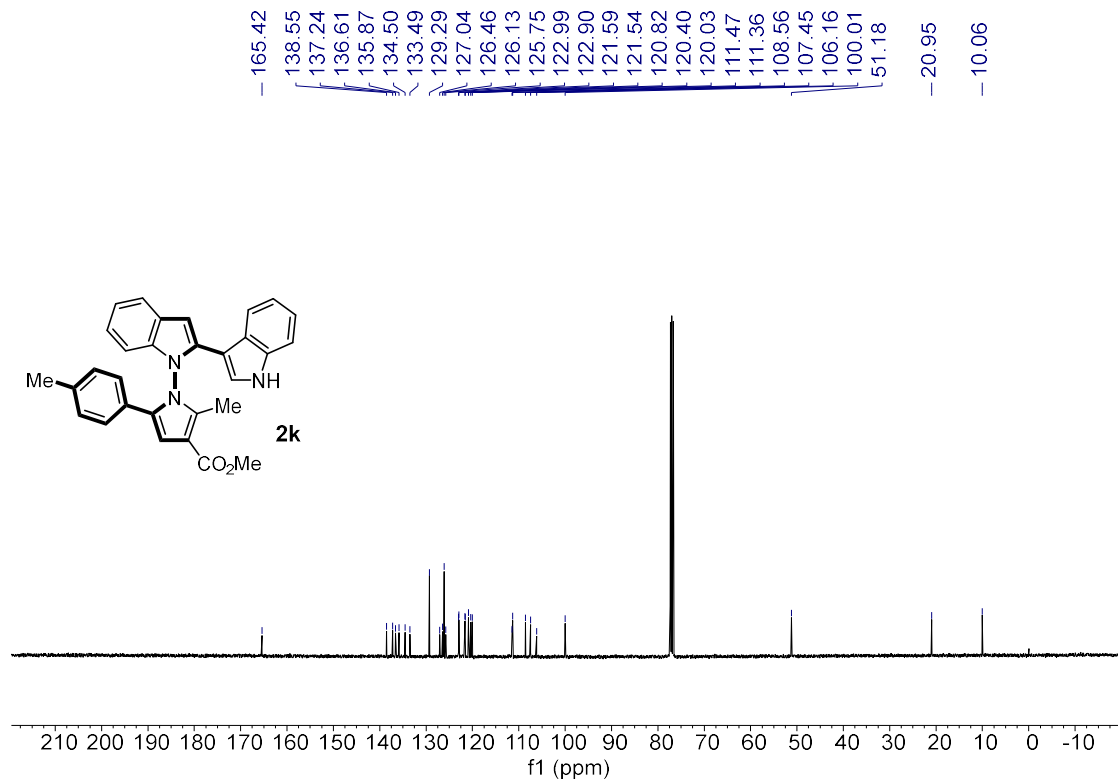

<sup>13</sup>C NMR (101 MHz, CDCl<sub>3</sub>) of **2k**

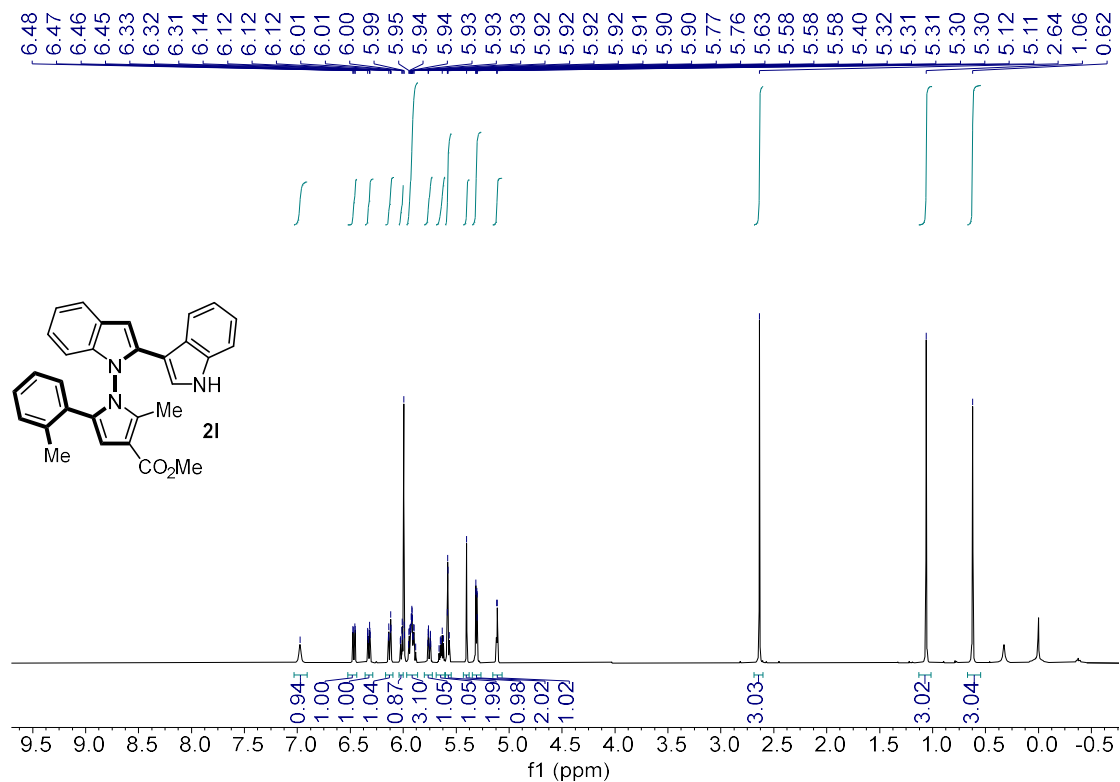

<sup>1</sup>H NMR (400 MHz, CDCl<sub>3</sub>) of **2I**

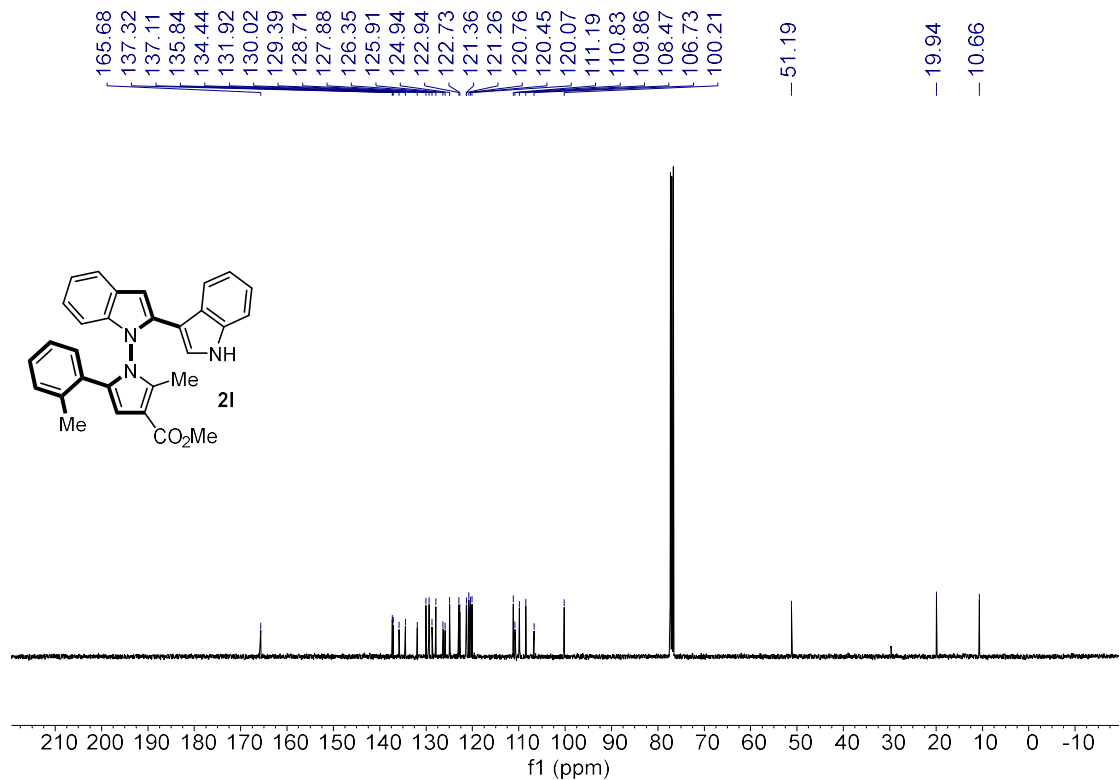

<sup>13</sup>C NMR (101 MHz, CDCl<sub>3</sub>) of **2I**

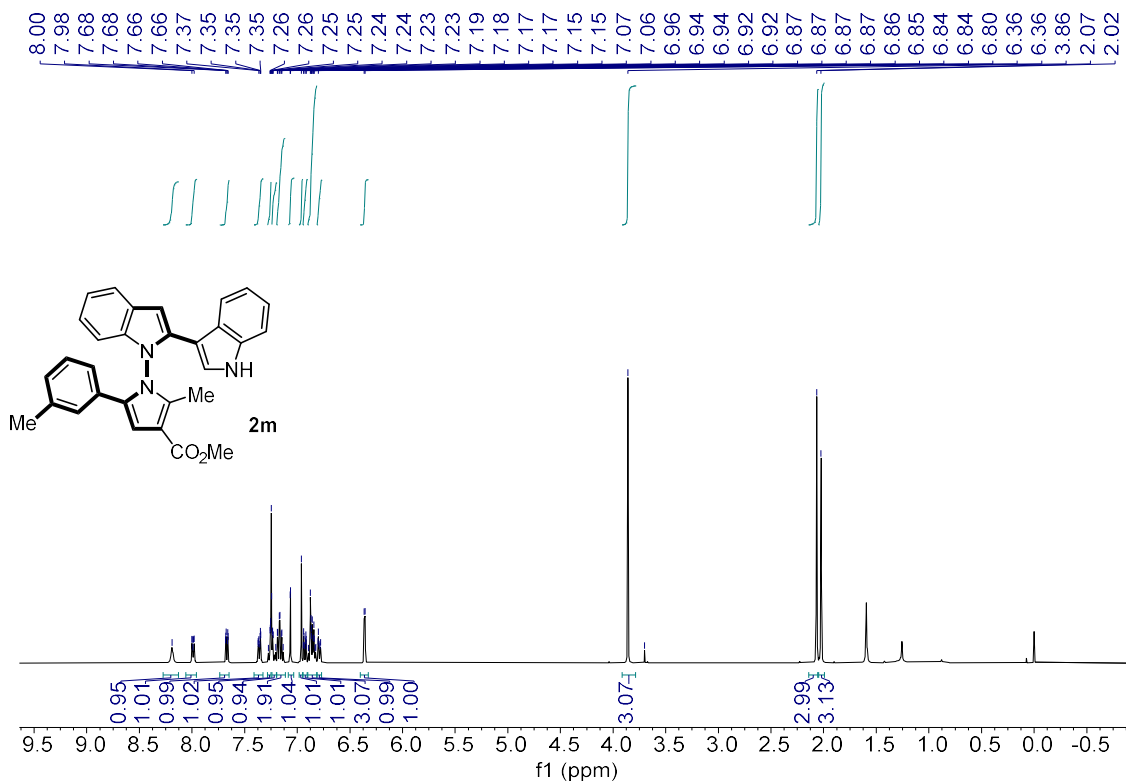

<sup>1</sup>H NMR (400 MHz, CDCl<sub>3</sub>) of **2m**

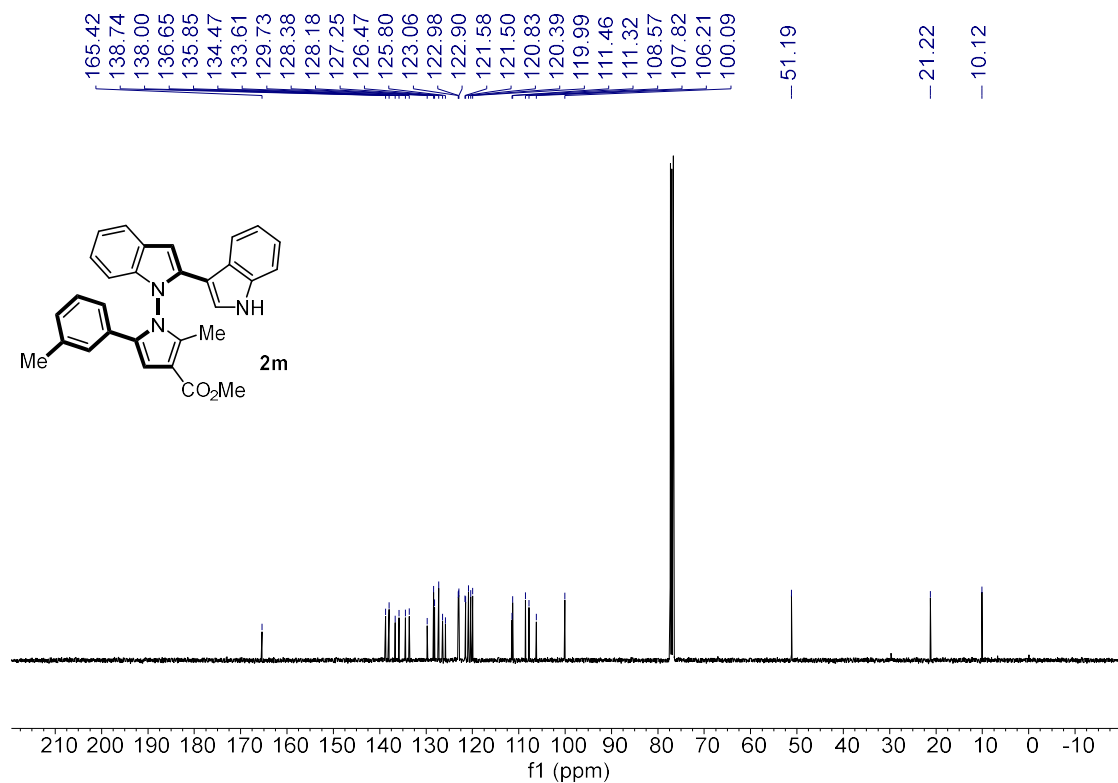

<sup>13</sup>C NMR (101 MHz, CDCl<sub>3</sub>) of **2m**



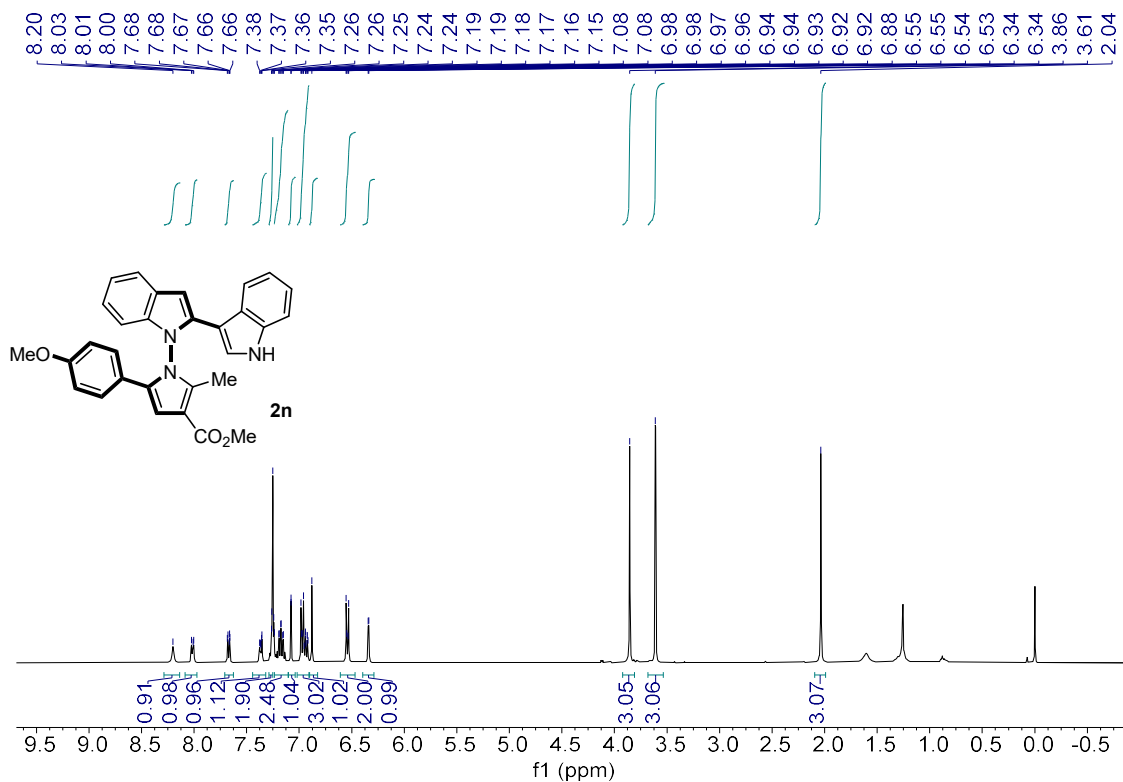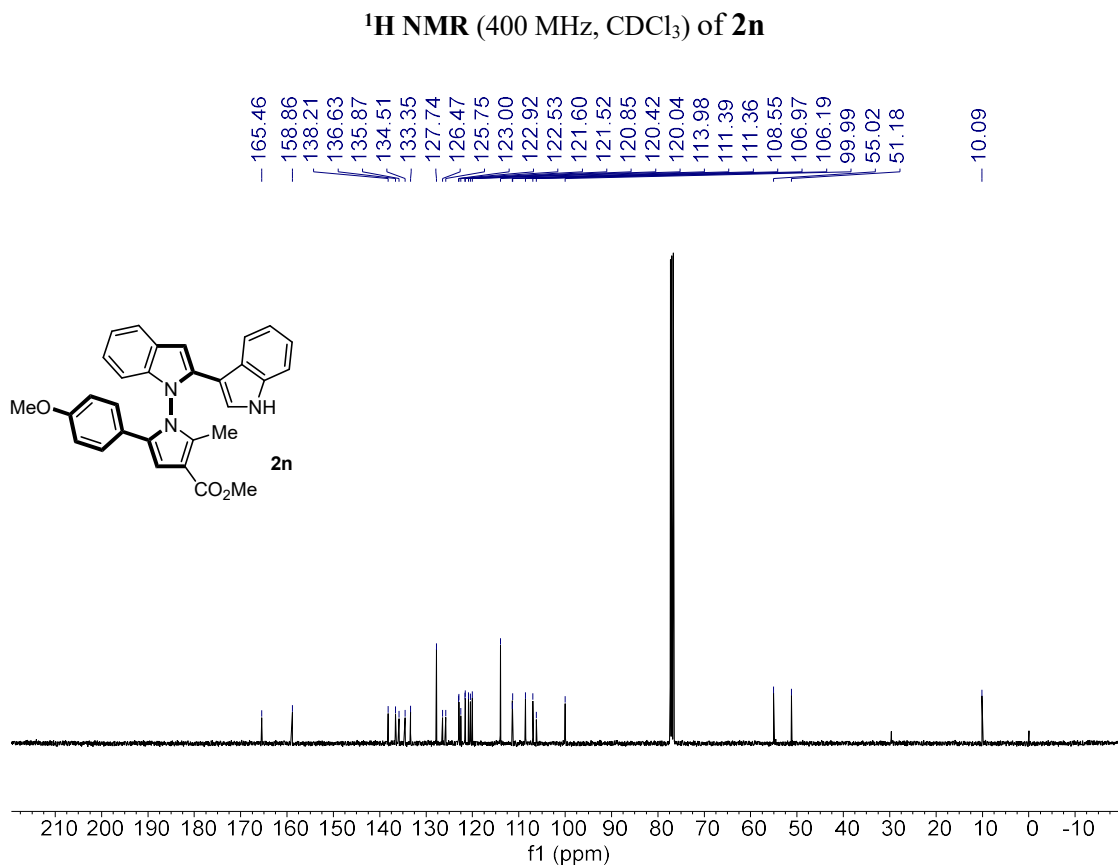

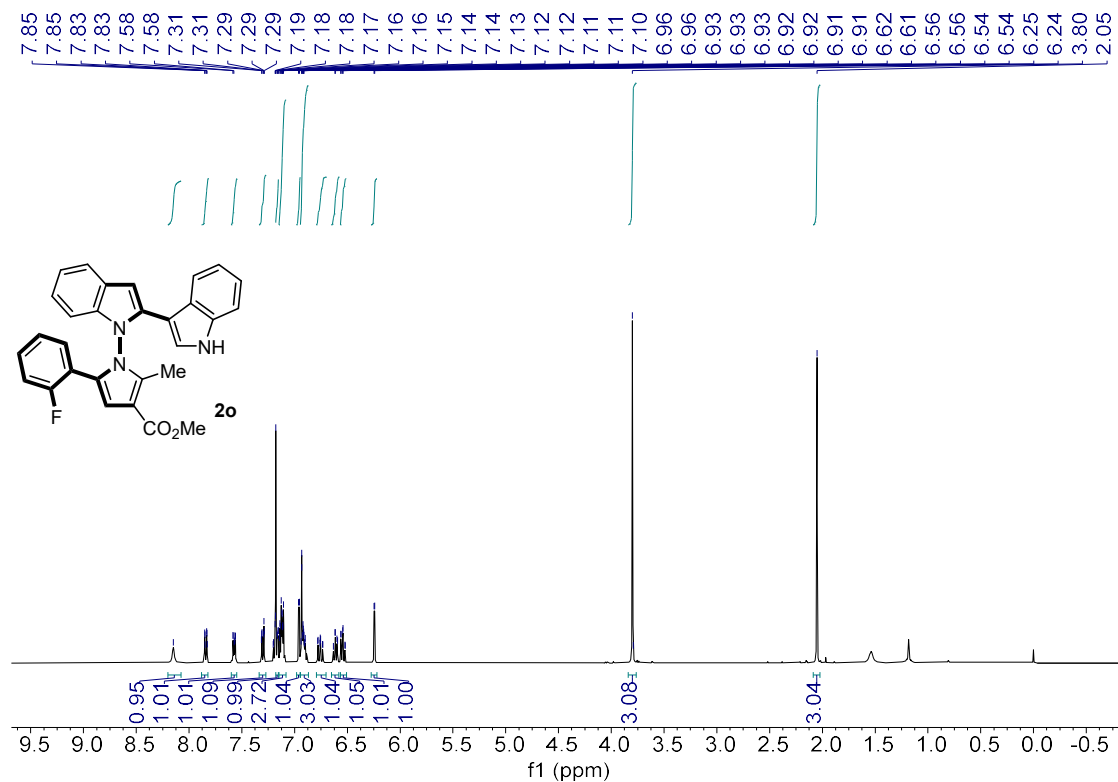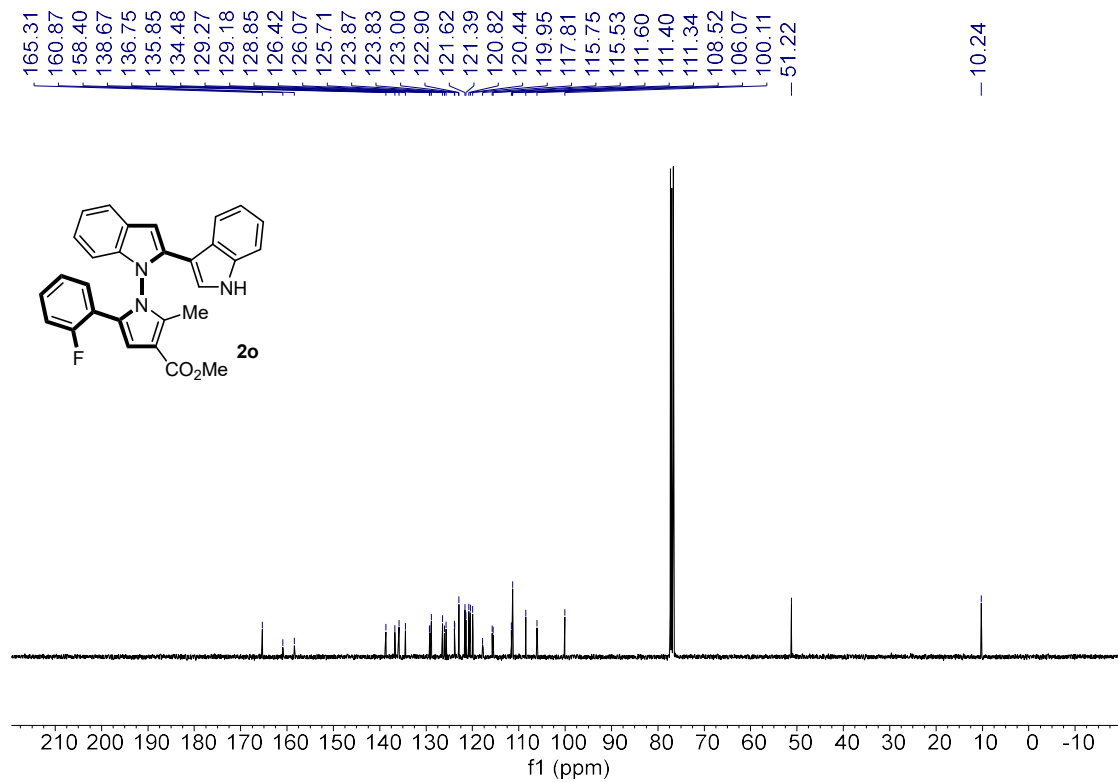

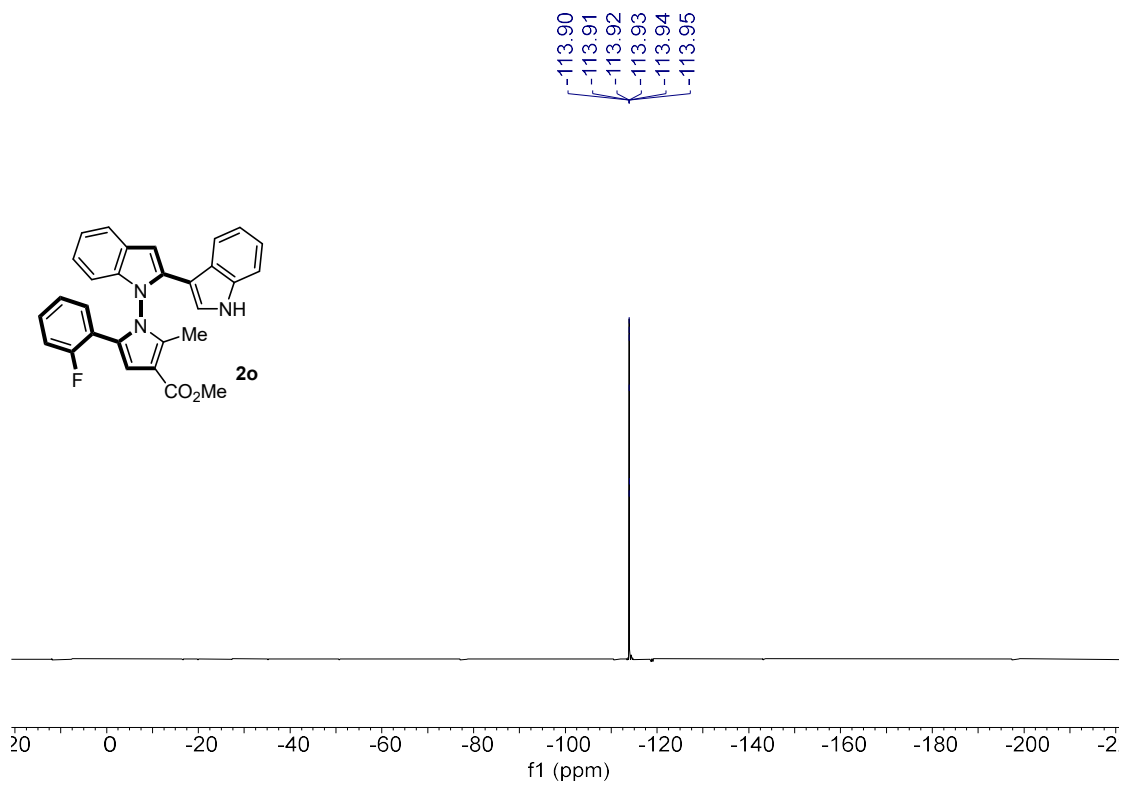

**<sup>19</sup>F NMR (376 MHz, CDCl<sub>3</sub>) of 2o**

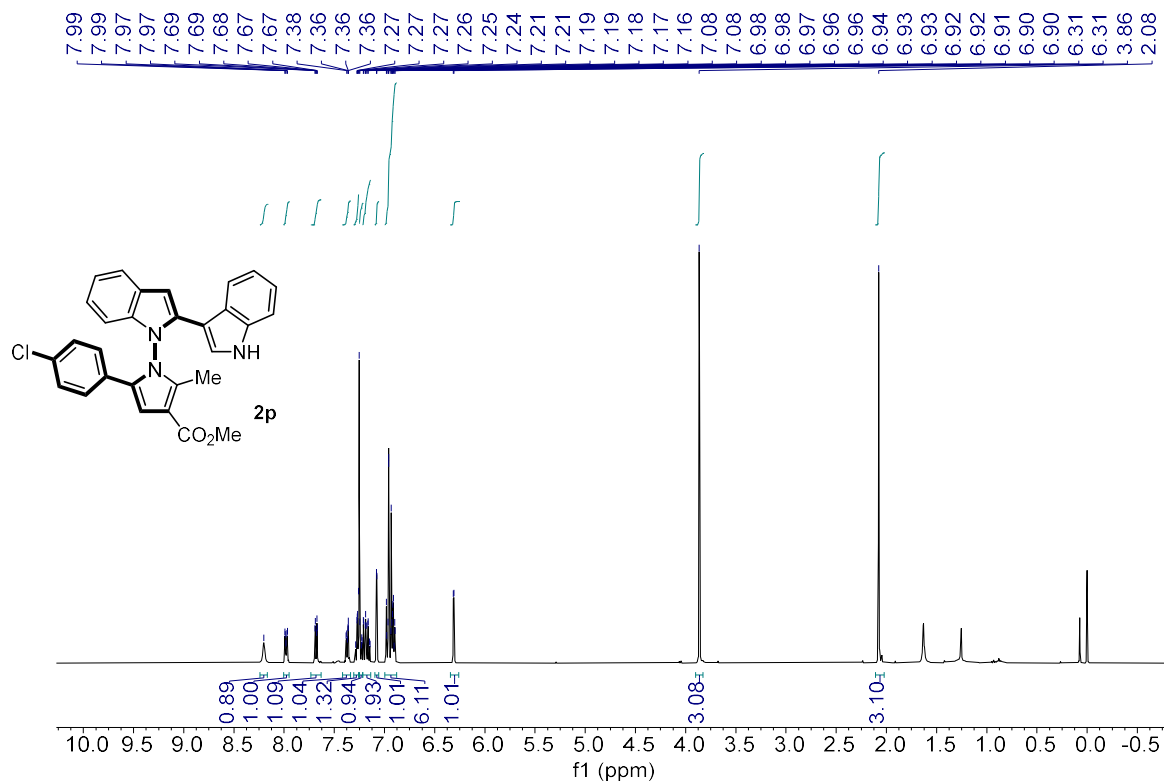

<sup>1</sup>H NMR (400 MHz, CDCl<sub>3</sub>) of **2p**

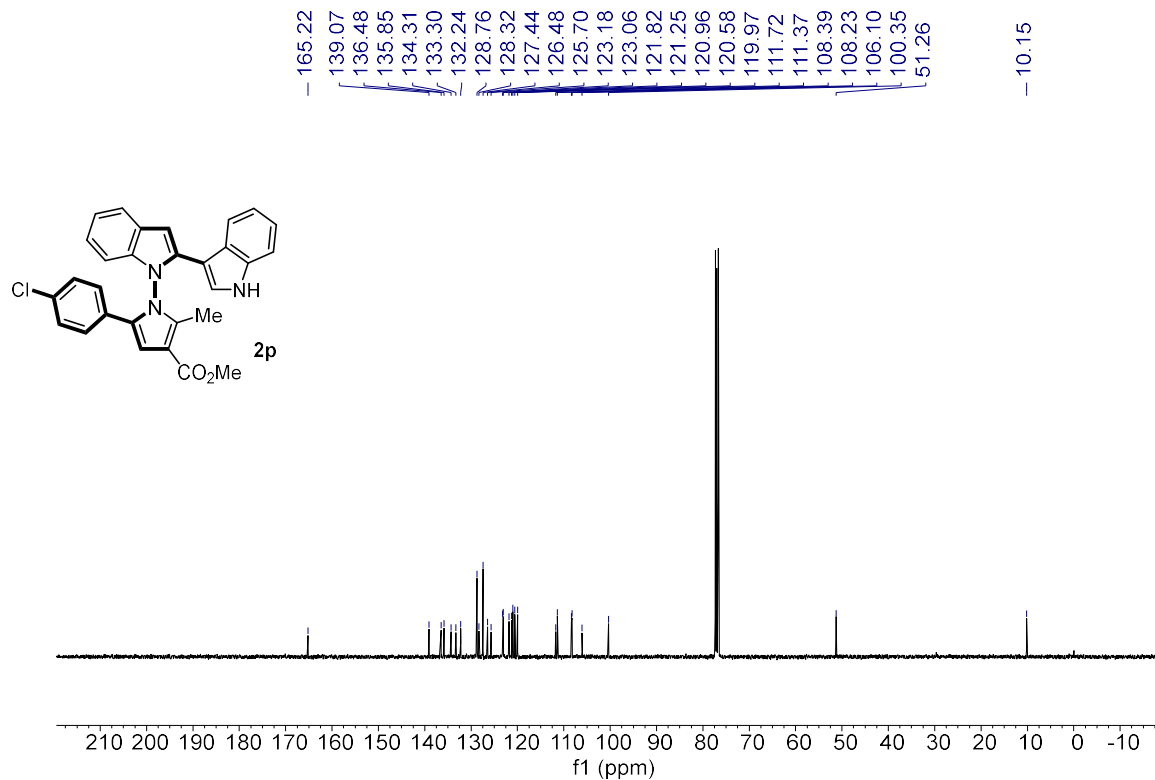

<sup>13</sup>C NMR (101 MHz, CDCl<sub>3</sub>) of **2p**

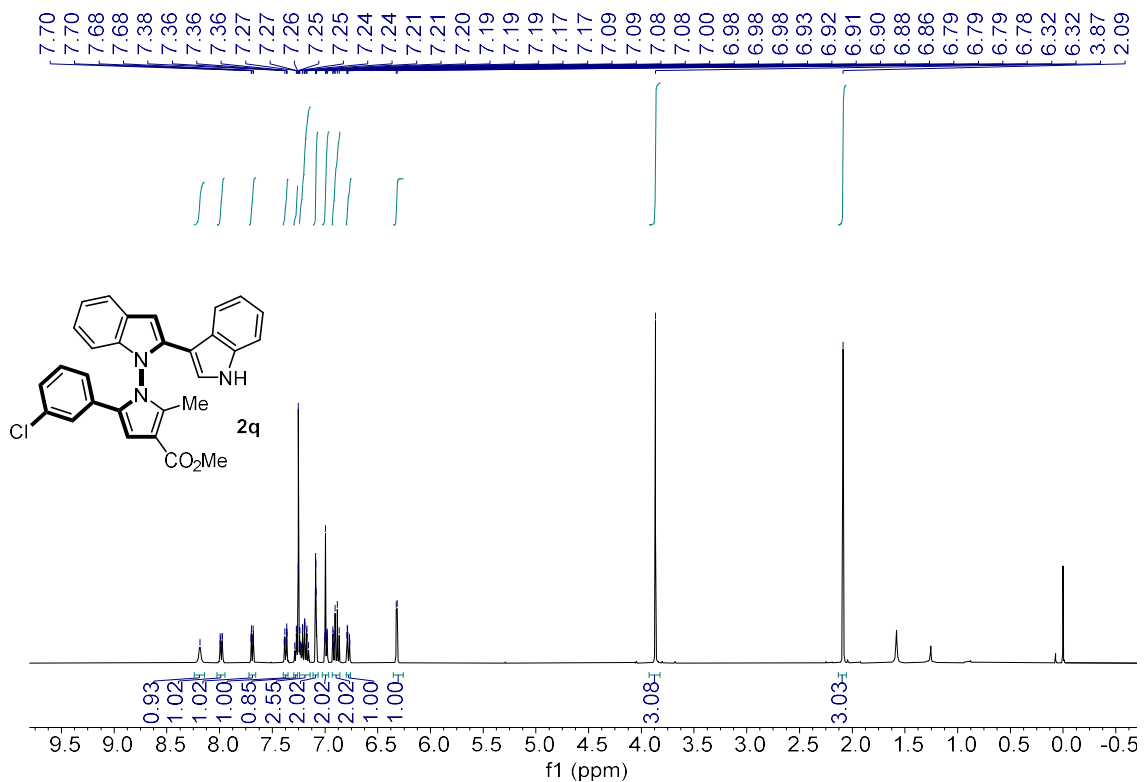

<sup>1</sup>H NMR (400 MHz, CDCl<sub>3</sub>) of **2q**

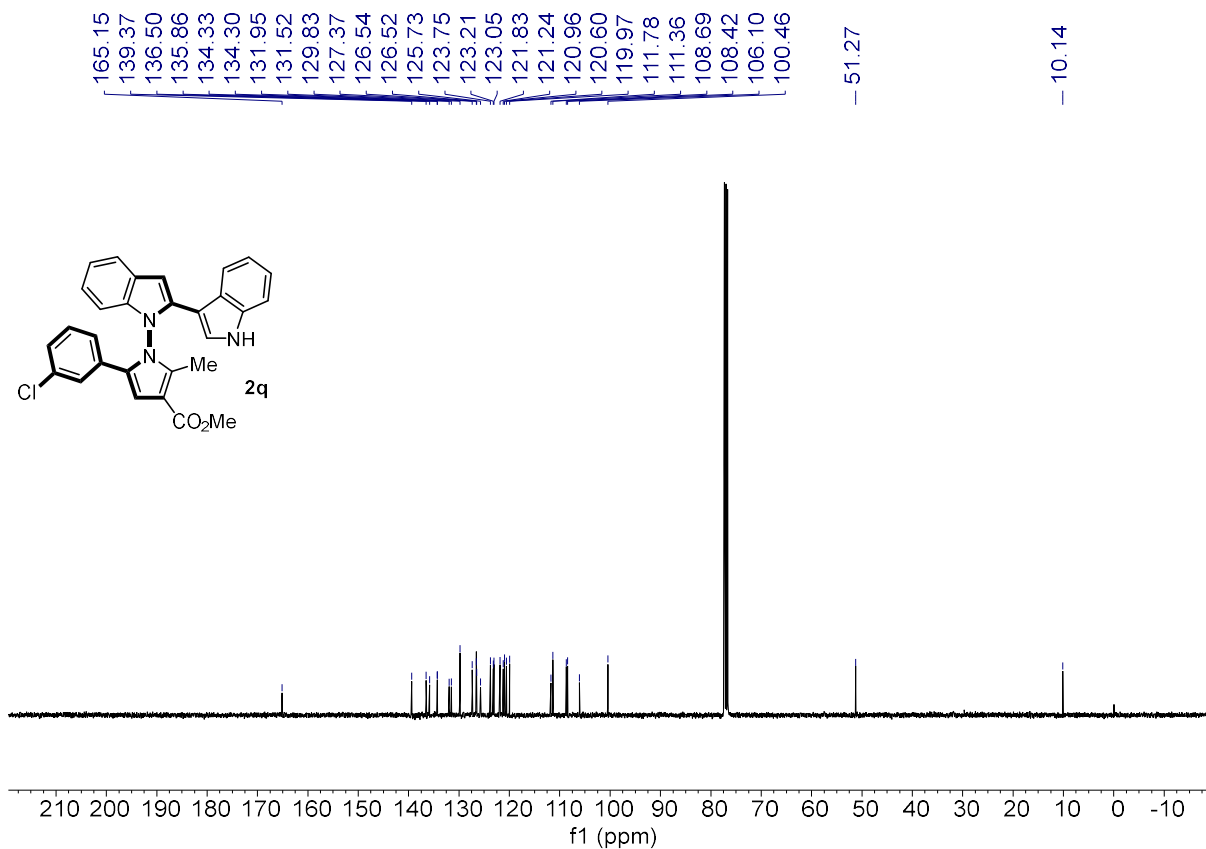

<sup>13</sup>C NMR (101 MHz, CDCl<sub>3</sub>) of **2q**

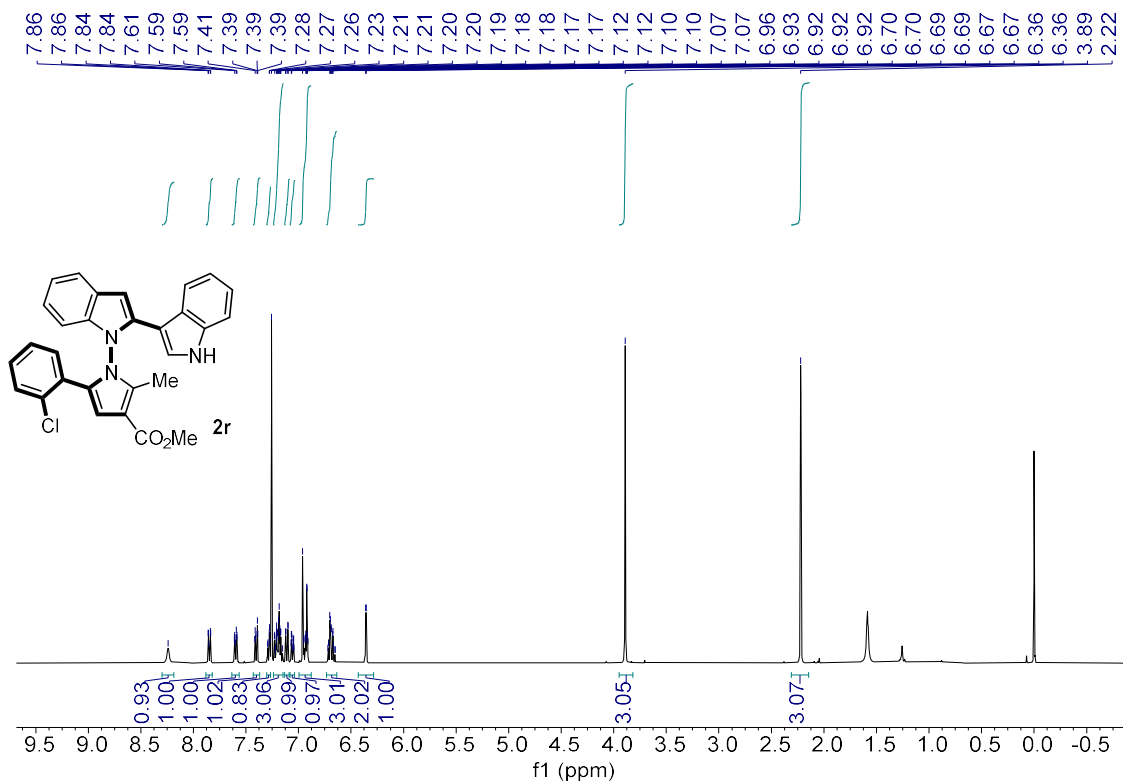

<sup>1</sup>H NMR (400 MHz, CDCl<sub>3</sub>) of **2r**

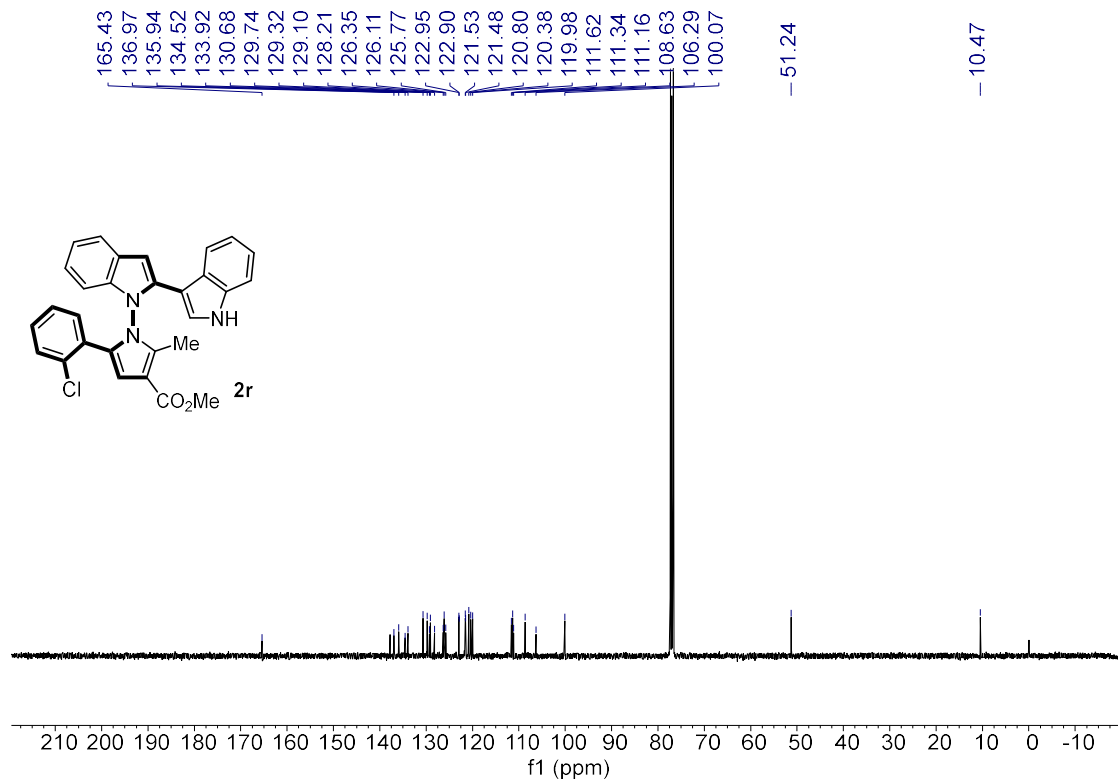

<sup>13</sup>C NMR (101 MHz, CDCl<sub>3</sub>) of **2r**

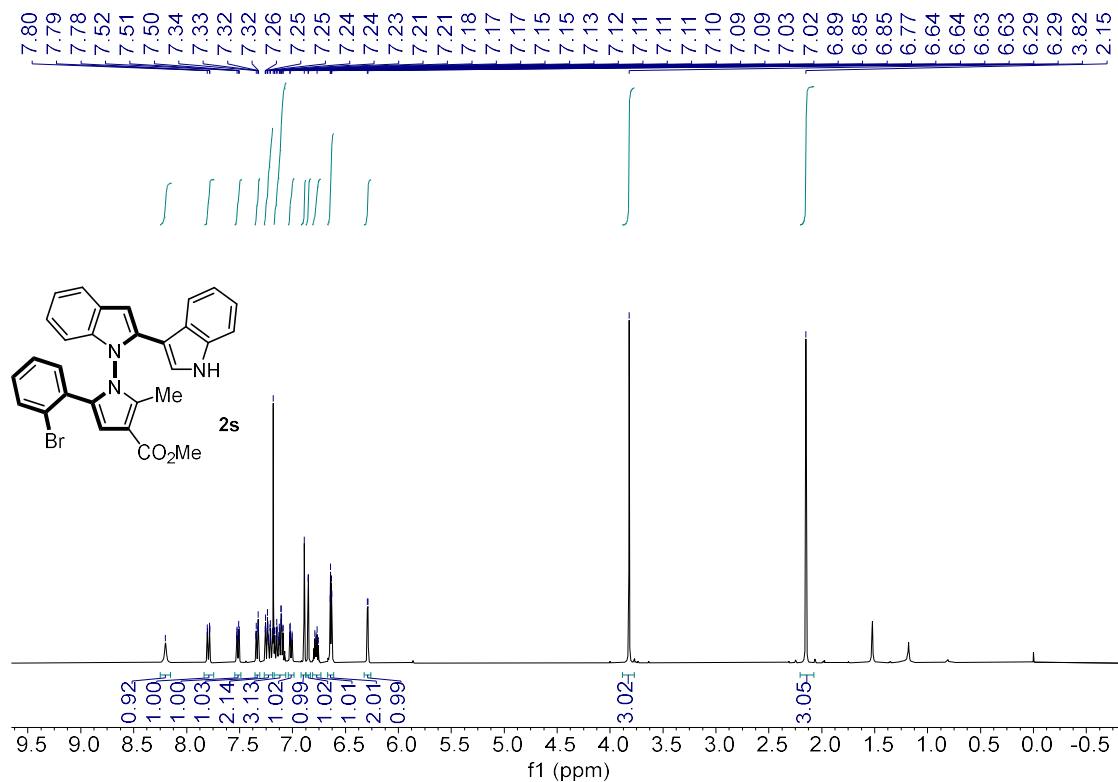

<sup>1</sup>H NMR (400 MHz, CDCl<sub>3</sub>) of **2s**

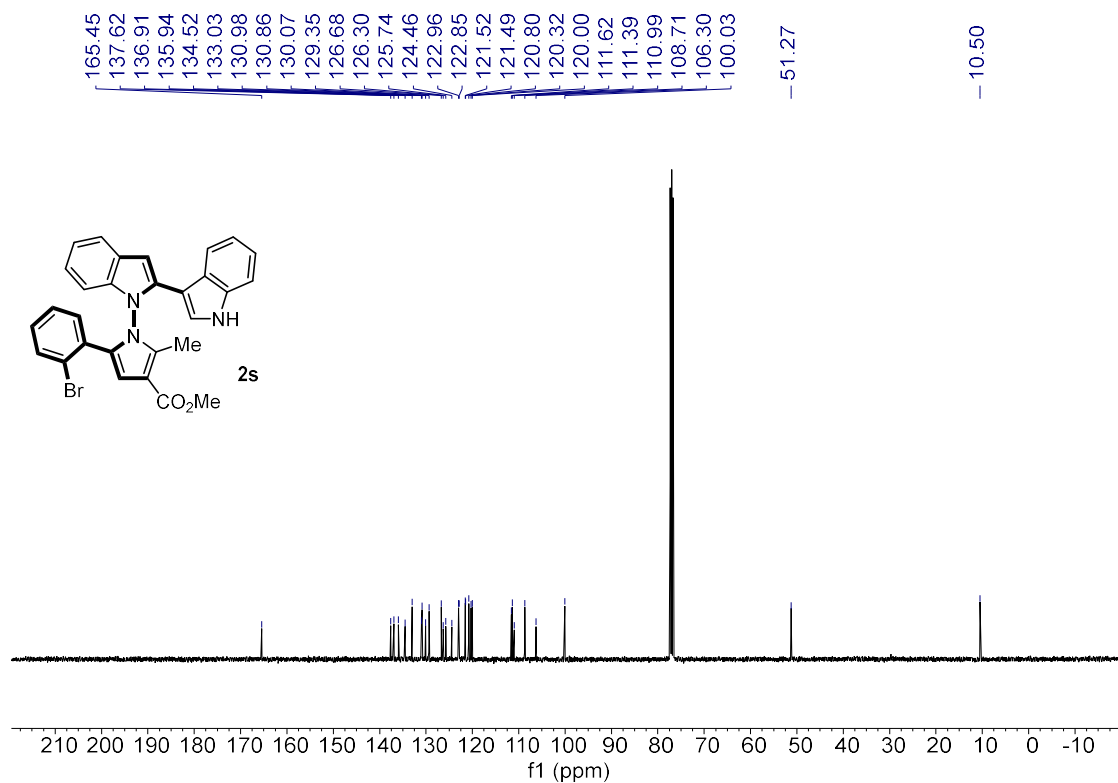

<sup>13</sup>C NMR (101 MHz, CDCl<sub>3</sub>) of **2s**

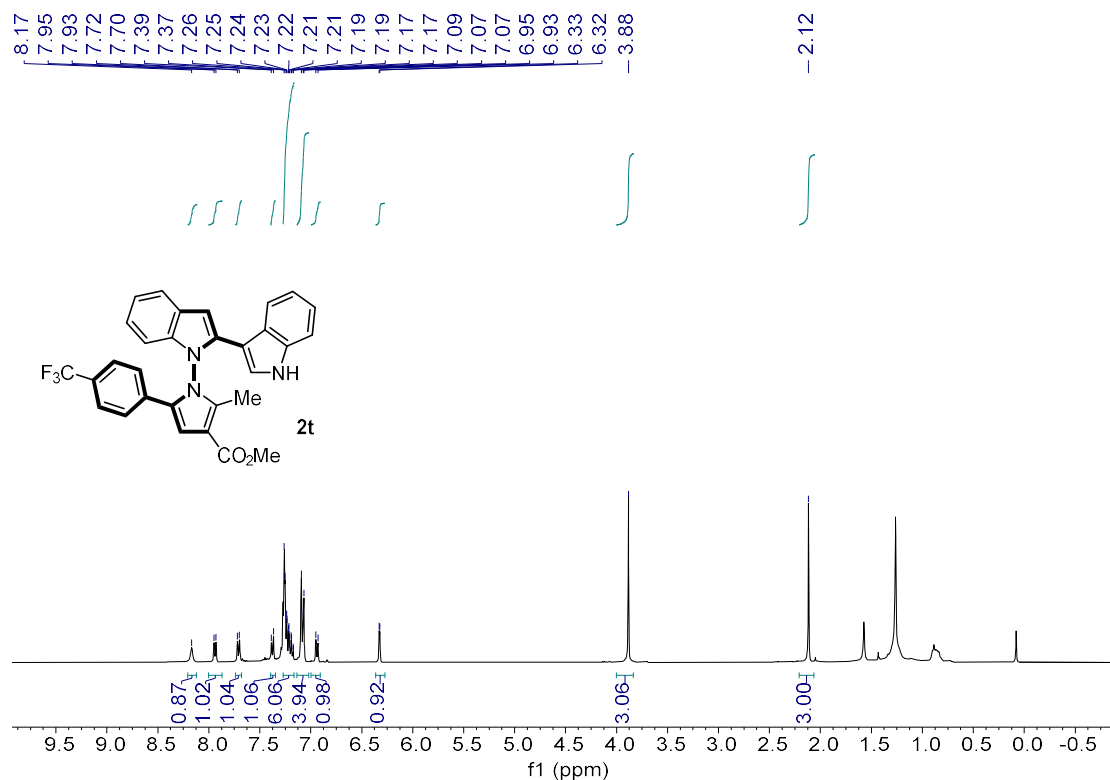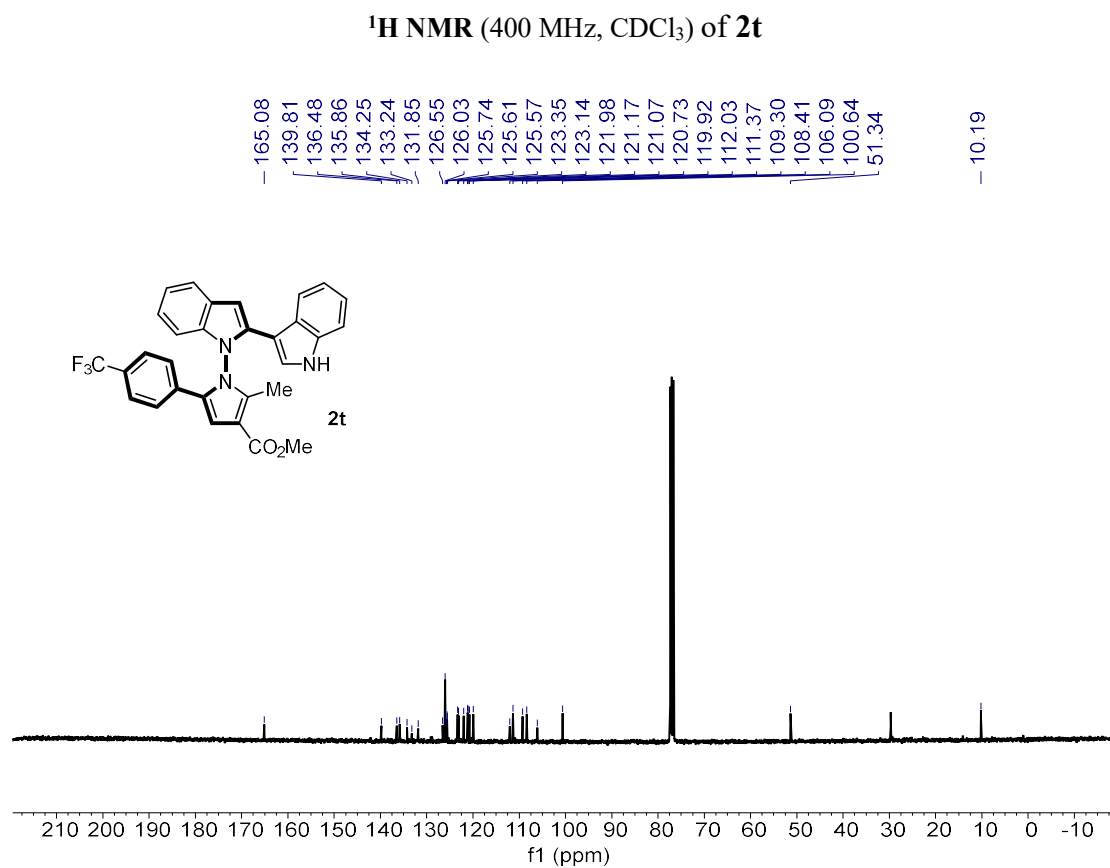



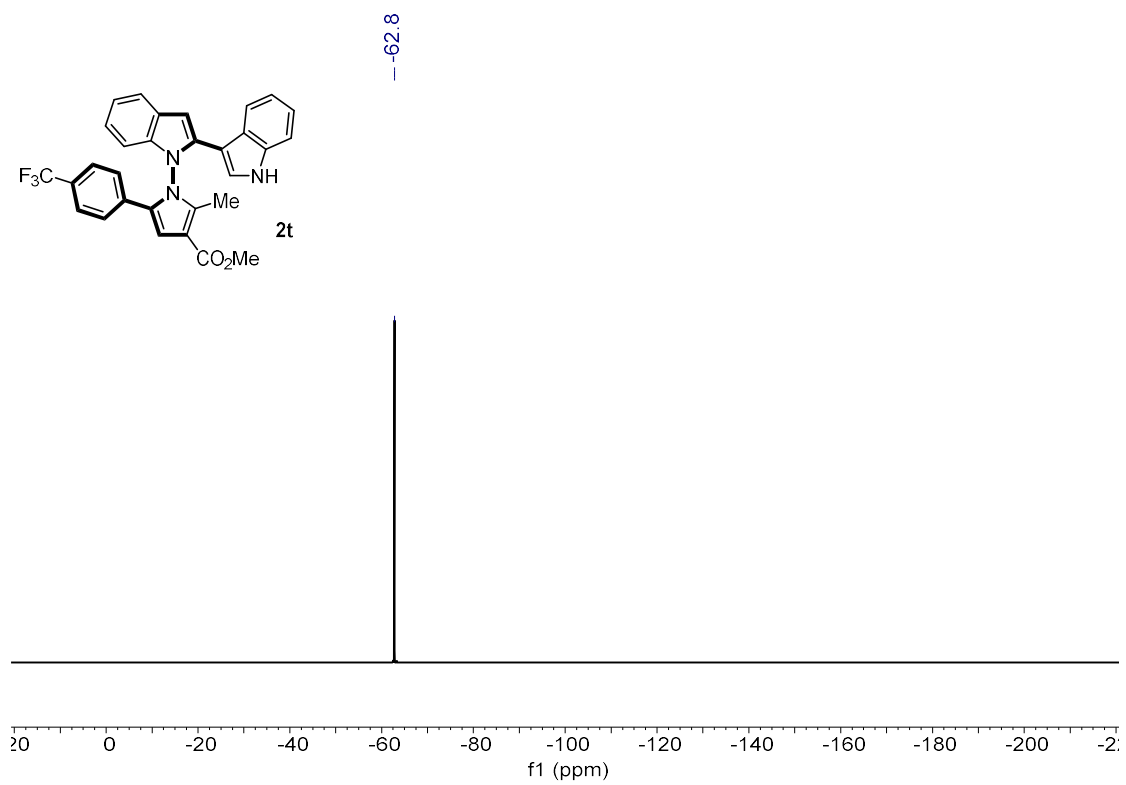

$^{19}\text{F}$  NMR (376 MHz,  $\text{CDCl}_3$ ) of **2t**

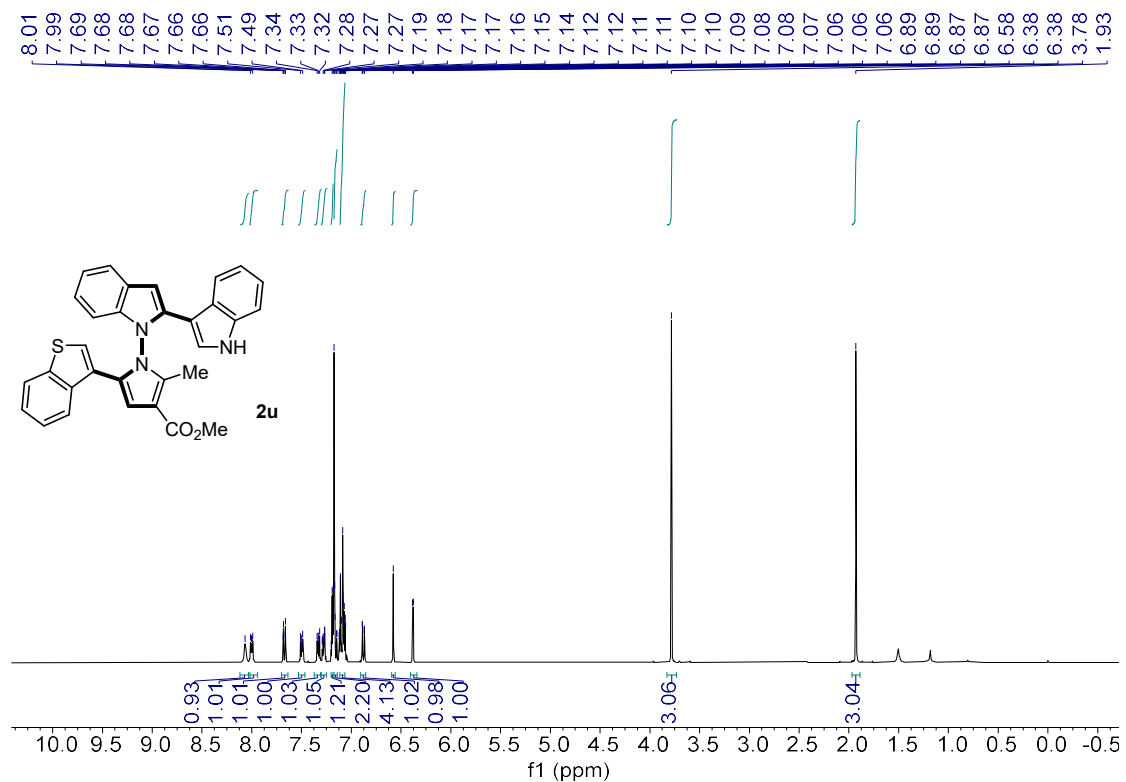

**<sup>1</sup>H NMR (400 MHz, CDCl<sub>3</sub>) of 2u**

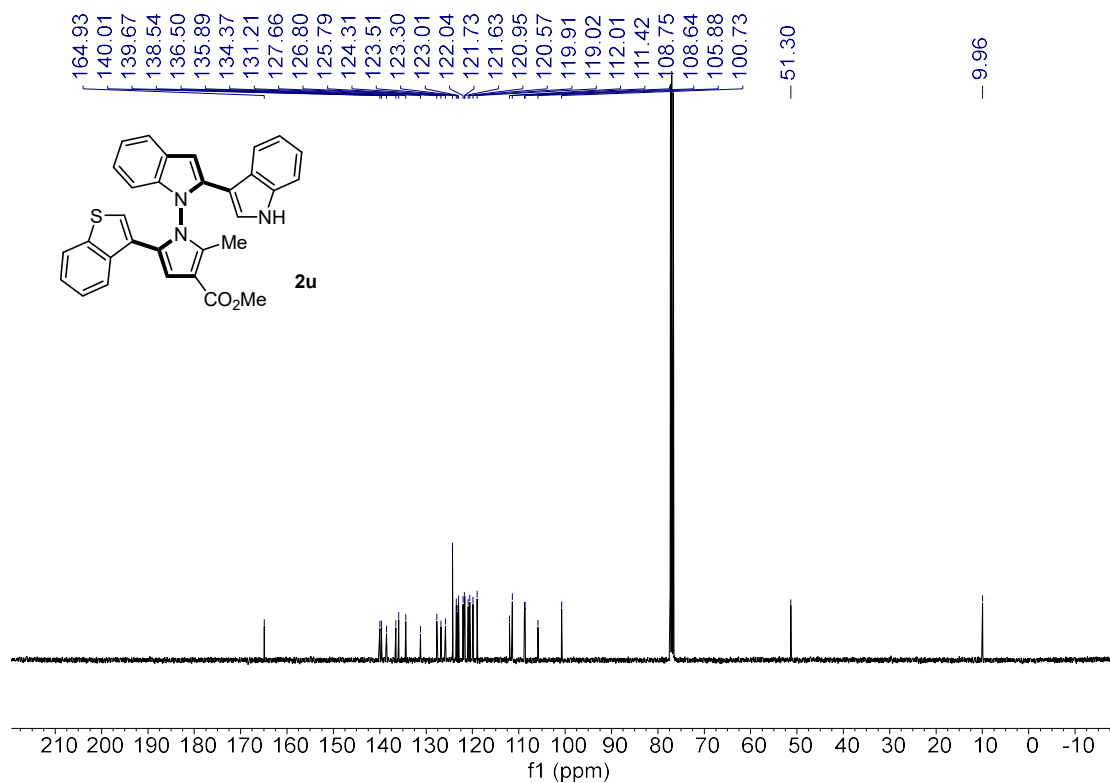

**<sup>13</sup>C NMR (101 MHz, CDCl<sub>3</sub>) of 2u**

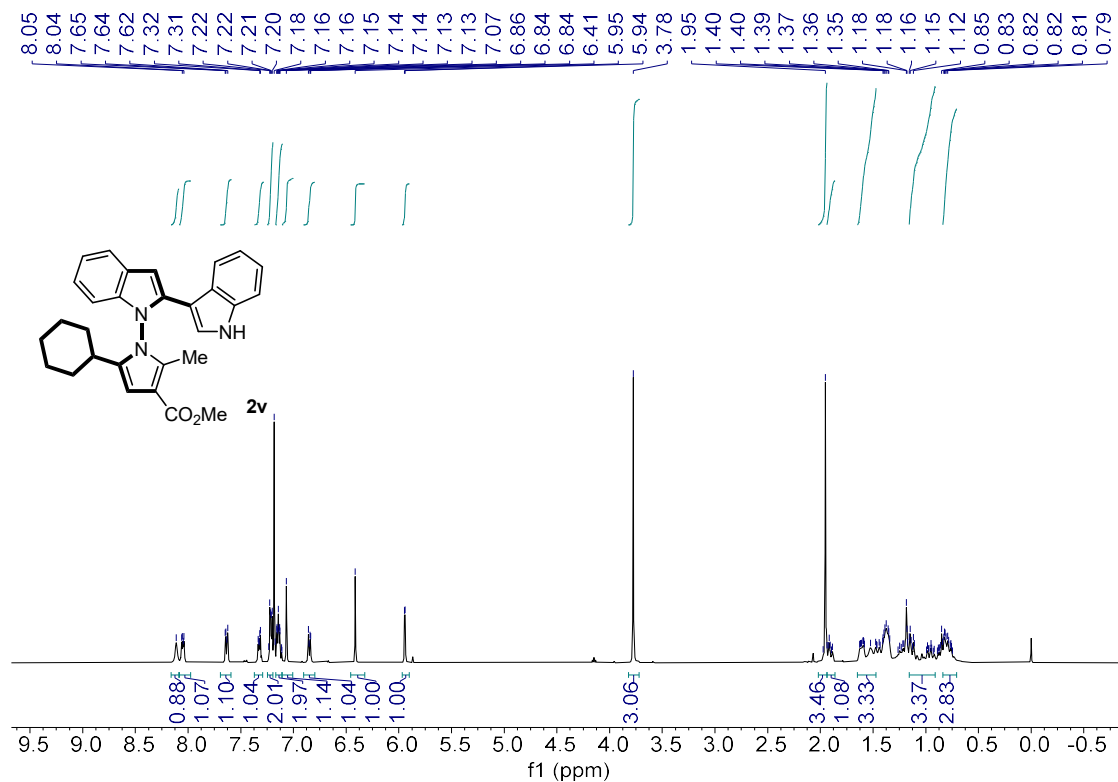

<sup>1</sup>H NMR (400 MHz, CDCl<sub>3</sub>) of **2v**

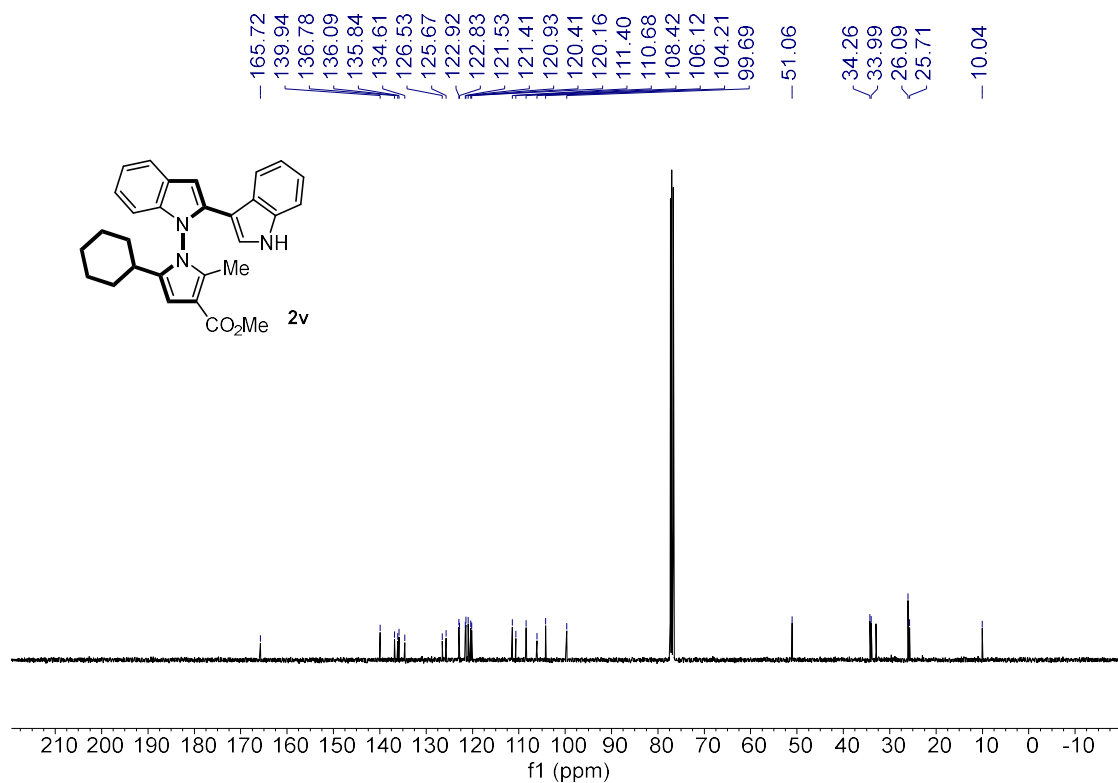

<sup>13</sup>C NMR (101 MHz, CDCl<sub>3</sub>) of **2v**

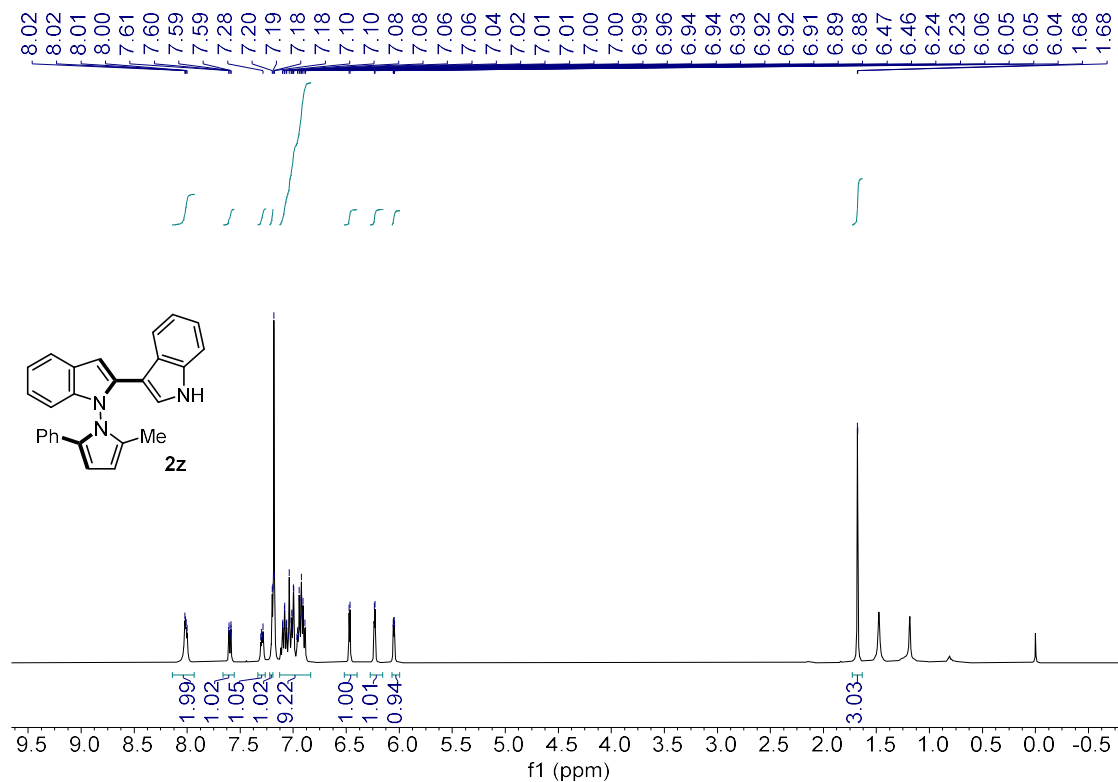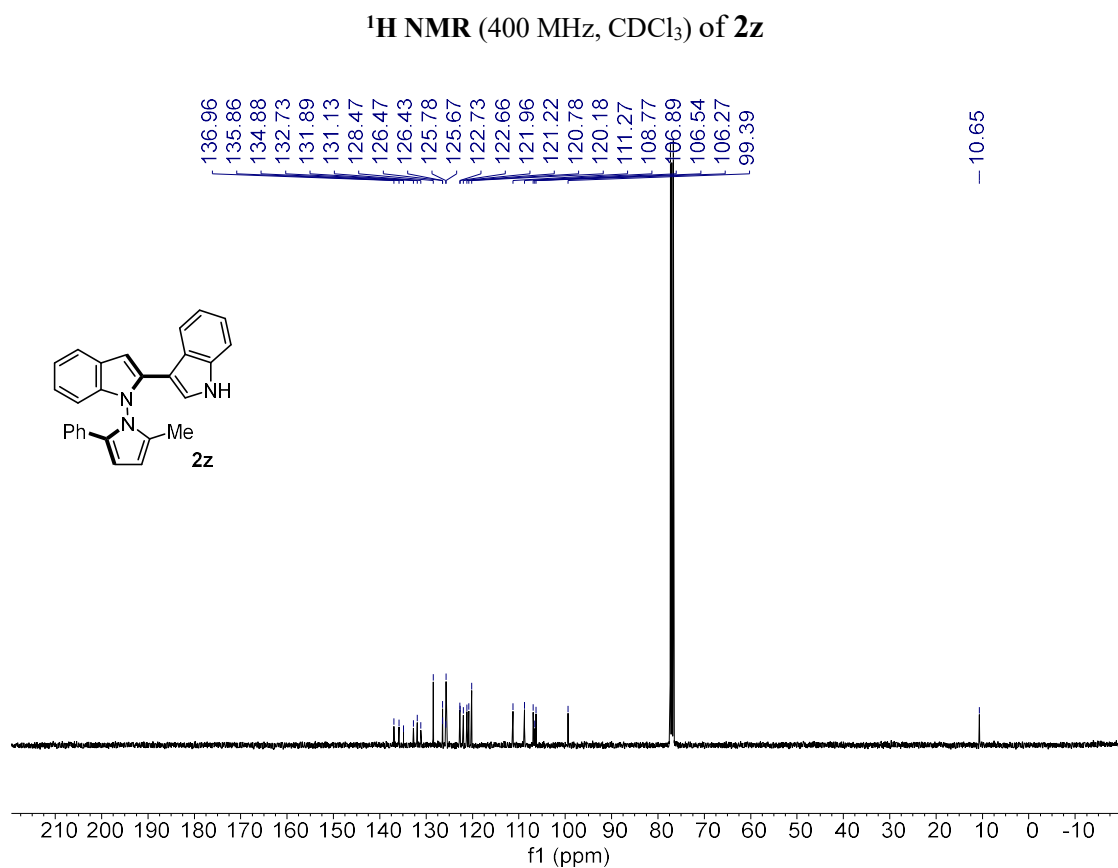

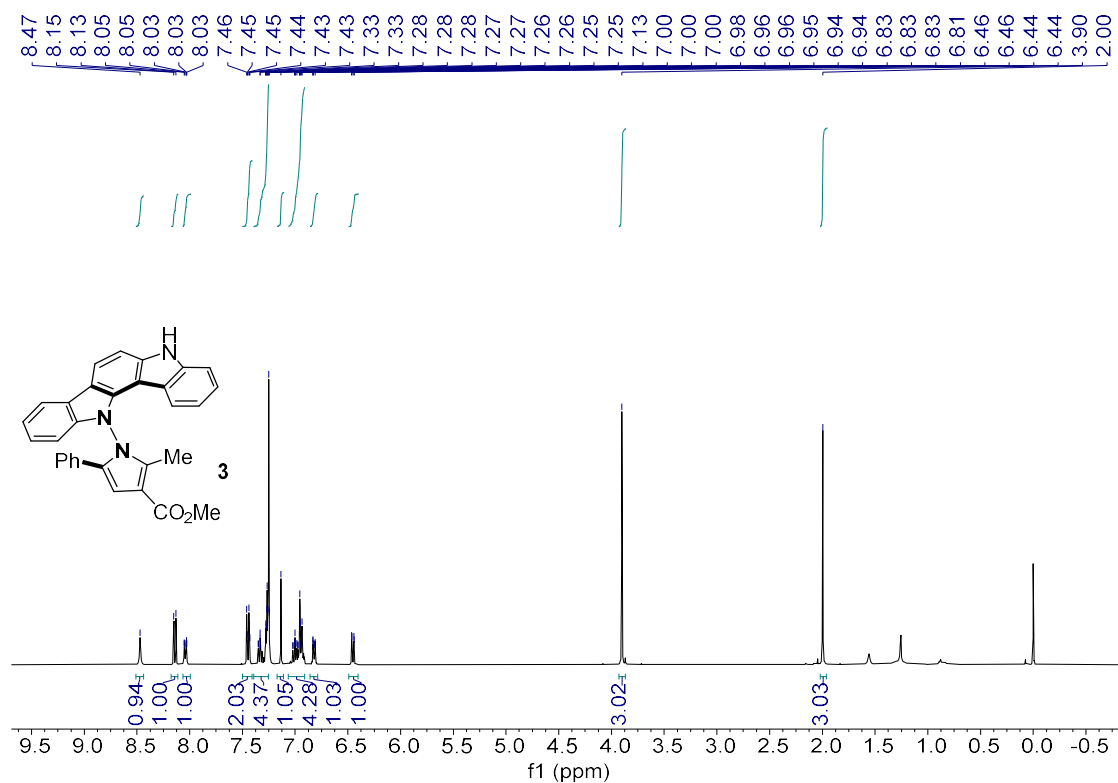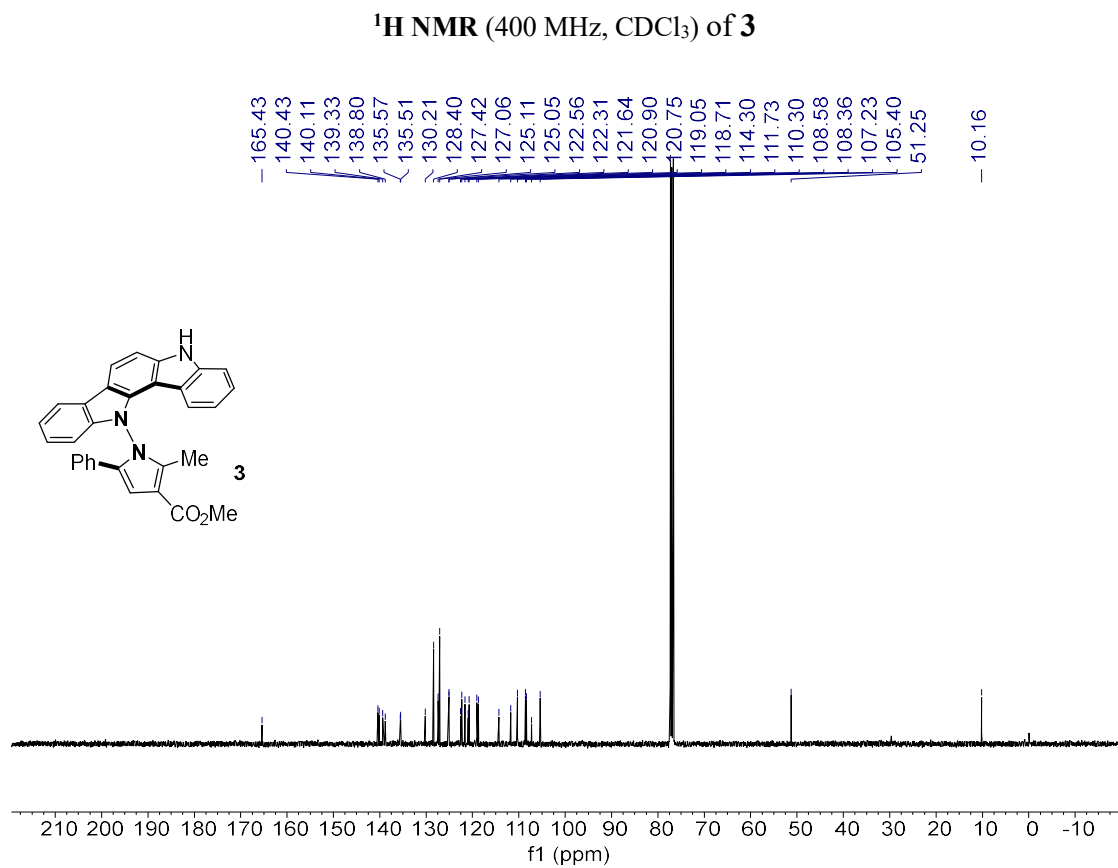

## Computational Mechanistic studies.

**Computational Methods:** All DFT calculations were performed with the Gaussian 09.<sup>1</sup> Geometry optimizations were computed at the M06-2X/6-31G\*\* level of theory.<sup>2</sup> Frequency analysis was performed at the same level to provide correction to thermodynamic functions and confirm the nature of optimized structures (minima and transition states featured zero or one imaginary frequency, respectively). Single-point energies were then calculated at the M06-2X/def2-TZVP<sup>3</sup> level of theory with the Truhlar-Cramer universal solvation model based on density (SMD)<sup>4</sup> for toluene ( $\epsilon$ : 2.3741). Multiwfn<sup>5</sup> was utilized to analyze noncovalent interactions (NCIs) with the independent gradient model based on Hirshfeld partition (IGMH)<sup>6</sup>. Molecular visualizations were performed with PyMOL.<sup>7</sup>

Much efforts have been made to locate the hypothetical transition state of proton transfer **TS3**, but regrettably we can only locate transition state **TS3'** where the proton oscillates between two oxygen atoms in CPA. That is, pre- and post- intermediates are convergent to the product-CPA adduct, which indicates the high tendency of proton transferring from ammonium to phosphate anion without a barrier in the free energy profile.

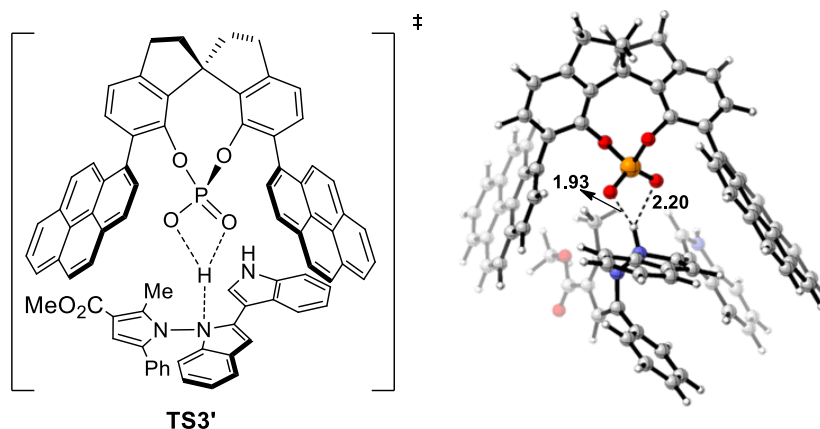

**Figure S1.** Optimized structure for H-oscillation transition state **TS3'**.

## REFERENCES

- [1] Frisch, M. J. et al. Gaussian 09; Gaussian, Inc.: Wallingford, CT, 2009.
- [2] Y. Zhao and D. G. Truhlar, *J. Chem. Phys.* **2006**, *125*, 194101–194118.
- [3] F. Weigend and R. Ahlrichs, *Phys. Chem. Chem. Phys.* **2005**, *7*, 3297-3305.
- [4] A. V. Marenich, C. J. Cramer and D. G. Truhlar, *J. Phys. Chem. B* **2009**, *113*, 6378-6396.
- [5] T. Lu and F. Chen, *J. Comput. Chem.* **2012**, *33*, 580-592.
- [6] T. Lu and Q. Chen, *J. Comput. Chem.* **2022**, *43*, 539-555.
- [7] Delano, W. L. The PyMOL Molecular Graphics System; Delano Scientific, 2002.

## Energies and Cartesian Coordinates (Å) for the Optimized Structures

### IM1

M06-2X SCF energy in Solvent: -3961.951716 a.u.

M06-2X Free energy in Solvent: -3960.919271 a.u.

|   |           |           |           |
|---|-----------|-----------|-----------|
| P | 2.909471  | -0.600147 | -0.249457 |
| O | 2.560387  | 0.651323  | 0.431811  |
| O | 3.713918  | -1.578212 | 0.744664  |
| O | 3.895636  | -0.500501 | -1.526845 |
| C | 1.846377  | -3.812941 | 0.929462  |
| C | 1.410138  | -3.051792 | 2.034933  |
| C | 0.892427  | -4.422728 | 0.102830  |
| C | 0.011953  | -2.846687 | 2.223710  |
| C | 2.315960  | -2.468860 | 2.993751  |
| C | -0.466675 | -4.277715 | 0.322472  |
| C | -0.454054 | -1.982602 | 3.262231  |
| C | -0.931148 | -3.471279 | 1.364677  |
| C | 1.870561  | -1.662801 | 3.985986  |
| H | 3.373914  | -2.687373 | 2.902461  |
| H | -1.182037 | -4.739552 | -0.352896 |
| C | 0.472765  | -1.359146 | 4.137993  |
| C | -1.844865 | -1.730944 | 3.413038  |
| C | -2.334039 | -3.221359 | 1.553984  |
| H | 2.571009  | -1.225949 | 4.692100  |
| C | 0.001638  | -0.486926 | 5.124401  |
| C | -2.274658 | -0.851386 | 4.412922  |
| C | -2.770645 | -2.384878 | 2.525434  |
| H | -3.034508 | -3.700714 | 0.875150  |
| C | -1.358965 | -0.229894 | 5.253639  |
| H | 0.715210  | -0.008111 | 5.789241  |
| H | -3.336340 | -0.644676 | 4.514225  |
| H | -3.833596 | -2.190443 | 2.649407  |
| H | -1.709996 | 0.459142  | 6.014892  |
| H | 1.234344  | -4.981115 | -0.763194 |
| C | 5.744717  | -4.218772 | -0.786716 |
| C | 4.114271  | -2.839414 | 0.322477  |
| C | 3.265644  | -3.945199 | 0.502471  |
| C | 3.736427  | -5.195135 | 0.073704  |
| C | 4.957455  | -5.341533 | -0.574931 |
| H | 3.098618  | -6.060176 | 0.227415  |
| H | 5.272846  | -6.316097 | -0.935125 |
| C | 7.296903  | 0.270914  | -0.364562 |
| C | 6.176519  | -0.467125 | -0.763897 |
| C | 5.068432  | 0.206873  | -1.259259 |

|   |           |           |           |
|---|-----------|-----------|-----------|
| C | 5.069948  | 1.601196  | -1.404534 |
| C | 6.238175  | 2.297891  | -1.077061 |
| C | 7.346285  | 1.646343  | -0.543505 |
| H | 8.223174  | 2.212653  | -0.244550 |
| C | 6.443696  | -1.949045 | -0.561359 |
| C | 5.349991  | -2.970165 | -0.297988 |
| H | 6.245684  | 3.376763  | -1.201598 |
| C | 8.309685  | -0.630958 | 0.301268  |
| H | 8.737821  | -0.179074 | 1.200011  |
| C | 7.472635  | -1.887085 | 0.602296  |
| H | 6.928352  | -1.751698 | 1.542792  |
| H | 8.065288  | -2.802745 | 0.679390  |
| C | 7.036983  | -4.098565 | -1.559227 |
| H | 7.024960  | -4.683899 | -2.482476 |
| H | 7.888451  | -4.450886 | -0.964180 |
| C | 7.118580  | -2.583074 | -1.811493 |
| H | 6.527090  | -2.323621 | -2.695594 |
| H | 8.137064  | -2.214953 | -1.962926 |
| C | 3.846346  | 2.330809  | -1.832142 |
| C | 3.250205  | 3.287001  | -0.983151 |
| C | 3.271117  | 2.059779  | -3.074889 |
| C | 2.093796  | 3.984162  | -1.427719 |
| C | 3.727076  | 3.541597  | 0.354182  |
| C | 2.138293  | 2.734672  | -3.508443 |
| H | 3.727219  | 1.304483  | -3.707341 |
| C | 1.464712  | 4.948365  | -0.579032 |
| C | 1.536017  | 3.706221  | -2.704512 |
| C | 3.138855  | 4.463020  | 1.152994  |
| H | 4.555377  | 2.952097  | 0.728320  |
| H | 1.710393  | 2.511977  | -4.481751 |
| C | 1.994610  | 5.214959  | 0.712787  |
| C | 0.292882  | 5.626202  | -1.012410 |
| C | 0.359415  | 4.421898  | -3.125556 |
| H | 3.508458  | 4.630349  | 2.160689  |
| C | 1.354168  | 6.150835  | 1.537699  |
| C | -0.327407 | 6.540461  | -0.152332 |
| C | -0.233256 | 5.336891  | -2.322261 |
| H | -0.050917 | 4.202489  | -4.107519 |
| C | 0.200041  | 6.800953  | 1.108919  |
| H | 1.766385  | 6.354626  | 2.522300  |
| H | -1.229276 | 7.048050  | -0.483663 |
| H | -1.127165 | 5.862731  | -2.646333 |
| H | -0.289541 | 7.517300  | 1.761000  |
| H | 9.142871  | -0.857990 | -0.374934 |



|   |           |           |           |
|---|-----------|-----------|-----------|
| C | -1.058372 | 0.050985  | 0.171543  |
| C | -1.279602 | -0.880744 | -0.583167 |
| H | 0.880453  | -1.256199 | -0.471522 |
| O | 1.740681  | -1.437276 | -0.905182 |
| C | -1.797381 | -1.804292 | -1.546964 |
| C | -3.200016 | -1.977315 | -1.616409 |
| C | -0.979115 | -2.464914 | -2.471724 |
| N | -4.004180 | -1.405917 | -0.611114 |
| C | -3.746856 | -2.757650 | -2.635075 |
| C | -1.532021 | -3.261879 | -3.465404 |
| H | 0.095906  | -2.330476 | -2.407960 |
| C | -2.916083 | -3.392201 | -3.552253 |
| H | -4.824085 | -2.852449 | -2.713852 |
| H | -0.886677 | -3.763613 | -4.177925 |
| H | -3.359212 | -3.993621 | -4.339385 |
| N | -5.284170 | -0.997634 | -0.949041 |
| C | -5.654480 | 0.310764  | -1.264653 |
| C | -6.380419 | -1.814510 | -0.865043 |
| C | -7.017307 | 0.301052  | -1.413192 |
| C | -7.475251 | -1.025386 | -1.185156 |
| H | -7.640170 | 1.145708  | -1.668577 |
| C | -6.264913 | -3.247105 | -0.461617 |
| H | -5.269170 | -3.437109 | -0.055154 |
| H | -6.436583 | -3.920413 | -1.306845 |
| H | -7.018892 | -3.482020 | 0.290810  |
| C | -4.709372 | 1.438782  | -1.219712 |
| C | -5.072296 | 2.583830  | -0.497381 |
| C | -3.448455 | 1.395068  | -1.827515 |
| C | -4.187143 | 3.645546  | -0.362434 |
| H | -6.037935 | 2.608402  | -0.001509 |
| C | -2.560693 | 2.458060  | -1.684827 |
| H | -3.160141 | 0.526430  | -2.413440 |
| C | -2.923239 | 3.579663  | -0.944391 |
| H | -4.467823 | 4.507092  | 0.235140  |
| H | -1.571469 | 2.398969  | -2.130238 |
| H | -2.209015 | 4.383952  | -0.794742 |
| C | -8.878159 | -1.426915 | -1.281479 |
| O | -9.796858 | -0.682112 | -1.537649 |
| C | -3.357725 | 1.239522  | 2.101157  |
| C | -2.098386 | 1.733313  | 1.744266  |
| C | -4.202523 | 2.040330  | 2.852312  |
| C | -1.726894 | 3.030524  | 2.157341  |
| C | -0.992471 | 1.217984  | 0.969202  |
| C | -3.813289 | 3.332526  | 3.252564  |

|   |            |           |           |
|---|------------|-----------|-----------|
| H | -5.182756  | 1.669717  | 3.135094  |
| C | -2.572168  | 3.845825  | 2.912649  |
| C | -0.023129  | 2.200081  | 0.952708  |
| H | -4.497524  | 3.936509  | 3.839827  |
| H | -2.265941  | 4.842481  | 3.215171  |
| H | -3.657256  | 0.233646  | 1.815873  |
| N | -0.463877  | 3.275938  | 1.663773  |
| H | 0.063325   | 4.127570  | 1.795823  |
| H | 0.956670   | 2.179507  | 0.493590  |
| O | -9.057286  | -2.749441 | -1.052389 |
| C | -10.411390 | -3.181984 | -1.132811 |
| H | -10.399124 | -4.248401 | -0.911409 |
| H | -10.813784 | -3.002025 | -2.132352 |
| H | -11.029861 | -2.646137 | -0.409195 |
| H | -3.523422  | -0.687815 | -0.076180 |

### TS1

M06-2X SCF energy in Solvent: -3961.91928 a.u.

M06-2X Free energy in Solvent: -3960.892374 a.u.

|   |           |           |           |
|---|-----------|-----------|-----------|
| P | 2.752476  | -0.621304 | -0.508391 |
| O | 2.220600  | 0.527373  | 0.260096  |
| O | 3.344200  | -1.711019 | 0.573551  |
| O | 4.122435  | -0.257851 | -1.344000 |
| C | 1.645023  | -3.954970 | -0.179165 |
| C | 0.900296  | -3.660818 | 0.978926  |
| C | 0.971200  | -4.245733 | -1.372944 |
| C | -0.523441 | -3.679643 | 0.908909  |
| C | 1.515301  | -3.368943 | 2.250136  |
| C | -0.409297 | -4.251314 | -1.449144 |
| C | -1.306551 | -3.410624 | 2.074342  |
| C | -1.177969 | -3.977417 | -0.313820 |
| C | 0.771995  | -3.102114 | 3.349901  |
| H | 2.597658  | -3.365399 | 2.308487  |
| H | -0.906559 | -4.451055 | -2.394464 |
| C | -0.667013 | -3.115561 | 3.308035  |
| C | -2.727586 | -3.455572 | 2.011801  |
| C | -2.613279 | -3.980970 | -0.360313 |
| H | 1.254695  | -2.882607 | 4.297884  |
| C | -1.449547 | -2.874522 | 4.442133  |
| C | -3.474437 | -3.226220 | 3.174988  |
| C | -3.357811 | -3.730620 | 0.746945  |
| H | -3.087354 | -4.215611 | -1.309921 |
| C | -2.838157 | -2.938119 | 4.376776  |
| H | -0.957016 | -2.644720 | 5.382643  |

|   |           |           |           |
|---|-----------|-----------|-----------|
| H | -4.559084 | -3.270692 | 3.123552  |
| H | -4.443912 | -3.751056 | 0.704787  |
| H | -3.427469 | -2.758054 | 5.270577  |
| H | 1.562212  | -4.427156 | -2.264946 |
| C | 5.875610  | -3.989849 | -0.781919 |
| C | 3.922852  | -2.853737 | 0.064571  |
| C | 3.131784  | -3.974104 | -0.241735 |
| C | 3.761188  | -5.104641 | -0.778028 |
| C | 5.123659  | -5.123226 | -1.056013 |
| H | 3.148282  | -5.970365 | -1.011374 |
| H | 5.579834  | -5.997312 | -1.510968 |
| C | 6.950315  | 0.339200  | 0.913938  |
| C | 6.050290  | -0.323881 | 0.074124  |
| C | 5.082713  | 0.404465  | -0.606705 |
| C | 5.031285  | 1.802915  | -0.491487 |
| C | 6.000674  | 2.445002  | 0.287565  |
| C | 6.950360  | 1.724330  | 1.005926  |
| H | 7.662044  | 2.239081  | 1.644489  |
| C | 6.350450  | -1.811739 | 0.072224  |
| C | 5.290446  | -2.868219 | -0.187354 |
| H | 5.974188  | 3.528929  | 0.355135  |
| C | 7.794163  | -0.660096 | 1.671115  |
| H | 7.915211  | -0.388242 | 2.723361  |
| C | 7.001454  | -1.965215 | 1.475265  |
| H | 6.202797  | -2.027486 | 2.221939  |
| H | 7.613804  | -2.868406 | 1.552144  |
| C | 7.326530  | -3.719291 | -1.102475 |
| H | 7.616333  | -4.109313 | -2.082011 |
| H | 7.988979  | -4.182486 | -0.360527 |
| C | 7.388045  | -2.184055 | -1.025214 |
| H | 7.054151  | -1.754975 | -1.975753 |
| H | 8.385611  | -1.792830 | -0.805250 |
| C | 3.953779  | 2.581421  | -1.153975 |
| C | 3.134824  | 3.462593  | -0.415942 |
| C | 3.744800  | 2.446151  | -2.528869 |
| C | 2.158618  | 4.243346  | -1.095604 |
| C | 3.205652  | 3.566993  | 1.021159  |
| C | 2.773554  | 3.183691  | -3.189367 |
| H | 4.359567  | 1.743101  | -3.080961 |
| C | 1.344455  | 5.171487  | -0.371961 |
| C | 1.975705  | 4.098987  | -2.496723 |
| C | 2.446285  | 4.457606  | 1.705582  |
| H | 3.866498  | 2.893729  | 1.553755  |
| H | 2.631225  | 3.059874  | -4.259220 |

|   |           |           |           |
|---|-----------|-----------|-----------|
| C | 1.504225  | 5.315339  | 1.033942  |
| C | 0.378322  | 5.960766  | -1.054551 |
| C | 0.974626  | 4.893203  | -3.157695 |
| H | 2.523896  | 4.523719  | 2.788307  |
| C | 0.714840  | 6.246818  | 1.722989  |
| C | -0.387142 | 6.883229  | -0.329901 |
| C | 0.215536  | 5.784154  | -2.474923 |
| H | 0.843334  | 4.762494  | -4.228285 |
| C | -0.214420 | 7.028659  | 1.042728  |
| H | 0.851699  | 6.365882  | 2.795219  |
| H | -1.123349 | 7.485384  | -0.854780 |
| H | -0.534587 | 6.381386  | -2.985220 |
| H | -0.811317 | 7.753448  | 1.587374  |
| H | 8.799845  | -0.735824 | 1.239484  |
| C | -0.773725 | -0.040532 | -0.071988 |
| C | -0.614214 | -0.806785 | -1.073950 |
| H | 0.569101  | -1.218638 | -1.154842 |
| O | 1.891156  | -1.356707 | -1.522578 |
| C | -1.426396 | -0.995775 | -2.282982 |
| C | -2.824059 | -0.804159 | -2.261178 |
| C | -0.792147 | -1.312191 | -3.484560 |
| N | -3.423043 | -0.578413 | -1.003949 |
| C | -3.537391 | -0.816927 | -3.458650 |
| C | -1.513700 | -1.353849 | -4.674013 |
| H | 0.280664  | -1.483978 | -3.464447 |
| C | -2.877687 | -1.080342 | -4.657749 |
| H | -4.604968 | -0.623931 | -3.448459 |
| H | -1.009780 | -1.578571 | -5.607573 |
| H | -3.446301 | -1.085109 | -5.582098 |
| N | -4.771174 | -0.285227 | -0.935257 |
| C | -5.233930 | 0.926882  | -0.426719 |
| C | -5.816938 | -1.159955 | -1.135031 |
| C | -6.595105 | 0.819036  | -0.323068 |
| C | -6.965004 | -0.479570 | -0.768650 |
| H | -7.279427 | 1.589240  | 0.000648  |
| C | -5.628665 | -2.540631 | -1.670162 |
| H | -4.569351 | -2.766541 | -1.784153 |
| H | -6.114187 | -2.644090 | -2.644541 |
| H | -6.090853 | -3.275997 | -1.007632 |
| C | -4.366687 | 2.061420  | -0.087213 |
| C | -4.676191 | 2.818421  | 1.049908  |
| C | -3.280734 | 2.445549  | -0.883977 |
| C | -3.924881 | 3.940669  | 1.377912  |
| H | -5.499436 | 2.504760  | 1.684455  |

|   |            |           |           |
|---|------------|-----------|-----------|
| C | -2.526091  | 3.565302  | -0.548118 |
| H | -3.035923  | 1.875668  | -1.775137 |
| C | -2.845277  | 4.316728  | 0.581584  |
| H | -4.173769  | 4.511712  | 2.267162  |
| H | -1.683697  | 3.855354  | -1.171724 |
| H | -2.244847  | 5.184373  | 0.839658  |
| C | -8.349768  | -0.952489 | -0.817083 |
| O | -9.311764  | -0.308862 | -0.465027 |
| C | -2.636456  | 0.091363  | 2.654875  |
| C | -1.651911  | 0.922554  | 2.128413  |
| C | -3.313150  | 0.512476  | 3.790943  |
| C | -1.371864  | 2.149858  | 2.750879  |
| C | -0.815982  | 0.867584  | 0.939632  |
| C | -3.022997  | 1.744022  | 4.398582  |
| H | -4.078768  | -0.127428 | 4.217587  |
| C | -2.041077  | 2.584351  | 3.889472  |
| C | -0.064749  | 2.060774  | 0.926713  |
| H | -3.574871  | 2.045210  | 5.282720  |
| H | -1.818705  | 3.542092  | 4.348763  |
| H | -2.857426  | -0.866639 | 2.195144  |
| N | -0.378499  | 2.784156  | 1.997995  |
| H | 0.011314   | 3.700298  | 2.183254  |
| H | 0.703723   | 2.350881  | 0.221554  |
| O | -8.454502  | -2.210971 | -1.303569 |
| C | -9.786986  | -2.711719 | -1.358826 |
| H | -9.712475  | -3.713625 | -1.779233 |
| H | -10.410392 | -2.074856 | -1.989935 |
| H | -10.226332 | -2.745930 | -0.359177 |
| H | -3.132294  | -1.244688 | -0.290060 |

## IM2

M06-2X SCF energy in Solvent: -3961.928493 a.u.

M06-2X Free energy in Solvent: -3960.899445 a.u.

|   |           |           |           |
|---|-----------|-----------|-----------|
| P | 2.753913  | -0.648921 | -0.816499 |
| O | 2.128769  | 0.507649  | -0.114815 |
| O | 3.299792  | -1.644053 | 0.406405  |
| O | 4.216855  | -0.204299 | -1.466784 |
| C | 1.672774  | -3.984512 | -0.132335 |
| C | 0.963960  | -3.655831 | 1.042504  |
| C | 0.957018  | -4.383398 | -1.270456 |
| C | -0.460037 | -3.738792 | 1.043249  |
| C | 1.619855  | -3.238545 | 2.257542  |
| C | -0.424371 | -4.474177 | -1.271496 |
| C | -1.204412 | -3.381008 | 2.210709  |

|   |           |           |           |
|---|-----------|-----------|-----------|
| C | -1.155159 | -4.154974 | -0.122484 |
| C | 0.913588  | -2.902449 | 3.362592  |
| H | 2.702430  | -3.190291 | 2.266596  |
| H | -0.953611 | -4.760571 | -2.176192 |
| C | -0.524704 | -2.957438 | 3.384290  |
| C | -2.626071 | -3.453026 | 2.208806  |
| C | -2.591799 | -4.189612 | -0.109948 |
| H | 1.427553  | -2.587006 | 4.266064  |
| C | -1.268405 | -2.629319 | 4.523559  |
| C | -3.332083 | -3.134488 | 3.376765  |
| C | -3.298365 | -3.851849 | 0.998758  |
| H | -3.099465 | -4.508981 | -1.016878 |
| C | -2.656323 | -2.727572 | 4.521946  |
| H | -0.744600 | -2.305010 | 5.418292  |
| H | -4.416540 | -3.206104 | 3.374089  |
| H | -4.385044 | -3.893302 | 0.999046  |
| H | -3.214877 | -2.481877 | 5.419717  |
| H | 1.513783  | -4.583519 | -2.180002 |
| C | 5.900515  | -3.939834 | -0.767783 |
| C | 3.915308  | -2.800231 | 0.001483  |
| C | 3.156125  | -3.957597 | -0.245462 |
| C | 3.808874  | -5.096642 | -0.732170 |
| C | 5.171746  | -5.095284 | -1.011325 |
| H | 3.217994  | -5.988004 | -0.923039 |
| H | 5.646908  | -5.975456 | -1.434031 |
| C | 6.888494  | 0.396311  | 0.961142  |
| C | 6.032004  | -0.261173 | 0.074512  |
| C | 5.082264  | 0.461195  | -0.639633 |
| C | 4.995457  | 1.856403  | -0.482217 |
| C | 5.926207  | 2.496909  | 0.345545  |
| C | 6.865505  | 1.779559  | 1.079635  |
| H | 7.549549  | 2.293226  | 1.748634  |
| C | 6.339314  | -1.747181 | 0.061487  |
| C | 5.289670  | -2.809494 | -0.217542 |
| H | 5.882081  | 3.579026  | 0.432897  |
| C | 7.724258  | -0.605500 | 1.723104  |
| H | 7.816083  | -0.352342 | 2.783098  |
| C | 6.952127  | -1.914403 | 1.481733  |
| H | 6.132374  | -1.995208 | 2.203571  |
| H | 7.570244  | -2.813188 | 1.564589  |
| C | 7.352610  | -3.656442 | -1.075343 |
| H | 7.654420  | -4.050826 | -2.049658 |
| H | 8.012638  | -4.109938 | -0.325255 |
| C | 7.402734  | -2.119045 | -1.009100 |

|   |           |           |           |
|---|-----------|-----------|-----------|
| H | 7.086618  | -1.698137 | -1.969235 |
| H | 8.393517  | -1.721277 | -0.769638 |
| C | 3.921919  | 2.633341  | -1.150771 |
| C | 3.093263  | 3.510995  | -0.417019 |
| C | 3.716291  | 2.496660  | -2.526935 |
| C | 2.109149  | 4.281144  | -1.099320 |
| C | 3.157795  | 3.624407  | 1.019899  |
| C | 2.736921  | 3.221004  | -3.188259 |
| H | 4.336114  | 1.796894  | -3.076553 |
| C | 1.290518  | 5.210726  | -0.382107 |
| C | 1.927112  | 4.129301  | -2.499415 |
| C | 2.397292  | 4.518649  | 1.700047  |
| H | 3.823557  | 2.961460  | 1.559209  |
| H | 2.596582  | 3.092427  | -4.257849 |
| C | 1.451982  | 5.369443  | 1.022943  |
| C | 0.320248  | 5.991816  | -1.069761 |
| C | 0.920227  | 4.911733  | -3.164406 |
| H | 2.475795  | 4.592693  | 2.782151  |
| C | 0.654730  | 6.298183  | 1.707023  |
| C | -0.445881 | 6.919085  | -0.351179 |
| C | 0.155839  | 5.803573  | -2.487958 |
| H | 0.789661  | 4.773121  | -4.234125 |
| C | -0.276335 | 7.072848  | 1.020868  |
| H | 0.788957  | 6.422119  | 2.778827  |
| H | -1.182501 | 7.516542  | -0.880922 |
| H | -0.597705 | 6.393140  | -3.001972 |
| H | -0.876178 | 7.798970  | 1.560444  |
| H | 8.741072  | -0.661811 | 1.314808  |
| C | -0.795246 | -0.277419 | 0.061020  |
| C | -0.648017 | -1.161059 | -0.874240 |
| H | 0.225318  | -1.817778 | -0.805121 |
| O | 2.077068  | -1.464416 | -1.862152 |
| C | -1.451922 | -1.243833 | -2.112245 |
| C | -2.829170 | -0.959989 | -2.123543 |
| C | -0.794631 | -1.580084 | -3.295623 |
| N | -3.447186 | -0.684821 | -0.880153 |
| C | -3.514217 | -0.934026 | -3.337049 |
| C | -1.488988 | -1.574051 | -4.502139 |
| H | 0.271967  | -1.788267 | -3.238930 |
| C | -2.837774 | -1.232904 | -4.518684 |
| H | -4.570258 | -0.685169 | -3.353304 |
| H | -0.972926 | -1.815030 | -5.424923 |
| H | -3.381819 | -1.206235 | -5.457479 |
| N | -4.790052 | -0.365637 | -0.868336 |

|   |            |           |           |
|---|------------|-----------|-----------|
| C | -5.250817  | 0.886047  | -0.470090 |
| C | -5.838746  | -1.233960 | -1.067490 |
| C | -6.618352  | 0.808153  | -0.432266 |
| C | -6.990992  | -0.511716 | -0.808814 |
| H | -7.303330  | 1.609869  | -0.198942 |
| C | -5.637438  | -2.651575 | -1.489110 |
| H | -4.578456  | -2.910317 | -1.473451 |
| H | -6.019285  | -2.811651 | -2.501420 |
| H | -6.188813  | -3.326189 | -0.830481 |
| C | -4.378000  | 2.026846  | -0.164626 |
| C | -4.728017  | 2.859148  | 0.905927  |
| C | -3.251270  | 2.349012  | -0.933778 |
| C | -3.980467  | 3.994831  | 1.194273  |
| H | -5.584992  | 2.596123  | 1.518539  |
| C | -2.501714  | 3.484230  | -0.638164 |
| H | -2.976096  | 1.723510  | -1.777630 |
| C | -2.862828  | 4.310615  | 0.425134  |
| H | -4.262991  | 4.624829  | 2.032275  |
| H | -1.634522  | 3.732614  | -1.246238 |
| H | -2.266479  | 5.189803  | 0.652592  |
| C | -8.380441  | -0.965297 | -0.896417 |
| O | -9.345660  | -0.287455 | -0.627480 |
| C | -2.714295  | 0.239084  | 2.723765  |
| C | -1.703397  | 0.961937  | 2.103001  |
| C | -3.354942  | 0.816995  | 3.815388  |
| C | -1.367551  | 2.234378  | 2.579891  |
| C | -0.854114  | 0.728302  | 0.934697  |
| C | -3.002125  | 2.091082  | 4.278893  |
| H | -4.142123  | 0.265780  | 4.319505  |
| C | -1.992795  | 2.826900  | 3.665725  |
| C | -0.037806  | 1.901277  | 0.794382  |
| H | -3.524448  | 2.513550  | 5.130607  |
| H | -1.719900  | 3.820093  | 4.006848  |
| H | -2.983040  | -0.753712 | 2.377501  |
| N | -0.341675  | 2.742485  | 1.757413  |
| H | 0.088072   | 3.658390  | 1.853710  |
| H | 0.751746   | 2.055832  | 0.066099  |
| O | -8.484152  | -2.247370 | -1.316037 |
| C | -9.821807  | -2.728703 | -1.411174 |
| H | -9.746045  | -3.754735 | -1.768270 |
| H | -10.399672 | -2.119706 | -2.109769 |
| H | -10.311875 | -2.695930 | -0.435386 |
| H | -3.206325  | -1.359390 | -0.155260 |



**TS2**

M06-2X SCF energy in Solvent: -3961.916776 a.u.

M06-2X Free energy in Solvent: -3960.885287 a.u.

|   |           |           |           |
|---|-----------|-----------|-----------|
| C | -1.705326 | -4.014953 | 0.418968  |
| C | -0.896750 | -3.827224 | -0.723194 |
| C | -1.104949 | -4.469663 | 1.602300  |
| C | 0.507353  | -4.057271 | -0.628273 |
| C | -1.435484 | -3.449132 | -2.006201 |
| C | 0.251655  | -4.731654 | 1.686661  |
| C | 1.350297  | -3.849402 | -1.765097 |
| C | 1.085245  | -4.510035 | 0.587198  |
| C | -0.635955 | -3.253325 | -3.081207 |
| H | -2.505409 | -3.315207 | -2.098135 |
| H | 0.684410  | -5.090293 | 2.616980  |
| C | 0.787458  | -3.433253 | -3.001304 |
| C | 2.753892  | -4.069590 | -1.671123 |
| C | 2.507914  | -4.704142 | 0.666578  |
| H | -1.062958 | -2.958215 | -4.035032 |
| C | 1.626458  | -3.232580 | -4.103367 |
| C | 3.557078  | -3.869892 | -2.802256 |
| C | 3.307588  | -4.494430 | -0.409933 |
| H | 2.928549  | -5.026453 | 1.617042  |
| C | 2.996300  | -3.451161 | -4.004798 |
| H | 1.191332  | -2.903380 | -5.042694 |
| H | 4.625292  | -4.059817 | -2.732552 |
| H | 4.378321  | -4.672771 | -0.349804 |
| H | 3.631509  | -3.301405 | -4.872515 |
| H | -1.732394 | -4.597563 | 2.478568  |
| C | -5.941878 | -3.545272 | 0.808457  |
| C | -3.836883 | -2.671299 | -0.006989 |
| C | -3.181622 | -3.832851 | 0.445234  |
| C | -3.951631 | -4.841697 | 1.043940  |
| C | -5.319167 | -4.705496 | 1.246672  |
| H | -3.447254 | -5.745581 | 1.372963  |
| H | -5.881070 | -5.486114 | 1.750770  |
| C | -6.502572 | 0.558883  | -1.554824 |
| C | -5.748788 | -0.031018 | -0.536737 |
| C | -4.792209 | 0.712791  | 0.143342  |
| C | -4.620776 | 2.073710  | -0.158785 |
| C | -5.437249 | 2.657445  | -1.134361 |
| C | -6.367229 | 1.908383  | -1.849536 |
| H | -6.959189 | 2.370522  | -2.633943 |
| C | -6.165940 | -1.475881 | -0.352021 |
| C | -5.217789 | -2.554846 | 0.141039  |

|   |           |           |           |
|---|-----------|-----------|-----------|
| H | -5.311142 | 3.715081  | -1.348999 |
| C | -7.361483 | -0.479822 | -2.238461 |
| H | -7.366766 | -0.366423 | -3.326164 |
| C | -6.708216 | -1.794200 | -1.774367 |
| H | -5.857494 | -2.030890 | -2.422245 |
| H | -7.389505 | -2.650294 | -1.778431 |
| C | -7.382854 | -3.123814 | 0.978978  |
| H | -7.765731 | -3.347999 | 1.978714  |
| H | -8.032596 | -3.640527 | 0.261414  |
| C | -7.313272 | -1.615069 | 0.686865  |
| H | -7.021436 | -1.076910 | 1.594656  |
| H | -8.255429 | -1.192152 | 0.325710  |
| C | -3.607570 | 2.901121  | 0.541910  |
| C | -2.680605 | 3.684102  | -0.179329 |
| C | -3.617577 | 2.974701  | 1.937720  |
| C | -1.865506 | 4.621156  | 0.515670  |
| C | -2.495086 | 3.541087  | -1.603609 |
| C | -2.800213 | 3.863769  | 2.621680  |
| H | -4.299374 | 2.332063  | 2.484717  |
| C | -0.969403 | 5.472789  | -0.207435 |
| C | -1.943211 | 4.726154  | 1.930805  |
| C | -1.632494 | 4.336345  | -2.286231 |
| H | -3.022557 | 2.738836  | -2.106156 |
| H | -2.848077 | 3.920789  | 3.705946  |
| C | -0.852390 | 5.348854  | -1.619818 |
| C | -0.192079 | 6.444342  | 0.482863  |
| C | -1.156027 | 5.727556  | 2.600619  |
| H | -1.493644 | 4.200820  | -3.355683 |
| C | 0.044247  | 6.177626  | -2.305992 |
| C | 0.687190  | 7.255689  | -0.243095 |
| C | -0.329905 | 6.553776  | 1.913392  |
| H | -1.250853 | 5.815464  | 3.680234  |
| C | 0.804686  | 7.119634  | -1.622630 |
| H | 0.134635  | 6.077800  | -3.384506 |
| H | 1.279333  | 7.997420  | 0.285550  |
| H | 0.252762  | 7.311388  | 2.430189  |
| H | 1.493602  | 7.754888  | -2.169924 |
| H | -8.403747 | -0.413042 | -1.901630 |
| C | 1.338886  | -0.756942 | 0.927011  |
| N | 3.372234  | -1.122332 | 1.016636  |
| C | 1.043986  | -1.591703 | 1.897508  |
| H | -0.020814 | -1.828632 | 2.009235  |
| O | -1.976143 | 0.581401  | -0.504390 |
| C | 2.121997  | -2.125724 | 2.732806  |

|   |           |           |           |
|---|-----------|-----------|-----------|
| C | 3.408989  | -1.851177 | 2.258675  |
| H | 3.330575  | -1.787794 | 0.234889  |
| C | 1.978388  | -2.858989 | 3.905673  |
| C | 4.549366  | -2.257100 | 2.926299  |
| P | -2.531562 | -0.452190 | 0.409489  |
| C | 3.118622  | -3.281688 | 4.591040  |
| H | 0.984702  | -3.075866 | 4.284781  |
| C | 4.391536  | -2.977324 | 4.113751  |
| H | 5.533071  | -1.994207 | 2.548056  |
| O | -3.140232 | -1.645834 | -0.584123 |
| O | -3.973356 | 0.096825  | 1.053035  |
| O | -1.789683 | -1.067144 | 1.544422  |
| H | 3.011885  | -3.838144 | 5.516239  |
| H | 5.268452  | -3.293624 | 4.668090  |
| N | 4.389247  | -0.208326 | 0.761986  |
| C | 4.356280  | 1.155829  | 1.058725  |
| C | 5.489878  | -0.522568 | -0.005323 |
| C | 5.477798  | 1.693116  | 0.485082  |
| C | 6.187675  | 0.657313  | -0.181699 |
| H | 5.794305  | 2.723505  | 0.550658  |
| C | 5.687250  | -1.906766 | -0.522674 |
| H | 6.694284  | -2.003540 | -0.921956 |
| H | 5.540484  | -2.653759 | 0.264864  |
| H | 4.979096  | -2.127120 | -1.332465 |
| C | 3.311992  | 1.842232  | 1.829129  |
| C | 2.748065  | 1.309642  | 2.993555  |
| C | 2.884265  | 3.098632  | 1.380928  |
| C | 1.747392  | 2.001727  | 3.669154  |
| H | 3.100297  | 0.360197  | 3.383568  |
| C | 1.899172  | 3.797127  | 2.068830  |
| H | 3.302039  | 3.502022  | 0.463311  |
| C | 1.318222  | 3.244823  | 3.208869  |
| H | 1.306817  | 1.568219  | 4.561118  |
| H | 1.561867  | 4.760540  | 1.700461  |
| H | 0.532051  | 3.782600  | 3.729531  |
| C | 7.441894  | 0.909544  | -0.903571 |
| O | 7.970316  | 1.994001  | -0.979307 |
| O | 7.959006  | -0.192477 | -1.488868 |
| C | 9.171743  | 0.034878  | -2.204284 |
| H | 9.452881  | -0.927501 | -2.629206 |
| H | 9.016761  | 0.774294  | -2.992456 |
| H | 9.949953  | 0.400669  | -1.531057 |
| C | 2.286412  | -0.374098 | -2.237677 |
| C | 1.533885  | 0.398772  | -1.353982 |

|   |           |           |           |
|---|-----------|-----------|-----------|
| C | 2.566446  | 0.146670  | -3.494743 |
| C | 1.084666  | 1.670986  | -1.753831 |
| C | 1.094694  | 0.235976  | 0.019649  |
| C | 2.113108  | 1.418791  | -3.873625 |
| H | 3.138411  | -0.450967 | -4.197126 |
| C | 1.363056  | 2.204344  | -3.006385 |
| C | 0.385852  | 1.403407  | 0.354750  |
| H | 2.351839  | 1.796776  | -4.862110 |
| H | 1.014162  | 3.193936  | -3.283214 |
| H | 2.618473  | -1.375370 | -1.971893 |
| N | 0.396532  | 2.234007  | -0.680965 |
| H | -0.155034 | 3.080653  | -0.731865 |
| H | -0.124322 | 1.634309  | 1.280070  |

### IM3

M06-2X SCF energy in Solvent: -3961.94041 a.u.

M06-2X Free energy in Solvent: -3960.903085 a.u.

|   |           |           |           |
|---|-----------|-----------|-----------|
| C | -1.423437 | -3.856684 | 0.414126  |
| C | -0.610391 | -3.526369 | -0.694936 |
| C | -0.799532 | -4.285589 | 1.597092  |
| C | 0.807228  | -3.661314 | -0.586232 |
| C | -1.148163 | -3.088960 | -1.959703 |
| C | 0.570333  | -4.452251 | 1.695534  |
| C | 1.652916  | -3.315434 | -1.687425 |
| C | 1.396207  | -4.153945 | 0.609247  |
| C | -0.342424 | -2.717855 | -2.983348 |
| H | -2.221156 | -3.039557 | -2.077907 |
| H | 1.014855  | -4.804703 | 2.623114  |
| C | 1.087774  | -2.809146 | -2.887330 |
| C | 3.064013  | -3.488611 | -1.600348 |
| C | 2.822629  | -4.312551 | 0.682976  |
| H | -0.771638 | -2.366446 | -3.917207 |
| C | 1.928120  | -2.462184 | -3.951805 |
| C | 3.866104  | -3.168616 | -2.703586 |
| C | 3.621436  | -4.011597 | -0.376000 |
| H | 3.247373  | -4.706439 | 1.604048  |
| C | 3.301435  | -2.649890 | -3.863798 |
| H | 1.490112  | -2.052071 | -4.857159 |
| H | 4.938002  | -3.345371 | -2.650368 |
| H | 4.691167  | -4.204286 | -0.333068 |
| H | 3.936629  | -2.383101 | -4.702080 |
| H | -1.424478 | -4.491658 | 2.459474  |
| C | -5.694185 | -4.000425 | 0.809031  |
| C | -3.745214 | -2.827698 | -0.016847 |

|   |           |           |           |
|---|-----------|-----------|-----------|
| C | -2.915100 | -3.876599 | 0.422033  |
| C | -3.532700 | -4.996270 | 1.006041  |
| C | -4.903663 | -5.066336 | 1.216765  |
| H | -2.903491 | -5.824931 | 1.316104  |
| H | -5.340780 | -5.932287 | 1.704815  |
| C | -6.862660 | 0.029234  | -1.461691 |
| C | -6.012155 | -0.464199 | -0.466877 |
| C | -5.163744 | 0.406117  | 0.207498  |
| C | -5.213250 | 1.784090  | -0.054849 |
| C | -6.114952 | 2.257486  | -1.012918 |
| C | -6.929371 | 1.388174  | -1.734522 |
| H | -7.590778 | 1.768159  | -2.507556 |
| C | -6.216844 | -1.960543 | -0.310761 |
| C | -5.125314 | -2.908896 | 0.153397  |
| H | -6.145276 | 3.325621  | -1.209768 |
| C | -7.570311 | -1.110043 | -2.159174 |
| H | -7.609550 | -0.974630 | -3.243701 |
| C | -6.722159 | -2.322453 | -1.735759 |
| H | -5.852870 | -2.411064 | -2.396084 |
| H | -7.266801 | -3.271180 | -1.756743 |
| C | -7.178391 | -3.791320 | 0.994551  |
| H | -7.519414 | -4.087402 | 1.990613  |
| H | -7.752020 | -4.380986 | 0.268276  |
| C | -7.325443 | -2.281826 | 0.731524  |
| H | -7.107121 | -1.725151 | 1.648735  |
| H | -8.320491 | -1.989902 | 0.383386  |
| C | -4.328991 | 2.732762  | 0.674094  |
| C | -3.375607 | 3.519646  | -0.000180 |
| C | -4.482997 | 2.874984  | 2.055854  |
| C | -2.627001 | 4.483256  | 0.730052  |
| C | -3.095760 | 3.354024  | -1.405936 |
| C | -3.754545 | 3.812551  | 2.772389  |
| H | -5.199789 | 2.238466  | 2.565162  |
| C | -1.647426 | 5.286023  | 0.066187  |
| C | -2.831853 | 4.641539  | 2.127101  |
| C | -2.161319 | 4.109045  | -2.031015 |
| H | -3.623035 | 2.570818  | -1.937472 |
| H | -3.902619 | 3.915840  | 3.843900  |
| C | -1.404587 | 5.107965  | -1.322552 |
| C | -0.897098 | 6.249528  | 0.795519  |
| C | -2.068739 | 5.634178  | 2.837901  |
| H | -1.953193 | 3.963979  | -3.088190 |
| C | -0.424738 | 5.885706  | -1.949381 |
| C | 0.072848  | 7.008498  | 0.129709  |

|   |           |           |           |
|---|-----------|-----------|-----------|
| C | -1.148338 | 6.401717  | 2.205380  |
| H | -2.245483 | 5.748869  | 3.904059  |
| C | 0.305876  | 6.826200  | -1.229006 |
| H | -0.236748 | 5.742213  | -3.009905 |
| H | 0.647180  | 7.740301  | 0.690813  |
| H | -0.573828 | 7.143623  | 2.752912  |
| H | 1.064942  | 7.418332  | -1.730275 |
| H | -8.605476 | -1.206767 | -1.807834 |
| C | 2.180051  | -0.800485 | 0.736139  |
| N | 3.650935  | -1.032736 | 1.034337  |
| C | 1.471850  | -1.313450 | 1.765691  |
| H | 0.383018  | -1.365529 | 1.782831  |
| O | -2.421831 | 0.641023  | -0.638593 |
| C | 2.362488  | -1.749896 | 2.821973  |
| C | 3.680460  | -1.530271 | 2.429659  |
| H | 3.877755  | -1.845891 | 0.423740  |
| C | 2.140607  | -2.298564 | 4.084345  |
| C | 4.792573  | -1.762904 | 3.205843  |
| P | -2.764498 | -0.432739 | 0.339559  |
| C | 3.243993  | -2.566849 | 4.895095  |
| H | 1.129259  | -2.494037 | 4.424221  |
| C | 4.548478  | -2.294871 | 4.476782  |
| H | 5.795306  | -1.518698 | 2.870314  |
| O | -3.236053 | -1.710767 | -0.615221 |
| O | -4.213842 | -0.091257 | 1.070698  |
| O | -1.829141 | -0.909645 | 1.397554  |
| H | 3.085175  | -2.983710 | 5.884258  |
| H | 5.381821  | -2.489053 | 5.141982  |
| N | 4.584029  | -0.017794 | 0.734566  |
| C | 4.404743  | 1.364531  | 0.858911  |
| C | 5.857395  | -0.338488 | 0.298902  |
| C | 5.596303  | 1.913282  | 0.474324  |
| C | 6.501763  | 0.869767  | 0.132656  |
| H | 5.818305  | 2.969501  | 0.443949  |
| C | 6.247554  | -1.746264 | -0.009987 |
| H | 7.319852  | -1.783561 | -0.187767 |
| H | 6.004911  | -2.439937 | 0.803054  |
| H | 5.739828  | -2.094717 | -0.918577 |
| C | 3.143902  | 2.027931  | 1.226279  |
| C | 2.476759  | 1.752361  | 2.421507  |
| C | 2.600546  | 2.947357  | 0.320679  |
| C | 1.247448  | 2.349533  | 2.680083  |
| H | 2.913130  | 1.062703  | 3.140197  |
| C | 1.383505  | 3.558736  | 0.592747  |

|   |           |           |           |
|---|-----------|-----------|-----------|
| H | 3.118112  | 3.133414  | -0.616160 |
| C | 0.696695  | 3.244462  | 1.765526  |
| H | 0.713428  | 2.112454  | 3.594163  |
| H | 0.956120  | 4.259445  | -0.118281 |
| H | -0.268792 | 3.697442  | 1.964854  |
| C | 7.877757  | 1.146460  | -0.315087 |
| O | 8.333857  | 2.258999  | -0.421679 |
| O | 8.588916  | 0.034715  | -0.592237 |
| C | 9.929800  | 0.282705  | -1.017732 |
| H | 10.370130 | -0.695899 | -1.200712 |
| H | 9.934362  | 0.885392  | -1.927822 |
| H | 10.481819 | 0.815616  | -0.241115 |
| C | 3.605488  | 0.266714  | -2.291538 |
| C | 2.328508  | 0.271264  | -1.713170 |
| C | 3.780966  | 0.808044  | -3.555389 |
| C | 1.258044  | 0.854729  | -2.448297 |
| C | 1.745758  | -0.163837 | -0.464107 |
| C | 2.704401  | 1.359417  | -4.269598 |
| H | 4.770436  | 0.804970  | -4.001317 |
| C | 1.430924  | 1.391144  | -3.724032 |
| C | 0.408946  | 0.193879  | -0.505297 |
| H | 2.874012  | 1.776766  | -5.256759 |
| H | 0.593604  | 1.827855  | -4.258748 |
| H | 4.457532  | -0.161850 | -1.774751 |
| N | 0.119550  | 0.784056  | -1.673585 |
| H | -0.839324 | 1.077697  | -1.854211 |
| H | -0.340755 | 0.073852  | 0.262215  |

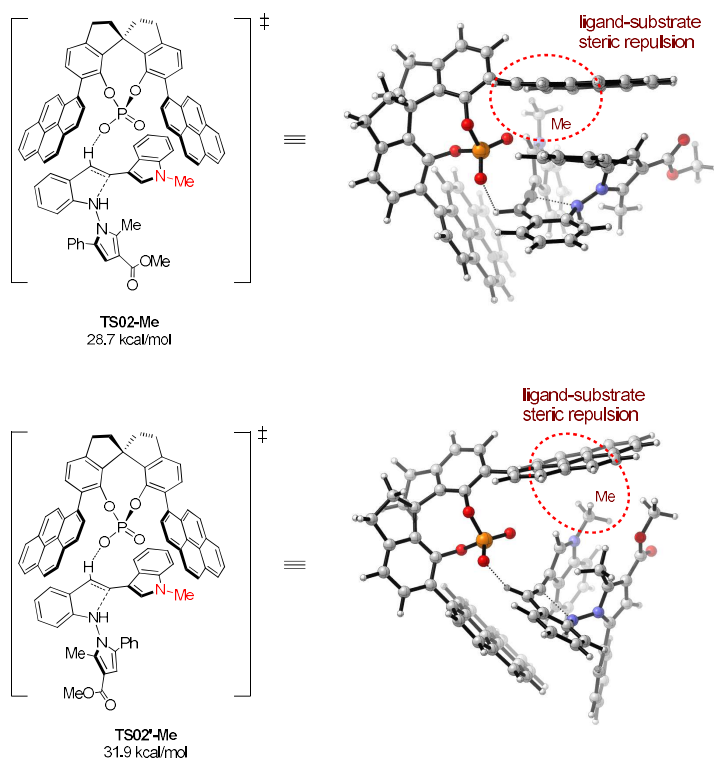

Figure S2. Nucleophilic cyclization transition states with indole N-Me group involved substrate.

#### IM1-Me

M062X SCF energy in Solvent: -4001.264442 a.u.

M062X Free energy in Solvent: -4000.206905 a.u.

|   |           |           |           |
|---|-----------|-----------|-----------|
| P | -1.897778 | -1.421359 | -0.399230 |
| O | -1.089938 | -1.008958 | 0.756188  |
| O | -3.469587 | -1.273464 | -0.051361 |
| O | -1.755632 | -2.944942 | -0.897447 |
| C | -4.348772 | 0.873738  | -1.728655 |
| C | -4.703648 | 1.619747  | -0.586271 |
| C | -3.615753 | 1.488132  | -2.748663 |
| C | -4.350267 | 2.997481  | -0.520184 |
| C | -5.453701 | 1.054305  | 0.508516  |
| C | -3.237427 | 2.820493  | -2.668920 |
| C | -4.756564 | 3.790267  | 0.598062  |
| C | -3.613937 | 3.603063  | -1.573042 |
| C | -5.822284 | 1.803455  | 1.574944  |
| H | -5.729748 | 0.006425  | 0.462296  |
| H | -2.656918 | 3.272242  | -3.468425 |
| C | -5.494368 | 3.202038  | 1.660078  |
| C | -4.432538 | 5.173674  | 0.646432  |
| C | -3.300217 | 5.006311  | -1.497886 |
| H | -6.388711 | 1.357912  | 2.388274  |



|   |           |           |           |
|---|-----------|-----------|-----------|
| C | -5.874372 | 3.990905  | 2.752235  |
| C | -4.823678 | 5.925951  | 1.760752  |
| C | -3.703635 | 5.759349  | -0.448805 |
| H | -2.725874 | 5.448627  | -2.306790 |
| C | -5.536384 | 5.339574  | 2.802877  |
| H | -6.436489 | 3.535304  | 3.562779  |
| H | -4.566118 | 6.981107  | 1.798448  |
| H | -3.457189 | 6.815568  | -0.398163 |
| H | -5.834206 | 5.939048  | 3.657209  |
| H | -3.328501 | 0.891059  | -3.609133 |
| C | -5.565751 | -3.187971 | -2.377578 |
| C | -4.365826 | -1.569988 | -1.073811 |
| C | -4.788055 | -0.536952 | -1.919477 |
| C | -5.613059 | -0.871676 | -2.998317 |
| C | -5.991817 | -2.189907 | -3.243005 |
| H | -5.941649 | -0.076330 | -3.660532 |
| H | -6.601452 | -2.432203 | -4.108246 |
| C | -3.484943 | -5.153475 | 1.459141  |
| C | -3.240049 | -4.335803 | 0.353696  |
| C | -1.953153 | -3.880698 | 0.120442  |
| C | -0.869191 | -4.274050 | 0.918843  |
| C | -1.140222 | -5.151651 | 1.977145  |
| C | -2.436437 | -5.572279 | 2.268094  |
| H | -2.620564 | -6.216711 | 3.122615  |
| C | -4.515165 | -4.130852 | -0.442604 |
| C | -4.773345 | -2.881254 | -1.266437 |
| H | -0.309904 | -5.487430 | 2.590985  |
| C | -4.968055 | -5.414129 | 1.592347  |
| H | -5.314607 | -5.336351 | 2.626382  |
| C | -5.575554 | -4.333239 | 0.676884  |
| H | -5.677196 | -3.394836 | 1.232620  |
| H | -6.557004 | -4.599850 | 0.274226  |
| C | -5.785615 | -4.680253 | -2.463853 |
| H | -5.704022 | -5.056775 | -3.486933 |
| H | -6.784447 | -4.949093 | -2.098529 |
| C | -4.684517 | -5.224736 | -1.536347 |
| H | -3.744500 | -5.306899 | -2.091940 |
| H | -4.913223 | -6.204652 | -1.107831 |
| C | 0.513326  | -3.822358 | 0.606656  |
| C | 1.385546  | -3.299541 | 1.587570  |
| C | 0.970008  | -3.968601 | -0.707626 |
| C | 2.732299  | -3.001310 | 1.227788  |
| C | 0.970493  | -3.012869 | 2.939207  |
| C | 2.267178  | -3.641037 | -1.066930 |

|   |           |           |           |
|---|-----------|-----------|-----------|
| H | 0.288885  | -4.358647 | -1.457117 |
| C | 3.653019  | -2.514807 | 2.207872  |
| C | 3.170942  | -3.167464 | -0.112440 |
| C | 1.844902  | -2.546181 | 3.863747  |
| H | -0.073831 | -3.147506 | 3.198211  |
| H | 2.595611  | -3.761036 | -2.094606 |
| C | 3.224650  | -2.299276 | 3.542340  |
| C | 4.995321  | -2.218129 | 1.845001  |
| C | 4.529129  | -2.837606 | -0.457575 |
| H | 1.506711  | -2.324234 | 4.872705  |
| C | 4.138451  | -1.821126 | 4.488257  |
| C | 5.881086  | -1.750988 | 2.821545  |
| C | 5.400895  | -2.385896 | 0.474355  |
| H | 4.835031  | -2.962833 | -1.492366 |
| C | 5.456280  | -1.558777 | 4.131907  |
| H | 3.801358  | -1.650546 | 5.507193  |
| H | 6.908412  | -1.535208 | 2.540026  |
| H | 6.421236  | -2.126944 | 0.205178  |
| H | 6.154679  | -1.190303 | 4.876534  |
| H | -5.222505 | -6.422015 | 1.242065  |
| C | 0.183777  | 1.771670  | -1.107673 |
| C | 0.790869  | 1.058394  | -1.888214 |
| H | -1.105519 | 0.114951  | -1.680625 |
| O | -1.665170 | -0.685525 | -1.776791 |
| C | 1.650572  | 0.179512  | -2.626957 |
| C | 3.050455  | 0.289377  | -2.459502 |
| C | 1.133296  | -0.836911 | -3.440178 |
| N | 3.567316  | 1.392190  | -1.759614 |
| C | 3.886594  | -0.654831 | -3.057624 |
| C | 1.975579  | -1.744507 | -4.067031 |
| H | 0.057350  | -0.917201 | -3.551845 |
| C | 3.349950  | -1.656919 | -3.857609 |
| H | 4.955675  | -0.605812 | -2.884706 |
| H | 1.561713  | -2.525206 | -4.695669 |
| H | 4.018822  | -2.376961 | -4.320055 |
| N | 4.789322  | 1.243683  | -1.124508 |
| C | 4.967717  | 0.976763  | 0.233061  |
| C | 5.989371  | 1.458753  | -1.750240 |
| C | 6.321730  | 0.993539  | 0.452890  |
| C | 6.966079  | 1.273458  | -0.782527 |
| H | 6.816988  | 0.818065  | 1.396728  |
| C | 6.072120  | 1.836762  | -3.192063 |
| H | 6.497865  | 1.028516  | -3.794221 |
| H | 6.728576  | 2.700242  | -3.310116 |

|   |           |           |           |
|---|-----------|-----------|-----------|
| H | 5.077909  | 2.077379  | -3.572996 |
| C | 3.860445  | 0.883740  | 1.193878  |
| C | 4.031477  | 1.461902  | 2.460078  |
| C | 2.645698  | 0.251328  | 0.901830  |
| C | 3.012033  | 1.418598  | 3.402595  |
| H | 4.967600  | 1.962264  | 2.688306  |
| C | 1.616524  | 0.228790  | 1.838423  |
| H | 2.511241  | -0.275539 | -0.039301 |
| C | 1.796571  | 0.815985  | 3.087306  |
| H | 3.164550  | 1.868911  | 4.378807  |
| H | 0.686763  | -0.271673 | 1.591872  |
| H | 0.993428  | 0.786059  | 3.818407  |
| C | 8.417437  | 1.346461  | -0.940608 |
| O | 9.221189  | 1.178974  | -0.050816 |
| C | 0.153866  | 5.036676  | -0.848629 |
| C | -0.415313 | 4.028156  | -0.062323 |
| C | 0.029362  | 6.351626  | -0.431411 |
| C | -1.110669 | 4.376109  | 1.115660  |
| C | -0.479955 | 2.591373  | -0.162667 |
| C | -0.640871 | 6.676778  | 0.764047  |
| H | 0.468008  | 7.147035  | -1.025206 |
| C | -1.217176 | 5.697235  | 1.556249  |
| C | -1.212861 | 2.151557  | 0.923957  |
| H | -0.704088 | 7.715926  | 1.071372  |
| H | -1.743004 | 5.946787  | 2.472606  |
| H | 0.685512  | 4.783979  | -1.761367 |
| N | -1.602493 | 3.216001  | 1.678030  |
| H | -1.456160 | 1.135261  | 1.210303  |
| O | 8.789810  | 1.622982  | -2.212707 |
| C | 10.197387 | 1.710279  | -2.407810 |
| H | 10.339762 | 1.952448  | -3.460185 |
| H | 10.679093 | 0.760300  | -2.164445 |
| H | 10.626469 | 2.488504  | -1.772639 |
| H | 2.892187  | 1.852815  | -1.155205 |
| C | -2.347225 | 3.146661  | 2.917443  |
| H | -1.676014 | 3.203111  | 3.780367  |
| H | -3.065793 | 3.969780  | 2.957740  |
| H | -2.900284 | 2.206382  | 2.943540  |

#### TS02-Me

M062X SCF energy in Solvent: -4001.217499 a.u.

M062X Free energy in Solvent: -4000.161138 a.u.

|   |          |          |          |
|---|----------|----------|----------|
| C | 4.232414 | 1.276662 | 1.412209 |
| C | 3.843603 | 2.230030 | 0.444881 |

|   |          |           |           |
|---|----------|-----------|-----------|
| C | 4.015497 | 1.557343  | 2.767416  |
| C | 3.277006 | 3.467679  | 0.872175  |
| C | 4.027031 | 2.022169  | -0.971371 |
| C | 3.450284 | 2.753382  | 3.185649  |
| C | 2.923194 | 4.468862  | -0.086706 |
| C | 3.084533 | 3.731559  | 2.255122  |
| C | 3.661084 | 2.959386  | -1.877746 |
| H | 4.467397 | 1.090469  | -1.304147 |
| H | 3.286212 | 2.938776  | 4.243846  |
| C | 3.107141 | 4.223710  | -1.473380 |
| C | 2.417467 | 5.727415  | 0.342855  |
| C | 2.521825 | 4.992601  | 2.659316  |
| H | 3.810941 | 2.781013  | -2.939188 |
| C | 2.782389 | 5.224795  | -2.395895 |
| C | 2.132017 | 6.711750  | -0.610106 |
| C | 2.212512 | 5.948682  | 1.750836  |
| H | 2.368792 | 5.166987  | 3.720883  |
| C | 2.312728 | 6.460596  | -1.965706 |
| H | 2.921553 | 5.030714  | -3.455860 |
| H | 1.761515 | 7.677307  | -0.275481 |
| H | 1.810928 | 6.906900  | 2.069597  |
| H | 2.079233 | 7.231572  | -2.693645 |
| H | 4.280919 | 0.796276  | 3.494808  |
| C | 6.311172 | -2.369098 | 0.557020  |
| C | 4.411362 | -0.929957 | 0.174960  |
| C | 4.939321 | 0.014378  | 1.069226  |
| C | 6.159342 | -0.269317 | 1.695670  |
| C | 6.840877 | -1.461076 | 1.464549  |
| H | 6.566106 | 0.461206  | 2.389179  |
| H | 7.765767 | -1.674993 | 1.991724  |
| C | 3.416358 | -3.928079 | -2.912194 |
| C | 3.425122 | -3.522028 | -1.575341 |
| C | 2.242220 | -3.503681 | -0.844066 |
| C | 1.047573 | -3.955979 | -1.425840 |
| C | 1.074565 | -4.389445 | -2.757050 |
| C | 2.243654 | -4.363578 | -3.513218 |
| H | 2.233175 | -4.676302 | -4.553400 |
| C | 4.834903 | -3.164454 | -1.144373 |
| C | 5.121544 | -2.087727 | -0.116931 |
| H | 0.146486 | -4.741608 | -3.199061 |
| C | 4.790223 | -3.760170 | -3.518945 |
| H | 4.755956 | -3.358340 | -4.535706 |
| C | 5.469207 | -2.808035 | -2.519429 |
| H | 5.203311 | -1.773144 | -2.761686 |

|   |           |           |           |
|---|-----------|-----------|-----------|
| H | 6.560649  | -2.884619 | -2.506612 |
| C | 6.820230  | -3.738087 | 0.165857  |
| H | 7.174097  | -4.313338 | 1.026005  |
| H | 7.659439  | -3.657253 | -0.536607 |
| C | 5.585445  | -4.367135 | -0.508294 |
| H | 4.936813  | -4.812674 | 0.252991  |
| H | 5.831802  | -5.139090 | -1.243707 |
| C | -0.224947 | -4.070524 | -0.660651 |
| C | -1.403056 | -3.416146 | -1.070824 |
| C | -0.281767 | -4.975420 | 0.403470  |
| C | -2.641643 | -3.758482 | -0.460966 |
| C | -1.404733 | -2.397358 | -2.092253 |
| C | -1.484701 | -5.297765 | 1.013310  |
| H | 0.637948  | -5.453962 | 0.726375  |
| C | -3.858496 | -3.159939 | -0.914984 |
| C | -2.683086 | -4.723156 | 0.578817  |
| C | -2.555340 | -1.803292 | -2.492856 |
| H | -0.442981 | -2.108503 | -2.506174 |
| H | -1.507795 | -6.017757 | 1.827268  |
| C | -3.832056 | -2.181231 | -1.943521 |
| C | -5.103692 | -3.560126 | -0.357700 |
| C | -3.954229 | -5.087239 | 1.145759  |
| H | -2.545625 | -1.031696 | -3.260402 |
| C | -5.034910 | -1.626009 | -2.392665 |
| C | -6.286608 | -2.994814 | -0.852175 |
| C | -5.109087 | -4.543112 | 0.694029  |
| H | -3.963691 | -5.820496 | 1.948219  |
| C | -6.252402 | -2.036208 | -1.859039 |
| H | -5.009734 | -0.864268 | -3.167686 |
| H | -7.237431 | -3.308811 | -0.429980 |
| H | -6.065139 | -4.834402 | 1.120651  |
| H | -7.173755 | -1.581130 | -2.204755 |
| H | 5.315179  | -4.722556 | -3.569645 |
| C | 0.064012  | 1.842907  | 0.552555  |
| N | -2.074710 | 1.841664  | 1.608581  |
| C | 0.558779  | 1.534720  | 1.717056  |
| H | 1.644269  | 1.431247  | 1.762394  |
| O | 0.705361  | -1.089037 | -0.383189 |
| C | -0.207665 | 1.229497  | 2.925149  |
| C | -1.593676 | 1.404736  | 2.884286  |
| H | -2.093634 | 2.856579  | 1.537229  |
| C | 0.396200  | 0.708963  | 4.066703  |
| C | -2.389327 | 1.073124  | 3.970438  |
| P | 1.891213  | -1.352878 | 0.485577  |

|   |           |           |           |
|---|-----------|-----------|-----------|
| C | -0.399260 | 0.354845  | 5.151024  |
| H | 1.463173  | 0.512551  | 4.049131  |
| C | -1.781289 | 0.536340  | 5.102613  |
| H | -3.468067 | 1.177195  | 3.904949  |
| O | 3.175198  | -0.738899 | -0.386839 |
| O | 2.246524  | -2.973569 | 0.425855  |
| O | 1.997128  | -0.936158 | 1.908696  |
| H | 0.055012  | -0.090894 | 6.029294  |
| H | -2.395369 | 0.241144  | 5.946849  |
| N | -3.312947 | 1.365151  | 1.167956  |
| C | -3.742100 | 0.035709  | 1.177500  |
| C | -4.217598 | 2.175426  | 0.533396  |
| C | -4.965340 | 0.031375  | 0.560356  |
| C | -5.265821 | 1.353303  | 0.138071  |
| H | -5.582747 | -0.840234 | 0.402001  |
| C | -3.966148 | 3.639501  | 0.376766  |
| H | -4.827116 | 4.098879  | -0.102399 |
| H | -3.821926 | 4.130068  | 1.348169  |
| H | -3.083928 | 3.841210  | -0.244125 |
| C | -3.043134 | -1.067677 | 1.858383  |
| C | -3.765626 | -1.851981 | 2.763686  |
| C | -1.676317 | -1.306642 | 1.678994  |
| C | -3.118452 | -2.823361 | 3.520866  |
| H | -4.829399 | -1.670839 | 2.890551  |
| C | -1.025916 | -2.256839 | 2.458370  |
| H | -1.106300 | -0.752722 | 0.936669  |
| C | -1.744978 | -3.005403 | 3.389460  |
| H | -3.686999 | -3.423629 | 4.225207  |
| H | 0.044437  | -2.398351 | 2.342304  |
| H | -1.233259 | -3.745874 | 3.997384  |
| C | -6.488014 | 1.678479  | -0.598399 |
| O | -7.336375 | 0.872624  | -0.910293 |
| O | -6.600292 | 2.991557  | -0.916473 |
| C | -7.789198 | 3.327023  | -1.624631 |
| H | -7.745857 | 4.402884  | -1.789369 |
| H | -7.832902 | 2.794824  | -2.577654 |
| H | -8.672834 | 3.062914  | -1.039922 |
| C | -0.565758 | 4.721247  | -0.949410 |
| C | -0.441296 | 3.409163  | -1.397399 |
| C | -0.902337 | 5.701616  | -1.876959 |
| C | -0.654799 | 3.116680  | -2.753743 |
| C | -0.163779 | 2.131937  | -0.749572 |
| C | -1.101920 | 5.390904  | -3.228491 |
| H | -0.992073 | 6.732629  | -1.551006 |

|   |           |           |           |
|---|-----------|-----------|-----------|
| C | -0.978792 | 4.085627  | -3.693798 |
| C | -0.239508 | 1.144486  | -1.765448 |
| H | -1.358114 | 6.181765  | -3.925186 |
| H | -1.139461 | 3.839943  | -4.738425 |
| H | -0.380279 | 4.969304  | 0.092000  |
| N | -0.503860 | 1.728046  | -2.927501 |
| H | -0.063852 | 0.077978  | -1.623915 |
| C | -0.617053 | 1.054092  | -4.208288 |
| H | -1.623358 | 1.191049  | -4.612030 |
| H | 0.114779  | 1.466252  | -4.906858 |
| H | -0.422055 | -0.007945 | -4.060594 |

**TS02'-Me**

M062X SCF energy in Solvent: -4001.217656 a.u.

M062X Free energy in Solvent: -4000.156030 a.u.

|   |           |           |           |
|---|-----------|-----------|-----------|
| C | -1.169265 | -4.274796 | 0.698854  |
| C | -0.208811 | -4.118498 | -0.319806 |
| C | -0.741518 | -4.440306 | 2.021962  |
| C | 1.174049  | -4.104583 | 0.023403  |
| C | -0.566973 | -3.995027 | -1.711043 |
| C | 0.601414  | -4.429185 | 2.358913  |
| C | 2.166722  | -3.948807 | -0.993077 |
| C | 1.578705  | -4.239122 | 1.376442  |
| C | 0.376585  | -3.888023 | -2.676815 |
| H | -1.619982 | -3.997998 | -1.970201 |
| H | 0.907593  | -4.534373 | 3.396405  |
| C | 1.780872  | -3.868190 | -2.358347 |
| C | 3.545592  | -3.881745 | -0.645175 |
| C | 2.973680  | -4.126611 | 1.708305  |
| H | 0.087056  | -3.809091 | -3.720766 |
| C | 2.772326  | -3.769825 | -3.342349 |
| C | 4.506262  | -3.760630 | -1.658478 |
| C | 3.914005  | -3.945710 | 0.747303  |
| H | 3.255547  | -4.185362 | 2.757319  |
| C | 4.119612  | -3.725222 | -2.994585 |
| H | 2.474730  | -3.718067 | -4.385886 |
| H | 5.556270  | -3.696888 | -1.386063 |
| H | 4.967828  | -3.874217 | 1.001566  |
| H | 4.875221  | -3.646814 | -3.770700 |
| H | -1.497638 | -4.535575 | 2.794263  |
| C | -5.414805 | -4.460546 | 0.279970  |
| C | -3.353781 | -3.255578 | -0.097618 |
| C | -2.634306 | -4.332903 | 0.448988  |
| C | -3.333768 | -5.465380 | 0.880920  |

|   |           |           |           |
|---|-----------|-----------|-----------|
| C | -4.721350 | -5.535238 | 0.816252  |
| H | -2.767212 | -6.289517 | 1.305266  |
| H | -5.248413 | -6.403597 | 1.200355  |
| C | -6.190178 | -0.368257 | -2.033035 |
| C | -5.516789 | -0.886516 | -0.924470 |
| C | -4.818539 | -0.040066 | -0.070505 |
| C | -4.815213 | 1.348849  | -0.301778 |
| C | -5.595356 | 1.844730  | -1.356857 |
| C | -6.264688 | 1.002232  | -2.237609 |
| H | -6.821790 | 1.413245  | -3.074390 |
| C | -5.733839 | -2.385477 | -0.848424 |
| C | -4.738080 | -3.343153 | -0.219257 |
| H | -5.651074 | 2.920002  | -1.496688 |
| C | -6.741314 | -1.487128 | -2.885667 |
| H | -6.580167 | -1.314166 | -3.953524 |
| C | -5.970778 | -2.707481 | -2.351176 |
| H | -4.996336 | -2.774561 | -2.846676 |
| H | -6.494075 | -3.657017 | -2.496646 |
| C | -6.909232 | -4.255588 | 0.192535  |
| H | -7.426823 | -4.586998 | 1.097177  |
| H | -7.337791 | -4.815523 | -0.648366 |
| C | -7.011663 | -2.737785 | -0.036006 |
| H | -6.961535 | -2.215964 | 0.925354  |
| H | -7.929000 | -2.429247 | -0.546173 |
| C | -4.034209 | 2.285663  | 0.545870  |
| C | -3.289187 | 3.344376  | -0.023675 |
| C | -4.082039 | 2.167464  | 1.940652  |
| C | -2.694428 | 4.321019  | 0.826727  |
| C | -3.085599 | 3.487271  | -1.446789 |
| C | -3.450953 | 3.081301  | 2.768086  |
| H | -4.631096 | 1.339094  | 2.372944  |
| C | -2.042918 | 5.467967  | 0.269289  |
| C | -2.770236 | 4.181948  | 2.237303  |
| C | -2.486607 | 4.582168  | -1.975593 |
| H | -3.417929 | 2.687134  | -2.096938 |
| H | -3.507293 | 2.963314  | 3.846724  |
| C | -1.966905 | 5.632480  | -1.140970 |
| C | -1.486073 | 6.461840  | 1.122164  |
| C | -2.166391 | 5.182668  | 3.074811  |
| H | -2.362684 | 4.672193  | -3.052207 |
| C | -1.344479 | 6.769631  | -1.668852 |
| C | -0.891666 | 7.596145  | 0.553497  |
| C | -1.557234 | 6.272178  | 2.547165  |
| H | -2.223213 | 5.048915  | 4.151742  |



|   |           |           |           |
|---|-----------|-----------|-----------|
| C | -0.821401 | 7.747253  | -0.826873 |
| H | -1.286424 | 6.887174  | -2.747760 |
| H | -0.483374 | 8.360525  | 1.209679  |
| H | -1.119009 | 7.029888  | 3.191031  |
| H | -0.356276 | 8.631783  | -1.250713 |
| H | -7.822386 | -1.601344 | -2.736751 |
| C | 1.195509  | -0.582013 | 0.440336  |
| N | 3.238098  | -0.430468 | 1.266177  |
| C | 0.779483  | -1.223542 | 1.500774  |
| H | -0.219400 | -1.683848 | 1.519614  |
| O | -1.815815 | 0.187984  | 0.118195  |
| C | 1.587929  | -1.235885 | 2.728401  |
| C | 2.902872  | -0.769805 | 2.616418  |
| H | 3.694551  | -1.198447 | 0.766024  |
| C | 1.094715  | -1.623051 | 3.969986  |
| C | 3.731426  | -0.663581 | 3.721346  |
| P | -2.534297 | -0.956166 | 0.742834  |
| C | 1.924748  | -1.527327 | 5.086916  |
| H | 0.063234  | -1.956692 | 4.042832  |
| C | 3.227583  | -1.046170 | 4.966971  |
| H | 4.734000  | -0.258602 | 3.619321  |
| O | -2.706418 | -2.102771 | -0.463606 |
| O | -4.133381 | -0.583109 | 0.984542  |
| O | -2.085341 | -1.632948 | 1.995552  |
| H | 1.545269  | -1.810306 | 6.063162  |
| H | 3.855153  | -0.958567 | 5.847564  |
| N | 3.890582  | 0.768114  | 0.987897  |
| C | 4.938837  | 0.840421  | 0.064868  |
| C | 3.221017  | 1.973469  | 1.060713  |
| C | 4.931460  | 2.112461  | -0.440912 |
| C | 3.870671  | 2.828102  | 0.184941  |
| H | 5.638852  | 2.532516  | -1.140738 |
| C | 2.101032  | 2.189650  | 2.025768  |
| H | 1.549903  | 3.088278  | 1.755559  |
| H | 1.411592  | 1.344778  | 2.052797  |
| H | 2.498185  | 2.324429  | 3.037909  |
| C | 5.866061  | -0.267762 | -0.188411 |
| C | 6.490614  | -0.367193 | -1.440858 |
| C | 6.214127  | -1.191385 | 0.807025  |
| C | 7.443285  | -1.348341 | -1.682455 |
| H | 6.209691  | 0.331673  | -2.222012 |
| C | 7.164010  | -2.179164 | 0.558297  |
| H | 5.765068  | -1.122476 | 1.794099  |
| C | 7.786545  | -2.259218 | -0.683549 |

|   |           |           |           |
|---|-----------|-----------|-----------|
| H | 7.919570  | -1.405389 | -2.656236 |
| H | 7.429247  | -2.876459 | 1.347333  |
| H | 8.532771  | -3.024148 | -0.871909 |
| C | 3.523047  | 4.206230  | -0.176165 |
| O | 3.977512  | 4.792290  | -1.135645 |
| O | 2.607906  | 4.755996  | 0.645423  |
| C | 2.224177  | 6.095586  | 0.338707  |
| H | 1.607476  | 6.423027  | 1.173925  |
| H | 3.106811  | 6.727893  | 0.225591  |
| H | 1.636200  | 6.133378  | -0.582987 |
| C | 3.076201  | -0.582138 | -2.275533 |
| C | 2.152235  | 0.315102  | -1.750213 |
| C | 3.830833  | -0.179421 | -3.369891 |
| C | 2.029061  | 1.596088  | -2.310805 |
| C | 1.236763  | 0.271050  | -0.624691 |
| C | 3.702591  | 1.108577  | -3.911695 |
| H | 4.539513  | -0.879421 | -3.802458 |
| C | 2.798990  | 2.025800  | -3.385289 |
| C | 0.580001  | 1.523603  | -0.606746 |
| H | 4.315011  | 1.395694  | -4.760017 |
| H | 2.706505  | 3.027331  | -3.791223 |
| H | 3.195099  | -1.569179 | -1.844599 |
| N | 1.052983  | 2.293392  | -1.582646 |
| H | -0.226122 | 1.827562  | 0.052011  |
| C | 0.675540  | 3.670411  | -1.847329 |
| H | 1.585349  | 4.261195  | -1.988881 |
| H | 0.050239  | 3.729570  | -2.741030 |
| H | 0.116895  | 4.052754  | -0.992276 |
